# Supplementary material for: Curcumin improves atrial fibrillation susceptibility by regulating tsRNA expression in aging mouse atrium
Source: PeerJ. 2024 Jul 26;12:e17495. doi: 10.7717/peerj.17495 (PMC11285363; doi:10.7717/peerj.17495)
Supplement: Supplemental Information 1 [file peerj-12-17495-s001.xlsx]

## Sheet: 18m_tsRNAVShigh_dosage_Cur_tsRN
seq_annotation	log2FoldChange	pvalue	Style	18m+Cur1	18m+Cur2	18m+Cur3	18m1	18m2	18m3
AAAAAAAATTAATGATTTCGACTCATTAGATTA,mature-mt_tRNA-Arg-TCG	3.12406	0.00179886	up	5	3	1	5	22	47
AAAAAACATTAGACTGTGAATCT,mature-mt_tRNA-His-GTG	-2.21965	0.00457802	down	40	40	12	8	6	4
AAAAAACATTAGACTGTGAATCTGACAACAGGAA,mature-mt_tRNA-His-GTG	1.89008	0.024066	up	30	9	0	40	30	48
AAAAACATGGCTTTCTTACC,mature-mt_tRNA-Ser-GCT	-1.64318	0.00377593	down	184	115	47	45	34	19
AAAAACATTAGACTGTGAATCTGACAACAGGAA,mature-mt_tRNA-His-GTG	1.22594	0.0479328	up	54	13	13	53	48	64
AAAAACATTAGACTGTGAATCTGACAACAGGAAA,mature-mt_tRNA-His-GTG	1.56196	0.0155208	up	35	14	7	59	36	49
AAAAACATTAGACTGTGAATCTGACAACAGGAAAT,mature-mt_tRNA-His-GTG	1.45078	0.0149621	up	43	18	11	55	45	76
AAAAACATTAGACTGTGAATCTGACAACAGGAAATA,mature-mt_tRNA-His-GTG	1.7834	0.00730316	up	95	10	16	73	116	170
AAAACATTAGACTGTGAATCTGACAACAGGAAA,mature-mt_tRNA-His-GTG	1.28476	0.01138	up	76	40	26	123	91	99
AAAACATTAGACTGTGAATCTGACAACAGGAAAT,mature-mt_tRNA-His-GTG	1.13593	0.0238009	up	114	53	36	145	100	155
AAAACATTAGACTGTGAATCTGACAACAGGAAATA,mature-mt_tRNA-His-GTG	1.12001	0.0430222	up	104	30	26	121	92	91
AAAATCAATTACATAACTTTGTC,mature-mt_tRNA-Asp-GTC	-2.30923	0.0205256	down	20	54	23	16	0	2
AAAATCTCCATAGTGACC,mature-mt_tRNA-Lys-TTT	-2.41209	0.0150073	down	22	48	18	13	0	2
AAACCCAGAAGAGAGTACC,mature-mt_tRNA-Gly-TCC	-1.4281	0.0157671	down	237	247	136	129	55	27
AAACCTTGGTGCAAATCCAAATAAAAGTACCA,mature-mt_tRNA-Leu-TAG_CCA_end	1.75619	0.0015489	up	66	31	15	99	80	157
AAACGTTGGTTTAAATCCTTCCCGTACTACCA,mature-mt_tRNA-Met-CAT_CCA_end	1.69343	0.0103387	up	37	6	12	45	47	69
AAAGCAATTGATTTGCATTCAATAGATGTAGGATGAAGT,mature-mt_tRNA-Ala-TGC	1.98205	0.0268714	up	25	3	3	28	9	65
AAAGTTAAATTATAGATCAAT,mature-mt_tRNA-Asp-GTC	-1.47443	0.0173776	down	80	103	46	41	25	11
AAAGTTAGAGACCTTAAAATCTCCATAGTGACCA,mature-mt_tRNA-Lys-TTT_CCA_end	1.38704	0.00368272	up	71	47	26	109	118	122
AAATCCTCTCCCTAATACC,mature-mt_tRNA-Leu-TAA	-1.30697	0.0105136	down	302	240	102	101	93	43
AAATCCTCTTTTTACCACC,mature-mt_tRNA-Tyr-GTA	-1.6116	0.00468288	down	126	95	59	40	32	13
AAATCCTTCCCGTACTACC,mature-mt_tRNA-Met-CAT	-1.69874	0.0149143	down	92	60	29	30	14	5
AAATCTCGGTGGAACCTC,mature-tRNA-Gln-CTG	-1.6793	0.0100471	down	107	53	28	8	34	13
AAATCTCGGTGGAACCTCC,mature-tRNA-Gln-CTG	-1.63649	0.00754451	down	289	200	77	12	91	70
AAATCTCGGTGGAACCTCCA,mature-tRNA-Gln-CTG_CCA_end	-1.39408	0.0123703	down	1340	1071	382	90	453	466
AACACACAAGTTTAACTTCTGCC,mature-mt_tRNA-Trp-TCA	-1.71826	0.0366305	down	32	28	22	12	11	1
AACCCAGAAGAGAGTACC,mature-mt_tRNA-Gly-TCC	-1.58933	0.0133623	down	50	43	58	25	13	12
AACCTGAAATGAAGATCTTCTCTTCTCAAGACACCA,mature-mt_tRNA-Thr-TGT_CCA_end	1.62617	0.0420914	up	16	5	4	28	15	25
AACCTTGGTGCAAATCCAAATAAAAGTACCA,mature-mt_tRNA-Leu-TAG_CCA_end	2.07779	0.000419445	up	36	14	10	75	55	97
AAGAAAACACACAAGTTT,mature-mt_tRNA-Trp-TCA	2.48123	0.0189321	up	7	4	2	1	53	18
AAGAAAGATTGCAAGAACTGCTAATTCATGC,mature-mt_tRNA-Ser-GCT_5_end	1.05964	0.0392186	up	659	142	191	651	502	663
AAGAAAGATTGCAAGAACTGCTAATTCATGCT,mature-mt_tRNA-Ser-GCT_5_end	1.2386	0.0198465	up	336	77	139	431	258	490
AAGAAAGATTGCAAGAACTGCTAATTCATGCTT,mature-mt_tRNA-Ser-GCT_5_end	1.77215	0.00130389	up	255	61	87	492	220	500
AAGAAAGATTGCAAGAACTGCTAATTCATGCTTC,mature-mt_tRNA-Ser-GCT_5_end	1.28691	0.0347479	up	493	80	97	640	238	472
AAGAAAGATTGCAAGAACTGCTAATTCATGCTTCCATGT,mature-mt_tRNA-Ser-GCT_5_end	1.74085	0.00943926	up	35	6	13	55	36	72
AAGAAAGATTGCAAGAACTGCTAATTCATGCTTCCATGTT,mature-mt_tRNA-Ser-GCT_5_end	1.7435	0.00474246	up	143	20	64	273	123	291
AAGAAAGATTGCAAGAACTGCTAATTCATGCTTCCATGTTT,mature-mt_tRNA-Ser-GCT_5_end	1.41069	0.0228927	up	648	98	310	1093	345	1096
AAGAAAGATTGCAAGAACTGCTAATTCATGCTTCCATGTTTA,mature-mt_tRNA-Ser-GCT_5_end	1.68756	0.0078664	up	114	18	42	213	73	207
AAGAAAGATTGCAAGAACTGCTAATTCATGCTTCCATGTTTAA,mature-mt_tRNA-Ser-GCT_5_end	1.71418	0.0325963	up	36	2	14	48	20	85
AAGACTTAAAACCTTGTTCCC,mature-mt_tRNA-Leu-TAA	-2.99091	0.00148297	down	25	22	17	2	5	1
AAGATATTAGTAAAATC,mature-mt_tRNA-Asp-GTC_5_end	-1.52218	0.0222199	down	111	142	57	5	52	51
AAGATATTAGTAAAATCAATTAC,mature-mt_tRNA-Asp-GTC_5_end	-1.26201	0.0207749	down	117	87	41	18	47	32
AAGATATTAGTAAAATCAATTACATAACTTTGTCA,mature-mt_tRNA-Asp-GTC_5_end	1.42928	0.0471556	up	42	7	14	26	34	95
AAGCCCTCTTATTTCTACC,mature-mt_tRNA-Ile-GAT	-1.86129	0.000665035	down	297	164	135	82	38	28
AAGGTTCCGGGTTCGAGTCCCGGCGGAGTCGCCA,mature-tRNA-Arg-TCT_CCA_end	1.36864	0.0396555	up	30	10	8	23	46	45
AAGTTAAAGTTAGAGACCTT,mature-mt_tRNA-Lys-TTT	-1.62001	0.0450715	down	35	61	16	22	8	3
AAGTTAGAGACCTTAAAATCTCCATAGTGACCA,mature-mt_tRNA-Lys-TTT_CCA_end	1.19982	0.0292013	up	68	24	20	84	69	77
AAGTTTAACTTCTGC,mature-mt_tRNA-Trp-TCA	-1.71788	0.0345356	down	43	24	12	12	4	5
AAGTTTAACTTCTGCC,mature-mt_tRNA-Trp-TCA	-2.53169	0.000695783	down	67	76	61	25	4	4
AAGTTTAACTTCTGCCA,mature-mt_tRNA-Trp-TCA_CCA_end	-1.50735	0.00495407	down	184	364	198	114	51	91
AATAATCTATATATCTTACC,mature-mt_tRNA-Asp-GTC	-2.19192	0.00139574	down	92	78	48	26	15	3
AATAATCTATATATCTTACCA,mature-mt_tRNA-Asp-GTC_CCA_end	-1.2988	0.00669213	down	313	491	268	182	116	124
AATAGATGTAGGATGAAG,mature-mt_tRNA-Ala-TGC	-1.37511	0.0378625	down	48	44	23	18	8	15
AATAGATGTAGGATGAAGTCTT,mature-mt_tRNA-Ala-TGC	-1.25515	0.0411646	down	70	34	26	18	17	15
AATATAACTGACTTCCAATTAGTAGATT,mature-mt_tRNA-Gly-TCC	1.76422	0.0105959	up	23	12	15	14	95	64
AATGAACACTCTGAC,mature-mt_tRNA-Val-TAC	-1.30473	0.0337148	down	243	162	110	118	47	21
AATGAACACTCTGACC,mature-mt_tRNA-Val-TAC	-2.47418	2.18432e-07	down	1516	1637	918	295	290	115
AATGAACACTCTGACCA,mature-mt_tRNA-Val-TAC_CCA_end	-1.32411	0.00141938	down	3050	3910	2440	1304	1416	976
AATGAAGATCTTCTCTTCTCAAGACACC,mature-mt_tRNA-Thr-TGT	-1.46082	0.0354212	down	31	39	19	11	9	11
AATGCTGTGTAGAAATACC,mature-mt_tRNA-Glu-TTC	-1.36888	0.00956514	down	316	195	124	108	80	35
AATGCTGTGTAGAAATACCA,mature-mt_tRNA-Glu-TTC_CCA_end	-1.11995	0.0427224	down	193	358	183	165	59	99
AATTAGTAGATTCTGAAT,mature-mt_tRNA-Gly-TCC	-1.51436	0.0284119	down	45	46	28	18	5	16
AATTAGTAGATTCTGAATAAACCCAGAAGAGAGTACCA,mature-mt_tRNA-Gly-TCC_CCA_end	1.43933	0.0159391	up	55	14	31	86	55	114
ACAAAAAACATTAGACTGTGAATCTGACAACAGGA,mature-mt_tRNA-His-GTG	1.49747	0.011811	up	85	14	29	123	89	110
ACAAAAAACATTAGACTGTGAATCTGACAACAGGAA,mature-mt_tRNA-His-GTG	1.51095	0.0329009	up	38	5	10	48	32	52
ACAAAAAACATTAGACTGTGAATCTGACAACAGGAAA,mature-mt_tRNA-His-GTG	1.80297	0.0299179	up	17	3	3	22	19	29
ACAAAAAACATTAGACTGTGAATCTGACAACAGGAAAT,mature-mt_tRNA-His-GTG	1.6826	0.0223234	up	34	3	16	42	33	83
ACAAAAAACATTAGACTGTGAATCTGACAACAGGAAATA,mature-mt_tRNA-His-GTG	2.0732	0.00305683	up	34	8	7	38	37	107
ACAACAGGAAATAAACCTCCTTATTCACCCCA,mature-mt_tRNA-His-GTG_CCA_end	2.60748	0.00059331	up	12	4	5	15	46	62
ACAAGTTTAACTTCTGCC,mature-mt_tRNA-Trp-TCA	-2.08409	0.000132943	down	205	294	221	88	46	32
ACAAGTTTAACTTCTGCCA,mature-mt_tRNA-Trp-TCA_CCA_end	-1.70158	0.00128192	down	481	1218	716	322	168	252
ACACAAGTTTAACTTCTGCC,mature-mt_tRNA-Trp-TCA	-1.28058	0.030306	down	136	96	66	65	26	20
ACACACAAGTTTAACTTCTGC,mature-mt_tRNA-Trp-TCA	-1.80769	0.0321097	down	160	40	63	54	5	4
ACACACAAGTTTAACTTCTGCC,mature-mt_tRNA-Trp-TCA	-1.16503	0.0354794	down	95	104	90	63	30	32
ACACCCAGAAGATTTCATGACC,mature-mt_tRNA-Val-TAC	-1.36314	0.00104839	down	988	814	648	269	443	227
ACACCCAGAAGATTTCATGACCAATGAACACTCTG,mature-mt_tRNA-Val-TAC	1.68903	0.0378541	up	44	3	3	32	57	45
ACACCCAGAAGATTTCATGACCAATGAACACTCTGACC,mature-mt_tRNA-Val-TAC	1.73295	0.00376488	up	168	18	68	206	341	239
ACACCCAGAAGATTTCATGACCAATGAACACTCTGACCA,mature-mt_tRNA-Val-TAC_CCA_end	2.4784	2.88381e-06	up	456	92	199	780	1298	1840
ACACGCAGAAGGTCCTGGGTTCGAGCCCCAGTGGAACCACC,mature-tRNA-Val-TAC	2.63503	0.00773433	up	13	0	1	27	22	23
ACCAATGAACACTCTGACC,mature-mt_tRNA-Val-TAC	-1.01662	0.0333939	down	544	810	409	380	260	195
ACCATCCTCTGCTACC,mature-tRNA-iMet-CAT	-1.37428	0.0287082	down	37	93	37	18	30	17
ACCCAGAAGAGAGTACC,mature-mt_tRNA-Gly-TCC	-1.2858	0.0292893	down	111	130	97	71	46	17
ACCCAGAAGATTTCATGAC,mature-mt_tRNA-Val-TAC	-1.30189	0.0100369	down	104	117	69	44	36	33
ACCCAGAAGATTTCATGACC,mature-mt_tRNA-Val-TAC	-2.12672	6.70204e-07	down	1541	1013	731	276	268	159
ACCCAGAAGATTTCATGACCAATGAACACTCTGACCA,mature-mt_tRNA-Val-TAC_CCA_end	1.9723	6.78265e-05	up	94	33	30	151	182	229
ACCGCCGCGGCCCGGGTTCGATTCCCGGTCAGGGAACCA,mature-tRNA-Glu-TTC_CCA_end;mature-tRNA-Glu-CTC_CCA_end	1.91044	0.043148	up	17	0	11	7	56	44
ACCTGAAATGAAGATCTTCTCTTCTCAAGACACCA,mature-mt_tRNA-Thr-TGT_CCA_end	1.99068	0.000123544	up	98	28	45	159	185	294
ACGCGGGAGACCGGGGTTCGATTCCCCGACGGGGAGCCA,mature-tRNA-Asp-GTC_CCA_end	2.61386	9.13421e-05	up	26	3	9	47	89	80
ACGCGGGAGGCCCGGGTTCGATTCCCGGCCAATGCACCA,mature-tRNA-Gly-GCC_CCA_end	2.04577	0.0149391	up	13	4	6	6	41	46
ACGGAGAATTTTGAATT,mature-mt_tRNA-Gln-TTG	-1.37616	0.0111657	down	102	66	42	24	33	19
ACGTCGGGGTCACCA,mature-tRNA-Trp-CCA_CCA_end	-1.06311	0.0356358	down	774	1087	334	382	193	392
ACTCATTAGATTATGATGATGTTCATAATTACCAACCA,mature-mt_tRNA-Arg-TCG_CCA_end	1.78191	0.0345924	up	13	8	2	15	14	42
ACTCCCTTAGTATAATT,mature-mt_tRNA-Gly-TCC_5_end	-1.05795	0.0449211	down	109	175	103	31	74	85
ACTCCCTTAGTATAATTAATATAACTGACTTCCAATTAGT,mature-mt_tRNA-Gly-TCC_5_end	2.454	0.00148148	up	18	3	9	18	41	99
ACTCTGGACTCTGAATC,mature-tRNA-Gln-CTG	-1.31572	0.0334345	down	65	42	22	15	20	13
ACTTTTATAGGATAAT,mature-mt_tRNA-Leu-TAG_5_end	-2.19308	0.00845642	down	56	40	11	1	14	7
ACTTTTATAGGATAATAGTAATCC,mature-mt_tRNA-Leu-TAG_5_end	-2.03765	0.00374818	down	67	70	17	15	14	5
AGAAAGATTGCAAGAACTGCTAATTCATGCTTCCATGTTT,mature-mt_tRNA-Ser-GCT	1.70804	0.0222855	up	27	8	9	58	13	55
AGAAATATGTCTGAT,mature-mt_tRNA-Ile-GAT_5_end	-1.2008	0.0426718	down	67	136	46	35	22	47
AGAAATATGTCTGATAAAAGAATTACTTTGATA,mature-mt_tRNA-Ile-GAT_5_end	1.13153	0.031723	up	131	46	55	153	97	215
AGAAATATGTCTGATAAAAGAATTACTTTGATAG,mature-mt_tRNA-Ile-GAT_5_end	1.64159	0.0123498	up	25	6	14	37	41	56
AGAAATATGTCTGATAAAAGAATTACTTTGATAGAGTA,mature-mt_tRNA-Ile-GAT_5_end	1.36918	0.0398193	up	42	11	14	38	31	88
AGAACTGCTAATTCATG,mature-mt_tRNA-Ser-GCT	-1.46982	0.0145549	down	97	105	59	50	17	20
AGAAGATTTCATGACC,mature-mt_tRNA-Val-TAC	-1.78288	0.00602987	down	50	33	40	9	18	9
AGAAGGTTGCGTGTTC,mature-tRNA-Trp-CCA	-1.54787	0.0232693	down	123	62	29	39	11	12
AGAAGTTTAGGATATACT,mature-mt_tRNA-Trp-TCA_5_end	-1.1071	0.0452638	down	1245	1614	857	144	927	698
AGAATTCTCGCCTGCC,mature-tRNA-Gly-GCC	-1.68943	0.00413232	down	69	73	47	22	25	10
AGACTGTGAATCTGACAACAGG,mature-mt_tRNA-His-GTG	-1.78863	0.0234563	down	34	21	16	9	5	5
AGACTTAAAACCTTGTTCCC,mature-mt_tRNA-Leu-TAA	-1.42827	0.0233862	down	69	42	30	14	27	9
AGAGCCAGGAAATTGC,mature-mt_tRNA-Leu-TAA	-2.13217	0.0104092	down	39	13	18	5	6	4
AGAGTAAATTATAGAGGTTC,mature-mt_tRNA-Ile-GAT	-1.72504	0.000187019	down	241	159	105	34	56	55
AGATGTAGGATGAAG,mature-mt_tRNA-Ala-TGC	-1.67388	0.0428931	down	23	33	9	7	5	7
AGATGTAGGATGAAGTC,mature-mt_tRNA-Ala-TGC	-1.31519	0.0218317	down	75	81	41	34	19	21
AGATGTAGGATGAAGTCTT,mature-mt_tRNA-Ala-TGC	-1.14092	0.0259917	down	138	134	72	65	48	33
AGATTGCAAGAACTGC,mature-mt_tRNA-Ser-GCT	-1.69341	0.0408601	down	29	29	11	4	4	12
AGCACTCTGGACTCTGAATCC,mature-tRNA-Gln-CTG	-1.39292	0.0420488	down	139	54	15	23	33	12
AGCCCTAAGAAAACACACAAGTTTAACTTCTGCCA,mature-mt_tRNA-Trp-TCA_CCA_end	2.7647	0.000845609	up	6	2	5	25	19	42
AGCTCAGTCGGTAGAGC,mature-tRNA-Lys-TTT;mature-tRNA-Lys-CTT	-1.83366	0.0446079	down	21	30	8	9	3	3
AGCTCAGTGGTAGAGCATTTGACTGC,mature-tRNA-Cys-GCA	-1.77762	0.00513731	down	79	55	31	11	27	8
AGCTCCTTCTTCTTGACC,mature-mt_tRNA-Pro-TGG	-1.392	0.0126563	down	112	99	57	47	21	26
AGGAAATTGCGTAAGACTT,mature-mt_tRNA-Leu-TAA	-1.67241	0.0186027	down	53	29	17	7	15	7
AGGAGATCCTGGGTTC,mature-tRNA-Thr-TGT;mature-tRNA-Thr-CGT;mature-tRNA-Thr-AGT	-1.17709	0.0385621	down	170	78	52	58	35	24
AGGATGAAGTCTTACAGTCCTTACCA,mature-mt_tRNA-Ala-TGC_CCA_end	-1.49787	0.042537	down	28	34	15	8	7	11
AGGATTCGGCGCTCTC,mature-tRNA-Glu-CTC	-1.31661	0.00317281	down	2095	1196	1240	407	973	423
AGTAAGGTCAGCTAATTA,mature-mt_tRNA-Met-CAT_5_end	-1.05103	0.0257415	down	151	211	122	83	80	66
AGTAAGGTCAGCTAATTAAGCTATCGGGCC,mature-mt_tRNA-Met-CAT_5_end	-1.82367	0.000365506	down	940	296	483	191	177	86
AGTAAGGTCAGCTAATTAAGCTATCGGGCCCATACCCCG,mature-mt_tRNA-Met-CAT_5_end	1.56822	0.0478696	up	14	7	3	15	22	28
AGTAAGGTCAGCTAATTAAGCTATCGGGCCCATACCCCGA,mature-mt_tRNA-Met-CAT_5_end	2.07278	0.00598771	up	15	5	5	33	18	44
AGTAAGGTCAGCTAATTAAGCTATCGGGCCCATACCCCGAA,mature-mt_tRNA-Met-CAT_5_end	2.30484	0.0038308	up	9	3	8	33	15	48
AGTAATAGGGTATTTA,mature-mt_tRNA-Asn-GTT	1.83727	0.0259344	up	3	9	6	22	27	17
AGTAATAGGGTATTTAGCTGTTAACT,mature-mt_tRNA-Asn-GTT	1.35997	0.00790483	up	115	42	27	111	175	139
AGTAATAGGGTATTTAGCTGTTAACTA,mature-mt_tRNA-Asn-GTT	2.26829	0.00114319	up	13	6	5	25	49	36
AGTAATAGGGTATTTAGCTGTTAACTAA,mature-mt_tRNA-Asn-GTT	2.47938	0.000507358	up	13	4	5	30	54	32
AGTAATAGGGTATTTAGCTGTTAACTAAA,mature-mt_tRNA-Asn-GTT	2.3109	8.03164e-05	up	22	16	11	38	117	84
AGTAATAGGGTATTTAGCTGTTAACTAAAT,mature-mt_tRNA-Asn-GTT	2.33815	8.08924e-06	up	269	74	114	317	993	905
AGTAATAGGGTATTTAGCTGTTAACTAAATT,mature-mt_tRNA-Asn-GTT	2.43204	1.25351e-05	up	121	26	52	156	423	446
AGTAATAGGGTATTTAGCTGTTAACTAAATTT,mature-mt_tRNA-Asn-GTT	2.33224	0.0037319	up	25	2	3	22	59	51
AGTAATAGGGTATTTAGCTGTTAACTAAATTTT,mature-mt_tRNA-Asn-GTT	2.37256	0.00520874	up	33	1	4	33	34	98
AGTAATAGGGTATTTAGCTGTTAACTAAATTTTC,mature-mt_tRNA-Asn-GTT	2.1868	0.000798189	up	50	8	10	67	68	135
AGTAATAGGGTATTTAGCTGTTAACTAAATTTTCGT,mature-mt_tRNA-Asn-GTT	2.59504	0.00297584	up	13	1	3	14	29	50
AGTAATAGGGTATTTAGCTGTTAACTAAATTTTCGTA,mature-mt_tRNA-Asn-GTT	2.52973	0.00336419	up	17	1	7	13	33	90
AGTAATAGGGTATTTAGCTGTTAACTAAATTTTCGTAG,mature-mt_tRNA-Asn-GTT	3.12889	0.000666951	up	10	1	2	9	35	60
AGTAATCCATTGGTCTT,mature-mt_tRNA-Leu-TAG	-1.50114	0.00505437	down	244	274	115	108	50	46
AGTAATCCATTGGTCTTAGGAACC,mature-mt_tRNA-Leu-TAG	-1.69127	0.0358027	down	21	22	16	5	6	7
AGTAGATTCTGAATAAAC,mature-mt_tRNA-Gly-TCC	-1.96998	0.0168691	down	20	19	22	4	7	5
AGTAGCTCCTTCTTCTTGACC,mature-mt_tRNA-Pro-TGG	-1.37064	0.0309394	down	43	45	23	14	15	12
AGTATAAACATTACTCTGGTCTTGTAAACCTGAAAT,mature-mt_tRNA-Thr-TGT	2.31532	0.0138595	up	25	2	3	4	59	69
AGTATAAACATTACTCTGGTCTTGTAAACCTGAAATG,mature-mt_tRNA-Thr-TGT	3.29778	0.00161049	up	4	1	2	4	30	34
AGTATAGTGGTGAGTATCCCCGCCTGTCA,mature-tRNA-Asp-GTC	2.25134	0.00180094	up	24	18	16	11	142	130
AGTATAGTGGTGAGTATCCCCGCCTGTCACG,mature-tRNA-Asp-GTC	2.44379	0.000982879	up	28	9	23	14	160	167
AGTCGGTAGAGCATG,mature-tRNA-Lys-CTT	-2.10615	0.0216489	down	12	25	19	7	2	4
AGTGGTAGAATTCTCGCCTGC,mature-tRNA-Gly-GCC	-1.34038	0.0326879	down	1289	552	332	486	99	128
AGTGGTAGAATTCTCGCCTGCC,mature-tRNA-Gly-GCC	-1.33564	0.00205009	down	6095	4551	3256	2320	1506	1294
AGTGGTAGAGCATTTGACTGC,mature-tRNA-Cys-GCA	-1.38048	0.022492	down	461	256	92	156	45	59
AGTGGTTAGGATTCGGCGCTCTCACC,mature-tRNA-Glu-CTC	1.77803	0.0114422	up	12	10	9	16	58	34
AGTGGTTATCACGTTCGCCT,mature-tRNA-Val-CAC;mature-tRNA-Val-AAC	-1.68195	0.00638129	down	84	78	44	33	14	12
AGTGTAGTGGTTATCACGTTCGCCT,mature-tRNA-Val-CAC;mature-tRNA-Val-AAC	-1.34863	0.0151373	down	231	118	49	60	45	31
AGTTAAAGTTAGAGACCTTAAAATCTCCATAGTGACCA,mature-mt_tRNA-Lys-TTT_CCA_end	1.71512	0.0366277	up	12	8	2	18	16	31
AGTTAGAGACCTTAAAATCTCCATAGTGACCA,mature-mt_tRNA-Lys-TTT_CCA_end	1.23901	0.00758251	up	152	64	66	203	177	236
AGTTGAATGCTGTGTAGAAATACC,mature-mt_tRNA-Glu-TTC	-1.30548	0.0497395	down	462	143	72	136	64	24
AGTTTACAAAAAACATTAGACTGTGAATCTGACAACAGGA,mature-mt_tRNA-His-GTG	2.19839	0.034173	up	11	0	3	6	22	31
ATAACTGACTTCCAATTAGTAGATTCTGAATAAACC,mature-mt_tRNA-Gly-TCC	2.03807	0.00837493	up	18	3	7	20	27	60
ATAATTAATATAACTGACTTCC,mature-mt_tRNA-Gly-TCC	-1.81545	0.0244824	down	49	16	18	10	3	8
ATAATTAATATAACTGACTTCCAATTAGTAGATT,mature-mt_tRNA-Gly-TCC	2.20598	0.00690232	up	9	5	3	17	18	38
ATAGGATAATAGTAATCCATTGGTCTT,mature-mt_tRNA-Leu-TAG	-1.7799	0.0336006	down	19	30	13	4	10	4
ATAGTAATCCATTGGTC,mature-mt_tRNA-Leu-TAG	-1.81541	0.0191753	down	22	56	13	8	9	8
ATAGTGGTTAGTACTCTGCGTTGT,mature-tRNA-His-GTG	-1.97251	0.0170712	down	54	34	9	12	3	6
ATATAACTGACTTCCAATTAGTAGATTCTGAATA,mature-mt_tRNA-Gly-TCC	1.69676	0.00284133	up	79	17	24	106	96	146
ATATTAAAGCATCTGGCC,mature-mt_tRNA-Val-TAC	-2.06856	0.0187888	down	16	27	15	2	5	7
ATCCCACTTCTGACACC,mature-tRNA-Leu-CAG;mature-tRNA-Leu-CAA	-1.58758	0.0220807	down	54	59	38	11	35	5
ATCCTTCCCGTACTACC,mature-mt_tRNA-Met-CAT	-2.67309	0.00416669	down	24	30	15	7	1	2
ATCTCGGTGGAACCTCCA,mature-tRNA-Gln-CTG_CCA_end	-1.03731	0.0301524	down	567	849	329	146	338	355
ATGACCAATGAACACTCT,mature-mt_tRNA-Val-TAC	-1.05282	0.0247403	down	682	412	286	285	174	144
ATGACCAATGAACACTCTGA,mature-mt_tRNA-Val-TAC_3_end	-1.79928	0.0187543	down	367	59	42	71	11	22
ATGTCATTGGTCGCAGT,mature-mt_tRNA-Glu-TTC	-1.29831	0.0195366	down	60	101	72	37	28	30
ATGTCATTGGTCGCAGTT,mature-mt_tRNA-Glu-TTC	-1.08386	0.0463836	down	119	183	101	92	46	44
ATGTCATTGGTCGCAGTTG,mature-mt_tRNA-Glu-TTC	-1.01433	0.0305782	down	144	215	144	76	84	90
ATGTCATTGGTCGCAGTTGAATGCTGTGTAGAAATACCA,mature-mt_tRNA-Glu-TTC_CCA_end	1.6207	0.000656055	up	4395	1218	2117	5402	7225	9866
ATGTCTGCGTGGGTTCGAACCCCACT,mature-tRNA-Leu-TAA	-1.70938	0.0198705	down	34	88	13	14	14	11
ATTAAAGCAATTGATTTGCATTCAATAGATGTAGGATG,mature-mt_tRNA-Ala-TGC	1.74639	0.0172392	up	27	8	5	34	21	62
ATTAAAGCATCTGGCC,mature-mt_tRNA-Val-TAC	-2.10339	0.0333376	down	14	35	13	8	6	0
ATTAAAGCATCTGGCCT,mature-mt_tRNA-Val-TAC	-2.14752	0.0103844	down	36	88	31	25	2	5
ATTAAAGCATCTGGCCTAC,mature-mt_tRNA-Val-TAC	-3.36798	5.88771e-08	down	155	142	36	11	9	9
ATTAATATAACTGACTTCCAATTAGTAGATT,mature-mt_tRNA-Gly-TCC	1.21117	0.0412254	up	26	16	17	30	48	56
ATTAGTAGATTCTGAATAAACCCAGAAGAGAGTACCA,mature-mt_tRNA-Gly-TCC_CCA_end	2.03047	0.000465741	up	67	16	20	133	81	158
ATTATAGAGGTTCAAGCCCTCTTATTTCTACCA,mature-mt_tRNA-Ile-GAT_CCA_end	2.35196	0.02247	up	9	5	0	30	5	24
ATTCAATAGATGTAGGATG,mature-mt_tRNA-Ala-TGC	-1.08794	0.0315746	down	237	222	118	124	70	56
ATTCAATAGATGTAGGATGAAG,mature-mt_tRNA-Ala-TGC	-1.53725	0.00529709	down	84	76	48	24	30	15
ATTCAATAGATGTAGGATGAAGT,mature-mt_tRNA-Ala-TGC	-1.09816	0.0156947	down	256	167	141	85	65	99
ATTGGTCGCAGTTGAATGCTGTGTAGAA,mature-mt_tRNA-Glu-TTC	-1.05607	0.0472605	down	103	70	76	49	28	38
ATTGGTCTTAGGAACCAAAAACCTTGGTGC,mature-mt_tRNA-Leu-TAG	-1.96303	0.023222	down	161	17	24	1	27	18
CAAAAAACATTAGACTGTGAATCTGACAA,mature-mt_tRNA-His-GTG	1.24359	0.0188568	up	155	74	61	81	338	244
CAAAAAACATTAGACTGTGAATCTGACAACAGG,mature-mt_tRNA-His-GTG	1.31206	0.00205302	up	160	91	100	263	291	288
CAAAAAACATTAGACTGTGAATCTGACAACAGGA,mature-mt_tRNA-His-GTG	1.49753	0.00345137	up	735	155	233	1064	792	944
CAAAAAACATTAGACTGTGAATCTGACAACAGGAA,mature-mt_tRNA-His-GTG	2.14104	0.000212141	up	295	47	68	542	330	674
CAAAAAACATTAGACTGTGAATCTGACAACAGGAAA,mature-mt_tRNA-His-GTG	1.96098	0.000354113	up	186	37	52	264	242	442
CAAAAAACATTAGACTGTGAATCTGACAACAGGAAAT,mature-mt_tRNA-His-GTG	2.27286	5.74623e-05	up	261	58	75	595	280	783
CAAAAAACATTAGACTGTGAATCTGACAACAGGAAATA,mature-mt_tRNA-His-GTG	2.37611	3.89221e-05	up	352	54	89	578	523	1145
CAAAAAACATTAGACTGTGAATCTGACAACAGGAAATAA,mature-mt_tRNA-His-GTG	2.42861	0.00582389	up	16	1	2	26	21	40
CAAAAAACATTAGACTGTGAATCTGACAACAGGAAATAAA,mature-mt_tRNA-His-GTG	2.70229	0.00124842	up	11	0	7	33	29	50
CAAAAACCTTGGTGCAAATCCAAATAAAAGTACCA,mature-mt_tRNA-Leu-TAG_CCA_end	1.89069	0.00103437	up	294	56	69	294	327	742
CAAAGCAAAGCACTG,mature-mt_tRNA-Phe-GAA	-1.35693	0.0370276	down	29	83	52	27	16	22
CAAAGGTTCCGGGTTCGAGTCCCGGCGGAGTCGCCA,mature-tRNA-Arg-TCT_CCA_end	2.09602	0.00284413	up	34	7	17	20	102	121
CAAAGTTAAATTATAGATCAATAATCTATA,mature-mt_tRNA-Asp-GTC	1.17223	0.0302902	up	90	36	22	112	78	103
CAAAGTTAAATTATAGATCAATAATCTATATA,mature-mt_tRNA-Asp-GTC	1.80543	0.0163551	up	62	11	3	85	41	86
CAAAGTTAAATTATAGATCAATAATCTATATAT,mature-mt_tRNA-Asp-GTC	2.01998	0.0342873	up	18	4	0	27	12	33
CAAAGTTAAATTATAGATCAATAATCTATATATC,mature-mt_tRNA-Asp-GTC	1.5659	0.0282426	up	29	5	7	38	35	34
CAAATCCGGGTGCCCCCTCCA,mature-tRNA-Cys-GCA_CCA_end	1.69813	0.0374401	up	7	3	10	18	30	20
CAAATCTCGGTGGAACCTC,mature-tRNA-Gln-CTG	-1.12506	0.0176587	down	404	290	214	61	201	149
CAAATTCGAAGGTGTAGAGAAATCTCTACTAAGA,mature-mt_tRNA-Cys-GCA	1.45287	0.0186637	up	144	22	22	148	115	168
CAAATTCGAAGGTGTAGAGAAATCTCTACTAAGACTTCC,mature-mt_tRNA-Cys-GCA	1.47352	0.0403442	up	74	11	14	125	32	68
CAAATTCGAAGGTGTAGAGAAATCTCTACTAAGACTTCCA,mature-mt_tRNA-Cys-GCA_CCA_end	1.96207	0.0006722	up	57	19	24	112	66	179
CAACAGGAAATAAACCTCCTTATTCACCCCA,mature-mt_tRNA-His-GTG_CCA_end	2.32388	1.49281e-05	up	101	25	40	165	231	377
CAAGAACTGCTAATTC,mature-mt_tRNA-Ser-GCT	-1.3376	0.0271608	down	83	88	67	51	17	21
CAAGAACTGCTAATTCATGCTTCCATGTTTA,mature-mt_tRNA-Ser-GCT	1.08404	0.036264	up	81	35	44	123	78	116
CAAGAAGTAGTTTAATTAGAATACCAGCT,mature-mt_tRNA-Pro-TGG_5_end	1.20606	0.0284685	up	4315	3952	4219	2588	17302	10832
CAAGAAGTAGTTTAATTAGAATACCAGCTT,mature-mt_tRNA-Pro-TGG_5_end	1.19955	0.0238418	up	1035	774	863	613	3489	2324
CAAGAAGTAGTTTAATTAGAATACCAGCTTTG,mature-mt_tRNA-Pro-TGG_5_end	1.75392	0.00307112	up	1092	559	705	496	4619	3058
CAAGAAGTAGTTTAATTAGAATACCAGCTTTGG,mature-mt_tRNA-Pro-TGG_5_end	1.75329	0.00525715	up	292	93	179	114	856	952
CAAGGTCGCGGGTTCGATCCCCGTACGGGCCACCA,mature-tRNA-Ile-AAT_CCA_end	2.00225	0.0365167	up	15	1	3	6	29	34
CAATAGATGTAGGATGAAGTCTTACAGTCCTTACCA,mature-mt_tRNA-Ala-TGC_CCA_end	1.16565	0.0289175	up	210	54	102	237	170	356
CAATGAACACTCTGACC,mature-mt_tRNA-Val-TAC	-1.15047	0.0193545	down	5422	8183	4479	3897	2282	1620
CAATTACATAACTTTGTCAAAGTTAAATTATAGATCAAT,mature-mt_tRNA-Asp-GTC	1.67973	0.0224232	up	37	9	11	64	15	80
CAATTAGTAGATTCTGAATAAACCCAGAAGAGAGT,mature-mt_tRNA-Gly-TCC	1.29122	0.0268608	up	707	93	143	779	561	602
CAATTAGTAGATTCTGAATAAACCCAGAAGAGAGTACC,mature-mt_tRNA-Gly-TCC	1.49702	0.0156384	up	1528	154	374	2230	1069	1578
CAATTAGTAGATTCTGAATAAACCCAGAAGAGAGTACCA,mature-mt_tRNA-Gly-TCC_CCA_end	2.36262	1.09372e-05	up	880	219	348	1990	1232	3529
CAATTGATTTGCATTCAATAGATGTAGGATGA,mature-mt_tRNA-Ala-TGC	1.54456	0.00250587	up	35	27	29	70	91	103
CAATTGATTTGCATTCAATAGATGTAGGATGAAG,mature-mt_tRNA-Ala-TGC	1.45309	0.0347318	up	14	11	10	32	20	40
CAATTGATTTGCATTCAATAGATGTAGGATGAAGT,mature-mt_tRNA-Ala-TGC	1.56907	0.00633354	up	104	24	32	137	88	196
CACAGAGGTTTAAATCCTCTTTTTACCACC,mature-mt_tRNA-Tyr-GTA	1.25436	0.0472122	up	141	23	23	164	85	120
CACAGAGGTTTAAATCCTCTTTTTACCACCA,mature-mt_tRNA-Tyr-GTA_CCA_end	1.89361	0.000384225	up	186	83	67	366	175	583
CACCCAGAAGATTTCATGACCAATGAACACTCTGACC,mature-mt_tRNA-Val-TAC	1.55356	0.00802102	up	144	19	61	222	189	189
CACCCAGAAGATTTCATGACCAATGAACACTCTGACCA,mature-mt_tRNA-Val-TAC_CCA_end	2.16471	1.84266e-05	up	426	107	219	726	995	1495
CACCGCCGCGGCCCGGGTTCGATTCCCGGTCAGGGAACCA,mature-tRNA-Glu-TTC_CCA_end;mature-tRNA-Glu-CTC_CCA_end	2.44463	0.00514864	up	18	2	1	18	51	30
CACGCAGAAGGTCCTGGGTTCGAGCCCCAGTGGAACCACC,mature-tRNA-Val-TAC	2.57832	0.00111802	up	8	2	5	26	28	32
CACGCATGGGTTCGAATCCCATCCTCGTCGCCA,mature-tRNA-Ser-GCT_CCA_end	1.66149	0.00961903	up	69	29	34	26	192	195
CACGCGGGAGACCGGGGTTCGATTCCCCGACGGGG,mature-tRNA-Asp-GTC	1.75716	0.0498485	up	21	1	7	51	17	16
CACGCGGGAGACCGGGGTTCGATTCCCCGACGGGGAGC,mature-tRNA-Asp-GTC	2.65179	0.00448342	up	16	1	2	60	14	22
CACGCGGGAGACCGGGGTTCGATTCCCCGACGGGGAGCC,mature-tRNA-Asp-GTC	2.07287	0.00261414	up	58	7	8	106	62	86
CACGCGGGAGACCGGGGTTCGATTCCCCGACGGGGAGCCA,mature-tRNA-Asp-GTC_CCA_end	2.58634	0.000100274	up	41	4	11	86	75	136
CACGCGGGAGGCCCGGGTTCGATTCCCGGCCAATGCACCA,mature-tRNA-Gly-GCC_CCA_end	1.86743	0.0395345	up	14	2	3	11	16	35
CACGGAGAATTTTGAATT,mature-mt_tRNA-Gln-TTG	-1.57919	0.0103393	down	43	63	40	16	22	11
CACGGAGAATTTTGAATTCT,mature-mt_tRNA-Gln-TTG	-2.09916	0.00400313	down	54	64	16	15	6	7
CACTATGAAGCTAAGAGCGTTAACCTTTTA,mature-mt_tRNA-Lys-TTT_5_end	2.2087	0.0127789	up	6	3	5	7	30	29
CACTATGAAGCTAAGAGCGTTAACCTTTTAAGT,mature-mt_tRNA-Lys-TTT_5_end	2.42741	0.0026415	up	7	4	7	10	41	49
CAGAAGATTGAGGGTTCGAATCCCTTCGTGGTTGCCA,mature-tRNA-Arg-TCG_CCA_end	2.34437	0.0190729	up	12	7	6	0	45	81
CAGAAGATTGCAGGTTCGAGTCCTGCCGCGGTCGCCA,mature-tRNA-Arg-TCG_CCA_end	2.73727	0.00442567	up	10	1	4	4	34	58
CAGAAGATTTCATGACC,mature-mt_tRNA-Val-TAC	-1.20423	0.0109216	down	264	344	294	101	204	102
CAGAAGATTTCATGACCAATGAACACTCTGACCA,mature-mt_tRNA-Val-TAC_CCA_end	1.66043	0.00014452	up	307	132	176	445	790	660
CAGAGGTTTAAATCCTCTTTTTACCACCA,mature-mt_tRNA-Tyr-GTA_CCA_end	1.92995	0.000332345	up	363	108	89	595	344	915
CAGGAAATAAACCTCCTTATTCACCCCA,mature-mt_tRNA-His-GTG_CCA_end	1.17806	0.00442007	up	453	365	246	482	896	965
CAGTAATAGGGTATTTAGCTGTTAACT,mature-mt_tRNA-Asn-GTT	2.01095	0.000168223	up	48	16	20	78	113	127
CAGTAATAGGGTATTTAGCTGTTAACTAA,mature-mt_tRNA-Asn-GTT	3.40407	0.000243131	up	3	1	3	17	28	29
CAGTAATAGGGTATTTAGCTGTTAACTAAA,mature-mt_tRNA-Asn-GTT	2.68653	8.26859e-05	up	4	11	9	36	64	62
CAGTAATAGGGTATTTAGCTGTTAACTAAAT,mature-mt_tRNA-Asn-GTT	2.89238	2.20323e-09	up	106	43	56	256	666	567
CAGTAATAGGGTATTTAGCTGTTAACTAAATT,mature-mt_tRNA-Asn-GTT	2.84989	2.22806e-07	up	53	17	16	97	215	263
CAGTAATAGGGTATTTAGCTGTTAACTAAATTT,mature-mt_tRNA-Asn-GTT	3.40334	0.000227258	up	1	3	3	20	25	31
CAGTAATAGGGTATTTAGCTGTTAACTAAATTTT,mature-mt_tRNA-Asn-GTT	3.04585	0.000401149	up	7	1	3	28	21	35
CAGTAATAGGGTATTTAGCTGTTAACTAAATTTTC,mature-mt_tRNA-Asn-GTT	2.81161	0.00279645	up	8	2	2	6	29	44
CAGTCGGTAGAGCATC,mature-tRNA-Lys-TTT	-1.48148	0.0147326	down	46	80	42	21	14	24
CAGTCGGTAGAGCATGGGACTCTTAATC,mature-tRNA-Lys-CTT	1.6091	0.0464088	up	6	7	6	21	17	19
CAGTGGTAGAATTCTCGCCTGCC,mature-tRNA-Gly-GCC	-1.26474	0.00130301	down	8573	7709	7666	2812	3805	3436
CAGTGGTAGAATTCTCGCCTGCCACGCGGGAG,mature-tRNA-Gly-GCC	2.65202	0.00738469	up	9	2	3	2	42	41
CAGTGGTAGAATTCTCGCCTGCCACGCGGGAGG,mature-tRNA-Gly-GCC	1.53753	0.018171	up	69	24	50	29	212	187
CAGTGGTAGAGCATTTGACTGC,mature-tRNA-Cys-GCA	-1.05982	0.0204937	down	335	310	345	179	183	117
CATATAGGATATGAG,mature-mt_tRNA-Ser-TGA	-1.54064	0.0441818	down	17	35	23	9	6	11
CATATAGGATATGAGATTG,mature-mt_tRNA-Ser-TGA	-1.48799	0.0248665	down	52	73	44	32	8	17
CATGACCAATGAACACTCTG,mature-mt_tRNA-Val-TAC	-1.67937	0.0161761	down	57	32	20	10	6	15
CATGACCAATGAACACTCTGA,mature-mt_tRNA-Val-TAC_3_end	-1.34013	0.0217837	down	222	121	77	85	29	31
CATGCTTCCATGTTTAAAAACATGGCTTTCTTACCA,mature-mt_tRNA-Ser-GCT_CCA_end	1.79223	0.00291758	up	47	15	16	94	46	101
CATGGGTTCGAATCCCATCCTCGTCGCCA,mature-tRNA-Ser-GCT_CCA_end	1.34245	0.034849	up	60	46	48	25	235	149
CATGTCATTGGTCGCAGTTGAATGCTGTGTAGAA,mature-mt_tRNA-Glu-TTC	1.13402	0.0140784	up	248	107	186	397	363	402
CATGTCATTGGTCGCAGTTGAATGCTGTGTAGAAA,mature-mt_tRNA-Glu-TTC	1.34001	0.00456942	up	112	45	62	163	170	195
CATGTCATTGGTCGCAGTTGAATGCTGTGTAGAAAT,mature-mt_tRNA-Glu-TTC	1.86944	0.000453047	up	247	44	112	372	459	546
CATGTCATTGGTCGCAGTTGAATGCTGTGTAGAAATA,mature-mt_tRNA-Glu-TTC_3_end	1.34273	0.037882	up	299	28	47	304	193	283
CATGTCATTGGTCGCAGTTGAATGCTGTGTAGAAATAC,mature-mt_tRNA-Glu-TTC	1.54049	0.0278856	up	337	27	49	512	170	272
CATGTCATTGGTCGCAGTTGAATGCTGTGTAGAAATACC,mature-mt_tRNA-Glu-TTC	1.6108	0.0170373	up	1699	118	282	2546	1116	1504
CATGTCATTGGTCGCAGTTGAATGCTGTGTAGAAATACCA,mature-mt_tRNA-Glu-TTC_CCA_end	2.71388	5.07644e-08	up	1587	445	732	4299	4149	8480
CATTAGACTGTGAATCTGACAACAGGAAATAAACC,mature-mt_tRNA-His-GTG	1.80613	0.00419397	up	80	10	23	137	83	124
CATTAGATTATGATGATGTTCATAATTACCAACCA,mature-mt_tRNA-Arg-TCG_CCA_end	1.63881	0.000636353	up	64	36	37	116	122	171
CATTCAATAGATGTAGGATGAAGTCTTAC,mature-mt_tRNA-Ala-TGC	1.673	0.0193569	up	19	3	15	34	45	38
CATTCAATAGATGTAGGATGAAGTCTTACAGTCCTTACCA,mature-mt_tRNA-Ala-TGC_CCA_end	1.85374	0.00114443	up	219	50	88	462	185	506
CATTGGTCGCAGTTGAATGCTGTGTAGAAATACCA,mature-mt_tRNA-Glu-TTC_CCA_end	1.12704	0.00554176	up	691	336	350	768	1022	1077
CCAAAAACCTTGGTGCAAATCCAAATAAAAGTACCA,mature-mt_tRNA-Leu-TAG_CCA_end	1.97552	0.00189981	up	102	13	34	115	118	296
CCAATGAACACTCTG,mature-mt_tRNA-Val-TAC	-1.81179	0.0452569	down	18	20	19	6	1	9
CCAATTAGTAGATTCTGAATAAACCCAGAA,mature-mt_tRNA-Gly-TCC	1.14501	0.0436659	up	72	16	37	82	101	79
CCAATTAGTAGATTCTGAATAAACCCAGAAGAGAGT,mature-mt_tRNA-Gly-TCC	1.53092	0.0195341	up	288	23	39	279	268	287
CCAATTAGTAGATTCTGAATAAACCCAGAAGAGAGTACC,mature-mt_tRNA-Gly-TCC	1.57948	0.0163029	up	702	53	147	1033	480	714
CCAATTAGTAGATTCTGAATAAACCCAGAAGAGAGTACCA,mature-mt_tRNA-Gly-TCC_CCA_end	2.43344	1.10492e-05	up	392	79	182	805	732	1751
CCAGAAGATTTCATGACC,mature-mt_tRNA-Val-TAC	-1.13479	0.0152617	down	186	235	127	61	118	69
CCAGAAGATTTCATGACCAATGAACACTCTGACCA,mature-mt_tRNA-Val-TAC_CCA_end	1.45294	0.00105735	up	147	76	108	277	319	295
CCAGCGGTGCCTCCA,mature-tRNA-Thr-AGT_CCA_end	-1.26651	0.025334	down	88	209	70	28	60	65
CCATCTGGGGTGCCA,mature-tRNA-Arg-CCT_CCA_end	-1.24671	0.0164821	down	106	218	104	64	52	62
CCATTGGTCTTAGGAAC,mature-mt_tRNA-Leu-TAG	-1.93963	0.019376	down	20	29	23	4	3	12
CCCACGTTGGGCGCC,mature-tRNA-Lys-CTT	-1.14958	0.0311146	down	131	391	214	118	108	113
CCCACTTCTGACACC,mature-tRNA-Leu-CAG;mature-tRNA-Leu-CAA	-1.25591	0.0172893	down	323	586	321	70	283	185
CCCAGAAGATTTCATGACCAAT,mature-mt_tRNA-Val-TAC	1.29307	0.03461	up	24	21	35	32	86	92
CCCAGAAGATTTCATGACCAATGAACACTCTGACC,mature-mt_tRNA-Val-TAC	1.56199	0.00230855	up	986	187	391	1238	1829	1211
CCCAGAAGATTTCATGACCAATGAACACTCTGACCA,mature-mt_tRNA-Val-TAC_CCA_end	2.15654	8.71667e-06	up	2403	819	1653	4023	8743	9002
CCCAGAGGTTCAAATCCTCTCCCTAATACCA,mature-mt_tRNA-Leu-TAA_CCA_end	1.00395	0.0152996	up	507	420	446	756	885	1120
CCCAGTGGAACCACC,mature-tRNA-Val-TAC	-1.49764	0.0122039	down	49	44	56	17	20	17
CCCATCCTCGTCGCC,mature-tRNA-Ser-GCT	-1.24134	0.0134872	down	333	882	441	169	306	250
CCCCAGTGGAACCACC,mature-tRNA-Val-TAC	-1.58274	0.033324	down	29	26	18	5	11	8
CCCGAAAACGTTGGTTTAAATCCTTCCCGTACTACCA,mature-mt_tRNA-Met-CAT_CCA_end	2.16861	0.0176905	up	15	0	7	13	28	53
CCCGGCATCTCCACC,mature-tRNA-Ala-TGC;mature-tRNA-Ala-CGC	-1.47128	0.0176991	down	71	122	75	9	45	47
CCCTAAGAAAACACACAAGTTTAACTTCTGCCA,mature-mt_tRNA-Trp-TCA_CCA_end	1.68275	0.000600873	up	73	33	41	112	144	198
CCGAAAACGTTGGTTTAAATCCTTCCCGTACTACCA,mature-mt_tRNA-Met-CAT_CCA_end	3.06075	4.41641e-05	up	15	3	4	22	57	91
CCGAGTCACGGCACC,mature-tRNA-His-GTG	-2.54613	0.00455744	down	15	20	26	3	3	5
CCGCCGCGGCCCGGGTTCGATTCCCGGTCAGGGAACCA,mature-tRNA-Glu-TTC_CCA_end;mature-tRNA-Glu-CTC_CCA_end	1.7907	0.0278568	up	26	3	9	9	61	55
CCGCGGCCCGGGTTCGATTCCCGGTCAGGGAACCA,mature-tRNA-Glu-TTC_CCA_end;mature-tRNA-Glu-CTC_CCA_end	2.57773	0.000454295	up	13	11	24	17	170	135
CCGGCTCGAAGGACC,mature-tRNA-Tyr-GTA	-1.42915	0.0226476	down	45	99	46	12	40	21
CCGGTTCGAAACCGGGCGGAAACA,mature-tRNA-Val-CAC_3_end;mature-tRNA-Val-AAC_3_end;mature-tRNA-Gly-ACC_3_end	-2.15985	0.00360195	down	331	48	36	6	38	36
CCGTAGTGTAGTGGTTATC,mature-tRNA-Val-CAC;mature-tRNA-Val-AAC	-1.53289	0.0208456	down	106	66	21	29	20	9
CCGTAGTGTAGTGGTTATCACGTTCGCCTCACACGCGAAAGG,mature-tRNA-Val-CAC	2.68626	0.00453415	up	9	2	3	4	33	49
CCTAAGAAAACACACAAGTTTAACTTCTGCCA,mature-mt_tRNA-Trp-TCA_CCA_end	1.26652	0.0050604	up	180	105	98	247	227	402
CCTGAAATGAAGATCTTCTCTTCTCAAGACACCA,mature-mt_tRNA-Thr-TGT_CCA_end	1.81411	0.000124138	up	688	198	347	1055	1327	1733
CCTGCCGACTACGCCA,mature-tRNA-Ser-TGA_CCA_end;mature-tRNA-Ser-AGA_CCA_end	-1.52357	0.0134947	down	56	71	55	8	35	23
CCTGCTCGCTGCGCC,mature-tRNA-Ser-TGA	-1.97652	0.0400489	down	11	22	25	1	3	12
CCTTCGATAGCTCAG,mature-tRNA-Tyr-GTA_5_end	-1.99339	0.00150534	down	48	108	44	11	26	14
CCTTCGATAGCTCAGC,mature-tRNA-Tyr-GTA_5_end	-1.86819	0.00617731	down	33	105	41	22	10	16
CCTTGTTCCCAGAGGTTCAAATCCTCTCCCTAATACC,mature-mt_tRNA-Leu-TAA	1.80055	0.0104923	up	30	4	10	49	34	54
CCTTGTTCCCAGAGGTTCAAATCCTCTCCCTAATACCA,mature-mt_tRNA-Leu-TAA_CCA_end	1.53689	0.0421281	up	26	7	10	28	15	71
CGAAAACGTTGGTTTAAATCCTTCCCGTACTACCA,mature-mt_tRNA-Met-CAT_CCA_end	2.23773	0.000163696	up	41	11	19	63	90	164
CGAAACCATCCTCTGCTACC,mature-tRNA-iMet-CAT	-1.03543	0.0366628	down	399	515	427	136	396	156
CGAAAGGTTGGTGGTTCGAGCCCACCCAGGGACGCCA,mature-tRNA-Asn-GTT_CCA_end	1.84149	0.0219711	up	12	4	7	10	29	42
CGAAGATCGCGGGTTCGAACCCCGTCCGTGCCTCCA,mature-tRNA-Thr-CGT_CCA_end	1.68756	0.0447486	up	23	2	4	16	28	38
CGAAGGTGTAGAGAAATCTCT,mature-mt_tRNA-Cys-GCA	-1.76682	0.0126637	down	37	40	24	14	6	8
CGACTCATTAGATTATGATGATGTTCATAATT,mature-mt_tRNA-Arg-TCG	1.29855	0.0264728	up	69	23	13	73	63	89
CGACTCATTAGATTATGATGATGTTCATAATTACC,mature-mt_tRNA-Arg-TCG	1.64971	0.00671867	up	49	19	11	77	44	96
CGACTCATTAGATTATGATGATGTTCATAATTACCAACCA,mature-mt_tRNA-Arg-TCG_CCA_end	1.95446	0.00027723	up	266	76	111	504	283	812
CGAGCCCCAGTGGAACCACC,mature-tRNA-Val-TAC	-1.69105	0.0192368	down	24	34	25	8	11	7
CGCAGAAGGTCCTGGGTTCGAGCCCCAGTGGAACCACC,mature-tRNA-Val-TAC	1.87742	0.0104692	up	34	4	5	34	53	50
CGCATGGGTTCGAATCCCATCCTCGTCGCCA,mature-tRNA-Ser-GCT_CCA_end	1.38074	0.0208676	up	100	48	46	40	280	180
CGCCGCGGCCCGGGTTCGATTCCCGGTCAGGGAACCA,mature-tRNA-Glu-TTC_CCA_end;mature-tRNA-Glu-CTC_CCA_end	1.41902	0.049684	up	21	12	4	16	37	38
CGCGGCCCGGGTTCGATTCCCGGTCAGGGAACCA,mature-tRNA-Glu-TTC_CCA_end;mature-tRNA-Glu-CTC_CCA_end	2.17524	0.000363068	up	80	32	61	64	423	324
CGCGGGAGACCGGGGTTCAATTCCCCGACGGG,mature-tRNA-Asp-GTC	1.41307	0.0133768	up	89	21	50	70	190	159
CGCGGGAGACCGGGGTTCAATTCCCCGACGGGGA,mature-tRNA-Asp-GTC	1.75013	0.0151511	up	18	3	19	31	64	45
CGCGGGAGACCGGGGTTCGATTCCCCGACGGG,mature-tRNA-Asp-GTC	1.38877	0.00588806	up	331	124	306	421	861	779
CGCGGGAGACCGGGGTTCGATTCCCCGACGGGG,mature-tRNA-Asp-GTC	1.43829	0.0197207	up	60	9	32	64	116	84
CGCGGGAGACCGGGGTTCGATTCCCCGACGGGGA,mature-tRNA-Asp-GTC	1.30658	0.0253182	up	267	35	163	317	458	344
CGCGGGAGACCGGGGTTCGATTCCCCGACGGGGAG,mature-tRNA-Asp-GTC_3_end	1.87491	0.00246968	up	73	9	18	93	118	113
CGCGGGAGACCGGGGTTCGATTCCCCGACGGGGAGCC,mature-tRNA-Asp-GTC	1.34388	0.0210522	up	57	13	30	80	98	63
CGCGGGAGACCGGGGTTCGATTCCCCGACGGGGAGCCA,mature-tRNA-Asp-GTC_CCA_end	2.49741	1.9621e-05	up	58	14	33	82	230	271
CGCGGGAGGCCCGGGTTCGATTCCCGGCCAATGCACCA,mature-tRNA-Gly-GCC_CCA_end	1.98242	0.0189446	up	14	3	6	7	38	43
CGGAAGCGTGCTGGGCC,mature-tRNA-iMet-CAT	-1.26316	0.0478804	down	48	50	43	21	30	8
CGGATAGCTCAGTCGGTAGAGC,mature-tRNA-Lys-TTT	-1.17356	0.0239915	down	2091	1434	424	715	350	440
CGGCCCGGGTTCGACTCCCGGTGTGGGAACCA,mature-tRNA-Glu-TTC_CCA_end	1.01742	0.0398397	up	86	44	62	82	144	161
CGGCCCGGGTTCGATTCCCGGTCAGGGAACCA,mature-tRNA-Glu-TTC_CCA_end;mature-tRNA-Glu-CTC_CCA_end	1.13893	0.0299511	up	84	52	64	63	194	191
CGGCTGTTAACCGAAAGGTTGGTG,mature-tRNA-Asn-GTT	-1.43678	0.0087927	down	66	78	62	22	35	20
CGGGAGACCGGGGTTCGATTCCCCGACGGGGAG,mature-tRNA-Asp-GTC_3_end	1.46915	0.00880115	up	55	21	24	66	141	58
CGGGAGACCGGGGTTCGATTCCCCGACGGGGAGCCA,mature-tRNA-Asp-GTC_CCA_end	1.79383	0.00714398	up	37	7	12	29	66	85
CGGGGTTCGATTCCCCGACGG,mature-tRNA-Asp-GTC	-1.94824	0.0167208	down	38	17	18	3	5	10
CGGGTTCGACTCCCGGTATGGGAACC,mature-tRNA-Glu-TTC	-1.46504	0.0470609	down	25	38	21	4	15	12
CGGGTTCGAGTCCCGGCGGAGTCGCCA,mature-tRNA-Arg-TCT_CCA_end	1.7564	0.0406254	up	8	8	15	4	70	44
CGGTAGAGCATGAGACTCTTAATCTCAGGGTCGTGG,mature-tRNA-Lys-CTT	1.89938	0.0213935	up	6	4	6	15	22	23
CGTAGTGTAGTGGTTATC,mature-tRNA-Val-CAC;mature-tRNA-Val-AAC	-1.59603	0.00225011	down	261	180	72	64	56	32
CGTTAGTATAGTGGTGAGTATCCCCGCCTGTCA,mature-tRNA-Asp-GTC	2.81694	0.0001959	up	30	9	20	13	215	199
CTAAGAAAACACACAAGTTTAACTTCTGCCA,mature-mt_tRNA-Trp-TCA_CCA_end	1.13562	0.00705861	up	383	235	205	488	478	753
CTAATTAAGCTATCGGGCCCATACCCCGAAAACGTTGGTT,mature-mt_tRNA-Met-CAT	3.89797	6.23076e-05	up	4	0	3	13	27	63
CTACACCCAGAAGATTTCATGACCAATGAACACT,mature-mt_tRNA-Val-TAC	1.94663	0.0364731	up	9	1	5	13	13	29
CTACACCCAGAAGATTTCATGACCAATGAACACTCTGACC,mature-mt_tRNA-Val-TAC	2.30022	0.00490874	up	11	1	6	28	31	25
CTACACCCAGAAGATTTCATGACCAATGAACACTCTGACCA,mature-mt_tRNA-Val-TAC_CCA_end	2.56385	1.07588e-05	up	48	12	17	95	106	217
CTAGTGGTTAGGATTCGGCGCTCTCA,mature-tRNA-Glu-CTC	1.20495	0.0394523	up	28	26	20	27	82	63
CTAGTGGTTAGGATTCGGCGCTCTCACC,mature-tRNA-Glu-CTC	2.15737	0.000329417	up	40	23	29	39	216	166
CTAGTGGTTAGGATTCGGCGCTCTCACCG,mature-tRNA-Glu-CTC	2.44444	0.00190686	up	9	4	7	12	66	34
CTAGTGGTTAGGATTCGGCGCTCTCACCGCCGCG,mature-tRNA-Glu-CTC	2.26498	0.0391195	up	6	2	9	0	67	26
CTCAGTCGGTAGAGCATG,mature-tRNA-Lys-CTT	-1.32205	0.00785802	down	242	281	176	118	103	49
CTCAGTCGGTAGAGCATGAGACTCTT,mature-tRNA-Lys-CTT	-2.43858	0.00554604	down	25	20	17	4	2	5
CTCATTAGATTATGATGATGTTCATAATTACCAACCA,mature-mt_tRNA-Arg-TCG_CCA_end	2.59596	3.63359e-07	up	78	24	40	232	214	363
CTCCTTATTCACCCC,mature-mt_tRNA-His-GTG	-1.63087	0.0131806	down	33	69	36	17	10	17
CTCGGTGGAACCTCC,mature-tRNA-Gln-CTG	-1.50546	0.00166936	down	252	480	207	83	140	108
CTCGGTGGAACCTCCA,mature-tRNA-Gln-CTG_CCA_end	-1.20546	0.00949885	down	2701	4540	1435	933	1149	1538
CTCGTTAGTATAGTGGT,mature-tRNA-Asp-GTC	-2.63601	0.00540919	down	35	30	5	4	4	2
CTCTGGTCTTGTAAACCTGAAATGAAGATCTTCTCTT,mature-mt_tRNA-Thr-TGT	1.95179	0.00727326	up	21	4	6	26	34	49
CTGAAATGAAGATCTTCTCTTCTCAAGACACCA,mature-mt_tRNA-Thr-TGT_CCA_end	1.23701	0.00310454	up	763	326	393	920	1152	1254
CTGAATCCAGCGATCCGAGTTCAAATCTCGGTGGAACCTCCA,mature-tRNA-Gln-CTG_CCA_end	2.35051	0.0159561	up	10	6	2	2	26	58
CTGACAACAGGAAATAAACCTCCTTATTCACCCC,mature-mt_tRNA-His-GTG	1.43828	0.0191951	up	63	10	20	67	73	87
CTGACAACAGGAAATAAACCTCCTTATTCACCCCA,mature-mt_tRNA-His-GTG_CCA_end	1.96615	0.00223011	up	21	8	14	35	45	84
CTGACTTCCAATTAGTAGATTCTGAATAAACC,mature-mt_tRNA-Gly-TCC	1.2372	0.0177704	up	117	34	75	116	208	201
CTGACTTCCAATTAGTAGATTCTGAATAAACCCAG,mature-mt_tRNA-Gly-TCC	1.91135	0.000924211	up	61	14	18	65	128	128
CTGACTTCCAATTAGTAGATTCTGAATAAACCCAGA,mature-mt_tRNA-Gly-TCC	1.99566	0.00178321	up	34	9	12	36	62	106
CTGATAAAAGAATTACTTTGATAGAGTAAATTA,mature-mt_tRNA-Ile-GAT	1.47626	0.00718297	up	40	20	15	54	63	77
CTGGTGGTGGGGAGTAGCTCCTTCTTCTTGACCA,mature-mt_tRNA-Pro-TGG_CCA_end	1.74322	0.0124979	up	19	5	8	26	41	34
CTGTGAATCTGACAACA,mature-mt_tRNA-His-GTG	-1.27294	0.040951	down	40	50	29	12	23	14
CTTAGATGGATAATTGTATCCCATAAACACC,mature-mt_tRNA-Phe-GAA	1.03298	0.0283807	up	139	74	46	179	144	156
CTTAGATGGATAATTGTATCCCATAAACACCA,mature-mt_tRNA-Phe-GAA_CCA_end	1.76614	0.00013708	up	460	173	218	898	650	1135
CTTCCAATTAGTAGATTCTGAATAAACCCA,mature-mt_tRNA-Gly-TCC	1.54126	0.0103017	up	24	17	11	36	72	38
CTTCCAATTAGTAGATTCTGAATAAACCCAGA,mature-mt_tRNA-Gly-TCC	1.55892	0.00263751	up	70	24	43	92	146	156
CTTCCAATTAGTAGATTCTGAATAAACCCAGAAGAGAGTACC,mature-mt_tRNA-Gly-TCC	2.54553	0.000177554	up	16	5	5	40	40	59
CTTCCAATTAGTAGATTCTGAATAAACCCAGAAGAGAGTACCA,mature-mt_tRNA-Gly-TCC_CCA_end	2.37441	0.000700837	up	25	4	10	33	51	105
CTTCCATGTTTAAAAACATGGCTTTCTTACCA,mature-mt_tRNA-Ser-GCT_CCA_end	1.91711	0.00280584	up	51	11	21	102	43	138
CTTGTAAACCTGAAATGAAGATCTTCTCTTCTCAAGACACC,mature-mt_tRNA-Thr-TGT	1.4837	0.0377343	up	57	6	12	35	52	97
CTTGTAAACCTGAAATGAAGATCTTCTCTTCTCAAGACACCA,mature-mt_tRNA-Thr-TGT_CCA_end	2.00043	0.00157717	up	161	32	77	110	282	644
CTTGTTCCCAGAGGTTCAAATCCTCTCCCTAATACC,mature-mt_tRNA-Leu-TAA	1.94332	0.00456638	up	56	9	8	112	61	59
CTTGTTCCCAGAGGTTCAAATCCTCTCCCTAATACCA,mature-mt_tRNA-Leu-TAA_CCA_end	2.25831	0.000677393	up	47	4	17	83	80	132
CTTTGATAGAGTAAATTATAGAGGTTCAAG,mature-mt_tRNA-Ile-GAT	1.95574	0.00924497	up	10	8	7	14	28	54
CTTTGTCAAAGTTAAATTATAGATC,mature-mt_tRNA-Asp-GTC	-1.36172	0.00891808	down	97	96	62	35	39	22
GAAAACGTTGGTTTAAATCCTTCCCGTACTACCA,mature-mt_tRNA-Met-CAT_CCA_end	1.79398	0.0077641	up	21	8	13	25	39	78
GAAACCATCCTCTGCTACC,mature-tRNA-iMet-CAT	-1.25934	0.0459514	down	46	54	59	12	42	17
GAAAGATTGCAAGAACT,mature-mt_tRNA-Ser-GCT	-1.24792	0.0332891	down	501	968	428	459	137	150
GAAAGATTGCAAGAACTGC,mature-mt_tRNA-Ser-GCT	-1.03784	0.0389378	down	3164	4348	1987	2159	826	1312
GAAAGATTGCAAGAACTGCTAATTCATGCTTCCATGTT,mature-mt_tRNA-Ser-GCT	1.59368	0.0401052	up	16	3	8	26	20	30
GAAAGATTGCAAGAACTGCTAATTCATGCTTCCATGTTT,mature-mt_tRNA-Ser-GCT	1.59915	0.0461101	up	50	3	11	85	22	53
GAAAGATTGCAAGAACTGCTAATTCATGCTTCCATGTTTA,mature-mt_tRNA-Ser-GCT	2.56456	0.0151719	up	11	1	1	26	4	33
GAAAGGTCCCCGGTTCGAAACCGGGCGGA,mature-tRNA-Val-CAC;mature-tRNA-Val-AAC;mature-tRNA-Gly-ACC	-3.36204	9.20287e-05	down	72	31	19	0	5	6
GAAAGGTCCCCGGTTCGAAACCGGGCGGAAACA,mature-tRNA-Val-CAC_3_end;mature-tRNA-Val-AAC_3_end;mature-tRNA-Gly-ACC_3_end	-2.17185	0.0183911	down	81	6	12	8	4	6
GAAATAAACCTCCTTATTCACCCCA,mature-mt_tRNA-His-GTG_CCA_end	1.19102	0.0185395	up	91	64	72	80	216	231
GAAATGAAGATCTTCTCTT,mature-mt_tRNA-Thr-TGT	-1.56379	0.0311428	down	22	49	28	8	8	18
GAAATGAAGATCTTCTCTTCTCAAGACACCA,mature-mt_tRNA-Thr-TGT_CCA_end	1.04414	0.0110133	up	253	178	150	273	486	414
GAAGATTGAGGGTTCGAGTCCCTTCGTGGTCGCCA,mature-tRNA-Arg-TCG_CCA_end;mature-tRNA-Arg-CCG_CCA_end	2.14677	0.0115187	up	10	3	6	7	38	39
GAAGATTGCAGGTTCGAGTCCTGCCGCGGTCGCCA,mature-tRNA-Arg-TCG_CCA_end	1.88755	0.00463481	up	19	8	7	26	40	52
GAAGATTGGGGGTTCGAGTCCCTTCGTGGTCGCCA,mature-tRNA-Arg-CCG_CCA_end	2.14056	0.0180445	up	12	1	7	7	31	49
GAAGGCTGCGTGTTCGAATCACGTCGGGGTCACCA,mature-tRNA-Trp-CCA_CCA_end	4.47201	0.000234717	up	1	0	2	6	41	24
GAAGGTCCTGGGTTCGAGCCCCAGTGGAACCACCA,mature-tRNA-Val-TAC_CCA_end	1.79995	0.0226971	up	11	6	5	11	40	24
GAAGGTTGCGTGTTCAAATCACGTCGGGGTCACCA,mature-tRNA-Trp-CCA_CCA_end	1.93662	0.00379997	up	59	9	14	35	128	123
GAAGGTTGCGTGTTCAAGTCACGTCGGGGTCACCA,mature-tRNA-Trp-CCA_CCA_end	1.4348	0.0378813	up	45	10	28	19	106	101
GAATATAGTTTACAAAAAACAT,mature-mt_tRNA-His-GTG	1.91614	0.0159935	up	14	19	16	6	137	58
GAATATAGTTTACAAAAAACATTAG,mature-mt_tRNA-His-GTG	1.84759	0.00545387	up	226	229	184	80	1436	914
GAATATAGTTTACAAAAAACATTAGA,mature-mt_tRNA-His-GTG	1.90166	0.00203024	up	413	222	234	167	1948	1192
GAATATAGTTTACAAAAAACATTAGAC,mature-mt_tRNA-His-GTG	1.65607	0.0199652	up	19	29	31	16	179	82
GAATATAGTTTACAAAAAACATTAGACTGTGA,mature-mt_tRNA-His-GTG	1.30554	0.0318349	up	681	190	318	198	1580	1126
GAATATAGTTTACAAAAAACATTAGACTGTGAA,mature-mt_tRNA-His-GTG	1.85726	0.00314706	up	59	36	33	29	238	200
GAATATAGTTTACAAAAAACATTAGACTGTGAAT,mature-mt_tRNA-His-GTG	1.57149	0.021391	up	92	10	39	41	189	173
GAATATAGTTTACAAAAAACATTAGACTGTGAATC,mature-mt_tRNA-His-GTG	1.63211	0.0214084	up	145	15	35	40	279	234
GAATATAGTTTACAAAAAACATTAGACTGTGAATCT,mature-mt_tRNA-His-GTG	1.98742	0.00363203	up	85	7	24	57	165	197
GAATATAGTTTACAAAAAACATTAGACTGTGAATCTG,mature-mt_tRNA-His-GTG	1.56909	0.0223325	up	36	5	13	29	57	63
GAATATAGTTTACAAAAAACATTAGACTGTGAATCTGA,mature-mt_tRNA-His-GTG	1.62358	0.0310894	up	107	10	18	28	122	214
GAATATAGTTTACAAAAAACATTAGACTGTGAATCTGACAA,mature-mt_tRNA-His-GTG	1.81619	0.0133051	up	67	8	22	30	76	208
GAATATAGTTTACAAAAAACATTAGACTGTGAATCTGACAACAG,mature-mt_tRNA-His-GTG	2.36889	0.0140427	up	12	1	5	4	28	57
GAATATAGTTTACAAAAAACATTAGACTGTGAATCTGACAACAGG,mature-mt_tRNA-His-GTG	2.24149	0.00220596	up	25	3	14	24	66	104
GAATCTGACAACAGGAAATAAACCTCCTTATTCACCCC,mature-mt_tRNA-His-GTG	1.69653	0.0190015	up	83	8	12	132	48	90
GAATCTGACAACAGGAAATAAACCTCCTTATTCACCCCA,mature-mt_tRNA-His-GTG_CCA_end	1.93068	0.0111637	up	19	3	11	33	21	65
GAATTCTCGCCTGCC,mature-tRNA-Gly-GCC	-2.85814	0.00317607	down	28	28	11	0	5	4
GACAACAGGAAATAAACCTCCTTATTCACCCC,mature-mt_tRNA-His-GTG	1.47193	0.0153597	up	40	10	28	81	62	65
GACAACAGGAAATAAACCTCCTTATTCACCCCA,mature-mt_tRNA-His-GTG_CCA_end	2.26508	0.000381429	up	22	7	16	53	49	109
GACATATAGGATATGAGATTGGCTTGA,mature-mt_tRNA-Ser-TGA	2.81745	0.00432552	up	3	1	5	10	46	13
GACCAATGAACACTCT,mature-mt_tRNA-Val-TAC	-1.30313	0.010885	down	165	374	259	124	106	101
GACTCATTAGATTATGATGATGTTCATAATTACCAACCA,mature-mt_tRNA-Arg-TCG_CCA_end	1.7285	0.00910451	up	37	10	9	68	32	61
GAGAAAGACATATAG,mature-mt_tRNA-Ser-TGA_5_end	-1.458	0.00244664	down	424	864	475	196	176	272
GAGAAAGACATATAGGATATGAGATTGG,mature-mt_tRNA-Ser-TGA_5_end	1.12145	0.0241213	up	1655	828	1503	1396	4591	3097
GAGAAAGACATATAGGATATGAGATTGGC,mature-mt_tRNA-Ser-TGA_5_end	2.11962	0.00185835	up	63	37	108	60	579	393
GAGAAAGACATATAGGATATGAGATTGGCT,mature-mt_tRNA-Ser-TGA_5_end	1.82247	0.00216414	up	497	264	546	408	2950	1681
GAGAAAGACATATAGGATATGAGATTGGCTTG,mature-mt_tRNA-Ser-TGA_5_end	1.87381	0.00331492	up	639	214	761	491	3586	2452
GAGAAAGACATATAGGATATGAGATTGGCTTGA,mature-mt_tRNA-Ser-TGA_5_end	1.93633	0.00284228	up	166	37	146	112	680	619
GAGAAAGACATATAGGATATGAGATTGGCTTGAAACC,mature-mt_tRNA-Ser-TGA_5_end	1.60656	0.0135753	up	197	23	59	156	145	455
GAGAAAGACATATAGGATATGAGATTGGCTTGAAACCA,mature-mt_tRNA-Ser-TGA_5_end	2.44511	0.00788504	up	6	2	4	7	36	23
GAGAAAGACATATAGGATATGAGATTGGCTTGAAACCAATT,mature-mt_tRNA-Ser-TGA_5_end	2.22175	0.00852668	up	11	1	7	22	19	44
GAGAAAGACATATAGGATATGAGATTGGCTTGAAACCAATTT,mature-mt_tRNA-Ser-TGA_5_end	1.84014	0.0233454	up	13	2	10	20	20	48
GAGCATAGCTGCCTTCCAAGCAGTTGAC,mature-tRNA-Gly-TCC	1.58963	0.0255365	up	31	9	17	18	115	40
GAGCATAGCTGCCTTCCAAGCAGTTGACC,mature-tRNA-Gly-TCC	1.63705	0.0312563	up	26	26	4	15	114	38
GAGCATAGCTGCCTTCCAAGCAGTTGACCCG,mature-tRNA-Gly-TCC	2.6633	0.00447106	up	12	5	4	2	95	35
GAGCCAGGAAATTGC,mature-mt_tRNA-Leu-TAA	1.05733	0.0353589	up	66	125	92	146	290	182
GAGGTCTTAGCTTAATT,mature-mt_tRNA-Ala-TGC_5_end	-1.78238	0.000127713	down	335	405	236	68	76	134
GAGGTCTTAGCTTAATTA,mature-mt_tRNA-Ala-TGC_5_end	-1.31571	0.018612	down	139	192	92	20	64	86
GAGGTCTTAGCTTAATTAAAGC,mature-mt_tRNA-Ala-TGC_5_end	-1.46237	0.00235077	down	2838	2752	787	489	622	1017
GAGGTCTTAGCTTAATTAAAGCAATTGATTTGCATT,mature-mt_tRNA-Ala-TGC_5_end	1.45621	0.0468958	up	47	12	10	15	51	105
GAGGTCTTAGCTTAATTAAAGCAATTGATTTGCATTCA,mature-mt_tRNA-Ala-TGC_5_end	1.45921	0.0240332	up	239	46	49	115	161	527
GAGGTCTTAGCTTAATTAAAGCAATTGATTTGCATTCAAT,mature-mt_tRNA-Ala-TGC_5_end	1.58958	0.0156565	up	77	19	26	51	62	223
GAGGTCTTAGCTTAATTAAAGCAATTGATTTGCATTCAATA,mature-mt_tRNA-Ala-TGC_5_end	1.94427	0.00609576	up	36	9	23	33	47	176
GAGGTCTTAGCTTAATTAAAGCAATTGATTTGCATTCAATAGATG,mature-mt_tRNA-Ala-TGC_5_end	1.94418	0.021272	up	21	2	8	17	19	74
GAGTAAGCATTAGACTGT,mature-mt_tRNA-Tyr-GTA	-2.60162	0.00230642	down	27	32	18	7	3	2
GATAAAAGAATTACTTTGATAGAGTAAATTA,mature-mt_tRNA-Ile-GAT	1.74757	0.0351657	up	9	2	10	17	21	34
GATAGAGTAAATTATAGAGGTTCAAGCCCTCTT,mature-mt_tRNA-Ile-GAT	1.5282	0.0366785	up	32	6	7	42	22	48
GATAGAGTAAATTATAGAGGTTCAAGCCCTCTTA,mature-mt_tRNA-Ile-GAT	2.25103	0.00424901	up	10	7	5	51	13	31
GATATTCATGTCGAATTGCAAATTCGAAGG,mature-mt_tRNA-Cys-GCA	1.25958	0.0262066	up	228	46	80	115	370	311
GATATTCATGTCGAATTGCAAATTCGAAGGTGTAGAGA,mature-mt_tRNA-Cys-GCA	1.8389	0.0193877	up	34	2	9	22	46	77
GATTGAGGGTTCGAGTCCCTTCGTGGTCGC,mature-tRNA-Arg-TCG;mature-tRNA-Arg-CCG	-1.76772	0.0446983	down	46	10	10	6	7	4
GATTGAGGGTTCGAGTCCCTTCGTGGTCGCCA,mature-tRNA-Arg-TCG_CCA_end;mature-tRNA-Arg-CCG_CCA_end	1.65886	0.0470117	up	11	12	5	5	32	50
GATTTGCATTCAATAGATGTAGGATGAAGTC,mature-mt_tRNA-Ala-TGC	1.53354	0.00137313	up	311	104	124	275	614	586
GCAAATCCAAATAAAAGTACCA,mature-mt_tRNA-Leu-TAG_CCA_end	1.01959	0.0136259	up	11929	14570	11556	18172	30559	30047
GCAAATTCGAAGGTGTAGAGAAATCTCTACTAAGACTTCCA,mature-mt_tRNA-Cys-GCA_CCA_end	1.89474	0.0236088	up	13	3	4	21	14	32
GCAATTGATTTGCATTCAATAGATGTAGGATGAAGT,mature-mt_tRNA-Ala-TGC	1.63207	0.0202547	up	30	8	10	28	28	80
GCAGGTTCGAGTCCTGCCGCGGTCGC,mature-tRNA-Arg-TCG	-2.01459	0.028995	down	85	11	10	13	6	2
GCATGGGTGGTTCAGTGGTAGAATTCTCGCCT,mature-tRNA-Gly-GCC_5_end	1.10093	0.0488067	up	841	289	344	1629	525	616
GCATGGGTGGTTCAGTGGTAGAATTCTCGCCTG,mature-tRNA-Gly-GCC_5_end	1.77248	0.00384147	up	51	10	21	48	95	121
GCATGGGTGGTTCAGTGGTAGAATTCTCGCCTGC,mature-tRNA-Gly-GCC_5_end	1.18605	0.014035	up	299	116	164	301	336	623
GCATGGGTGGTTCAGTGGTAGAATTCTCGCCTGCCAC,mature-tRNA-Gly-GCC_5_end	2.62215	0.0048052	up	14	0	6	12	27	77
GCATGGGTGGTTCAGTGGTAGAATTCTCGCCTGCCACG,mature-tRNA-Gly-GCC_5_end	2.09688	0.00754158	up	16	3	7	17	27	61
GCATTGGTGGTTCAGTGG,mature-tRNA-Gly-GCC_5_end	-1.16441	0.0171751	down	145	231	101	74	69	63
GCATTGGTGGTTCAGTGGTAGAATTCTCGCCTGCCA,mature-tRNA-Gly-GCC_5_end	1.69958	0.00512682	up	254	43	69	279	177	584
GCATTGGTGGTTCAGTGGTAGAATTCTCGCCTGCCACGCGG,mature-tRNA-Gly-GCC_5_end	1.7952	0.0305047	up	46	1	14	27	47	117
GCCCGGATAGCTCAGTCGGT,mature-tRNA-Lys-TTT_5_end	-1.15225	0.010323	down	540	652	322	228	158	261
GCCCGGATAGCTCAGTCGGTA,mature-tRNA-Lys-TTT_5_end	-1.0944	0.0119284	down	536	572	356	159	201	311
GCCCGGATAGCTCAGTCGGTAGAGC,mature-tRNA-Lys-TTT_5_end	-1.43555	0.017573	down	1152	798	204	383	94	189
GCCCGGATAGCTCAGTCGGTAGAGCATC,mature-tRNA-Lys-TTT_5_end	-1.22602	0.0486085	down	227	168	43	87	25	47
GCCCGGATGATCCTC,mature-tRNA-SeC-TCA_5_end	-1.67413	0.00917026	down	156	337	69	82	21	57
GCCCTAAGAAAACACACAAGTTTAACTTCTGCCA,mature-mt_tRNA-Trp-TCA_CCA_end	1.79307	0.00256903	up	27	11	13	38	62	69
GCCGTGATCGTATAGTGGTTAGTACTCTGCGTTG,mature-tRNA-His-GTG	1.18349	0.0378991	up	143	35	72	190	96	238
GCCTCCTTAGCGCAGTAGG,mature-tRNA-Met-CAT_5_end	-1.17793	0.0223468	down	1216	2018	885	232	724	882
GCCTCGTTAGCGCAGTAGG,mature-tRNA-Met-CAT_5_end	-1.29031	0.00867003	down	294	447	129	80	128	133
GCCTTCTTAGCGCAGTAGG,mature-tRNA-Met-CAT_5_end	-1.27742	0.0118552	down	209	279	164	44	88	138
GCGCCGCTGGTGTAG,mature-tRNA-Gly-CCC_5_end	-1.2502	0.015496	down	85	126	79	35	55	33
GCGGCCCGGGTTCGACTCCCGGTATGGGAACCA,mature-tRNA-Glu-TTC_CCA_end	1.68152	0.0313018	up	8	14	6	9	39	43
GCGGCCCGGGTTCGACTCCCGGTGTGGGAACCA,mature-tRNA-Glu-TTC_CCA_end	1.59308	0.00761658	up	25	17	18	28	79	75
GCGGCCCGGGTTCGATTCCCGGT,mature-tRNA-Glu-TTC;mature-tRNA-Glu-CTC	1.55928	0.0326131	up	28	11	5	17	72	31
GCGGCCCGGGTTCGATTCCCGGTCAGGGAACCA,mature-tRNA-Glu-TTC_CCA_end;mature-tRNA-Glu-CTC_CCA_end	2.06725	0.000684875	up	76	33	67	67	441	272
GCGGGAGACCGGGGTTCAATTCCCCGACGGG,mature-tRNA-Asp-GTC	1.42505	0.00915887	up	52	27	47	58	156	135
GCGGGAGACCGGGGTTCGATTCCCCGACGGG,mature-tRNA-Asp-GTC	1.5067	0.00379177	up	121	58	129	168	381	370
GCGGGAGACCGGGGTTCGATTCCCCGACGGGGA,mature-tRNA-Asp-GTC	1.07897	0.0289279	up	212	63	101	259	300	186
GCGGGAGACCGGGGTTCGATTCCCCGACGGGGAGCCA,mature-tRNA-Asp-GTC_CCA_end	1.60416	0.00712847	up	78	13	34	69	141	150
GCGTTGGTGGTATAGTGGTGAGC,mature-tRNA-Gly-TCC_5_end	-1.23483	0.020009	down	2961	1522	557	902	548	372
GCTGAGTAAGCATTA,mature-mt_tRNA-Tyr-GTA	-1.38164	0.00424484	down	713	916	342	308	163	227
GCTTAGATGGATAATTGTATCCCATAAACACC,mature-mt_tRNA-Phe-GAA	1.45282	0.0366229	up	42	7	7	45	47	40
GCTTAGATGGATAATTGTATCCCATAAACACCA,mature-mt_tRNA-Phe-GAA_CCA_end	2.05584	0.000137058	up	105	25	48	211	167	307
GCTTCCATGTTTAAAAACATGGCTTTCTTACCA,mature-mt_tRNA-Ser-GCT_CCA_end	1.91586	0.00261703	up	46	14	11	94	39	99
GGAGAATTTTGAATTCTTA,mature-mt_tRNA-Gln-TTG	1.7289	0.0117735	up	8	11	10	27	40	31
GGAGACCGGGGTTCGATTCCCCGACGGGGAG,mature-tRNA-Asp-GTC_3_end	2.51354	0.00085704	up	11	3	4	27	38	31
GGATTCGGCGCTCTC,mature-tRNA-Glu-CTC	-1.32395	0.00396749	down	779	1416	1048	341	580	432
GGCCGGTTAGCTCAG,mature-tRNA-Ile-AAT_5_end	-1.00173	0.0209258	down	1057	1693	1100	496	721	740
GGCCGTGATCGTATAGTGGTTAGTACTCT,mature-tRNA-His-GTG_5_end	1.20508	0.0190672	up	105	91	176	220	368	341
GGCCGTGATCGTATAGTGGTTAGTACTCTGC,mature-tRNA-His-GTG_5_end	1.29029	0.0149946	up	68	26	42	124	85	106
GGCCGTGATCGTATAGTGGTTAGTACTCTGCGT,mature-tRNA-His-GTG_5_end	1.47637	0.00701076	up	43	19	35	64	128	81
GGCCGTGATCGTATAGTGGTTAGTACTCTGCGTT,mature-tRNA-His-GTG_5_end	1.06152	0.0272713	up	270	130	143	492	303	253
GGCCGTGATCGTATAGTGGTTAGTACTCTGCGTTG,mature-tRNA-His-GTG_5_end	1.66403	0.00187935	up	137	36	53	241	143	261
GGCCGTGATCGTATAGTGGTTAGTACTCTGCGTTGT,mature-tRNA-His-GTG_5_end	1.59786	0.00140806	up	186	71	101	463	259	280
GGCCGTGATCGTATAGTGGTTAGTACTCTGCGTTGTG,mature-tRNA-His-GTG_5_end	2.39278	0.0013401	up	6	5	9	19	41	50
GGCTCCATAGCTCAGG,mature-tRNA-Thr-TGT_5_end	-1.14485	0.0434561	down	81	144	56	53	44	25
GGCTCGTTGGTCTAGGGGTATGATTCTCG,mature-tRNA-Pro-TGG_5_end;mature-tRNA-Pro-CGG_5_end;mature-tRNA-Pro-AGG_5_end	1.78453	0.0387309	up	11	7	2	10	39	16
GGCTCGTTGGTCTAGGGGTATGATTCTCGCTT,mature-tRNA-Pro-TGG_5_end;mature-tRNA-Pro-CGG_5_end;mature-tRNA-Pro-AGG_5_end	2.17396	0.00716705	up	9	2	6	19	30	26
GGGAGACCGGGGTTCGATTCCCCGACGGGG,mature-tRNA-Asp-GTC	1.02241	0.0429146	up	67	33	46	104	100	83
GGGAGACCGGGGTTCGATTCCCCGACGGGGAGCCA,mature-tRNA-Asp-GTC_CCA_end	1.54035	0.0346868	up	15	6	13	14	41	46
GGGAGTAGCTCCTTCTTCTTGACCA,mature-mt_tRNA-Pro-TGG_CCA_end	1.51679	0.00855114	up	269	348	223	207	1620	704
GGGGAGTAGCTCCTTCTT,mature-mt_tRNA-Pro-TGG	1.5006	0.0204202	up	23	26	10	33	100	31
GGGGAGTAGCTCCTTCTTCTTGACC,mature-mt_tRNA-Pro-TGG	1.17072	0.0233348	up	409	300	302	351	1499	504
GGGGAGTAGCTCCTTCTTCTTGACCA,mature-mt_tRNA-Pro-TGG_CCA_end	1.59522	0.00173766	up	354	498	337	499	2153	1119
GGGGATGTAGCTCAG,mature-tRNA-Ala-TGC_5_end;mature-tRNA-Ala-CGC_5_end;mature-tRNA-Ala-AGC_5_end	-1.06553	0.012237	down	1022	1487	988	429	611	651
GGGGATGTAGCTCAGT,mature-tRNA-Ala-TGC_5_end;mature-tRNA-Ala-CGC_5_end;mature-tRNA-Ala-AGC_5_end	-1.05308	0.0184561	down	465	629	407	285	211	211
GGGGGTATAGCTCAGTGGTAGAGCATTTGACTG,mature-tRNA-Cys-GCA_5_end	1.09563	0.0266993	up	626	144	256	695	634	675
GGGGGTATAGCTCAGTGGTAGAGCATTTGACTGCA,mature-tRNA-Cys-GCA_5_end	1.96139	0.00219579	up	15	9	12	28	50	62
GGGTTCGATTCCTTCCTTTCTTA,mature-mt_tRNA-Ser-TGA_3_end	1.18272	0.0471794	up	76	56	14	44	159	105
GGTAAAATGGCTGAGTAAGCATTA,mature-mt_tRNA-Tyr-GTA_5_end	-1.22889	0.00532541	down	4593	2996	1265	1285	1004	1075
GGTAGAATTCTCGCCTGCCACGCGGGAG,mature-tRNA-Gly-GCC	2.03972	0.0274453	up	4	6	4	5	34	21
GGTAGAATTCTCGCCTGCCACGCGGGAGGCC,mature-tRNA-Gly-GCC	1.44582	0.0449034	up	46	18	9	12	101	72
GGTAGAGCATGAGACTCTTAATCTCAGGGTCGTGG,mature-tRNA-Lys-CTT	1.92485	0.0221788	up	11	2	5	14	25	26
GGTAGAGCATTTGACTGC,mature-tRNA-Cys-GCA	-1.22952	0.0140681	down	116	82	66	37	43	28
GGTATAGTGGTGAGC,mature-tRNA-Gly-TCC	-1.14246	0.0166382	down	910	728	269	245	392	162
GGTATTTAGCTGTTAACTAAATTTTCGTA,mature-mt_tRNA-Asn-GTT	2.11757	0.00965165	up	8	5	3	18	31	17
GGTCCAGGGTTCAAG,mature-tRNA-Lys-TTT	-1.77127	0.020478	down	17	32	31	6	12	7
GGTCTAGTGGTTAGGATTCGGCGC,mature-tRNA-Glu-CTC	1.32862	0.00941382	up	263	74	119	259	581	258
GGTCTAGTGGTTAGGATTCGGCGCT,mature-tRNA-Glu-CTC	1.84257	0.00110225	up	965	275	358	671	3560	1306
GGTCTAGTGGTTAGGATTCGGCGCTCT,mature-tRNA-Glu-CTC	1.41181	0.00604532	up	134	64	97	122	419	260
GGTCTAGTGGTTAGGATTCGGCGCTCTCA,mature-tRNA-Glu-CTC	2.58989	0.00482529	up	2	2	8	10	39	33
GGTCTAGTGGTTAGGATTCGGCGCTCTCAC,mature-tRNA-Glu-CTC	2.78679	0.00298284	up	9	1	3	6	44	36
GGTCTAGTGGTTAGGATTCGGCGCTCTCACC,mature-tRNA-Glu-CTC	3.32652	5.61171e-05	up	9	4	7	7	97	103
GGTCTAGTGGTTAGGATTCGGCGCTCTCACCGCCGC,mature-tRNA-Glu-CTC	2.33079	0.0286726	up	10	2	2	1	35	30
GGTCTTAAGGTGATA,mature-mt_tRNA-Cys-GCA_5_end	-2.02271	0.00190011	down	48	80	25	11	11	14
GGTCTTAAGGTGATATT,mature-mt_tRNA-Cys-GCA_5_end	-1.19683	0.0132995	down	169	177	76	65	56	51
GGTCTTAAGGTGATATTC,mature-mt_tRNA-Cys-GCA_5_end	-1.65543	0.00399697	down	134	78	43	34	17	21
GGTCTTAAGGTGATATTCATGTCGAATTGCAAATT,mature-mt_tRNA-Cys-GCA_5_end	1.64631	0.035482	up	24	2	8	23	30	44
GGTCTTAAGGTGATATTCATGTCGAATTGCAAATTC,mature-mt_tRNA-Cys-GCA_5_end	1.67876	0.0356209	up	26	4	3	25	25	40
GGTGCAAATCCAAATAAAAGTACCA,mature-mt_tRNA-Leu-TAG_CCA_end	1.13973	0.0358705	up	33	25	27	44	66	77
GGTTAGGATTCGGCGCTCTCACC,mature-tRNA-Glu-CTC	1.95579	0.000688048	up	72	81	61	72	470	325
GGTTCAGTGGTAGAATTCTCGCCTGCCA,mature-tRNA-Gly-GCC	1.00858	0.0168286	up	2508	1531	1987	2901	4091	5148
GGTTCAGTGGTAGAATTCTCGCCTGCCACGCGG,mature-tRNA-Gly-GCC	1.77942	0.0041865	up	935	151	232	370	1949	1815
GGTTCAGTGGTAGAATTCTCGCCTGCCACGCGGG,mature-tRNA-Gly-GCC	2.14997	0.00649978	up	88	3	24	34	234	202
GGTTCAGTGGTAGAATTCTCGCCTGCCACGCGGGA,mature-tRNA-Gly-GCC	2.35172	0.00241612	up	29	6	3	20	49	100
GGTTCAGTGGTAGAATTCTCGCCTGCCACGCGGGAG,mature-tRNA-Gly-GCC	3.21564	0.00191594	up	7	1	1	4	33	40
GGTTCAGTGGTAGAATTCTCGCCTGCCACGCGGGAGG,mature-tRNA-Gly-GCC	2.13975	0.00414155	up	53	8	17	16	153	156
GGTTCCATAGTGTAG,mature-tRNA-Val-TAC_5_end	-1.12941	0.0213455	down	340	618	253	202	129	201
GGTTCCATAGTGTAGCG,mature-tRNA-Val-TAC_5_end	-1.08127	0.0190608	down	192	243	171	81	83	121
GGTTCCATAGTGTAGCGGTTATCAC,mature-tRNA-Val-TAC_5_end	-1.01954	0.0488856	down	164	113	56	65	42	41
GGTTCCATGGTGTAATGG,mature-tRNA-Gln-CTG_5_end	-1.69757	0.041055	down	26	36	8	8	8	4
GGTTCCGGGTTCGAG,mature-tRNA-Arg-TCT	-1.52839	0.00495441	down	68	117	72	31	28	30
GTAAACCTGAAATGAAGATCT,mature-mt_tRNA-Thr-TGT	-1.49224	0.0461538	down	38	34	15	15	6	7
GTAAACCTGAAATGAAGATCTTCTCTTCTCAAGACACCA,mature-mt_tRNA-Thr-TGT_CCA_end	1.63116	0.00170704	up	139	44	55	274	149	240
GTAAATTATAGAGGTTC,mature-mt_tRNA-Ile-GAT	-1.64206	0.0334723	down	24	31	19	5	14	5
GTAAGGTCAGCTAATTAAGCTATCGGGCC,mature-mt_tRNA-Met-CAT	-1.39766	0.0178677	down	106	40	76	36	24	21
GTAATAGGGTATTTAGCTGTTAACT,mature-mt_tRNA-Asn-GTT	1.96766	0.000234331	up	46	20	19	66	107	141
GTAATAGGGTATTTAGCTGTTAACTA,mature-mt_tRNA-Asn-GTT	1.64453	0.00755355	up	14	15	17	34	69	46
GTAATAGGGTATTTAGCTGTTAACTAA,mature-mt_tRNA-Asn-GTT	2.22534	0.00144261	up	13	5	6	26	41	40
GTAATAGGGTATTTAGCTGTTAACTAAA,mature-mt_tRNA-Asn-GTT	1.98203	0.00257222	up	18	17	8	33	102	32
GTAATAGGGTATTTAGCTGTTAACTAAAT,mature-mt_tRNA-Asn-GTT	1.90323	0.000102958	up	111	48	42	144	364	207
GTAATAGGGTATTTAGCTGTTAACTAAATT,mature-mt_tRNA-Asn-GTT	1.47737	0.00184763	up	94	44	49	111	189	202
GTAATAGGGTATTTAGCTGTTAACTAAATTT,mature-mt_tRNA-Asn-GTT	1.99711	0.00417974	up	16	6	7	26	31	52
GTAATAGGGTATTTAGCTGTTAACTAAATTTT,mature-mt_tRNA-Asn-GTT	2.14764	0.00111809	up	18	8	20	37	57	116
GTAATAGGGTATTTAGCTGTTAACTAAATTTTC,mature-mt_tRNA-Asn-GTT	1.79063	0.0233759	up	25	4	3	22	47	28
GTAATAGGGTATTTAGCTGTTAACTAAATTTTCG,mature-mt_tRNA-Asn-GTT	2.82944	0.000137441	up	15	2	7	22	71	72
GTAATAGGGTATTTAGCTGTTAACTAAATTTTCGT,mature-mt_tRNA-Asn-GTT	3.1418	2.9849e-06	up	43	6	14	52	193	274
GTAATAGGGTATTTAGCTGTTAACTAAATTTTCGTA,mature-mt_tRNA-Asn-GTT	3.46639	6.24678e-09	up	86	19	22	150	475	658
GTAATAGGGTATTTAGCTGTTAACTAAATTTTCGTAG,mature-mt_tRNA-Asn-GTT	3.48869	2.56502e-07	up	44	5	18	71	253	391
GTAATAGGGTATTTAGCTGTTAACTAAATTTTCGTAGG,mature-mt_tRNA-Asn-GTT	3.29518	0.000285785	up	15	0	2	17	45	84
GTAATAGGGTATTTAGCTGTTAACTAAATTTTCGTAGGTT,mature-mt_tRNA-Asn-GTT	3.88515	0.000101943	up	5	0	2	9	34	56
GTAATCCATTGGTCTT,mature-mt_tRNA-Leu-TAG	-1.07877	0.0449654	down	111	164	62	60	34	56
GTAATCCATTGGTCTTA,mature-mt_tRNA-Leu-TAG	-1.30132	0.0483629	down	48	76	42	34	9	21
GTAGAATTCTCGCCTGC,mature-tRNA-Gly-GCC	-1.78688	0.00136995	down	383	420	170	147	49	57
GTAGAATTCTCGCCTGCC,mature-tRNA-Gly-GCC	-1.84947	8.0764e-06	down	2572	3717	2242	630	949	800
GTAGAGCATTTGACTGC,mature-tRNA-Cys-GCA	-2.70287	0.000595643	down	26	30	44	6	3	7
GTAGATTCTGAATAAACCCAGAAGAGAGTACCA,mature-mt_tRNA-Gly-TCC_CCA_end	1.44427	0.00142409	up	150	85	100	214	278	401
GTAGTGGTTATCACGTTCGCCTC,mature-tRNA-Val-CAC	-1.63636	0.0480879	down	49	23	17	6	2	18
GTAGTGTAGTGGTTATC,mature-tRNA-Val-CAC;mature-tRNA-Val-AAC	-1.55989	0.00700799	down	221	165	58	69	25	37
GTATAATTAATATAACTGACTTCCAATTAGTAGA,mature-mt_tRNA-Gly-TCC	2.79444	0.00309155	up	10	4	0	8	40	39
GTATAATTAATATAACTGACTTCCAATTAGTAGATT,mature-mt_tRNA-Gly-TCC	3.15444	0.00138536	up	17	1	2	4	44	108
GTATTTAGCTGTTAACTA,mature-mt_tRNA-Asn-GTT	1.54856	0.0436797	up	3	16	13	23	48	31
GTATTTAGCTGTTAACTAAATTTTCGTA,mature-mt_tRNA-Asn-GTT	1.15131	0.0203529	up	66	72	44	72	193	140
GTATTTAGCTGTTAACTAAATTTTCGTAGGTT,mature-mt_tRNA-Asn-GTT	1.20155	0.037798	up	50	14	21	52	61	69
GTCAAAGTTAAATTATAGATC,mature-mt_tRNA-Asp-GTC	-1.33611	0.0336704	down	45	48	23	14	18	12
GTCACGTCGGGGTCAC,mature-tRNA-Trp-CCA	-1.83937	0.0194323	down	32	23	36	11	13	2
GTCAGGATGGCCGAG,mature-tRNA-Leu-CAG_5_end;mature-tRNA-Leu-CAA_5_end	-1.00013	0.0279562	down	237	303	170	102	97	147
GTCAGGATGGCCGAGC,mature-tRNA-Leu-CAG_5_end	-1.53118	0.0142053	down	49	79	33	24	14	15
GTCAGGATGGCCGAGCG,mature-tRNA-Leu-CAG_5_end	-1.16524	0.0327101	down	71	118	76	45	29	43
GTCATTGGTCGCAGTTGAATGCTGTGTAGAAATACCA,mature-mt_tRNA-Glu-TTC_CCA_end	1.85406	6.6858e-05	up	413	123	187	632	841	984
GTCTAGTGGTTAGGATTCGGCGC,mature-tRNA-Glu-CTC	1.11753	0.0321399	up	98	39	33	89	173	82
GTCTAGTGGTTAGGATTCGGCGCT,mature-tRNA-Glu-CTC	1.52479	0.00310885	up	823	337	256	614	2346	898
GTCTAGTGGTTAGGATTCGGCGCTCT,mature-tRNA-Glu-CTC	1.63552	0.00270682	up	74	52	41	76	323	122
GTCTAGTGGTTAGGATTCGGCGCTCTCA,mature-tRNA-Glu-CTC	2.01155	0.0436004	up	9	0	7	6	30	30
GTCTAGTGGTTAGGATTCGGCGCTCTCAC,mature-tRNA-Glu-CTC	2.45238	0.00410255	up	6	5	4	16	55	12
GTCTAGTGGTTAGGATTCGGCGCTCTCACC,mature-tRNA-Glu-CTC	2.94722	0.000130452	up	7	6	5	12	68	61
GTCTCTGTGGCGCAATCG,mature-tRNA-Asn-GTT_5_end	-1.61749	0.012349	down	67	88	40	9	14	39
GTCTCTGTGGCGCAATCGG,mature-tRNA-Asn-GTT_5_end	-1.36732	0.00567203	down	173	198	87	45	46	78
GTCTTGATAGTATAAAC,mature-mt_tRNA-Thr-TGT_5_end	-1.9529	1.79831e-05	down	367	351	198	43	104	85
GTCTTGATAGTATAAACATT,mature-mt_tRNA-Thr-TGT_5_end	-1.14111	0.041196	down	196	258	119	26	108	126
GTCTTGATAGTATAAACATTACTCT,mature-mt_tRNA-Thr-TGT_5_end	-1.60857	0.0306016	down	40	42	34	2	14	23
GTCTTGATAGTATAAACATTACTCTGGTCTTGTAAAC,mature-mt_tRNA-Thr-TGT_5_end	2.02446	0.0133338	up	35	5	7	11	46	114
GTCTTGATAGTATAAACATTACTCTGGTCTTGTAAACC,mature-mt_tRNA-Thr-TGT_5_end	2.26719	0.0011788	up	18	14	23	23	78	179
GTCTTGATAGTATAAACATTACTCTGGTCTTGTAAACCT,mature-mt_tRNA-Thr-TGT_5_end	2.37792	0.00487293	up	21	3	7	8	45	98
GTCTTGATAGTATAAACATTACTCTGGTCTTGTAAACCTGA,mature-mt_tRNA-Thr-TGT_5_end	1.78335	0.043859	up	15	4	7	4	29	54
GTGAATATAGTTTACAAAAAACATTAGACTGTGAATCTGACA,mature-mt_tRNA-His-GTG_5_end	1.76923	0.0231838	up	17	4	9	16	23	59
GTGATATTCATGTCGAATTGC,mature-mt_tRNA-Cys-GCA	-1.56729	0.00284704	down	264	177	77	73	45	37
GTGGGGAGTAGCTCCTTCTT,mature-mt_tRNA-Pro-TGG	1.43303	0.0309451	up	14	11	12	21	46	34
GTGGGGAGTAGCTCCTTCTTCTTGACCA,mature-mt_tRNA-Pro-TGG_CCA_end	1.67192	0.00189266	up	160	197	198	227	1099	584
GTGGTAGAGCATTTGACTGC,mature-tRNA-Cys-GCA	-1.352	0.00195333	down	1426	1226	1163	616	491	351
GTGGTGAGCATAGCTGCCTTCCAAGCAGTTGACCCG,mature-tRNA-Gly-TCC	2.35732	0.000633346	up	60	21	36	31	419	168
GTGGTGAGCATAGCTGCCTTCCAAGCAGTTGACCCGG,mature-tRNA-Gly-TCC	3.11179	4.84543e-06	up	46	8	14	41	291	224
GTGGTTAGGATTCGGCGCTCTCA,mature-tRNA-Glu-CTC	1.05943	0.0314573	up	84	62	64	93	234	117
GTGGTTAGGATTCGGCGCTCTCAC,mature-tRNA-Glu-CTC	1.15992	0.0201549	up	60	65	51	75	199	128
GTGGTTAGGATTCGGCGCTCTCACC,mature-tRNA-Glu-CTC	1.34263	0.00604442	up	139	119	106	133	452	358
GTGGTTAGGATTCGGCGCTCTCACCGCCGCG,mature-tRNA-Glu-CTC	2.39098	0.0149706	up	14	2	3	2	49	42
GTGGTTAGGATTCGGCGCTCTCACCGCCGCGG,mature-tRNA-Glu-CTC	1.62442	0.0143507	up	31	15	11	18	95	57
GTGGTTATCACGTTCGCCT,mature-tRNA-Val-CAC;mature-tRNA-Val-AAC	-1.6727	0.00982009	down	331	384	116	156	41	30
GTGGTTATCACGTTCGCCTC,mature-tRNA-Val-CAC	-1.91837	8.69839e-05	down	380	603	194	113	86	94
GTGGTTCAGTGGTAGAATTCTCGCCTGCCA,mature-tRNA-Gly-GCC	1.59826	0.0250899	up	26	7	11	16	43	68
GTGGTTCAGTGGTAGAATTCTCGCCTGCCAC,mature-tRNA-Gly-GCC	1.58885	0.00468317	up	102	22	37	82	201	171
GTGGTTCAGTGGTAGAATTCTCGCCTGCCACG,mature-tRNA-Gly-GCC	1.87614	0.00604656	up	21	7	9	20	50	60
GTGGTTCAGTGGTAGAATTCTCGCCTGCCACGCGG,mature-tRNA-Gly-GCC	2.00145	0.0133245	up	42	6	5	11	93	84
GTGTAGTGGTTATCACGTTCGCCT,mature-tRNA-Val-CAC;mature-tRNA-Val-AAC	-1.64738	0.0332028	down	166	86	33	56	15	4
GTTAAAGTTAGAGACCTTAAAATCTCCATAGTGACCA,mature-mt_tRNA-Lys-TTT_CCA_end	2.26935	5.1112e-05	up	52	17	16	122	83	162
GTTAATGTAGCTTAATAAC,mature-mt_tRNA-Phe-GAA_5_end	-1.57987	0.0274727	down	45	47	18	11	5	18
GTTAATGTAGCTTAATAACAAAG,mature-mt_tRNA-Phe-GAA_5_end	-1.61452	0.0147315	down	30	64	36	11	12	20
GTTAATGTAGCTTAATAACAAAGC,mature-mt_tRNA-Phe-GAA_5_end	-1.4736	0.0296963	down	40	84	21	22	13	14
GTTAGAGACCTTAAAATCTCCATAGTGACCA,mature-mt_tRNA-Lys-TTT_CCA_end	1.19856	0.00404665	up	657	310	273	829	794	1008
GTTAGGATTCGGCGCTCTC,mature-tRNA-Glu-CTC	-1.28749	0.0117572	down	104	208	98	50	65	53
GTTCAAATCTCGGTGGAACCTC,mature-tRNA-Gln-CTG	-1.19579	0.0277043	down	109	93	81	18	67	41
GTTCAGTGGTAGAATTCTCGCCTGCCACGCGG,mature-tRNA-Gly-GCC	1.31205	0.0244391	up	1321	317	376	426	2319	1914
GTTCAGTGGTAGAATTCTCGCCTGCCACGCGGGA,mature-tRNA-Gly-GCC	2.09566	0.00424236	up	36	4	10	23	73	100
GTTCCCAGAGGTTCAAATCCTCTCCCTAATACC,mature-mt_tRNA-Leu-TAA	1.99624	0.000947527	up	34	9	16	89	76	53
GTTCCCAGAGGTTCAAATCCTCTCCCTAATACCA,mature-mt_tRNA-Leu-TAA_CCA_end	1.84479	0.00276769	up	63	11	25	80	78	169
GTTTAAAAAAAATTAATGATTTCGACTCATTAGA,mature-mt_tRNA-Arg-TCG	1.95222	0.00462124	up	98	14	23	43	151	276
GTTTAAAAAAAATTAATGATTTCGACTCATTAGATT,mature-mt_tRNA-Arg-TCG	1.82034	0.00503617	up	59	11	17	52	66	159
GTTTAAAAAAAATTAATGATTTCGACTCATTAGATTA,mature-mt_tRNA-Arg-TCG	2.72593	0.00543165	up	13	1	1	8	25	53
GTTTAAAAAAAATTAATGATTTCGACTCATTAGATTATG,mature-mt_tRNA-Arg-TCG	2.12805	0.004319	up	50	5	12	32	62	167
GTTTAAATCCTCTTTTTACCACCA,mature-mt_tRNA-Tyr-GTA_CCA_end	1.38618	0.0140642	up	35	19	19	54	47	80
GTTTACAAAAAACATTAG,mature-mt_tRNA-His-GTG	1.42102	0.0453379	up	93	153	92	26	595	349
GTTTACAAAAAACATTAGA,mature-mt_tRNA-His-GTG	1.28844	0.0419359	up	252	264	149	78	1053	540
GTTTACAAAAAACATTAGACTGTGAATCTGACAA,mature-mt_tRNA-His-GTG	1.48459	0.0274159	up	163	43	56	33	333	334
GTTTACAAAAAACATTAGACTGTGAATCTGACAACAG,mature-mt_tRNA-His-GTG	2.10903	0.0212904	up	33	1	8	6	98	64
GTTTACAAAAAACATTAGACTGTGAATCTGACAACAGG,mature-mt_tRNA-His-GTG	2.18751	0.00169041	up	205	28	70	68	653	590
GTTTACAAAAAACATTAGACTGTGAATCTGACAACAGGA,mature-mt_tRNA-His-GTG	2.43896	0.000679287	up	397	31	85	166	1056	1268
GTTTACAAAAAACATTAGACTGTGAATCTGACAACAGGAA,mature-mt_tRNA-His-GTG	2.40545	0.000451027	up	168	20	47	87	402	650
GTTTACAAAAAACATTAGACTGTGAATCTGACAACAGGAAA,mature-mt_tRNA-His-GTG	2.64783	0.000481201	up	105	8	34	46	287	522
GTTTACAAAAAACATTAGACTGTGAATCTGACAACAGGAAAT,mature-mt_tRNA-His-GTG	2.30399	0.00201249	up	46	5	20	25	105	205
GTTTACAAAAAACATTAGACTGTGAATCTGACAACAGGAAATA,mature-mt_tRNA-His-GTG	2.18365	0.00200497	up	736	72	202	275	1322	2570
GTTTACAAAAAACATTAGACTGTGAATCTGACAACAGGAAATAA,mature-mt_tRNA-His-GTG	2.64093	0.0104418	up	11	1	2	3	24	52
GTTTAGGTAGCACGGAGAATTTTGAATTCTTAAGTGTA,mature-mt_tRNA-Gln-TTG	2.33006	0.0209789	up	15	1	0	18	25	23
GTTTCCGTAGTGTAG,mature-tRNA-Val-CAC_5_end;mature-tRNA-Val-AAC_5_end;mature-tRNA-Gly-ACC_5_end	-1.1003	0.0184191	down	582	968	505	277	240	428
GTTTCCGTAGTGTAGTG,mature-tRNA-Val-CAC_5_end;mature-tRNA-Val-AAC_5_end;mature-tRNA-Gly-ACC_5_end	-1.2554	0.00207717	down	1553	1840	1197	536	591	768
GTTTCCGTAGTGTAGTGGTC,mature-tRNA-Val-CAC_5_end;mature-tRNA-Val-AAC_5_end	-1.18104	0.0348219	down	127	77	40	44	26	26
GTTTCCGTAGTGTAGTGGTTATCAC,mature-tRNA-Val-CAC_5_end;mature-tRNA-Val-AAC_5_end	-1.10275	0.0154323	down	393	391	181	158	105	154
GTTTCCGTAGTGTAGTGGTTATCACGTTCGCCTCA,mature-tRNA-Val-CAC_5_end	1.13561	0.00720165	up	332	189	178	459	404	590
GTTTCCGTAGTGTAGTGGTTATCACGTTCGCCTCACA,mature-tRNA-Val-CAC_5_end	1.46966	0.0137506	up	60	15	17	69	57	101
GTTTCTGTAGTGTAGTGGTTATC,mature-tRNA-Val-CAC_5_end;mature-tRNA-Val-AAC_5_end	-1.40285	0.0423526	down	109	53	21	33	18	8
GTTTCTGTAGTTGAA,mature-mt_tRNA-Glu-TTC_5_end	-1.71712	0.000784465	down	180	289	131	54	41	82
GTTTCTGTAGTTGAAT,mature-mt_tRNA-Glu-TTC_5_end	-1.72436	0.000198356	down	405	653	384	124	121	190
GTTTCTGTAGTTGAATT,mature-mt_tRNA-Glu-TTC_5_end	-1.9155	7.56216e-06	down	2124	2298	1354	343	447	705
GTTTCTGTAGTTGAATTA,mature-mt_tRNA-Glu-TTC_5_end	-1.6532	0.000679485	down	1575	1934	989	292	320	778
GTTTCTGTAGTTGAATTAC,mature-mt_tRNA-Glu-TTC_5_end	-1.98152	9.7304e-06	down	7725	6496	2649	1387	911	1575
GTTTCTGTAGTTGAATTACA,mature-mt_tRNA-Glu-TTC_5_end	-1.05928	0.0258529	down	2455	3179	1776	542	1262	1762
GTTTCTGTAGTTGAATTACAAC,mature-mt_tRNA-Glu-TTC_5_end	-1.6221	0.0002474	down	1145	1325	498	220	301	395
GTTTCTGTAGTTGAATTACAACGATG,mature-mt_tRNA-Glu-TTC_5_end	-1.10237	0.020225	down	1887	1585	838	265	790	891
TAAAAAAAAATTAATGATTTCGACTCATTAGATTA,mature-mt_tRNA-Arg-TCG	1.74482	0.0390916	up	31	1	12	15	42	81
TAAAAAAAATTAATGATTTCGACTCATTAGA,mature-mt_tRNA-Arg-TCG	1.85722	0.000926274	up	265	76	62	174	473	673
TAAAAAAAATTAATGATTTCGACTCATTAGATT,mature-mt_tRNA-Arg-TCG	1.84814	0.00220788	up	106	26	27	80	137	298
TAAAAAAAATTAATGATTTCGACTCATTAGATTA,mature-mt_tRNA-Arg-TCG	2.20532	0.000381082	up	880	132	201	687	1254	2991
TAAAAAAAATTAATGATTTCGACTCATTAGATTAT,mature-mt_tRNA-Arg-TCG	2.59474	0.00698576	up	9	1	3	8	17	48
TAAAAAAAATTAATGATTTCGACTCATTAGATTATG,mature-mt_tRNA-Arg-TCG	2.13647	0.000751849	up	73	23	17	54	118	277
TAAAAAAAATTAATGATTTCGACTCATTAGATTATGA,mature-mt_tRNA-Arg-TCG	1.9195	0.0360062	up	20	3	4	16	8	65
TAAAGCAATTGATTTGCATTCAATAGATGTAGGATG,mature-mt_tRNA-Ala-TGC	1.43783	0.0194756	up	248	35	67	306	139	370
TAAAGCAATTGATTTGCATTCAATAGATGTAGGATGAAGT,mature-mt_tRNA-Ala-TGC	2.23214	0.0184552	up	17	0	6	23	12	62
TAAAGTTAGAGACCTTAAAATCTCCATAGTGACCA,mature-mt_tRNA-Lys-TTT_CCA_end	1.77112	0.000132678	up	140	63	45	232	230	307
TAAATTATAGATCAATAATCTATATAT,mature-mt_tRNA-Asp-GTC	1.55865	0.0113632	up	42	15	12	30	91	69
TAAATTATAGATCAATAATCTATATATC,mature-mt_tRNA-Asp-GTC	1.50059	0.0298394	up	22	13	4	30	43	27
TAAATTATAGATCAATAATCTATATATCT,mature-mt_tRNA-Asp-GTC	1.90169	0.000916786	up	50	17	10	70	89	97
TAACAAAGCAAAGCACTGA,mature-mt_tRNA-Phe-GAA	-1.7125	0.0417495	down	22	16	25	10	3	6
TAACTGACTTCCAATTAGTAGATTCTGAATAAACC,mature-mt_tRNA-Gly-TCC	1.50003	0.0447147	up	47	4	9	33	40	74
TAACTGACTTCCAATTAGTAGATTCTGAATAAACCC,mature-mt_tRNA-Gly-TCC	2.28055	0.00376697	up	11	3	5	20	23	44
TAAGTTAAAGTTAGAGACCTTAAAATCTCCATAGTGACCA,mature-mt_tRNA-Lys-TTT_CCA_end	1.90854	0.0337939	up	11	5	2	16	9	35
TAATAGGGTATTTAGCTGTTAACT,mature-mt_tRNA-Asn-GTT	1.66957	0.0291185	up	12	6	5	15	31	24
TAATAGGGTATTTAGCTGTTAACTAAAT,mature-mt_tRNA-Asn-GTT	1.78445	0.00233338	up	27	20	17	32	111	78
TAATAGGGTATTTAGCTGTTAACTAAATTTTCG,mature-mt_tRNA-Asn-GTT	1.97582	0.0143954	up	8	4	6	18	17	34
TAATAGGGTATTTAGCTGTTAACTAAATTTTCGT,mature-mt_tRNA-Asn-GTT	2.38512	0.00252326	up	27	2	8	16	80	84
TAATAGGGTATTTAGCTGTTAACTAAATTTTCGTA,mature-mt_tRNA-Asn-GTT	3.55247	8.92919e-07	up	35	3	7	46	184	245
TAATAGGGTATTTAGCTGTTAACTAAATTTTCGTAG,mature-mt_tRNA-Asn-GTT	2.88432	0.000265247	up	19	1	4	24	65	71
TAATATAACTGACTTCCAATTAGTAGATTCTGAATA,mature-mt_tRNA-Gly-TCC	1.8624	0.0350848	up	28	3	1	24	23	48
TAATTAGTTTAAAAAAAATTAAT,mature-mt_tRNA-Arg-TCG	1.33995	0.0374776	up	48	36	28	18	140	128
TACAAAAAACATTAGACTGTGAATCTGACAA,mature-mt_tRNA-His-GTG	1.23148	0.033226	up	301	87	171	132	731	457
TACAAAAAACATTAGACTGTGAATCTGACAAC,mature-mt_tRNA-His-GTG	1.11593	0.0294637	up	519	117	193	329	661	684
TACAAAAAACATTAGACTGTGAATCTGACAACA,mature-mt_tRNA-His-GTG	1.68297	0.00405149	up	108	32	73	77	325	292
TACAAAAAACATTAGACTGTGAATCTGACAACAG,mature-mt_tRNA-His-GTG	1.93963	0.00530451	up	34	6	16	22	106	82
TACAAAAAACATTAGACTGTGAATCTGACAACAGG,mature-mt_tRNA-His-GTG	2.06897	0.00120804	up	137	20	52	81	391	363
TACAAAAAACATTAGACTGTGAATCTGACAACAGGA,mature-mt_tRNA-His-GTG	2.66295	6.76007e-05	up	1346	150	423	810	5409	5139
TACAAAAAACATTAGACTGTGAATCTGACAACAGGAA,mature-mt_tRNA-His-GTG	2.94814	1.30704e-05	up	419	44	153	337	1786	2358
TACAAAAAACATTAGACTGTGAATCTGACAACAGGAAA,mature-mt_tRNA-His-GTG	2.58916	0.000129663	up	223	33	77	120	679	1080
TACAAAAAACATTAGACTGTGAATCTGACAACAGGAAAT,mature-mt_tRNA-His-GTG	3.08285	3.7354e-06	up	120	23	50	107	481	971
TACAAAAAACATTAGACTGTGAATCTGACAACAGGAAATA,mature-mt_tRNA-His-GTG	2.5676	0.000190381	up	1709	163	529	1072	3918	8039
TACAAAAAACATTAGACTGTGAATCTGACAACAGGAAATAA,mature-mt_tRNA-His-GTG	3.35817	0.000193281	up	19	1	4	8	72	143
TACAAAAAACATTAGACTGTGAATCTGACAACAGGAAATAAA,mature-mt_tRNA-His-GTG	3.21327	0.0269984	up	17	0	10	16	68	163
TACACCCAGAAGATTTCATGACCAATGAACACTCTGAC,mature-mt_tRNA-Val-TAC	1.57415	0.0397202	up	79	3	12	95	79	57
TACACCCAGAAGATTTCATGACCAATGAACACTCTGACC,mature-mt_tRNA-Val-TAC	2.46338	0.000447214	up	14	3	10	30	74	45
TACACCCAGAAGATTTCATGACCAATGAACACTCTGACCA,mature-mt_tRNA-Val-TAC_CCA_end	2.70239	2.44054e-07	up	57	21	38	163	213	363
TAGAATTCTCGCCTGC,mature-tRNA-Gly-GCC	-1.58659	0.0359253	down	27	35	14	8	6	10
TAGAATTCTCGCCTGCC,mature-tRNA-Gly-GCC	-1.07377	0.0354317	down	88	160	112	51	60	64
TAGAGTAAATTATAGAGGTTCAAGCCCTCTT,mature-mt_tRNA-Ile-GAT	1.53574	0.0214609	up	34	10	6	34	42	52
TAGAGTAAATTATAGAGGTTCAAGCCCTCTTA,mature-mt_tRNA-Ile-GAT	2.39649	0.0032141	up	11	3	3	30	18	32
TAGATGGATAATTGTATCCCATAAACACCA,mature-mt_tRNA-Phe-GAA_CCA_end	1.053	0.016931	up	148	94	87	205	183	264
TAGATGTAGGATGAAGTCTTA,mature-mt_tRNA-Ala-TGC	-1.11507	0.0363389	down	75	85	45	28	27	36
TAGATTCTGAATAAACCCAGAAGAGAGTACCA,mature-mt_tRNA-Gly-TCC_CCA_end	1.17863	0.0306318	up	70	27	67	87	134	159
TAGATTGAAGCCAGTAATAGGGTATTTA,mature-mt_tRNA-Asn-GTT_5_end	1.92504	0.0174898	up	28	9	8	5	85	73
TAGCTCAGTGGTAGAGCATTTGACTGC,mature-tRNA-Cys-GCA	-1.36798	0.00606837	down	125	86	94	41	44	31
TAGGATAAGGTGTTT,mature-mt_tRNA-Gln-TTG_5_end	-2.14672	0.00160217	down	75	162	47	36	9	14
TAGGATAAGGTGTTTAG,mature-mt_tRNA-Gln-TTG_5_end	-1.25713	0.00917584	down	279	394	197	136	79	133
TAGGATAAGGTGTTTAGGT,mature-mt_tRNA-Gln-TTG_5_end	-1.12035	0.0276576	down	98	91	50	36	33	35
TAGGATAAGGTGTTTAGGTAGC,mature-mt_tRNA-Gln-TTG_5_end	-1.0315	0.0201892	down	1909	1217	496	569	565	451
TAGGATAAGGTGTTTAGGTAGCACGGAGAAT,mature-mt_tRNA-Gln-TTG_5_end	1.72559	0.00514248	up	21	18	15	24	79	77
TAGGATAAGGTGTTTAGGTAGCACGGAGAATTTTGAATT,mature-mt_tRNA-Gln-TTG_5_end	2.38594	0.0239899	up	13	0	1	10	19	33
TAGGATAAGGTGTTTAGGTAGCACGGAGAATTTTGAATTCTTA,mature-mt_tRNA-Gln-TTG_5_end	2.69137	0.00673631	up	7	1	3	19	6	40
TAGGGTATTTAGCTGTTAACTAAATTTTCGTAGGTT,mature-mt_tRNA-Asn-GTT	1.66794	0.0358623	up	19	5	3	22	20	33
TAGGGTATTTAGCTGTTAACTAAATTTTCGTAGGTTT,mature-mt_tRNA-Asn-GTT	1.71389	0.0418845	up	16	3	4	26	13	27
TAGTAAAATCAATTACATAACTTTGTC,mature-mt_tRNA-Asp-GTC	-1.60135	0.00613344	down	65	66	72	13	22	34
TAGTAGATTCTGAATAAACCCAGAAGAGAGTACCA,mature-mt_tRNA-Gly-TCC_CCA_end	1.53691	0.00212198	up	175	61	68	173	245	403
TAGTATAATTAATATAACTGACTTCC,mature-mt_tRNA-Gly-TCC	-1.47014	0.0371504	down	32	29	23	6	10	14
TAGTATAGTGGTGAGTATCCCCGCCTGTCA,mature-tRNA-Asp-GTC	2.29011	0.000926553	up	47	22	37	23	314	208
TATAACTGACTTCCAATTAGTAGATTCTGAATAAAC,mature-mt_tRNA-Gly-TCC	1.5941	0.0281513	up	27	8	8	19	29	71
TATAACTGACTTCCAATTAGTAGATTCTGAATAAACC,mature-mt_tRNA-Gly-TCC	2.74956	0.00146169	up	5	2	5	15	21	45
TATAATTAATATAACTGACTTCC,mature-mt_tRNA-Gly-TCC	-1.74826	0.0102811	down	41	39	26	9	16	6
TATTAAAGCATCTGGCCTAC,mature-mt_tRNA-Val-TAC	-1.58326	0.00615446	down	68	70	51	22	13	26
TCAAATCTCGGTGGAACC,mature-tRNA-Gln-CTG	-2.02393	0.016348	down	32	18	14	4	8	3
TCAATAGATGTAGGATGAAGTCTTACAGTCCTTACCA,mature-mt_tRNA-Ala-TGC_CCA_end	1.36793	0.0364993	up	37	11	16	59	26	65
TCAGTGGTAGAATTCTCGCCTGCC,mature-tRNA-Gly-GCC	-1.32211	0.00101334	down	1013	990	911	350	427	393
TCATGACCAATGAACACTCT,mature-mt_tRNA-Val-TAC	-1.6016	0.000105928	down	629	469	456	124	185	199
TCATGACCAATGAACACTCTG,mature-mt_tRNA-Val-TAC	-1.70298	0.0273115	down	29	19	21	6	10	5
TCATGACCAATGAACACTCTGA,mature-mt_tRNA-Val-TAC_3_end	-1.43735	0.0444223	down	206	53	49	54	37	6
TCATGACCAATGAACACTCTGAC,mature-mt_tRNA-Val-TAC	-1.51743	0.000276549	down	836	464	413	198	215	151
TCATGTCATTGGTCGCAGTTGAATGCTGTGTAGA,mature-mt_tRNA-Glu-TTC	1.29645	0.0246718	up	39	13	21	47	67	58
TCATGTCATTGGTCGCAGTTGAATGCTGTGTAGAAATACC,mature-mt_tRNA-Glu-TTC	1.83799	0.010285	up	55	7	12	119	38	63
TCATGTCATTGGTCGCAGTTGAATGCTGTGTAGAAATACCA,mature-mt_tRNA-Glu-TTC_CCA_end	2.66237	2.16973e-07	up	50	23	27	131	174	303
TCATTAGATTATGATGATGTTCATAATTACCAACCA,mature-mt_tRNA-Arg-TCG_CCA_end	1.78322	0.0280994	up	24	4	2	28	27	32
TCATTGGTCGCAGTTGAATGCTGTGTAGAAATACCA,mature-mt_tRNA-Glu-TTC_CCA_end	1.82048	0.00063322	up	40	19	16	62	89	98
TCCAATTAGTAGATTCTGAATAAACCCAGAAGAGAGT,mature-mt_tRNA-Gly-TCC	1.52769	0.046866	up	34	2	10	40	32	45
TCCAATTAGTAGATTCTGAATAAACCCAGAAGAGAGTACC,mature-mt_tRNA-Gly-TCC	1.58784	0.0128118	up	73	11	23	111	56	115
TCCAATTAGTAGATTCTGAATAAACCCAGAAGAGAGTACCA,mature-mt_tRNA-Gly-TCC_CCA_end	2.07783	0.000773279	up	58	12	30	86	87	227
TCCATGGTGTAATGG,mature-tRNA-Gln-CTG	-1.50232	0.00546258	down	240	480	100	65	119	95
TCCCACATGGTCTAGCGGTTAGGATTCCTGG,mature-tRNA-Glu-TTC_5_end	1.04657	0.0214427	up	142	67	69	132	201	215
TCCCACTCCTGACACC,mature-tRNA-Leu-CAG	-1.4257	0.0307555	down	29	106	47	13	33	25
TCCCACTTCTGACACC,mature-tRNA-Leu-CAG;mature-tRNA-Leu-CAA	-1.4286	0.0114706	down	275	511	255	42	234	129
TCCCACTTCTGACACCA,mature-tRNA-Leu-CAG_CCA_end;mature-tRNA-Leu-CAA_CCA_end	-1.2681	0.0395998	down	492	1431	685	88	500	563
TCCCAGAGGTTCAAATCCTCTCCCTAATACCA,mature-mt_tRNA-Leu-TAA_CCA_end	1.34588	0.00240773	up	231	147	188	335	479	629
TCCCAGCGGTGCCTCC,mature-tRNA-Thr-AGT	-2.73268	0.000418965	down	40	81	27	2	5	15
TCCCAGCGGTGCCTCCA,mature-tRNA-Thr-AGT_CCA_end	-1.16158	0.0393281	down	233	489	254	48	211	198
TCCCATCCTCGTCGC,mature-tRNA-Ser-GCT	-1.72666	0.00660593	down	53	47	28	13	16	8
TCCCATCCTCGTCGCC,mature-tRNA-Ser-GCT	-1.32876	0.0283348	down	233	706	387	53	297	221
TCCCTGGTGGTCTAG,mature-tRNA-Glu-TTC_5_end;mature-tRNA-Glu-CTC_5_end	-1.12139	0.0411776	down	75	149	66	53	41	36
TCCCTGGTGGTCTAGTGGTTAGGATTCGGC,mature-tRNA-Glu-CTC_5_end	1.60392	0.00178424	up	59	39	44	70	186	180
TCCCTGGTGGTCTAGTGGTTAGGATTCGGCGC,mature-tRNA-Glu-CTC_5_end	1.8864	0.00027399	up	78	32	40	99	288	157
TCCCTGGTGGTCTAGTGGTTAGGATTCGGCGCT,mature-tRNA-Glu-CTC_5_end	1.46085	0.0047011	up	271	74	99	214	606	335
TCCCTGGTGGTCTAGTGGTTAGGATTCGGCGCTCT,mature-tRNA-Glu-CTC_5_end	1.94115	0.000743307	up	94	40	23	65	294	204
TCCCTGGTGGTCTAGTGGTTAGGATTCGGCGCTCTC,mature-tRNA-Glu-CTC_5_end	1.62604	0.00520809	up	95	33	55	58	263	243
TCCCTTCGTGGTCGCC,mature-tRNA-Arg-TCG;mature-tRNA-Arg-CCG	-1.35582	0.0387572	down	28	46	33	10	18	15
TCCTCGTTAGTATAGTG,mature-tRNA-Asp-GTC_5_end	-1.01526	0.0320436	down	196	265	108	62	105	107
TCCTCGTTAGTATAGTGGT,mature-tRNA-Asp-GTC_5_end	-1.62635	0.0103679	down	670	1057	219	358	109	86
TCCTCGTTAGTATAGTGGTGAGTATCCCCGCCTGTCA,mature-tRNA-Asp-GTC_5_end	1.79251	0.00339661	up	49	15	17	39	85	138
TCCTCGTTAGTATAGTGGTGAGTATCCCCGCCTGTCAC,mature-tRNA-Asp-GTC_5_end	1.90914	0.0263213	up	11	4	6	7	22	48
TCCTCGTTAGTATAGTGGTGAGTATCCCCGCCTGTCACG,mature-tRNA-Asp-GTC_5_end	2.15683	0.0107021	up	16	2	8	16	19	75
TCCTCGTTAGTATAGTGGTT,mature-tRNA-Asp-GTC_5_end	-1.78053	0.039276	down	28	39	10	13	3	4
TCCTGTTCGTGACGCC,mature-tRNA-Ser-CGA	-1.53936	0.0268067	down	45	107	74	5	37	42
TCCTGTTCGTGACGCCA,mature-tRNA-Ser-CGA_CCA_end	-1.13857	0.0242531	down	168	327	175	63	107	140
TCGAAACCATCCTCTGCTAC,mature-tRNA-iMet-CAT	-1.6585	0.0247127	down	40	31	15	4	12	10
TCGACTCATTAGATTATGATGA,mature-mt_tRNA-Arg-TCG	1.11599	0.0185657	up	207	172	160	188	430	562
TCGACTCATTAGATTATGATGATGTTCATAATTACCAACC,mature-mt_tRNA-Arg-TCG	1.68544	0.033374	up	37	4	5	63	31	27
TCGACTCATTAGATTATGATGATGTTCATAATTACCAACCA,mature-mt_tRNA-Arg-TCG_CCA_end	1.84077	0.00242716	up	34	14	15	62	41	106
TCGACTCCTGGCTGGCTCGCCA,mature-tRNA-Arg-ACG_CCA_end	1.8791	0.0282782	up	6	8	7	5	46	31
TCGTTAGCGCAGTAGGTAGCGCGTC,mature-tRNA-Met-CAT	-1.44814	0.0364963	down	104	64	21	31	7	21
TCTAGTGGTTAGGATTCGGCGCT,mature-tRNA-Glu-CTC	1.06672	0.0297734	up	624	230	229	425	1210	519
TCTAGTGGTTAGGATTCGGCGCTCT,mature-tRNA-Glu-CTC	1.44151	0.00882814	up	43	39	29	54	177	74
TCTAGTGGTTAGGATTCGGCGCTCTCA,mature-tRNA-Glu-CTC	1.88755	0.0359513	up	9	9	2	5	44	23
TCTAGTGGTTAGGATTCGGCGCTCTCAC,mature-tRNA-Glu-CTC	1.92691	0.0146276	up	8	7	7	9	42	35
TCTAGTGGTTAGGATTCGGCGCTCTCACC,mature-tRNA-Glu-CTC	2.65866	0.000788581	up	7	6	7	9	66	57
TCTCGGTGGAACCTC,mature-tRNA-Gln-CTG	-2.14564	0.00948686	down	35	28	10	6	5	4
TCTCGGTGGAACCTCC,mature-tRNA-Gln-CTG	-1.42291	0.0170008	down	79	160	37	25	48	27
TCTCGGTGGAACCTCCA,mature-tRNA-Gln-CTG_CCA_end	-1.1356	0.0120081	down	745	1171	455	293	317	433
TCTTAAGGTGATATTCATGTCGAATT,mature-mt_tRNA-Cys-GCA	1.56268	0.0437823	up	23	7	8	8	57	43
TGAATATAGTTTACAAAAAACATTAG,mature-mt_tRNA-His-GTG	1.77571	0.00998781	up	78	82	98	34	598	342
TGAATATAGTTTACAAAAAACATTAGA,mature-mt_tRNA-His-GTG	1.78033	0.00298656	up	135	86	78	67	608	370
TGAATATAGTTTACAAAAAACATTAGACTGTGA,mature-mt_tRNA-His-GTG	1.42126	0.0214222	up	300	84	137	92	741	542
TGAATATAGTTTACAAAAAACATTAGACTGTGAA,mature-mt_tRNA-His-GTG	1.9264	0.00765124	up	43	15	15	12	150	107
TGAATATAGTTTACAAAAAACATTAGACTGTGAAT,mature-mt_tRNA-His-GTG	2.2702	0.0028771	up	37	3	6	28	64	102
TGAATATAGTTTACAAAAAACATTAGACTGTGAATC,mature-mt_tRNA-His-GTG	2.17928	0.00107423	up	29	9	9	23	91	87
TGAATATAGTTTACAAAAAACATTAGACTGTGAATCT,mature-mt_tRNA-His-GTG	1.91965	0.0184116	up	40	3	4	19	79	56
TGAATATAGTTTACAAAAAACATTAGACTGTGAATCTGACA,mature-mt_tRNA-His-GTG	1.73609	0.0192158	up	43	4	11	25	56	93
TGAATCTGACAACAGGAAATAAACCTCCTTATTCACCCC,mature-mt_tRNA-His-GTG	1.79379	0.00312445	up	142	21	67	254	138	339
TGAATCTGACAACAGGAAATAAACCTCCTTATTCACCCCA,mature-mt_tRNA-His-GTG_CCA_end	1.85258	0.00391684	up	27	8	13	53	35	73
TGACAACAGGAAATAAACCTCCTTATTCACCCCA,mature-mt_tRNA-His-GTG_CCA_end	2.09393	0.000964708	up	14	11	9	34	41	66
TGACCAATGAACACTCTGA,mature-mt_tRNA-Val-TAC_3_end	-1.84742	0.00794939	down	183	73	56	47	23	5
TGACTTCCAATTAGTAGATTCTGAATAAACC,mature-mt_tRNA-Gly-TCC	1.27774	0.0274774	up	60	19	33	41	121	105
TGACTTCCAATTAGTAGATTCTGAATAAACCCAGA,mature-mt_tRNA-Gly-TCC	1.79208	0.0385746	up	27	4	1	20	26	46
TGATATTCATGTCGAATTGC,mature-mt_tRNA-Cys-GCA	-1.35173	0.0315761	down	73	55	28	10	35	14
TGCAAGAACTGCTAATTCATGCTTCCATGTTT,mature-mt_tRNA-Ser-GCT	1.15125	0.0370594	up	42	28	15	56	50	68
TGCCGAGGTTGTGAGTTCGAGCCTC,mature-tRNA-Ile-TAT	-3.02903	0.000662543	down	65	41	8	4	1	7
TGCTTAGATGGATAATTGTATCCCATAAACACC,mature-mt_tRNA-Phe-GAA	1.86535	0.00347137	up	27	11	9	70	38	45
TGCTTAGATGGATAATTGTATCCCATAAACACCA,mature-mt_tRNA-Phe-GAA_CCA_end	2.06556	0.000112659	up	93	33	41	222	121	297
TGCTTCCATGTTTAAAAACATGGCTTTCTTACC,mature-mt_tRNA-Ser-GCT	1.48409	0.0493906	up	41	9	8	81	21	32
TGCTTCCATGTTTAAAAACATGGCTTTCTTACCA,mature-mt_tRNA-Ser-GCT_CCA_end	1.5569	0.0112299	up	189	39	51	271	94	341
TGGGGAGTAGCTCCTT,mature-mt_tRNA-Pro-TGG	1.09075	0.0293245	up	387	378	241	361	1350	460
TGGGGAGTAGCTCCTTCTT,mature-mt_tRNA-Pro-TGG	1.0626	0.0363613	up	249	243	226	254	959	359
TGGGGAGTAGCTCCTTCTTC,mature-mt_tRNA-Pro-TGG	1.28077	0.0141325	up	176	128	102	169	632	192
TGGGGAGTAGCTCCTTCTTCTT,mature-mt_tRNA-Pro-TGG	1.32545	0.0219186	up	49	49	60	59	261	107
TGGGGAGTAGCTCCTTCTTCTTGACC,mature-mt_tRNA-Pro-TGG	1.17888	0.0177884	up	1335	744	764	1027	4003	1442
TGGGGAGTAGCTCCTTCTTCTTGACCA,mature-mt_tRNA-Pro-TGG_CCA_end	2.14391	6.28369e-05	up	1194	1233	1097	1662	10039	4806
TGGGTTCGAGCCCCACGTTGGGCGC,mature-tRNA-Lys-CTT	-1.61405	0.0248106	down	55	23	20	8	16	6
TGGGTTCGAGTCCCATCTGGGTCG,mature-tRNA-Arg-CCG_3_end	-1.95982	0.0132506	down	115	14	15	10	12	9
TGGTAATTAGTTTAA,mature-mt_tRNA-Arg-TCG_5_end	-2.18961	0.00480021	down	37	75	20	4	5	19
TGGTAATTAGTTTAAA,mature-mt_tRNA-Arg-TCG_5_end	-1.15575	0.031941	down	204	316	141	43	91	161
TGGTAATTAGTTTAAAAAAAATTAATGATTTCGACTCATTAGA,mature-mt_tRNA-Arg-TCG_5_end	1.34041	0.0491479	up	221	38	36	89	118	434
TGGTAGAATTCTCGCCTGCCACGCGGGAG,mature-tRNA-Gly-GCC	2.03464	0.00796242	up	54	15	20	9	207	140
TGGTAGAATTCTCGCCTGCCACGCGGGAGG,mature-tRNA-Gly-GCC	2.05199	0.00311281	up	257	119	130	58	1345	725
TGGTAGAATTCTCGCCTGCCACGCGGGAGGC,mature-tRNA-Gly-GCC	2.34666	0.00298668	up	35	11	13	7	184	104
TGGTAGAATTCTCGCCTGCCACGCGGGAGGCC,mature-tRNA-Gly-GCC	1.69249	0.0179675	up	42	9	23	16	132	92
TGGTAGAATTCTCGCCTGCCACGCGGGAGGCCC,mature-tRNA-Gly-GCC	2.1259	0.00159299	up	69	18	27	31	303	153
TGGTCGCAGTTGAATGCTGTGTAGAAA,mature-mt_tRNA-Glu-TTC	-1.30121	0.0390751	down	41	55	33	17	11	23
TGGTCTAGTGGTTAGGATTCGGC,mature-tRNA-Glu-CTC	1.53242	0.00340682	up	34	32	22	60	121	71
TGGTCTAGTGGTTAGGATTCGGCGC,mature-tRNA-Glu-CTC	1.06453	0.0410718	up	78	31	36	69	142	80
TGGTCTAGTGGTTAGGATTCGGCGCT,mature-tRNA-Glu-CTC	1.46782	0.00383149	up	340	117	171	294	957	456
TGGTCTAGTGGTTAGGATTCGGCGCTCT,mature-tRNA-Glu-CTC	1.31961	0.027157	up	41	24	43	38	156	92
TGGTCTAGTGGTTAGGATTCGGCGCTCTCACC,mature-tRNA-Glu-CTC	2.71757	0.00652612	up	7	0	3	9	28	26
TGGTGAGCATAGCTGCCTTCCAAGCAGTTGACC,mature-tRNA-Gly-TCC	1.71812	0.00595705	up	43	20	13	31	143	65
TGGTGAGCATAGCTGCCTTCCAAGCAGTTGACCCG,mature-tRNA-Gly-TCC	2.41215	0.0031415	up	36	6	8	8	153	88
TGGTGAGCATAGCTGCCTTCCAAGCAGTTGACCCGG,mature-tRNA-Gly-TCC	3.27342	0.000453221	up	6	1	5	6	82	34
TGGTTAGGATTCGGCGCTCTCAC,mature-tRNA-Glu-CTC	1.41151	0.0353875	up	13	10	18	27	56	32
TGGTTAGGATTCGGCGCTCTCACC,mature-tRNA-Glu-CTC	1.91942	0.0020965	up	55	67	59	45	385	301
TGGTTCAGTGGTAGAATTCTCGCCTGCCA,mature-tRNA-Gly-GCC	1.10254	0.0114407	up	1155	646	887	1301	1929	2542
TGGTTCAGTGGTAGAATTCTCGCCTGCCAC,mature-tRNA-Gly-GCC	1.01292	0.0261376	up	1103	462	386	663	1609	1423
TGGTTCAGTGGTAGAATTCTCGCCTGCCACGC,mature-tRNA-Gly-GCC	1.23742	0.0191885	up	252	56	58	199	324	243
TGGTTCAGTGGTAGAATTCTCGCCTGCCACGCG,mature-tRNA-Gly-GCC	2.35255	0.00420482	up	11	4	2	14	35	31
TGGTTCAGTGGTAGAATTCTCGCCTGCCACGCGG,mature-tRNA-Gly-GCC	1.83236	0.00289341	up	651	109	188	285	1449	1393
TGGTTCAGTGGTAGAATTCTCGCCTGCCACGCGGG,mature-tRNA-Gly-GCC	1.69695	0.0104579	up	71	10	32	39	170	146
TGGTTCAGTGGTAGAATTCTCGCCTGCCACGCGGGA,mature-tRNA-Gly-GCC	2.5453	0.000745545	up	20	3	5	19	78	55
TGGTTCAGTGGTAGAATTCTCGCCTGCCACGCGGGAGG,mature-tRNA-Gly-GCC	3.90175	7.53509e-06	up	8	1	3	10	83	81
TGTAAACCTGAAATGAAGATCTT,mature-mt_tRNA-Thr-TGT	-1.42552	0.0298553	down	70	80	51	37	7	26
TGTAAACCTGAAATGAAGATCTTCTCTTCTCAAGACACCA,mature-mt_tRNA-Thr-TGT_CCA_end	2.18306	7.776e-05	up	106	26	52	261	157	355
TGTAGTGGTTATCACGTTCGCCT,mature-tRNA-Val-CAC;mature-tRNA-Val-AAC	-3.53662	0.00025369	down	42	24	11	2	2	2
TGTCAAAGTTAAATTATAGATCAATAATCTATA,mature-mt_tRNA-Asp-GTC	1.6176	0.0323665	up	26	6	4	40	24	30
TGTCAAAGTTAAATTATAGATCAATAATCTATATATCTTACCA,mature-mt_tRNA-Asp-GTC_CCA_end	2.0216	0.0285957	up	11	2	3	11	13	35
TGTCACGCGGGAGACCGGGGTTCGATTCCCCGACGGG,mature-tRNA-Asp-GTC	1.57072	0.0166223	up	59	6	20	66	71	91
TGTCATTGGTCGCAGTTGAATGCTGTGTAGAAATACCA,mature-mt_tRNA-Glu-TTC_CCA_end	1.99684	4.16769e-05	up	981	272	483	1945	1664	2868
TGTGAATCTGACAACAGGAAA,mature-mt_tRNA-His-GTG	1.20222	0.00669758	up	680	557	599	809	2135	1417
TGTTCCCAGAGGTTCAAATCCTCTCCCTAATACCA,mature-mt_tRNA-Leu-TAA_CCA_end	2.15212	0.00163326	up	26	3	14	46	56	80
TGTTTAGGTAGCACGGAGAATTTTGAATTCTTAAGTGTA,mature-mt_tRNA-Gln-TTG	2.17129	0.0452456	up	18	0	1	11	12	47
TTAAAAAAAAATTAATGATTTCGACTCATTAGATTA,mature-mt_tRNA-Arg-TCG	3.16894	0.000868519	up	7	0	4	9	34	54
TTAAAAAAAATTAATGATTTCGACTCATT,mature-mt_tRNA-Arg-TCG	1.57528	0.00734673	up	44	16	10	60	64	62
TTAAAAAAAATTAATGATTTCGACTCATTAG,mature-mt_tRNA-Arg-TCG	1.77016	0.0216366	up	11	5	9	15	23	47
TTAAAAAAAATTAATGATTTCGACTCATTAGA,mature-mt_tRNA-Arg-TCG	2.27004	0.000262172	up	355	55	92	244	721	1221
TTAAAAAAAATTAATGATTTCGACTCATTAGAT,mature-mt_tRNA-Arg-TCG	2.50576	0.00365077	up	8	5	2	10	24	46
TTAAAAAAAATTAATGATTTCGACTCATTAGATT,mature-mt_tRNA-Arg-TCG	2.14534	0.000561327	up	163	40	47	133	208	660
TTAAAAAAAATTAATGATTTCGACTCATTAGATTA,mature-mt_tRNA-Arg-TCG	2.41448	0.000143725	up	758	127	204	630	1132	3436
TTAAAAAAAATTAATGATTTCGACTCATTAGATTAT,mature-mt_tRNA-Arg-TCG	2.67285	0.00438075	up	19	2	2	19	11	94
TTAAAAAAAATTAATGATTTCGACTCATTAGATTATG,mature-mt_tRNA-Arg-TCG	2.37515	0.000153909	up	239	46	73	212	373	1102
TTAAAGCAATTGATTTGCATTCAATAGATGTAGGATG,mature-mt_tRNA-Ala-TGC	1.66659	0.0183342	up	88	6	20	112	60	135
TTAAAGCAATTGATTTGCATTCAATAGATGTAGGATGA,mature-mt_tRNA-Ala-TGC	2.19532	0.0302267	up	15	0	2	15	14	37
TTAAAGCATCTGGCCTAC,mature-mt_tRNA-Val-TAC	-1.74739	0.00918406	down	29	83	45	21	14	12
TTAAAGCATCTGGCCTACACCCAGAAGATTTCATGA,mature-mt_tRNA-Val-TAC	1.62015	0.017624	up	34	8	7	46	32	53
TTAAAGCATCTGGCCTACACCCAGAAGATTTCATGAC,mature-mt_tRNA-Val-TAC	1.9145	0.00438912	up	20	5	9	38	43	39
TTAAAGCATCTGGCCTACACCCAGAAGATTTCATGACC,mature-mt_tRNA-Val-TAC	1.71823	0.00752445	up	33	13	6	45	41	65
TTAAAGTTAGAGACCTTAAAATCTCCATAGTGACCA,mature-mt_tRNA-Lys-TTT_CCA_end	1.96412	4.40181e-05	up	97	48	35	136	230	291
TTAAATTATAGATCAATAATCTATATA,mature-mt_tRNA-Asp-GTC	1.60625	0.0217311	up	45	10	4	40	56	57
TTAAATTATAGATCAATAATCTATATAT,mature-mt_tRNA-Asp-GTC	1.8272	0.004267	up	24	8	9	31	58	48
TTAAATTATAGATCAATAATCTATATATC,mature-mt_tRNA-Asp-GTC	2.33132	0.00540274	up	12	8	0	25	38	26
TTAAATTATAGATCAATAATCTATATATCT,mature-mt_tRNA-Asp-GTC	1.96496	0.0110029	up	12	4	6	17	24	41
TTAATATAACTGACTTCCAATTAGTAGATT,mature-mt_tRNA-Gly-TCC	1.42928	0.0442044	up	13	25	5	19	51	43
TTACAAAAAACATTAGACTGTGAATCTGACA,mature-mt_tRNA-His-GTG	1.1334	0.0350958	up	307	144	237	172	765	622
TTACAAAAAACATTAGACTGTGAATCTGACAA,mature-mt_tRNA-His-GTG	1.4366	0.0133123	up	137	48	82	70	369	289
TTACAAAAAACATTAGACTGTGAATCTGACAAC,mature-mt_tRNA-His-GTG	1.19803	0.0184385	up	452	106	120	317	528	552
TTACAAAAAACATTAGACTGTGAATCTGACAACA,mature-mt_tRNA-His-GTG	1.65545	0.00578839	up	51	25	36	35	174	151
TTACAAAAAACATTAGACTGTGAATCTGACAACAG,mature-mt_tRNA-His-GTG	2.52323	0.00112618	up	30	5	15	12	161	114
TTACAAAAAACATTAGACTGTGAATCTGACAACAGG,mature-mt_tRNA-His-GTG	2.47611	0.000119326	up	162	22	58	116	589	569
TTACAAAAAACATTAGACTGTGAATCTGACAACAGGA,mature-mt_tRNA-His-GTG	2.81188	1.4107e-05	up	267	37	58	204	933	1146
TTACAAAAAACATTAGACTGTGAATCTGACAACAGGAA,mature-mt_tRNA-His-GTG	2.63214	8.44085e-05	up	136	16	54	106	445	660
TTACAAAAAACATTAGACTGTGAATCTGACAACAGGAAA,mature-mt_tRNA-His-GTG	3.02649	2.09544e-05	up	87	8	29	72	315	552
TTACAAAAAACATTAGACTGTGAATCTGACAACAGGAAAT,mature-mt_tRNA-His-GTG	2.62623	6.95067e-05	up	64	13	43	71	220	450
TTACAAAAAACATTAGACTGTGAATCTGACAACAGGAAATA,mature-mt_tRNA-His-GTG	2.57245	0.000135919	up	734	88	235	446	1833	3520
TTACAAAAAACATTAGACTGTGAATCTGACAACAGGAAATAA,mature-mt_tRNA-His-GTG	3.38068	0.000178049	up	4	2	6	7	44	82
TTACAAAAAACATTAGACTGTGAATCTGACAACAGGAAATAAA,mature-mt_tRNA-His-GTG	4.06665	2.31492e-05	up	3	1	4	6	51	84
TTACAACGATGATTTTTCATGTCATTGGTCGCAGT,mature-mt_tRNA-Glu-TTC	2.24187	0.006843	up	9	4	3	18	17	35
TTACTCTGGTCTTGTAAACCTGAAAT,mature-mt_tRNA-Thr-TGT	1.45707	0.0124178	up	256	140	185	119	912	623
TTAGACTGTGAATCTGACAACAGGAAATAA,mature-mt_tRNA-His-GTG	1.50974	0.0194323	up	23	10	9	28	37	47
TTAGACTGTGAATCTGACAACAGGAAATAAA,mature-mt_tRNA-His-GTG	1.52288	0.0401155	up	11	11	14	10	51	49
TTAGATGGATAATTGTATCCCATAAACACCA,mature-mt_tRNA-Phe-GAA_CCA_end	1.18574	0.011183	up	231	98	106	325	223	365
TTAGATTATGATGATGTTCATAATTACCAACCA,mature-mt_tRNA-Arg-TCG_CCA_end	1.22741	0.0442026	up	20	15	16	37	35	45
TTAGTAGATTCTGAATAAACCCAGAAGAGAGTACCA,mature-mt_tRNA-Gly-TCC_CCA_end	1.77976	0.000991263	up	67	28	40	85	129	237
TTATAGAGGTTCAAGCCCTCTTATTTCTACCA,mature-mt_tRNA-Ile-GAT_CCA_end	1.76066	0.00168631	up	73	34	23	110	75	213
TTCAATAGATGTAGGATGAAGTCTTACAGTCCTTACCA,mature-mt_tRNA-Ala-TGC_CCA_end	1.69315	0.00236567	up	57	22	35	121	70	158
TTCAGTGGTAGAATTCTCGCCTGCCACGCGGGAGG,mature-tRNA-Gly-GCC	1.80227	0.0397607	up	36	2	13	6	84	80
TTCATGTCATTGGTCGCAGTTGAATGCTGTGTAGAAATACC,mature-mt_tRNA-Glu-TTC	2.10187	0.0242739	up	12	1	3	22	11	27
TTCATGTCATTGGTCGCAGTTGAATGCTGTGTAGAAATACCA,mature-mt_tRNA-Glu-TTC_CCA_end	2.7383	3.86619e-06	up	21	9	13	61	76	141
TTCCAATTAGTAGATTCTGAATAAACCCAGA,mature-mt_tRNA-Gly-TCC	1.40602	0.0406925	up	26	9	6	31	30	36
TTCCAATTAGTAGATTCTGAATAAACCCAGAAGAGAGTACCA,mature-mt_tRNA-Gly-TCC_CCA_end	1.77921	0.0188791	up	16	7	7	14	25	59
TTCCATAGTGTAGCGGTTATCACGTCTGCTTT,mature-tRNA-Val-TAC	1.47704	0.00428721	up	159	66	44	288	239	135
TTCCATAGTGTAGCGGTTATCACGTCTGCTTTA,mature-tRNA-Val-TAC	1.64884	0.00889518	up	33	8	11	44	51	54
TTCCATGTTTAAAAACATGGCTTTCTTACCA,mature-mt_tRNA-Ser-GCT_CCA_end	1.43307	0.036122	up	62	13	12	62	31	108
TTCCCAGAGGTTCAAATCCTCTCCCTAATACCA,mature-mt_tRNA-Leu-TAA_CCA_end	1.05891	0.025808	up	98	57	71	116	144	204
TTCCGTAGTGTAGTGGTTATC,mature-tRNA-Val-CAC;mature-tRNA-Val-AAC	-1.33605	0.0320462	down	191	174	36	75	35	27
TTCGAATCCCACTTCTGACACC,mature-tRNA-Leu-CAG;mature-tRNA-Leu-CAA	-1.39111	0.0379787	down	60	93	53	5	33	43
TTCGACTCATTAGATTATGATGATGTTCATAATTACCAACCA,mature-mt_tRNA-Arg-TCG_CCA_end	2.07841	0.00340025	up	21	8	6	44	21	67
TTCTCTTCTCAAGACACC,mature-mt_tRNA-Thr-TGT	-2.63998	0.0205502	down	49	24	1	4	6	0
TTGCAAGAACTGCTAATTCATGCTTCCATGTTT,mature-mt_tRNA-Ser-GCT	1.82388	0.0136812	up	12	4	8	23	34	26
TTGTAAACCTGAAATGAAGATCTTCTCTTCTCAAGA,mature-mt_tRNA-Thr-TGT	2.17567	0.0184186	up	13	1	2	23	18	21
TTGTAAACCTGAAATGAAGATCTTCTCTTCTCAAGACACCA,mature-mt_tRNA-Thr-TGT_CCA_end	2.23771	0.000396811	up	37	7	17	65	65	139
TTGTCAAAGTTAAATTATAGATC,mature-mt_tRNA-Asp-GTC	-1.42109	0.00429302	down	158	136	108	64	39	40
TTGTCAAAGTTAAATTATAGATCAATAATCTATA,mature-mt_tRNA-Asp-GTC	1.48354	0.0288391	up	68	14	8	82	43	83
TTGTCAAAGTTAAATTATAGATCAATAATCTATAT,mature-mt_tRNA-Asp-GTC	2.07138	0.00267313	up	26	7	5	38	36	67
TTGTCAAAGTTAAATTATAGATCAATAATCTATATA,mature-mt_tRNA-Asp-GTC	1.49398	0.0490506	up	46	9	4	59	24	52
TTGTCAAAGTTAAATTATAGATCAATAATCTATATATC,mature-mt_tRNA-Asp-GTC	1.94873	0.00902997	up	33	4	8	53	24	73
TTGTCAAAGTTAAATTATAGATCAATAATCTATATATCTTACCA,mature-mt_tRNA-Asp-GTC_CCA_end	1.90165	0.0448977	up	18	1	2	17	14	35
TTGTTCCCAGAGGTTCAAATCCTCTCCCTAATACCA,mature-mt_tRNA-Leu-TAA_CCA_end	2.37494	0.00645801	up	6	5	2	12	20	32
TTTAAAAAAAATTAATGATTTCGACTCATTAGA,mature-mt_tRNA-Arg-TCG	1.98957	0.00196879	up	110	20	35	75	152	373
TTTAAAAAAAATTAATGATTTCGACTCATTAGATT,mature-mt_tRNA-Arg-TCG	1.73705	0.0104103	up	54	13	20	30	68	173
TTTAAAAAAAATTAATGATTTCGACTCATTAGATTA,mature-mt_tRNA-Arg-TCG	2.35328	0.00177969	up	98	8	31	57	127	453
TTTAAAAAAAATTAATGATTTCGACTCATTAGATTATG,mature-mt_tRNA-Arg-TCG	2.05628	0.00420965	up	71	10	21	33	102	253
TTTACAAAAAACATTAGACTGTGAATCTGACAAC,mature-mt_tRNA-His-GTG	1.33634	0.0445299	up	69	20	17	22	94	130
TTTACAAAAAACATTAGACTGTGAATCTGACAACAGG,mature-mt_tRNA-His-GTG	2.70166	0.000199877	up	56	8	22	27	262	251
TTTACAAAAAACATTAGACTGTGAATCTGACAACAGGA,mature-mt_tRNA-His-GTG	2.90791	1.40481e-05	up	71	12	18	55	282	359
TTTACAAAAAACATTAGACTGTGAATCTGACAACAGGAA,mature-mt_tRNA-His-GTG	2.50184	0.00112386	up	26	6	9	13	67	139
TTTACAAAAAACATTAGACTGTGAATCTGACAACAGGAAA,mature-mt_tRNA-His-GTG	2.51537	0.00254704	up	24	2	8	12	52	117
TTTACAAAAAACATTAGACTGTGAATCTGACAACAGGAAAT,mature-mt_tRNA-His-GTG	3.31002	6.2433e-05	up	16	2	5	11	81	123
TTTACAAAAAACATTAGACTGTGAATCTGACAACAGGAAATA,mature-mt_tRNA-His-GTG	2.43999	0.000892165	up	87	9	40	44	229	438
TTTCATGACCAATGAACACTCTGA,mature-mt_tRNA-Val-TAC_3_end	-2.61311	0.00205427	down	60	19	12	5	5	3
TTTCATGTCATTGGTCGCAGTTGAATGCTGTGTAGAAATACCA,mature-mt_tRNA-Glu-TTC_CCA_end	2.86685	0.0026962	up	1	4	4	18	12	38
TTTGTCAAAGTTAAATTATAGATC,mature-mt_tRNA-Asp-GTC	-1.34286	0.00914353	down	104	82	67	37	35	24
TTTGTCAAAGTTAAATTATAGATCAATAATCTATA,mature-mt_tRNA-Asp-GTC	1.50664	0.0363522	up	25	6	8	36	21	42
TTTGTCAAAGTTAAATTATAGATCAATAATCTATATATCTTACCA,mature-mt_tRNA-Asp-GTC_CCA_end	2.43063	0.00565654	up	19	0	4	33	26	48
