# Supplementary material for: Curcumin improves atrial fibrillation susceptibility by regulating tsRNA expression in aging mouse atrium
Source: PeerJ. 2024 Jul 26;12:e17495. doi: 10.7717/peerj.17495 (PMC11285363; doi:10.7717/peerj.17495)
Supplement: Supplemental Information 3 [file peerj-12-17495-s003.xlsx]

## Sheet: 5m_tsRNAVS18m_tsRNA.All
seq_annotation	log2FoldChange	pvalue	18m1	18m2	18m3	5m1	5m2	5m3
AAAAAAAAATTAATGATTTCG,mature-mt_tRNA-Arg-TCG	1.03442	0.799879	0	0	0	0	0	1
AAAAAAAAATTAATGATTTCGACT,mature-mt_tRNA-Arg-TCG	3.65507	0.258269	0	0	0	9	0	0
AAAAAAAAATTAATGATTTCGACTC,mature-mt_tRNA-Arg-TCG	1.54457	0.666081	1	0	0	4	0	0
AAAAAAAAATTAATGATTTCGACTCA,mature-mt_tRNA-Arg-TCG	2.87537	0.266278	0	1	0	1	6	0
AAAAAAAAATTAATGATTTCGACTCATT,mature-mt_tRNA-Arg-TCG	-0.889136	0.827507	1	0	0	0	0	0
AAAAAAAAATTAATGATTTCGACTCATTAGA,mature-mt_tRNA-Arg-TCG	0.772519	0.714471	1	0	3	4	0	3
AAAAAAAAATTAATGATTTCGACTCATTAGATT,mature-mt_tRNA-Arg-TCG	-0.171521	0.93505	1	1	3	4	1	0
AAAAAAAAATTAATGATTTCGACTCATTAGATTA,mature-mt_tRNA-Arg-TCG	-1.69757	0.260261	1	12	8	6	1	0
AAAAAAAAATTAATGATTTCGACTCATTAGATTAT,mature-mt_tRNA-Arg-TCG	1.03442	0.799879	0	0	0	1	0	0
AAAAAAAAATTAATGATTTCGACTCATTAGATTATG,mature-mt_tRNA-Arg-TCG	-1.44333	0.658861	1	0	2	0	1	0
AAAAAAAAATTAATGATTTCGACTCATTAGATTATGA,mature-mt_tRNA-Arg-TCG	1.03442	0.799879	0	0	0	0	0	1
AAAAAAAAATTAATGATTTCGACTCATTAGATTATGATGA,mature-mt_tRNA-Arg-TCG	1.03442	0.799879	0	0	0	1	0	0
AAAAAAAATTAATGATT,mature-mt_tRNA-Arg-TCG	-1.96161	0.625864	2	0	0	0	0	0
AAAAAAAATTAATGATTT,mature-mt_tRNA-Arg-TCG	-0.564968	0.861828	13	0	1	14	0	0
AAAAAAAATTAATGATTTC,mature-mt_tRNA-Arg-TCG	5.13201	0.168249	0	0	0	5	13	0
AAAAAAAATTAATGATTTCG,mature-mt_tRNA-Arg-TCG	1.20448	0.653407	2	0	0	5	1	0
AAAAAAAATTAATGATTTCGA,mature-mt_tRNA-Arg-TCG	1.37352	0.500009	1	2	1	13	0	0
AAAAAAAATTAATGATTTCGAC,mature-mt_tRNA-Arg-TCG	0.00085533	0.999745	0	4	0	0	1	2
AAAAAAAATTAATGATTTCGACT,mature-mt_tRNA-Arg-TCG	0.615725	0.50166	16	6	9	40	10	5
AAAAAAAATTAATGATTTCGACTC,mature-mt_tRNA-Arg-TCG	1.10999	0.325329	6	3	6	27	9	1
AAAAAAAATTAATGATTTCGACTCA,mature-mt_tRNA-Arg-TCG	0.00875861	0.994199	9	6	10	28	3	0
AAAAAAAATTAATGATTTCGACTCAT,mature-mt_tRNA-Arg-TCG	-0.44057	0.862822	1	3	0	2	0	1
AAAAAAAATTAATGATTTCGACTCATT,mature-mt_tRNA-Arg-TCG	1.38099	0.220487	5	2	4	22	6	4
AAAAAAAATTAATGATTTCGACTCATTA,mature-mt_tRNA-Arg-TCG	0.206677	0.915172	3	0	3	6	0	2
AAAAAAAATTAATGATTTCGACTCATTAG,mature-mt_tRNA-Arg-TCG	1.03442	0.799879	0	0	0	1	0	0
AAAAAAAATTAATGATTTCGACTCATTAGA,mature-mt_tRNA-Arg-TCG	-0.0680003	0.951569	5	7	12	21	4	1
AAAAAAAATTAATGATTTCGACTCATTAGAT,mature-mt_tRNA-Arg-TCG	1.09362	0.732951	0	2	0	5	0	0
AAAAAAAATTAATGATTTCGACTCATTAGATT,mature-mt_tRNA-Arg-TCG	-0.256735	0.725798	18	16	42	39	15	12
AAAAAAAATTAATGATTTCGACTCATTAGATTA,mature-mt_tRNA-Arg-TCG	-1.41755	0.15397	5	22	47	26	3	2
AAAAAAAATTAATGATTTCGACTCATTAGATTAT,mature-mt_tRNA-Arg-TCG	2.49607	0.532374	0	0	0	4	0	0
AAAAAAAATTAATGATTTCGACTCATTAGATTATG,mature-mt_tRNA-Arg-TCG	-0.281305	0.836696	5	3	8	12	0	3
AAAAAAAATTAATGATTTCGACTCATTAGATTATGA,mature-mt_tRNA-Arg-TCG	-0.0124821	0.996319	0	1	2	2	0	1
AAAAAAAATTAATGATTTCGACTCATTAGATTATGAT,mature-mt_tRNA-Arg-TCG	-0.0252929	0.991884	4	0	0	4	0	1
AAAAAAAATTAATGATTTCGACTCATTAGATTATGATG,mature-mt_tRNA-Arg-TCG	-3.11334	0.34594	1	0	4	0	0	0
AAAAAAAATTAATGATTTCGACTCATTAGATTATGATGA,mature-mt_tRNA-Arg-TCG	-0.889136	0.827507	0	1	0	0	0	0
AAAAAAAATTAATGATTTCGACTCATTAGATTATGATGATG,mature-mt_tRNA-Arg-TCG	-0.889136	0.827507	0	1	0	0	0	0
AAAAAAAATTAATGATTTCGACTCATTAGATTATGATGATGT,mature-mt_tRNA-Arg-TCG	-1.51535	0.650253	2	0	1	1	0	0
AAAAAAAATTAATGATTTCGACTCATTAGATTATGATGATGTT,mature-mt_tRNA-Arg-TCG	1.00703	0.751097	0	0	2	5	0	0
AAAAAAATTAATGATTT,mature-mt_tRNA-Arg-TCG	1.60709	0.692322	0	0	0	2	0	0
AAAAAAATTAATGATTTCG,mature-mt_tRNA-Arg-TCG	-1.96161	0.625864	2	0	0	0	0	0
AAAAAAATTAATGATTTCGA,mature-mt_tRNA-Arg-TCG	1.86008	0.382075	3	0	0	14	1	0
AAAAAAATTAATGATTTCGAC,mature-mt_tRNA-Arg-TCG	0.194289	0.952126	1	0	1	3	0	0
AAAAAAATTAATGATTTCGACT,mature-mt_tRNA-Arg-TCG	0.457479	0.74708	9	4	0	18	3	1
AAAAAAATTAATGATTTCGACTC,mature-mt_tRNA-Arg-TCG	-1.75546	0.367637	6	2	1	2	1	0
AAAAAAATTAATGATTTCGACTCA,mature-mt_tRNA-Arg-TCG	-0.824978	0.547073	10	1	12	14	2	0
AAAAAAATTAATGATTTCGACTCAT,mature-mt_tRNA-Arg-TCG	2.09257	0.603263	0	0	0	3	0	0
AAAAAAATTAATGATTTCGACTCATT,mature-mt_tRNA-Arg-TCG	0.831689	0.523161	1	6	4	16	2	3
AAAAAAATTAATGATTTCGACTCATTA,mature-mt_tRNA-Arg-TCG	1.03442	0.799879	0	0	0	1	0	0
AAAAAAATTAATGATTTCGACTCATTAG,mature-mt_tRNA-Arg-TCG	2.18517	0.586649	0	0	0	0	0	2
AAAAAAATTAATGATTTCGACTCATTAGA,mature-mt_tRNA-Arg-TCG	-1.18393	0.329949	4	4	15	5	3	2
AAAAAAATTAATGATTTCGACTCATTAGAT,mature-mt_tRNA-Arg-TCG	-1.96161	0.625864	2	0	0	0	0	0
AAAAAAATTAATGATTTCGACTCATTAGATT,mature-mt_tRNA-Arg-TCG	-0.935053	0.539749	4	0	12	6	1	2
AAAAAAATTAATGATTTCGACTCATTAGATTA,mature-mt_tRNA-Arg-TCG	-3.06465	0.40426	0	0	5	0	0	0
AAAAAAATTAATGATTTCGACTCATTAGATTATG,mature-mt_tRNA-Arg-TCG	-0.447873	0.80128	1	1	7	5	0	2
AAAAAAATTAATGATTTCGACTCATTAGATTATGA,mature-mt_tRNA-Arg-TCG	2.09257	0.603263	0	0	0	3	0	0
AAAAAAATTAATGATTTCGACTCATTAGATTATGAT,mature-mt_tRNA-Arg-TCG	-1.69942	0.674478	0	1	1	0	0	0
AAAAAAATTAATGATTTCGACTCATTAGATTATGATG,mature-mt_tRNA-Arg-TCG	0.0726449	0.985796	0	0	1	1	0	0
AAAAAAATTAATGATTTCGACTCATTAGATTATGATGA,mature-mt_tRNA-Arg-TCG	1.03442	0.799879	0	0	0	1	0	0
AAAAAAATTAATGATTTCGACTCATTAGATTATGATGATGT,mature-mt_tRNA-Arg-TCG	0.0726449	0.985796	0	0	1	1	0	0
AAAAAAATTAATGATTTCGACTCATTAGATTATGATGATGTT,mature-mt_tRNA-Arg-TCG	-0.209471	0.956756	0	0	2	2	0	0
AAAAAACATTAGACT,mature-mt_tRNA-His-GTG	2.51272	0.524502	0	0	0	1	2	0
AAAAAACATTAGACTG,mature-mt_tRNA-His-GTG	-2.15136	0.46453	1	0	4	1	0	0
AAAAAACATTAGACTGT,mature-mt_tRNA-His-GTG	0.195493	0.790297	15	18	22	16	17	24
AAAAAACATTAGACTGTG,mature-mt_tRNA-His-GTG	0.664576	0.307971	19	92	76	59	83	109
AAAAAACATTAGACTGTGA,mature-mt_tRNA-His-GTG	0.534562	0.489741	8	37	19	15	34	29
AAAAAACATTAGACTGTGAA,mature-mt_tRNA-His-GTG	1.98269	0.142952	0	2	4	9	7	6
AAAAAACATTAGACTGTGAAT,mature-mt_tRNA-His-GTG	1.97392	0.26136	2	0	1	8	2	3
AAAAAACATTAGACTGTGAATC,mature-mt_tRNA-His-GTG	0.47709	0.554108	14	11	13	37	9	11
AAAAAACATTAGACTGTGAATCT,mature-mt_tRNA-His-GTG	0.687731	0.535982	8	6	4	24	8	1
AAAAAACATTAGACTGTGAATCTG,mature-mt_tRNA-His-GTG	0.685828	0.516712	5	12	2	16	4	10
AAAAAACATTAGACTGTGAATCTGA,mature-mt_tRNA-His-GTG	-0.890784	0.475322	11	7	2	2	4	4
AAAAAACATTAGACTGTGAATCTGAC,mature-mt_tRNA-His-GTG	0.50151	0.433615	39	28	23	46	53	25
AAAAAACATTAGACTGTGAATCTGACA,mature-mt_tRNA-His-GTG	0.204704	0.744407	28	40	22	35	30	32
AAAAAACATTAGACTGTGAATCTGACAA,mature-mt_tRNA-His-GTG	0.488993	0.578983	5	28	7	12	18	18
AAAAAACATTAGACTGTGAATCTGACAAC,mature-mt_tRNA-His-GTG	0.199859	0.737023	25	43	38	41	37	35
AAAAAACATTAGACTGTGAATCTGACAACA,mature-mt_tRNA-His-GTG	-0.27324	0.82302	0	9	20	3	11	6
AAAAAACATTAGACTGTGAATCTGACAACAG,mature-mt_tRNA-His-GTG	-2.46372	0.215586	1	11	2	0	0	2
AAAAAACATTAGACTGTGAATCTGACAACAGG,mature-mt_tRNA-His-GTG	-0.441987	0.522011	20	37	28	36	10	17
AAAAAACATTAGACTGTGAATCTGACAACAGGA,mature-mt_tRNA-His-GTG	0.104947	0.873015	42	67	29	112	22	27
AAAAAACATTAGACTGTGAATCTGACAACAGGAA,mature-mt_tRNA-His-GTG	-0.607942	0.430599	40	30	48	74	10	7
AAAAAACATTAGACTGTGAATCTGACAACAGGAAA,mature-mt_tRNA-His-GTG	-1.61379	0.065364	25	27	28	25	2	3
AAAAAACATTAGACTGTGAATCTGACAACAGGAAAT,mature-mt_tRNA-His-GTG	-0.694893	0.349322	47	36	57	81	11	9
AAAAAACATTAGACTGTGAATCTGACAACAGGAAATA,mature-mt_tRNA-His-GTG	-0.871855	0.211976	49	50	102	95	13	16
AAAAAACATTAGACTGTGAATCTGACAACAGGAAATAA,mature-mt_tRNA-His-GTG	-2.1839	0.308695	0	4	8	3	0	0
AAAAAACATTAGACTGTGAATCTGACAACAGGAAATAAA,mature-mt_tRNA-His-GTG	-0.857035	0.718338	2	0	3	2	0	1
AAAAAACATTAGACTGTGAATCTGACAACAGGAAATAAAC,mature-mt_tRNA-His-GTG	0.645315	0.873754	1	0	0	2	0	0
AAAAAACATTAGACTGTGAATCTGACAACAGGAAATAAACC,mature-mt_tRNA-His-GTG	0.0726449	0.985796	0	1	0	0	0	1
AAAAAACATTAGACTGTGAATCTGACAACAGGAAATAAACCT,mature-mt_tRNA-His-GTG	-0.889136	0.827507	0	0	1	0	0	0
AAAAAATTAATGATTT,mature-mt_tRNA-Arg-TCG	-2.4072	0.5454	1	0	2	0	0	0
AAAAAATTAATGATTTCG,mature-mt_tRNA-Arg-TCG	-2.23023	0.577509	0	3	0	0	0	0
AAAAAATTAATGATTTCGACT,mature-mt_tRNA-Arg-TCG	-0.240995	0.907625	2	0	3	1	2	1
AAAAAATTAATGATTTCGACTC,mature-mt_tRNA-Arg-TCG	-1.12403	0.666023	3	0	2	3	0	0
AAAAAATTAATGATTTCGACTCA,mature-mt_tRNA-Arg-TCG	0.0601115	0.984901	0	1	1	1	1	0
AAAAAATTAATGATTTCGACTCAT,mature-mt_tRNA-Arg-TCG	-0.889136	0.827507	0	0	1	0	0	0
AAAAAATTAATGATTTCGACTCATT,mature-mt_tRNA-Arg-TCG	-0.418285	0.91051	2	0	0	2	0	0
AAAAAATTAATGATTTCGACTCATTAG,mature-mt_tRNA-Arg-TCG	1.60709	0.692322	0	0	0	2	0	0
AAAAAATTAATGATTTCGACTCATTAGA,mature-mt_tRNA-Arg-TCG	-1.81787	0.531749	1	1	2	1	0	0
AAAAAATTAATGATTTCGACTCATTAGATT,mature-mt_tRNA-Arg-TCG	-0.725306	0.772224	3	0	2	4	0	0
AAAAAATTAATGATTTCGACTCATTAGATTA,mature-mt_tRNA-Arg-TCG	-1.69942	0.674478	0	1	1	0	0	0
AAAAAATTAATGATTTCGACTCATTAGATTAT,mature-mt_tRNA-Arg-TCG	-0.889136	0.827507	1	0	0	0	0	0
AAAAAATTAATGATTTCGACTCATTAGATTATG,mature-mt_tRNA-Arg-TCG	0.445447	0.855183	2	0	1	4	1	0
AAAAAATTAATGATTTCGACTCATTAGATTATGA,mature-mt_tRNA-Arg-TCG	-0.889136	0.827507	1	0	0	0	0	0
AAAAAATTAATGATTTCGACTCATTAGATTATGAT,mature-mt_tRNA-Arg-TCG	0.0726449	0.985796	1	0	0	0	1	0
AAAAAATTAATGATTTCGACTCATTAGATTATGATGA,mature-mt_tRNA-Arg-TCG	1.03442	0.799879	0	0	0	1	0	0
AAAAAATTAATGATTTCGACTCATTAGATTATGATGATGT,mature-mt_tRNA-Arg-TCG	-0.889136	0.827507	1	0	0	0	0	0
AAAAACATGGCTTTCT,mature-mt_tRNA-Ser-GCT	1.94689	0.451923	2	0	0	11	0	0
AAAAACATGGCTTTCTT,mature-mt_tRNA-Ser-GCT	0.0309047	0.987416	1	0	6	6	2	0
AAAAACATGGCTTTCTTA,mature-mt_tRNA-Ser-GCT_3_end	1.50808	0.550134	2	0	0	5	2	0
AAAAACATGGCTTTCTTAC,mature-mt_tRNA-Ser-GCT	1.51307	0.281046	12	1	0	47	1	3
AAAAACATGGCTTTCTTACC,mature-mt_tRNA-Ser-GCT	1.53318	0.0208726	45	34	19	205	81	29
AAAAACATGGCTTTCTTACCA,mature-mt_tRNA-Ser-GCT_CCA_end	1.17322	0.0791862	50	23	23	145	68	26
AAAAACATTAGACTGT,mature-mt_tRNA-His-GTG	0.380065	0.650944	3	31	22	16	20	26
AAAAACATTAGACTGTG,mature-mt_tRNA-His-GTG	-0.0504202	0.940982	23	139	68	39	68	78
AAAAACATTAGACTGTGA,mature-mt_tRNA-His-GTG	0.433008	0.561966	9	60	29	23	52	36
AAAAACATTAGACTGTGAA,mature-mt_tRNA-His-GTG	0.644724	0.690433	2	3	1	4	1	4
AAAAACATTAGACTGTGAAT,mature-mt_tRNA-His-GTG	-1.22315	0.527799	4	1	3	0	1	2
AAAAACATTAGACTGTGAATC,mature-mt_tRNA-His-GTG	-0.170071	0.87072	16	1	13	14	6	8
AAAAACATTAGACTGTGAATCT,mature-mt_tRNA-His-GTG	0.431213	0.808247	2	2	1	4	2	1
AAAAACATTAGACTGTGAATCTG,mature-mt_tRNA-His-GTG	0.82152	0.545782	6	4	0	11	5	3
AAAAACATTAGACTGTGAATCTGA,mature-mt_tRNA-His-GTG	1.3717	0.285011	1	7	1	11	4	7
AAAAACATTAGACTGTGAATCTGAC,mature-mt_tRNA-His-GTG	0.660419	0.266667	30	45	22	60	40	46
AAAAACATTAGACTGTGAATCTGACA,mature-mt_tRNA-His-GTG	0.208999	0.775872	27	58	26	16	29	62
AAAAACATTAGACTGTGAATCTGACAA,mature-mt_tRNA-His-GTG	0.299765	0.680999	10	50	18	32	21	33
AAAAACATTAGACTGTGAATCTGACAAC,mature-mt_tRNA-His-GTG	-0.530803	0.424336	31	78	45	22	24	46
AAAAACATTAGACTGTGAATCTGACAACA,mature-mt_tRNA-His-GTG	-0.522415	0.620413	8	13	14	1	6	13
AAAAACATTAGACTGTGAATCTGACAACAG,mature-mt_tRNA-His-GTG	0.378913	0.85293	1	4	1	0	0	6
AAAAACATTAGACTGTGAATCTGACAACAGG,mature-mt_tRNA-His-GTG	-0.347011	0.613509	21	30	25	35	13	13
AAAAACATTAGACTGTGAATCTGACAACAGGA,mature-mt_tRNA-His-GTG	-0.220087	0.685837	74	74	56	98	41	41
AAAAACATTAGACTGTGAATCTGACAACAGGAA,mature-mt_tRNA-His-GTG	-1	0.126718	53	48	64	62	11	17
AAAAACATTAGACTGTGAATCTGACAACAGGAAA,mature-mt_tRNA-His-GTG	-1.37364	0.102817	59	36	49	52	1	12
AAAAACATTAGACTGTGAATCTGACAACAGGAAAT,mature-mt_tRNA-His-GTG	-0.362681	0.576998	55	45	76	110	23	20
AAAAACATTAGACTGTGAATCTGACAACAGGAAATA,mature-mt_tRNA-His-GTG	-1.26576	0.0264531	73	116	170	94	26	34
AAAAACATTAGACTGTGAATCTGACAACAGGAAATAA,mature-mt_tRNA-His-GTG	-1.6338	0.393972	0	6	6	3	1	0
AAAAACATTAGACTGTGAATCTGACAACAGGAAATAAA,mature-mt_tRNA-His-GTG	-0.871156	0.583646	2	5	6	7	0	1
AAAAACATTAGACTGTGAATCTGACAACAGGAAATAAAC,mature-mt_tRNA-His-GTG	1.35977	0.693047	0	0	1	2	1	0
AAAAACATTAGACTGTGAATCTGACAACAGGAAATAAACC,mature-mt_tRNA-His-GTG	-0.889136	0.827507	0	0	1	0	0	0
AAAAACATTAGACTGTGAATCTGACAACAGGAAATAAACCT,mature-mt_tRNA-His-GTG	-2.29666	0.565807	0	1	2	0	0	0
AAAAACATTAGACTGTGAATCTGACAACAGGAAATAAACCTCC,mature-mt_tRNA-His-GTG	-0.889136	0.827507	0	0	1	0	0	0
AAAAACCTTGGTGCAAA,mature-mt_tRNA-Leu-TAG	1.03442	0.799879	0	0	0	1	0	0
AAAAACCTTGGTGCAAAT,mature-mt_tRNA-Leu-TAG	-4.03859	0.122724	6	3	0	0	0	0
AAAAACCTTGGTGCAAATC,mature-mt_tRNA-Leu-TAG	-1.74683	0.519739	0	1	5	2	0	0
AAAAACCTTGGTGCAAATCC,mature-mt_tRNA-Leu-TAG	4.41096	0.000319623	1	0	2	19	29	12
AAAAACCTTGGTGCAAATCCA,mature-mt_tRNA-Leu-TAG	0.275868	0.927541	0	0	3	0	3	0
AAAAACCTTGGTGCAAATCCAA,mature-mt_tRNA-Leu-TAG	2.49607	0.532374	0	0	0	4	0	0
AAAAACCTTGGTGCAAATCCAAA,mature-mt_tRNA-Leu-TAG	-0.889136	0.827507	0	1	0	0	0	0
AAAAACCTTGGTGCAAATCCAAAT,mature-mt_tRNA-Leu-TAG	-1.48049	0.551945	1	5	0	1	0	1
AAAAACCTTGGTGCAAATCCAAATA,mature-mt_tRNA-Leu-TAG	-0.889136	0.827507	1	0	0	0	0	0
AAAAACCTTGGTGCAAATCCAAATAAA,mature-mt_tRNA-Leu-TAG	2.49607	0.532374	0	0	0	4	0	0
AAAAACCTTGGTGCAAATCCAAATAAAA,mature-mt_tRNA-Leu-TAG	-0.258149	0.930853	1	2	0	0	0	2
AAAAACCTTGGTGCAAATCCAAATAAAAG,mature-mt_tRNA-Leu-TAG	-0.116709	0.976281	0	2	0	2	0	0
AAAAACCTTGGTGCAAATCCAAATAAAAGT,mature-mt_tRNA-Leu-TAG	-1.96161	0.625864	2	0	0	0	0	0
AAAAACCTTGGTGCAAATCCAAATAAAAGTA,mature-mt_tRNA-Leu-TAG_3_end	0.339064	0.882148	6	0	0	11	0	0
AAAAACCTTGGTGCAAATCCAAATAAAAGTAC,mature-mt_tRNA-Leu-TAG	1.74939	0.578353	1	0	0	3	0	1
AAAAACCTTGGTGCAAATCCAAATAAAAGTACC,mature-mt_tRNA-Leu-TAG	-0.955898	0.493649	8	4	7	11	1	0
AAAAACCTTGGTGCAAATCCAAATAAAAGTACCA,mature-mt_tRNA-Leu-TAG_CCA_end	-0.872725	0.358017	14	17	24	30	3	2
AAAAATTAATGATTT,mature-mt_tRNA-Arg-TCG	-2.97151	0.428746	4	0	0	0	0	0
AAAAATTAATGATTTCG,mature-mt_tRNA-Arg-TCG	-2.32895	0.560157	0	0	3	0	0	0
AAAAATTAATGATTTCGA,mature-mt_tRNA-Arg-TCG	-1.96161	0.625864	2	0	0	0	0	0
AAAAATTAATGATTTCGACT,mature-mt_tRNA-Arg-TCG	1.33819	0.509612	4	0	0	8	0	4
AAAAATTAATGATTTCGACTC,mature-mt_tRNA-Arg-TCG	0.398115	0.835536	5	0	1	8	2	0
AAAAATTAATGATTTCGACTCA,mature-mt_tRNA-Arg-TCG	-1.0299	0.567608	3	2	4	4	1	0
AAAAATTAATGATTTCGACTCAT,mature-mt_tRNA-Arg-TCG	-2.32895	0.560157	0	0	3	0	0	0
AAAAATTAATGATTTCGACTCATT,mature-mt_tRNA-Arg-TCG	0.444805	0.819487	2	0	4	9	0	1
AAAAATTAATGATTTCGACTCATTAGA,mature-mt_tRNA-Arg-TCG	1.29493	0.59515	0	1	2	9	0	0
AAAAATTAATGATTTCGACTCATTAGATT,mature-mt_tRNA-Arg-TCG	1.59042	0.547063	0	0	2	6	1	0
AAAAATTAATGATTTCGACTCATTAGATTA,mature-mt_tRNA-Arg-TCG	-2.19632	0.446821	2	0	3	1	0	0
AAAAATTAATGATTTCGACTCATTAGATTATG,mature-mt_tRNA-Arg-TCG	0.812488	0.767932	1	1	0	3	1	0
AAAAATTAATGATTTCGACTCATTAGATTATGA,mature-mt_tRNA-Arg-TCG	-1.85677	0.645151	1	0	1	0	0	0
AAAAATTAATGATTTCGACTCATTAGATTATGAT,mature-mt_tRNA-Arg-TCG	-0.889136	0.827507	0	1	0	0	0	0
AAAAATTAATGATTTCGACTCATTAGATTATGATG,mature-mt_tRNA-Arg-TCG	-0.889136	0.827507	0	0	1	0	0	0
AAAAATTAATGATTTCGACTCATTAGATTATGATGAT,mature-mt_tRNA-Arg-TCG	-0.889136	0.827507	0	0	1	0	0	0
AAAAATTAATGATTTCGACTCATTAGATTATGATGATGTT,mature-mt_tRNA-Arg-TCG	1.03442	0.799879	0	0	0	1	0	0
AAAACACACAAGTTT,mature-mt_tRNA-Trp-TCA	0.654892	0.604449	3	7	2	2	8	6
AAAACACACAAGTTTA,mature-mt_tRNA-Trp-TCA	1.03442	0.799879	0	0	0	1	0	0
AAAACACACAAGTTTAAC,mature-mt_tRNA-Trp-TCA	-0.889136	0.827507	0	1	0	0	0	0
AAAACACACAAGTTTAACTT,mature-mt_tRNA-Trp-TCA	-0.889136	0.827507	1	0	0	0	0	0
AAAACACACAAGTTTAACTTCTG,mature-mt_tRNA-Trp-TCA_3_end	-1.01928	0.690855	5	0	0	2	1	0
AAAACACACAAGTTTAACTTCTGC,mature-mt_tRNA-Trp-TCA	1.42459	0.586383	15	0	1	59	0	3
AAAACACACAAGTTTAACTTCTGCC,mature-mt_tRNA-Trp-TCA	0.210076	0.83244	19	10	3	28	11	3
AAAACACACAAGTTTAACTTCTGCCA,mature-mt_tRNA-Trp-TCA_CCA_end	0.218269	0.688212	39	56	61	68	60	44
AAAACATGGCTTTCTTA,mature-mt_tRNA-Ser-GCT_3_end	2.49607	0.532374	0	0	0	4	0	0
AAAACATGGCTTTCTTAC,mature-mt_tRNA-Ser-GCT	0.865303	0.690878	4	0	0	4	0	4
AAAACATGGCTTTCTTACC,mature-mt_tRNA-Ser-GCT	0.672606	0.569145	12	1	4	23	2	7
AAAACATGGCTTTCTTACCA,mature-mt_tRNA-Ser-GCT_CCA_end	0.019643	0.985198	6	3	15	17	4	5
AAAACATTAGACTGT,mature-mt_tRNA-His-GTG	0.372495	0.894891	0	3	0	3	1	0
AAAACATTAGACTGTG,mature-mt_tRNA-His-GTG	0.968185	0.674741	1	0	2	6	0	1
AAAACATTAGACTGTGA,mature-mt_tRNA-His-GTG	0.259289	0.893795	6	0	0	1	3	3
AAAACATTAGACTGTGAA,mature-mt_tRNA-His-GTG	0.494945	0.868361	2	0	0	1	2	0
AAAACATTAGACTGTGAATC,mature-mt_tRNA-His-GTG	0.650447	0.594753	11	6	0	5	14	6
AAAACATTAGACTGTGAATCT,mature-mt_tRNA-His-GTG	0.679568	0.708909	3	0	3	8	0	3
AAAACATTAGACTGTGAATCTG,mature-mt_tRNA-His-GTG	1.10044	0.536574	1	0	5	10	0	4
AAAACATTAGACTGTGAATCTGA,mature-mt_tRNA-His-GTG	-0.853022	0.7882	1	0	2	2	0	0
AAAACATTAGACTGTGAATCTGAC,mature-mt_tRNA-His-GTG	0.0852989	0.965997	4	4	0	11	0	0
AAAACATTAGACTGTGAATCTGACA,mature-mt_tRNA-His-GTG	1.1285	0.480614	1	2	2	3	5	2
AAAACATTAGACTGTGAATCTGACAA,mature-mt_tRNA-His-GTG	1.61213	0.616819	1	0	0	1	0	2
AAAACATTAGACTGTGAATCTGACAAC,mature-mt_tRNA-His-GTG	-0.927245	0.577945	0	3	13	7	0	2
AAAACATTAGACTGTGAATCTGACAACA,mature-mt_tRNA-His-GTG	-1.31954	0.582181	1	1	3	1	1	0
AAAACATTAGACTGTGAATCTGACAACAG,mature-mt_tRNA-His-GTG	3.1659	0.0667004	1	1	0	3	8	5
AAAACATTAGACTGTGAATCTGACAACAGG,mature-mt_tRNA-His-GTG	-0.533878	0.468896	39	28	12	25	15	15
AAAACATTAGACTGTGAATCTGACAACAGGA,mature-mt_tRNA-His-GTG	-0.191168	0.729292	127	83	71	136	51	69
AAAACATTAGACTGTGAATCTGACAACAGGAA,mature-mt_tRNA-His-GTG	-0.143995	0.80762	107	68	59	140	36	53
AAAACATTAGACTGTGAATCTGACAACAGGAAA,mature-mt_tRNA-His-GTG	-0.835136	0.22475	123	91	99	126	9	56
AAAACATTAGACTGTGAATCTGACAACAGGAAAT,mature-mt_tRNA-His-GTG	-0.482025	0.432007	145	100	155	227	32	62
AAAACATTAGACTGTGAATCTGACAACAGGAAATA,mature-mt_tRNA-His-GTG	-0.651254	0.26042	121	92	91	137	31	43
AAAACATTAGACTGTGAATCTGACAACAGGAAATAA,mature-mt_tRNA-His-GTG	-0.733059	0.655904	4	3	3	3	0	3
AAAACATTAGACTGTGAATCTGACAACAGGAAATAAA,mature-mt_tRNA-His-GTG	-2.16171	0.212285	4	5	4	2	0	1
AAAACATTAGACTGTGAATCTGACAACAGGAAATAAAC,mature-mt_tRNA-His-GTG	-1.70702	0.240682	5	7	4	3	1	1
AAAACATTAGACTGTGAATCTGACAACAGGAAATAAACC,mature-mt_tRNA-His-GTG	-2.20456	0.311847	4	0	5	1	0	1
AAAACATTAGACTGTGAATCTGACAACAGGAAATAAACCT,mature-mt_tRNA-His-GTG	-3.24841	0.30853	4	0	1	0	0	0
AAAACATTAGACTGTGAATCTGACAACAGGAAATAAACCTC,mature-mt_tRNA-His-GTG	2.57903	0.505223	0	0	0	1	0	2
AAAACCTTGGTGCAAAT,mature-mt_tRNA-Leu-TAG	1.60709	0.692322	0	0	0	2	0	0
AAAACCTTGGTGCAAATC,mature-mt_tRNA-Leu-TAG	-2.03375	0.332329	4	1	3	1	0	1
AAAACCTTGGTGCAAATCC,mature-mt_tRNA-Leu-TAG	0.431088	0.805089	5	0	1	2	3	3
AAAACCTTGGTGCAAATCCA,mature-mt_tRNA-Leu-TAG	-0.209471	0.956756	0	0	2	2	0	0
AAAACCTTGGTGCAAATCCAAA,mature-mt_tRNA-Leu-TAG	1.60709	0.692322	0	0	0	2	0	0
AAAACCTTGGTGCAAATCCAAAT,mature-mt_tRNA-Leu-TAG	-0.889136	0.827507	0	0	1	0	0	0
AAAACCTTGGTGCAAATCCAAATA,mature-mt_tRNA-Leu-TAG	1.03442	0.799879	0	0	0	1	0	0
AAAACCTTGGTGCAAATCCAAATAA,mature-mt_tRNA-Leu-TAG	1.03442	0.799879	0	0	0	1	0	0
AAAACCTTGGTGCAAATCCAAATAAAA,mature-mt_tRNA-Leu-TAG	-0.889136	0.827507	1	0	0	0	0	0
AAAACCTTGGTGCAAATCCAAATAAAAG,mature-mt_tRNA-Leu-TAG	0.645315	0.873754	0	1	0	2	0	0
AAAACCTTGGTGCAAATCCAAATAAAAGT,mature-mt_tRNA-Leu-TAG	2.09257	0.603263	0	0	0	3	0	0
AAAACCTTGGTGCAAATCCAAATAAAAGTA,mature-mt_tRNA-Leu-TAG_3_end	1.48662	0.593816	2	0	0	8	0	0
AAAACCTTGGTGCAAATCCAAATAAAAGTAC,mature-mt_tRNA-Leu-TAG	-0.930501	0.693568	8	0	0	6	0	0
AAAACCTTGGTGCAAATCCAAATAAAAGTACC,mature-mt_tRNA-Leu-TAG	-0.58184	0.689871	7	4	10	18	0	0
AAAACCTTGGTGCAAATCCAAATAAAAGTACCA,mature-mt_tRNA-Leu-TAG_CCA_end	-0.966305	0.274507	15	12	39	27	3	7
AAAACCTTGTTCCCAGAG,mature-mt_tRNA-Leu-TAA	1.03442	0.799879	0	0	0	1	0	0
AAAACCTTGTTCCCAGAGGTTC,mature-mt_tRNA-Leu-TAA	2.09257	0.603263	0	0	0	3	0	0
AAAACCTTGTTCCCAGAGGTTCAAATCCT,mature-mt_tRNA-Leu-TAA	-0.889136	0.827507	0	1	0	0	0	0
AAAACCTTGTTCCCAGAGGTTCAAATCCTC,mature-mt_tRNA-Leu-TAA	-1.96161	0.625864	2	0	0	0	0	0
AAAACCTTGTTCCCAGAGGTTCAAATCCTCT,mature-mt_tRNA-Leu-TAA	-1.96161	0.625864	2	0	0	0	0	0
AAAACCTTGTTCCCAGAGGTTCAAATCCTCTC,mature-mt_tRNA-Leu-TAA	-0.816083	0.783166	1	1	1	2	0	0
AAAACCTTGTTCCCAGAGGTTCAAATCCTCTCC,mature-mt_tRNA-Leu-TAA	1.88453	0.641254	0	0	0	1	0	1
AAAACCTTGTTCCCAGAGGTTCAAATCCTCTCCCT,mature-mt_tRNA-Leu-TAA	1.03442	0.799879	0	0	0	1	0	0
AAAACCTTGTTCCCAGAGGTTCAAATCCTCTCCCTAATACC,mature-mt_tRNA-Leu-TAA	-0.889136	0.827507	0	1	0	0	0	0
AAAACCTTGTTCCCAGAGGTTCAAATCCTCTCCCTAATACCA,mature-mt_tRNA-Leu-TAA_CCA_end	1.03442	0.799879	0	0	0	0	1	0
AAAACGTTGGTTTAA,mature-mt_tRNA-Met-CAT	-0.889136	0.827507	1	0	0	0	0	0
AAAACGTTGGTTTAAAT,mature-mt_tRNA-Met-CAT	0.0726449	0.985796	1	0	0	0	0	1
AAAACGTTGGTTTAAATC,mature-mt_tRNA-Met-CAT	-0.889136	0.827507	0	0	1	0	0	0
AAAACGTTGGTTTAAATCCTT,mature-mt_tRNA-Met-CAT	1.21871	0.746427	1	0	0	0	0	2
AAAACGTTGGTTTAAATCCTTC,mature-mt_tRNA-Met-CAT	-1.96161	0.625864	2	0	0	0	0	0
AAAACGTTGGTTTAAATCCTTCCCG,mature-mt_tRNA-Met-CAT	1.54457	0.666081	1	0	0	4	0	0
AAAACGTTGGTTTAAATCCTTCCCGTA,mature-mt_tRNA-Met-CAT	1.60709	0.692322	0	0	0	2	0	0
AAAACGTTGGTTTAAATCCTTCCCGTACTAC,mature-mt_tRNA-Met-CAT	-0.889136	0.827507	1	0	0	0	0	0
AAAACGTTGGTTTAAATCCTTCCCGTACTACC,mature-mt_tRNA-Met-CAT	1.13601	0.773185	0	1	0	0	2	0
AAAACGTTGGTTTAAATCCTTCCCGTACTACCA,mature-mt_tRNA-Met-CAT_CCA_end	-1.24568	0.190916	20	9	14	10	7	2
AAAAGAATTACTTTG,mature-mt_tRNA-Ile-GAT	1.55792	0.344039	0	4	1	2	4	6
AAAAGAATTACTTTGA,mature-mt_tRNA-Ile-GAT	4.20847	0.021325	1	0	0	10	7	3
AAAAGAATTACTTTGAT,mature-mt_tRNA-Ile-GAT	2.9886	0.275931	0	1	0	11	0	0
AAAAGAATTACTTTGATA,mature-mt_tRNA-Ile-GAT	-0.0753177	0.976423	2	0	2	5	0	0
AAAAGAATTACTTTGATAG,mature-mt_tRNA-Ile-GAT	-1.36777	0.716888	0	0	3	1	0	0
AAAAGAATTACTTTGATAGA,mature-mt_tRNA-Ile-GAT	1.87926	0.242499	1	0	3	5	5	4
AAAAGAATTACTTTGATAGAG,mature-mt_tRNA-Ile-GAT	0.281485	0.851252	7	2	3	18	1	0
AAAAGAATTACTTTGATAGAGT,mature-mt_tRNA-Ile-GAT	0.985621	0.361037	14	1	3	23	9	8
AAAAGAATTACTTTGATAGAGTA,mature-mt_tRNA-Ile-GAT	0.963327	0.448021	5	1	7	27	2	2
AAAAGAATTACTTTGATAGAGTAA,mature-mt_tRNA-Ile-GAT	-2.96253	0.433114	0	5	0	0	0	0
AAAAGAATTACTTTGATAGAGTAAA,mature-mt_tRNA-Ile-GAT	0.166217	0.927047	2	6	0	5	4	0
AAAAGAATTACTTTGATAGAGTAAAT,mature-mt_tRNA-Ile-GAT	2.74452	0.291806	0	0	1	6	0	2
AAAAGAATTACTTTGATAGAGTAAATT,mature-mt_tRNA-Ile-GAT	1.39969	0.1438	5	6	5	29	10	6
AAAAGAATTACTTTGATAGAGTAAATTA,mature-mt_tRNA-Ile-GAT	0.722145	0.604273	7	2	1	16	1	3
AAAAGAATTACTTTGATAGAGTAAATTATA,mature-mt_tRNA-Ile-GAT	1.03442	0.799879	0	0	0	1	0	0
AAAAGAATTACTTTGATAGAGTAAATTATAGA,mature-mt_tRNA-Ile-GAT	1.60709	0.692322	0	0	0	2	0	0
AAAAGAATTACTTTGATAGAGTAAATTATAGAG,mature-mt_tRNA-Ile-GAT	-0.214001	0.943033	0	1	2	0	0	2
AAAAGAATTACTTTGATAGAGTAAATTATAGAGG,mature-mt_tRNA-Ile-GAT	-0.75964	0.54308	5	6	11	13	1	1
AAAAGAATTACTTTGATAGAGTAAATTATAGAGGT,mature-mt_tRNA-Ile-GAT	-3.53092	0.192905	1	4	2	0	0	0
AAAAGAATTACTTTGATAGAGTAAATTATAGAGGTT,mature-mt_tRNA-Ile-GAT	-0.847212	0.541601	10	3	7	13	1	0
AAAAGAATTACTTTGATAGAGTAAATTATAGAGGTTC,mature-mt_tRNA-Ile-GAT	-0.592495	0.665991	3	4	10	8	4	0
AAAAGAATTACTTTGATAGAGTAAATTATAGAGGTTCA,mature-mt_tRNA-Ile-GAT	0.0726449	0.985796	0	0	1	1	0	0
AAAAGAATTACTTTGATAGAGTAAATTATAGAGGTTCAA,mature-mt_tRNA-Ile-GAT	-0.889136	0.827507	0	0	1	0	0	0
AAAAGAATTACTTTGATAGAGTAAATTATAGAGGTTCAAG,mature-mt_tRNA-Ile-GAT	1.03442	0.799879	0	0	0	0	0	1
AAAATCAATTACATAACT,mature-mt_tRNA-Asp-GTC	2.09257	0.603263	0	0	0	3	0	0
AAAATCAATTACATAACTTTG,mature-mt_tRNA-Asp-GTC	-0.692067	0.846269	0	3	0	2	0	0
AAAATCAATTACATAACTTTGT,mature-mt_tRNA-Asp-GTC	-0.273132	0.883419	1	4	2	4	2	0
AAAATCAATTACATAACTTTGTC,mature-mt_tRNA-Asp-GTC	1.59945	0.167385	16	0	2	41	20	4
AAAATCAATTACATAACTTTGTCA,mature-mt_tRNA-Asp-GTC	1.02582	0.401586	1	7	5	23	4	2
AAAATCAATTACATAACTTTGTCAA,mature-mt_tRNA-Asp-GTC	1.53728	0.334293	1	4	1	15	0	4
AAAATCAATTACATAACTTTGTCAAA,mature-mt_tRNA-Asp-GTC	1.44424	0.55451	1	0	1	4	0	2
AAAATCAATTACATAACTTTGTCAAAG,mature-mt_tRNA-Asp-GTC	2.55053	0.11371	1	2	0	8	3	6
AAAATCAATTACATAACTTTGTCAAAGT,mature-mt_tRNA-Asp-GTC	0.315394	0.723955	15	4	12	20	10	10
AAAATCAATTACATAACTTTGTCAAAGTT,mature-mt_tRNA-Asp-GTC	0.33812	0.745556	5	6	10	21	4	4
AAAATCAATTACATAACTTTGTCAAAGTTA,mature-mt_tRNA-Asp-GTC	-0.271997	0.863814	2	6	1	3	2	2
AAAATCAATTACATAACTTTGTCAAAGTTAA,mature-mt_tRNA-Asp-GTC	1.64366	0.444988	1	1	1	12	0	0
AAAATCAATTACATAACTTTGTCAAAGTTAAA,mature-mt_tRNA-Asp-GTC	-1.33756	0.700348	0	1	2	1	0	0
AAAATCAATTACATAACTTTGTCAAAGTTAAAT,mature-mt_tRNA-Asp-GTC	-2.35146	0.222894	0	2	13	2	1	0
AAAATCAATTACATAACTTTGTCAAAGTTAAATT,mature-mt_tRNA-Asp-GTC	0.154527	0.90278	3	7	4	13	2	2
AAAATCAATTACATAACTTTGTCAAAGTTAAATTA,mature-mt_tRNA-Asp-GTC	-2.97151	0.428746	4	0	0	0	0	0
AAAATCAATTACATAACTTTGTCAAAGTTAAATTAT,mature-mt_tRNA-Asp-GTC	2.49607	0.532374	0	0	0	4	0	0
AAAATCAATTACATAACTTTGTCAAAGTTAAATTATA,mature-mt_tRNA-Asp-GTC	-1.96161	0.625864	2	0	0	0	0	0
AAAATCAATTACATAACTTTGTCAAAGTTAAATTATAG,mature-mt_tRNA-Asp-GTC	-0.893573	0.814317	1	0	1	1	0	0
AAAATCAATTACATAACTTTGTCAAAGTTAAATTATAGA,mature-mt_tRNA-Asp-GTC	-0.456084	0.843224	5	1	0	6	0	0
AAAATCAATTACATAACTTTGTCAAAGTTAAATTATAGAT,mature-mt_tRNA-Asp-GTC	-2.83643	0.381781	2	1	1	0	0	0
AAAATCAATTACATAACTTTGTCAAAGTTAAATTATAGATC,mature-mt_tRNA-Asp-GTC	0.0726449	0.985796	0	1	0	1	0	0
AAAATCAATTACATAACTTTGTCAAAGTTAAATTATAGATCA,mature-mt_tRNA-Asp-GTC	0.0726449	0.985796	0	1	0	1	0	0
AAAATCAATTACATAACTTTGTCAAAGTTAAATTATAGATCAAT,mature-mt_tRNA-Asp-GTC	0.0726449	0.985796	0	0	1	1	0	0
AAAATCTCCATAGTGA,mature-mt_tRNA-Lys-TTT_3_end	2.09257	0.603263	0	0	0	3	0	0
AAAATCTCCATAGTGAC,mature-mt_tRNA-Lys-TTT	0.642491	0.796512	4	0	0	9	0	0
AAAATCTCCATAGTGACC,mature-mt_tRNA-Lys-TTT	0.575538	0.865036	13	0	2	33	0	0
AAAATCTCCATAGTGACCA,mature-mt_tRNA-Lys-TTT_CCA_end	0.91759	0.135774	119	40	72	314	89	87
AAAATGGCTGAGTAAGCATTA,mature-mt_tRNA-Tyr-GTA	3.27365	0.306367	0	0	0	2	0	3
AAAATTAATGATTTCGA,mature-mt_tRNA-Arg-TCG	1.60709	0.692322	0	0	0	2	0	0
AAAATTAATGATTTCGACT,mature-mt_tRNA-Arg-TCG	1.21477	0.545846	3	1	0	11	0	1
AAAATTAATGATTTCGACTC,mature-mt_tRNA-Arg-TCG	3.3935	0.149707	1	0	0	13	1	0
AAAATTAATGATTTCGACTCA,mature-mt_tRNA-Arg-TCG	1.43783	0.269651	3	2	2	12	3	5
AAAATTAATGATTTCGACTCATT,mature-mt_tRNA-Arg-TCG	2.61913	0.114309	1	0	2	16	1	4
AAAATTAATGATTTCGACTCATTA,mature-mt_tRNA-Arg-TCG	1.13517	0.769057	1	0	0	3	0	0
AAAATTAATGATTTCGACTCATTAGA,mature-mt_tRNA-Arg-TCG	0.267222	0.841701	5	1	5	8	2	4
AAAATTAATGATTTCGACTCATTAGAT,mature-mt_tRNA-Arg-TCG	-0.889136	0.827507	1	0	0	0	0	0
AAAATTAATGATTTCGACTCATTAGATT,mature-mt_tRNA-Arg-TCG	-4.1272	0.0818401	3	1	6	0	0	0
AAAATTAATGATTTCGACTCATTAGATTA,mature-mt_tRNA-Arg-TCG	-1.52204	0.559411	1	1	3	2	0	0
AAAATTAATGATTTCGACTCATTAGATTATG,mature-mt_tRNA-Arg-TCG	-2.61446	0.176379	4	1	7	1	1	0
AAAATTAATGATTTCGACTCATTAGATTATGA,mature-mt_tRNA-Arg-TCG	0.157116	0.950577	2	0	1	3	1	0
AAAATTAATGATTTCGACTCATTAGATTATGAT,mature-mt_tRNA-Arg-TCG	0.645315	0.873754	0	0	1	2	0	0
AAAATTAATGATTTCGACTCATTAGATTATGATG,mature-mt_tRNA-Arg-TCG	-2.3223	0.255032	2	1	7	1	1	0
AAAATTAATGATTTCGACTCATTAGATTATGATGA,mature-mt_tRNA-Arg-TCG	-3.31203	0.292548	0	1	5	0	0	0
AAAATTAATGATTTCGACTCATTAGATTATGATGAT,mature-mt_tRNA-Arg-TCG	0.0726449	0.985796	0	0	1	0	0	1
AAAATTAATGATTTCGACTCATTAGATTATGATGATGT,mature-mt_tRNA-Arg-TCG	-0.889136	0.827507	0	1	0	0	0	0
AAACACACAAGTTTA,mature-mt_tRNA-Trp-TCA	1.03442	0.799879	0	0	0	1	0	0
AAACACACAAGTTTAACTT,mature-mt_tRNA-Trp-TCA	-2.34488	0.55738	1	2	0	0	0	0
AAACACACAAGTTTAACTTC,mature-mt_tRNA-Trp-TCA	1.03442	0.799879	0	0	0	0	1	0
AAACACACAAGTTTAACTTCTG,mature-mt_tRNA-Trp-TCA_3_end	2.00978	0.502033	1	0	0	1	3	0
AAACACACAAGTTTAACTTCTGC,mature-mt_tRNA-Trp-TCA	0.664164	0.504131	39	11	5	100	10	4
AAACACACAAGTTTAACTTCTGCC,mature-mt_tRNA-Trp-TCA	1.98015	0.0289589	17	6	3	98	16	11
AAACACACAAGTTTAACTTCTGCCA,mature-mt_tRNA-Trp-TCA_CCA_end	0.391029	0.404127	120	138	115	219	149	113
AAACACAGAGGTTTAAATCCTCTTTTT,mature-mt_tRNA-Tyr-GTA	-0.889136	0.827507	0	0	1	0	0	0
AAACACAGAGGTTTAAATCCTCTTTTTACCA,mature-mt_tRNA-Tyr-GTA_3_end	2.49607	0.532374	0	0	0	4	0	0
AAACACAGAGGTTTAAATCCTCTTTTTACCAC,mature-mt_tRNA-Tyr-GTA	1.03442	0.799879	0	0	0	1	0	0
AAACACAGAGGTTTAAATCCTCTTTTTACCACC,mature-mt_tRNA-Tyr-GTA	-1.87248	0.364554	4	2	3	3	0	0
AAACACAGAGGTTTAAATCCTCTTTTTACCACCA,mature-mt_tRNA-Tyr-GTA_CCA_end	-0.808576	0.618338	2	2	6	4	1	1
AAACAGGAGATCCTGGGTTC,mature-tRNA-Thr-TGT;mature-tRNA-Thr-CGT;mature-tRNA-Thr-AGT	1.60709	0.692322	0	0	0	2	0	0
AAACAGGAGATCCTGGGTTCAAATCCCAGCGGGG,mature-tRNA-Thr-AGT	-3.24488	0.310545	0	5	1	0	0	0
AAACAGGAGATCCTGGGTTCG,mature-tRNA-Thr-TGT;mature-tRNA-Thr-CGT;mature-tRNA-Thr-AGT	3.70509	0.203637	0	0	0	0	5	1
AAACAGGAGATCCTGGGTTCGA,mature-tRNA-Thr-TGT;mature-tRNA-Thr-CGT;mature-tRNA-Thr-AGT	1.03442	0.799879	0	0	0	0	0	1
AAACAGGAGATCCTGGGTTCGAATCC,mature-tRNA-Thr-TGT;mature-tRNA-Thr-CGT;mature-tRNA-Thr-AGT	-0.889136	0.827507	0	1	0	0	0	0
AAACAGGAGATCCTGGGTTCGAATCCCAGCGGGG,mature-tRNA-Thr-AGT	1.03442	0.799879	0	0	0	1	0	0
AAACAGGAGATCCTGGGTTCGAATCCCAGCGGTGCC,mature-tRNA-Thr-AGT	1.60709	0.692322	0	0	0	2	0	0
AAACAGGAGATCCTGGGTTCGAATCCCAGCGGTGCCTCCA,mature-tRNA-Thr-AGT_CCA_end	-0.889136	0.827507	0	0	1	0	0	0
AAACATGGCTTTCTT,mature-mt_tRNA-Ser-GCT	-3.48258	0.243455	4	0	2	0	0	0
AAACATGGCTTTCTTA,mature-mt_tRNA-Ser-GCT_3_end	-0.999826	0.803743	2	0	0	1	0	0
AAACATGGCTTTCTTAC,mature-mt_tRNA-Ser-GCT	0.222694	0.93886	3	0	0	5	0	0
AAACATGGCTTTCTTACC,mature-mt_tRNA-Ser-GCT	0.529011	0.632522	17	3	3	29	9	2
AAACATGGCTTTCTTACCA,mature-mt_tRNA-Ser-GCT_CCA_end	-0.431947	0.682342	13	8	11	23	4	1
AAACATTACTCTGGT,mature-mt_tRNA-Thr-TGT	-2.5541	0.521517	3	0	0	0	0	0
AAACATTACTCTGGTCT,mature-mt_tRNA-Thr-TGT	-0.787129	0.822421	0	0	3	2	0	0
AAACATTACTCTGGTCTT,mature-mt_tRNA-Thr-TGT	0.280616	0.912205	0	0	5	0	5	0
AAACATTACTCTGGTCTTG,mature-mt_tRNA-Thr-TGT	2.78009	0.485032	0	0	0	0	0	3
AAACATTACTCTGGTCTTGT,mature-mt_tRNA-Thr-TGT	-1.29684	0.65641	2	0	2	2	0	0
AAACATTACTCTGGTCTTGTA,mature-mt_tRNA-Thr-TGT	3.69246	0.247607	0	0	0	0	6	0
AAACATTACTCTGGTCTTGTAA,mature-mt_tRNA-Thr-TGT	1.13517	0.769057	1	0	0	3	0	0
AAACATTACTCTGGTCTTGTAAA,mature-mt_tRNA-Thr-TGT	-0.233323	0.889816	2	5	2	2	5	0
AAACATTACTCTGGTCTTGTAAAC,mature-mt_tRNA-Thr-TGT	1.32571	0.444309	0	1	5	8	7	0
AAACATTACTCTGGTCTTGTAAACC,mature-mt_tRNA-Thr-TGT	1.24348	0.458088	0	2	5	0	6	7
AAACATTACTCTGGTCTTGTAAACCT,mature-mt_tRNA-Thr-TGT	2.81066	0.480072	0	0	0	5	0	0
AAACATTACTCTGGTCTTGTAAACCTG,mature-mt_tRNA-Thr-TGT	4.23257	0.0670591	0	0	0	4	4	2
AAACATTACTCTGGTCTTGTAAACCTGA,mature-mt_tRNA-Thr-TGT	-0.00148107	0.998919	1	12	13	11	3	10
AAACATTACTCTGGTCTTGTAAACCTGAA,mature-mt_tRNA-Thr-TGT	-0.0604072	0.977122	0	2	4	1	4	0
AAACATTACTCTGGTCTTGTAAACCTGAAA,mature-mt_tRNA-Thr-TGT	1.1496	0.447651	1	2	3	6	6	1
AAACATTACTCTGGTCTTGTAAACCTGAAAT,mature-mt_tRNA-Thr-TGT	0.0471223	0.970472	2	10	4	5	9	1
AAACATTACTCTGGTCTTGTAAACCTGAAATG,mature-mt_tRNA-Thr-TGT	1.17335	0.743837	0	1	0	0	1	1
AAACATTACTCTGGTCTTGTAAACCTGAAATGAAGA,mature-mt_tRNA-Thr-TGT	-0.315014	0.90153	0	4	1	0	0	3
AAACATTACTCTGGTCTTGTAAACCTGAAATGAAGAT,mature-mt_tRNA-Thr-TGT	-1.06479	0.601841	1	3	3	1	0	2
AAACATTACTCTGGTCTTGTAAACCTGAAATGAAGATC,mature-mt_tRNA-Thr-TGT	1.03442	0.799879	0	0	0	1	0	0
AAACATTACTCTGGTCTTGTAAACCTGAAATGAAGATCT,mature-mt_tRNA-Thr-TGT	0.922601	0.805406	0	0	1	1	0	1
AAACATTACTCTGGTCTTGTAAACCTGAAATGAAGATCTT,mature-mt_tRNA-Thr-TGT	-1.19433	0.445563	4	3	7	6	0	1
AAACATTACTCTGGTCTTGTAAACCTGAAATGAAGATCTTC,mature-mt_tRNA-Thr-TGT	1.33606	0.511969	0	1	2	3	1	3
AAACATTACTCTGGTCTTGTAAACCTGAAATGAAGATCTTCT,mature-mt_tRNA-Thr-TGT	-2.63865	0.258983	1	0	10	2	0	0
AAACATTACTCTGGTCTTGTAAACCTGAAATGAAGATCTTCTC,mature-mt_tRNA-Thr-TGT	-0.889136	0.827507	1	0	0	0	0	0
AAACATTAGACTGTG,mature-mt_tRNA-His-GTG	0.483801	0.813015	0	7	0	5	0	4
AAACATTAGACTGTGA,mature-mt_tRNA-His-GTG	-1.40095	0.534288	6	2	0	4	0	0
AAACATTAGACTGTGAA,mature-mt_tRNA-His-GTG	-1.0596	0.660432	0	1	6	4	0	0
AAACATTAGACTGTGAAT,mature-mt_tRNA-His-GTG	-2.8154	0.315672	7	0	0	1	0	0
AAACATTAGACTGTGAATC,mature-mt_tRNA-His-GTG	-0.901612	0.455344	8	6	5	4	4	2
AAACATTAGACTGTGAATCT,mature-mt_tRNA-His-GTG	-0.524894	0.487057	19	20	18	21	9	10
AAACATTAGACTGTGAATCTG,mature-mt_tRNA-His-GTG	-1.00189	0.387438	16	11	2	8	1	6
AAACATTAGACTGTGAATCTGA,mature-mt_tRNA-His-GTG	0.487864	0.752099	1	2	4	3	3	3
AAACATTAGACTGTGAATCTGAC,mature-mt_tRNA-His-GTG	0.75923	0.455782	12	3	4	12	7	13
AAACATTAGACTGTGAATCTGACA,mature-mt_tRNA-His-GTG	-0.471979	0.646686	13	10	6	16	2	5
AAACATTAGACTGTGAATCTGACAA,mature-mt_tRNA-His-GTG	-0.00999407	0.996192	1	0	5	6	1	0
AAACATTAGACTGTGAATCTGACAAC,mature-mt_tRNA-His-GTG	-0.0644781	0.956965	10	5	2	9	2	6
AAACATTAGACTGTGAATCTGACAACA,mature-mt_tRNA-His-GTG	0.297545	0.812586	4	8	5	17	6	0
AAACATTAGACTGTGAATCTGACAACAG,mature-mt_tRNA-His-GTG	1.51747	0.445058	1	1	1	3	0	5
AAACATTAGACTGTGAATCTGACAACAGG,mature-mt_tRNA-His-GTG	-0.196981	0.754655	41	59	27	69	21	25
AAACATTAGACTGTGAATCTGACAACAGGA,mature-mt_tRNA-His-GTG	0.0698936	0.891831	167	122	140	274	90	111
AAACATTAGACTGTGAATCTGACAACAGGAA,mature-mt_tRNA-His-GTG	-0.184813	0.715908	206	175	146	284	96	109
AAACATTAGACTGTGAATCTGACAACAGGAAA,mature-mt_tRNA-His-GTG	-0.583389	0.264492	254	199	181	275	78	100
AAACATTAGACTGTGAATCTGACAACAGGAAAT,mature-mt_tRNA-His-GTG	-0.427693	0.431332	405	254	282	491	114	163
AAACATTAGACTGTGAATCTGACAACAGGAAATA,mature-mt_tRNA-His-GTG	-0.530205	0.351899	320	167	268	381	80	119
AAACATTAGACTGTGAATCTGACAACAGGAAATAA,mature-mt_tRNA-His-GTG	-0.812415	0.439046	6	7	14	7	4	4
AAACATTAGACTGTGAATCTGACAACAGGAAATAAA,mature-mt_tRNA-His-GTG	-1.24035	0.299701	5	4	19	4	1	6
AAACATTAGACTGTGAATCTGACAACAGGAAATAAAC,mature-mt_tRNA-His-GTG	-3.04627	0.0160337	12	7	19	4	0	1
AAACATTAGACTGTGAATCTGACAACAGGAAATAAACC,mature-mt_tRNA-His-GTG	-2.92501	0.240819	5	0	3	1	0	0
AAACATTAGACTGTGAATCTGACAACAGGAAATAAACCT,mature-mt_tRNA-His-GTG	-1.37922	0.301484	10	2	7	5	2	1
AAACATTAGACTGTGAATCTGACAACAGGAAATAAACCTC,mature-mt_tRNA-His-GTG	-1.56383	0.542519	2	1	2	2	0	0
AAACATTAGACTGTGAATCTGACAACAGGAAATAAACCTCC,mature-mt_tRNA-His-GTG	1.13517	0.769057	1	0	0	3	0	0
AAACATTAGACTGTGAATCTGACAACAGGAAATAAACCTCCT,mature-mt_tRNA-His-GTG	0.645315	0.873754	1	0	0	2	0	0
AAACATTAGACTGTGAATCTGACAACAGGAAATAAACCTCCTT,mature-mt_tRNA-His-GTG	2.81066	0.480072	0	0	0	5	0	0
AAACCAGGGGTCGCGAG,mature-tRNA-Thr-TGT	-0.889136	0.827507	0	0	1	0	0	0
AAACCAGGGGTCGCGAGT,mature-tRNA-Thr-TGT	-1.6517	0.683455	0	2	0	0	0	0
AAACCAGGGGTCGCGAGTT,mature-tRNA-Thr-TGT	1.0723	0.718903	2	0	0	6	0	0
AAACCAGGGGTCGCGAGTTC,mature-tRNA-Thr-TGT	-2.5541	0.521517	3	0	0	0	0	0
AAACCAGGGGTCGCGAGTTCAAATC,mature-tRNA-Thr-TGT	-1.746	0.665753	0	0	2	0	0	0
AAACCAGGGGTCGCGAGTTCAAATCTC,mature-tRNA-Thr-TGT	-0.889136	0.827507	0	0	1	0	0	0
AAACCAGGGGTCGCGAGTTCAAATCTCGCTGGGG,mature-tRNA-Thr-TGT	3.07206	0.41318	0	0	0	6	0	0
AAACCATCCTCTGCTACC,mature-tRNA-iMet-CAT	-0.709144	0.637625	0	9	7	1	4	3
AAACCATCCTCTGCTACCA,mature-tRNA-iMet-CAT_CCA_end	-0.233335	0.853165	2	17	8	0	12	6
AAACCCAGAAGAGAG,mature-mt_tRNA-Gly-TCC	-0.716479	0.701759	3	5	0	3	1	1
AAACCCAGAAGAGAGT,mature-mt_tRNA-Gly-TCC	-0.47216	0.83783	2	3	0	3	1	0
AAACCCAGAAGAGAGTA,mature-mt_tRNA-Gly-TCC_3_end	1.1139	0.743109	10	0	0	31	1	0
AAACCCAGAAGAGAGTAC,mature-mt_tRNA-Gly-TCC	0.385636	0.734243	7	5	3	13	4	4
AAACCCAGAAGAGAGTACC,mature-mt_tRNA-Gly-TCC	0.357359	0.626783	129	55	27	205	85	22
AAACCCAGAAGAGAGTACCA,mature-mt_tRNA-Gly-TCC_CCA_end	0.604738	0.196596	289	228	270	500	421	258
AAACCGAAGATCACGGGTTCGAACC,mature-tRNA-Thr-CGT	1.03442	0.799879	0	0	0	0	1	0
AAACCGAAGATCACGGGTTCGAACCCCGTC,mature-tRNA-Thr-CGT	2.09872	0.602152	0	0	0	0	2	0
AAACCGAAGATCACGGGTTCGAACCCCGTCCGTG,mature-tRNA-Thr-CGT	1.60709	0.692322	0	0	0	2	0	0
AAACCGAAGATCGCGGGTTCGAACCCCGTCCGTG,mature-tRNA-Thr-CGT	1.03442	0.799879	0	0	0	1	0	0
AAACCGGGCGGAAAC,mature-tRNA-Val-CAC;mature-tRNA-Val-AAC;mature-tRNA-Gly-ACC	-2.69448	0.462649	0	2	2	0	0	0
AAACCGGGCGGAAACA,mature-tRNA-Val-CAC_3_end;mature-tRNA-Val-AAC_3_end;mature-tRNA-Gly-ACC_3_end	2.4946	0.361544	0	0	1	0	3	2
AAACCGGGCGGAAACAC,mature-tRNA-Val-CAC;mature-tRNA-Val-AAC;mature-tRNA-Gly-ACC	-4.4129	0.0670529	0	4	9	0	0	0
AAACCGGGCGGAAACACC,mature-tRNA-Val-CAC;mature-tRNA-Val-AAC;mature-tRNA-Gly-ACC	-2.39729	0.0380338	4	27	13	1	2	4
AAACCGGGCGGAAACACCA,mature-tRNA-Val-CAC_CCA_end;mature-tRNA-Val-AAC_CCA_end;mature-tRNA-Gly-ACC_CCA_end	-0.305253	0.829629	0	11	13	0	7	8
AAACCGGGCGGGAACACC,mature-tRNA-Val-CAC;mature-tRNA-Val-AAC	-0.889136	0.827507	0	1	0	0	0	0
AAACCTCCTTATTCA,mature-mt_tRNA-His-GTG	-1.6517	0.683455	0	2	0	0	0	0
AAACCTCCTTATTCAC,mature-mt_tRNA-His-GTG	1.03442	0.799879	0	0	0	1	0	0
AAACCTCCTTATTCACC,mature-mt_tRNA-His-GTG_3_end	-0.0121461	0.993612	12	4	0	17	0	3
AAACCTCCTTATTCACCC,mature-mt_tRNA-His-GTG	-0.317637	0.743369	38	9	3	29	7	10
AAACCTCCTTATTCACCCC,mature-mt_tRNA-His-GTG	0.559747	0.280644	127	108	66	218	131	101
AAACCTCCTTATTCACCCCA,mature-mt_tRNA-His-GTG_CCA_end	0.0917865	0.836216	219	270	278	324	252	208
AAACCTCCTTGTTCACCCC,mature-mt_tRNA-His-GTG	1.03442	0.799879	0	0	0	1	0	0
AAACCTGAAATGAAG,mature-mt_tRNA-Thr-TGT	-1.6517	0.683455	0	2	0	0	0	0
AAACCTGAAATGAAGA,mature-mt_tRNA-Thr-TGT	2.74716	0.457093	0	0	0	0	1	2
AAACCTGAAATGAAGAT,mature-mt_tRNA-Thr-TGT	-1.39035	0.58093	3	2	0	1	1	0
AAACCTGAAATGAAGATCT,mature-mt_tRNA-Thr-TGT	-0.692067	0.846269	0	3	0	2	0	0
AAACCTGAAATGAAGATCTT,mature-mt_tRNA-Thr-TGT	1.24145	0.395628	2	2	4	18	4	0
AAACCTGAAATGAAGATCTTC,mature-mt_tRNA-Thr-TGT	1.4759	0.299518	1	1	4	4	5	6
AAACCTGAAATGAAGATCTTCT,mature-mt_tRNA-Thr-TGT	-0.562799	0.708561	10	1	3	4	6	0
AAACCTGAAATGAAGATCTTCTC,mature-mt_tRNA-Thr-TGT	1.1841	0.526405	1	1	2	4	5	0
AAACCTGAAATGAAGATCTTCTCT,mature-mt_tRNA-Thr-TGT	2.69004	0.499796	0	0	0	0	3	0
AAACCTGAAATGAAGATCTTCTCTT,mature-mt_tRNA-Thr-TGT	0.896452	0.534223	3	1	3	3	3	6
AAACCTGAAATGAAGATCTTCTCTTCT,mature-mt_tRNA-Thr-TGT	1.08315	0.714819	2	0	0	0	4	0
AAACCTGAAATGAAGATCTTCTCTTCTC,mature-mt_tRNA-Thr-TGT	3.35102	0.285947	0	0	0	4	0	2
AAACCTGAAATGAAGATCTTCTCTTCTCAA,mature-mt_tRNA-Thr-TGT	3.19653	0.37532	0	0	0	0	0	4
AAACCTGAAATGAAGATCTTCTCTTCTCAAG,mature-mt_tRNA-Thr-TGT	0.50913	0.756992	7	2	0	8	0	6
AAACCTGAAATGAAGATCTTCTCTTCTCAAGA,mature-mt_tRNA-Thr-TGT	-2.4029	0.255457	10	0	2	3	0	0
AAACCTGAAATGAAGATCTTCTCTTCTCAAGAC,mature-mt_tRNA-Thr-TGT	-1.34956	0.642467	3	0	1	2	0	0
AAACCTGAAATGAAGATCTTCTCTTCTCAAGACA,mature-mt_tRNA-Thr-TGT_3_end	-0.178811	0.957264	14	0	0	17	1	0
AAACCTGAAATGAAGATCTTCTCTTCTCAAGACAC,mature-mt_tRNA-Thr-TGT	-0.905273	0.599426	7	2	1	4	0	2
AAACCTGAAATGAAGATCTTCTCTTCTCAAGACACC,mature-mt_tRNA-Thr-TGT	0.483316	0.7346	4	1	8	19	3	0
AAACCTGAAATGAAGATCTTCTCTTCTCAAGACACCA,mature-mt_tRNA-Thr-TGT_CCA_end	-0.226494	0.781502	36	23	44	90	7	9
AAACCTGTAGCTGTTTAGCGAC,mature-tRNA-SeC-TCA	3.42901	0.313839	0	0	0	0	5	0
AAACCTTGGTGCAAAT,mature-mt_tRNA-Leu-TAG	-0.889136	0.827507	1	0	0	0	0	0
AAACCTTGGTGCAAATC,mature-mt_tRNA-Leu-TAG	-0.506403	0.859147	4	0	0	4	0	0
AAACCTTGGTGCAAATCC,mature-mt_tRNA-Leu-TAG	-0.868015	0.722889	2	4	0	4	0	0
AAACCTTGGTGCAAATCCA,mature-mt_tRNA-Leu-TAG	1.60709	0.692322	0	0	0	2	0	0
AAACCTTGGTGCAAATCCAAA,mature-mt_tRNA-Leu-TAG	1.03442	0.799879	0	0	0	0	0	1
AAACCTTGGTGCAAATCCAAAT,mature-mt_tRNA-Leu-TAG	-2.5541	0.521517	3	0	0	0	0	0
AAACCTTGGTGCAAATCCAAATA,mature-mt_tRNA-Leu-TAG	-0.889136	0.827507	1	0	0	0	0	0
AAACCTTGGTGCAAATCCAAATAAAA,mature-mt_tRNA-Leu-TAG	-0.889136	0.827507	1	0	0	0	0	0
AAACCTTGGTGCAAATCCAAATAAAAG,mature-mt_tRNA-Leu-TAG	-0.889136	0.827507	1	0	0	0	0	0
AAACCTTGGTGCAAATCCAAATAAAAGT,mature-mt_tRNA-Leu-TAG	1.03442	0.799879	0	0	0	1	0	0
AAACCTTGGTGCAAATCCAAATAAAAGTA,mature-mt_tRNA-Leu-TAG_3_end	-0.522843	0.825922	7	0	0	7	0	0
AAACCTTGGTGCAAATCCAAATAAAAGTAC,mature-mt_tRNA-Leu-TAG	2.34313	0.445083	1	0	0	7	0	0
AAACCTTGGTGCAAATCCAAATAAAAGTACC,mature-mt_tRNA-Leu-TAG	-0.391805	0.72119	26	11	24	57	0	3
AAACCTTGGTGCAAATCCAAATAAAAGTACCA,mature-mt_tRNA-Leu-TAG_CCA_end	-1.10074	0.10443	99	80	157	140	15	25
AAACCTTGTTCCCAG,mature-mt_tRNA-Leu-TAA	1.13197	0.77617	0	1	0	3	0	0
AAACCTTGTTCCCAGA,mature-mt_tRNA-Leu-TAA	-0.889136	0.827507	0	0	1	0	0	0
AAACCTTGTTCCCAGAGGTTCAAATCCT,mature-mt_tRNA-Leu-TAA	1.03442	0.799879	0	0	0	0	0	1
AAACCTTGTTCCCAGAGGTTCAAATCCTC,mature-mt_tRNA-Leu-TAA	0.0726449	0.985796	0	0	1	1	0	0
AAACCTTGTTCCCAGAGGTTCAAATCCTCT,mature-mt_tRNA-Leu-TAA	-0.237077	0.930058	0	2	2	4	0	0
AAACCTTGTTCCCAGAGGTTCAAATCCTCTC,mature-mt_tRNA-Leu-TAA	-0.397337	0.866084	1	4	0	0	1	2
AAACCTTGTTCCCAGAGGTTCAAATCCTCTCC,mature-mt_tRNA-Leu-TAA	-0.445666	0.860925	0	0	5	3	1	0
AAACCTTGTTCCCAGAGGTTCAAATCCTCTCCC,mature-mt_tRNA-Leu-TAA	-0.889136	0.827507	0	1	0	0	0	0
AAACCTTGTTCCCAGAGGTTCAAATCCTCTCCCT,mature-mt_tRNA-Leu-TAA	-3.15965	0.328949	2	0	3	0	0	0
AAACCTTGTTCCCAGAGGTTCAAATCCTCTCCCTAATA,mature-mt_tRNA-Leu-TAA_3_end	0.234851	0.942483	1	1	0	3	0	0
AAACCTTGTTCCCAGAGGTTCAAATCCTCTCCCTAATACC,mature-mt_tRNA-Leu-TAA	-2.5541	0.521517	3	0	0	0	0	0
AAACCTTGTTCCCAGAGGTTCAAATCCTCTCCCTAATACCA,mature-mt_tRNA-Leu-TAA_CCA_end	0.443648	0.877432	1	0	1	2	0	1
AAACGTTGGTTTAAA,mature-mt_tRNA-Met-CAT	-3.32758	0.332755	0	0	6	0	0	0
AAACGTTGGTTTAAAT,mature-mt_tRNA-Met-CAT	1.60709	0.692322	0	0	0	2	0	0
AAACGTTGGTTTAAATC,mature-mt_tRNA-Met-CAT	1.03442	0.799879	0	0	0	1	0	0
AAACGTTGGTTTAAATCC,mature-mt_tRNA-Met-CAT	2.09872	0.602152	0	0	0	0	2	0
AAACGTTGGTTTAAATCCTT,mature-mt_tRNA-Met-CAT	4.14154	0.0798106	0	0	0	3	2	4
AAACGTTGGTTTAAATCCTTCCCGTA,mature-mt_tRNA-Met-CAT	0.285005	0.936276	0	0	2	3	0	0
AAACGTTGGTTTAAATCCTTCCCGTACT,mature-mt_tRNA-Met-CAT	-0.889136	0.827507	1	0	0	0	0	0
AAACGTTGGTTTAAATCCTTCCCGTACTA,mature-mt_tRNA-Met-CAT_3_end	2.31491	0.563707	0	0	0	2	1	0
AAACGTTGGTTTAAATCCTTCCCGTACTAC,mature-mt_tRNA-Met-CAT	0.0726449	0.985796	1	0	0	1	0	0
AAACGTTGGTTTAAATCCTTCCCGTACTACC,mature-mt_tRNA-Met-CAT	-0.843874	0.520053	12	6	4	13	2	0
AAACGTTGGTTTAAATCCTTCCCGTACTACCA,mature-mt_tRNA-Met-CAT_CCA_end	-0.602618	0.298764	45	47	69	56	28	23
AAAGAATTACTTTGA,mature-mt_tRNA-Ile-GAT	2.74716	0.457093	0	0	0	0	1	2
AAAGAATTACTTTGAT,mature-mt_tRNA-Ile-GAT	1.03442	0.799879	0	0	0	1	0	0
AAAGAATTACTTTGATA,mature-mt_tRNA-Ile-GAT	3.32298	0.297512	0	0	0	1	4	0
AAAGAATTACTTTGATAG,mature-mt_tRNA-Ile-GAT	1.03442	0.799879	0	0	0	1	0	0
AAAGAATTACTTTGATAGA,mature-mt_tRNA-Ile-GAT	-1.8958	0.537421	2	0	2	1	0	0
AAAGAATTACTTTGATAGAG,mature-mt_tRNA-Ile-GAT	-0.296747	0.834625	3	4	8	12	0	2
AAAGAATTACTTTGATAGAGT,mature-mt_tRNA-Ile-GAT	0.384144	0.722279	6	4	9	18	7	2
AAAGAATTACTTTGATAGAGTA,mature-mt_tRNA-Ile-GAT	-0.344235	0.822882	10	0	2	7	2	2
AAAGAATTACTTTGATAGAGTAA,mature-mt_tRNA-Ile-GAT	1.03442	0.799879	0	0	0	0	0	1
AAAGAATTACTTTGATAGAGTAAA,mature-mt_tRNA-Ile-GAT	-0.293879	0.920535	0	0	4	4	0	0
AAAGAATTACTTTGATAGAGTAAAT,mature-mt_tRNA-Ile-GAT	3.13682	0.344436	0	0	0	3	0	2
AAAGAATTACTTTGATAGAGTAAATT,mature-mt_tRNA-Ile-GAT	0.422119	0.835629	6	0	0	4	5	0
AAAGAATTACTTTGATAGAGTAAATTA,mature-mt_tRNA-Ile-GAT	2.12292	0.507247	1	0	0	6	0	0
AAAGAATTACTTTGATAGAGTAAATTATAGAG,mature-mt_tRNA-Ile-GAT	-0.889136	0.827507	0	1	0	0	0	0
AAAGAATTACTTTGATAGAGTAAATTATAGAGG,mature-mt_tRNA-Ile-GAT	-0.741506	0.488729	8	9	8	8	2	5
AAAGAATTACTTTGATAGAGTAAATTATAGAGGT,mature-mt_tRNA-Ile-GAT	-3.44548	0.251565	3	0	3	0	0	0
AAAGAATTACTTTGATAGAGTAAATTATAGAGGTT,mature-mt_tRNA-Ile-GAT	-1.02081	0.379898	23	9	18	31	1	0
AAAGAATTACTTTGATAGAGTAAATTATAGAGGTTC,mature-mt_tRNA-Ile-GAT	-0.451262	0.727793	8	2	13	17	0	3
AAAGAATTACTTTGATAGAGTAAATTATAGAGGTTCA,mature-mt_tRNA-Ile-GAT	0.06294	0.985126	0	0	2	1	0	1
AAAGAATTACTTTGATAGAGTAAATTATAGAGGTTCAAG,mature-mt_tRNA-Ile-GAT	-1.96161	0.625864	2	0	0	0	0	0
AAAGACATATAGGAT,mature-mt_tRNA-Ser-TGA	-2.38337	0.381547	2	4	0	0	1	0
AAAGACATATAGGATA,mature-mt_tRNA-Ser-TGA	-2.5541	0.521517	3	0	0	0	0	0
AAAGACATATAGGATAT,mature-mt_tRNA-Ser-TGA	-1.83561	0.486415	2	0	4	2	0	0
AAAGACATATAGGATATG,mature-mt_tRNA-Ser-TGA	2.97385	0.393598	0	0	0	1	3	0
AAAGACATATAGGATATGAG,mature-mt_tRNA-Ser-TGA	3.79644	0.175691	0	0	0	5	0	3
AAAGACATATAGGATATGAGA,mature-mt_tRNA-Ser-TGA	4.08055	0.0920617	0	0	0	4	1	4
AAAGACATATAGGATATGAGATT,mature-mt_tRNA-Ser-TGA	-0.340517	0.895906	1	1	1	0	1	1
AAAGACATATAGGATATGAGATTG,mature-mt_tRNA-Ser-TGA	1.10495	0.405751	1	3	4	9	5	3
AAAGACATATAGGATATGAGATTGG,mature-mt_tRNA-Ser-TGA	-2.06386	0.180073	2	6	12	0	3	1
AAAGACATATAGGATATGAGATTGGCT,mature-mt_tRNA-Ser-TGA	0.410544	0.882573	0	2	1	0	0	3
AAAGACATATAGGATATGAGATTGGCTT,mature-mt_tRNA-Ser-TGA	-2.0175	0.380372	0	8	1	1	0	1
AAAGACATATAGGATATGAGATTGGCTTG,mature-mt_tRNA-Ser-TGA	1.56614	0.471879	0	3	0	1	1	5
AAAGACATATAGGATATGAGATTGGCTTGA,mature-mt_tRNA-Ser-TGA	-1.746	0.665753	0	0	2	0	0	0
AAAGATTGCAAGAAC,mature-mt_tRNA-Ser-GCT	-0.66193	0.657997	6	1	5	1	4	2
AAAGATTGCAAGAACT,mature-mt_tRNA-Ser-GCT	1.2036	0.349131	10	0	2	23	3	7
AAAGATTGCAAGAACTG,mature-mt_tRNA-Ser-GCT	0.191235	0.85801	19	3	7	31	2	7
AAAGATTGCAAGAACTGC,mature-mt_tRNA-Ser-GCT	0.333064	0.689827	49	12	14	88	14	13
AAAGATTGCAAGAACTGCT,mature-mt_tRNA-Ser-GCT	1.21411	0.127848	17	6	14	60	11	23
AAAGATTGCAAGAACTGCTA,mature-mt_tRNA-Ser-GCT	0.782843	0.557299	11	0	2	14	2	9
AAAGATTGCAAGAACTGCTAA,mature-mt_tRNA-Ser-GCT	3.79746	0.0813899	1	0	0	16	0	2
AAAGATTGCAAGAACTGCTAAT,mature-mt_tRNA-Ser-GCT	0.886693	0.438967	8	4	2	13	12	2
AAAGATTGCAAGAACTGCTAATT,mature-mt_tRNA-Ser-GCT	1.17166	0.431175	9	0	0	15	4	5
AAAGATTGCAAGAACTGCTAATTC,mature-mt_tRNA-Ser-GCT	1.06641	0.282516	7	8	3	28	6	7
AAAGATTGCAAGAACTGCTAATTCA,mature-mt_tRNA-Ser-GCT	-0.0854577	0.956862	9	6	1	20	0	0
AAAGATTGCAAGAACTGCTAATTCAT,mature-mt_tRNA-Ser-GCT	1.60709	0.692322	0	0	0	2	0	0
AAAGATTGCAAGAACTGCTAATTCATG,mature-mt_tRNA-Ser-GCT	1.09751	0.530998	2	0	5	18	1	0
AAAGATTGCAAGAACTGCTAATTCATGC,mature-mt_tRNA-Ser-GCT	-1.68448	0.62164	0	4	0	0	1	0
AAAGATTGCAAGAACTGCTAATTCATGCT,mature-mt_tRNA-Ser-GCT	-0.190537	0.903601	1	4	4	5	2	1
AAAGATTGCAAGAACTGCTAATTCATGCTT,mature-mt_tRNA-Ser-GCT	-0.802557	0.728893	1	5	0	1	0	2
AAAGATTGCAAGAACTGCTAATTCATGCTTC,mature-mt_tRNA-Ser-GCT	0.0281873	0.988239	2	0	5	6	0	2
AAAGATTGCAAGAACTGCTAATTCATGCTTCC,mature-mt_tRNA-Ser-GCT	-0.182523	0.939518	2	2	0	3	1	0
AAAGATTGCAAGAACTGCTAATTCATGCTTCCATG,mature-mt_tRNA-Ser-GCT	1.03442	0.799879	0	0	0	1	0	0
AAAGATTGCAAGAACTGCTAATTCATGCTTCCATGT,mature-mt_tRNA-Ser-GCT	1.03442	0.799879	0	0	0	1	0	0
AAAGATTGCAAGAACTGCTAATTCATGCTTCCATGTT,mature-mt_tRNA-Ser-GCT	-0.784214	0.846156	0	0	2	1	0	0
AAAGATTGCAAGAACTGCTAATTCATGCTTCCATGTTT,mature-mt_tRNA-Ser-GCT	-0.656307	0.67671	4	4	4	8	1	0
AAAGATTGCAAGAACTGCTAATTCATGCTTCCATGTTTA,mature-mt_tRNA-Ser-GCT	-3.24841	0.30853	4	0	1	0	0	0
AAAGATTGCAAGAACTGCTAATTCATGCTTCCATGTTTAA,mature-mt_tRNA-Ser-GCT	-0.889136	0.827507	1	0	0	0	0	0
AAAGCAAAGCACTGA,mature-mt_tRNA-Phe-GAA	-2.86013	0.41412	2	0	2	0	0	0
AAAGCAAAGCACTGAA,mature-mt_tRNA-Phe-GAA	0.84236	0.719837	0	4	0	2	0	4
AAAGCAAAGCACTGAAAATG,mature-mt_tRNA-Phe-GAA	2.17718	0.448892	1	0	0	3	0	2
AAAGCAAAGCACTGAAAATGCTTAGA,mature-mt_tRNA-Phe-GAA	1.03442	0.799879	0	0	0	0	1	0
AAAGCAAAGCACTGAAAATGCTTAGATGG,mature-mt_tRNA-Phe-GAA	-0.388046	0.883214	2	0	2	4	0	0
AAAGCAAAGCACTGAAAATGCTTAGATGGA,mature-mt_tRNA-Phe-GAA	-0.889136	0.827507	0	0	1	0	0	0
AAAGCAAAGCACTGAAAATGCTTAGATGGAT,mature-mt_tRNA-Phe-GAA	-0.750612	0.816562	0	1	2	2	0	0
AAAGCAAAGCACTGAAAATGCTTAGATGGATA,mature-mt_tRNA-Phe-GAA	-1.31544	0.55322	2	0	5	2	0	1
AAAGCAAAGCACTGAAAATGCTTAGATGGATAATT,mature-mt_tRNA-Phe-GAA	-2.32895	0.560157	0	0	3	0	0	0
AAAGCAAAGCACTGAAAATGCTTAGATGGATAATTGTA,mature-mt_tRNA-Phe-GAA	-0.889136	0.827507	0	0	1	0	0	0
AAAGCAAAGCACTGAAAATGCTTAGATGGATAATTGTAT,mature-mt_tRNA-Phe-GAA	1.03442	0.799879	0	0	0	1	0	0
AAAGCAATTGATTTG,mature-mt_tRNA-Ala-TGC	-0.889136	0.827507	0	0	1	0	0	0
AAAGCAATTGATTTGCATT,mature-mt_tRNA-Ala-TGC	1.27201	0.538312	1	1	1	0	3	3
AAAGCAATTGATTTGCATTCA,mature-mt_tRNA-Ala-TGC	2.09257	0.603263	0	0	0	3	0	0
AAAGCAATTGATTTGCATTCAA,mature-mt_tRNA-Ala-TGC	1.03442	0.799879	0	0	0	1	0	0
AAAGCAATTGATTTGCATTCAAT,mature-mt_tRNA-Ala-TGC	-0.689922	0.864759	0	2	0	1	0	0
AAAGCAATTGATTTGCATTCAATA,mature-mt_tRNA-Ala-TGC	2.96082	0.398907	0	0	0	4	1	0
AAAGCAATTGATTTGCATTCAATAG,mature-mt_tRNA-Ala-TGC	1.65798	0.390442	0	1	2	4	4	1
AAAGCAATTGATTTGCATTCAATAGA,mature-mt_tRNA-Ala-TGC	1.4014	0.448695	0	3	1	8	2	1
AAAGCAATTGATTTGCATTCAATAGAT,mature-mt_tRNA-Ala-TGC	-0.499191	0.875008	3	0	0	3	0	0
AAAGCAATTGATTTGCATTCAATAGATG,mature-mt_tRNA-Ala-TGC	-0.706796	0.751958	2	4	0	0	1	2
AAAGCAATTGATTTGCATTCAATAGATGTA,mature-mt_tRNA-Ala-TGC	0.0726449	0.985796	1	0	0	0	0	1
AAAGCAATTGATTTGCATTCAATAGATGTAG,mature-mt_tRNA-Ala-TGC	1.21989	0.54525	2	1	0	3	1	3
AAAGCAATTGATTTGCATTCAATAGATGTAGG,mature-mt_tRNA-Ala-TGC	-0.606251	0.496773	17	11	14	20	4	6
AAAGCAATTGATTTGCATTCAATAGATGTAGGA,mature-mt_tRNA-Ala-TGC	-0.452683	0.619123	21	9	12	20	3	10
AAAGCAATTGATTTGCATTCAATAGATGTAGGAT,mature-mt_tRNA-Ala-TGC	-0.968714	0.244268	61	10	47	52	13	6
AAAGCAATTGATTTGCATTCAATAGATGTAGGATG,mature-mt_tRNA-Ala-TGC	-0.561932	0.309658	189	111	181	213	55	82
AAAGCAATTGATTTGCATTCAATAGATGTAGGATGA,mature-mt_tRNA-Ala-TGC	-0.692327	0.371338	36	22	44	47	4	18
AAAGCAATTGATTTGCATTCAATAGATGTAGGATGAA,mature-mt_tRNA-Ala-TGC	-2.14356	0.046137	12	16	9	3	3	2
AAAGCAATTGATTTGCATTCAATAGATGTAGGATGAAG,mature-mt_tRNA-Ala-TGC	-0.973912	0.473558	8	2	6	3	1	4
AAAGCAATTGATTTGCATTCAATAGATGTAGGATGAAGT,mature-mt_tRNA-Ala-TGC	-1.63502	0.0676847	28	9	65	28	3	6
AAAGCAATTGATTTGCATTCAATAGATGTAGGATGAAGTCT,mature-mt_tRNA-Ala-TGC	-2.15131	0.452347	1	0	4	0	0	1
AAAGCAATTGATTTGCATTCAATAGATGTAGGATGAAGTCTT,mature-mt_tRNA-Ala-TGC	-2.37607	0.518092	1	1	1	0	0	0
AAAGCACTGAAAATG,mature-mt_tRNA-Phe-GAA	2.71795	0.465622	0	0	0	0	2	1
AAAGCACTGAAAATGCTTAGATGG,mature-mt_tRNA-Phe-GAA	-2.5541	0.521517	3	0	0	0	0	0
AAAGCACTGAAAATGCTTAGATGGATAATTG,mature-mt_tRNA-Phe-GAA	1.03442	0.799879	0	0	0	0	1	0
AAAGCACTGAAAATGCTTAGATGGATAATTGTATCCC,mature-mt_tRNA-Phe-GAA	1.03442	0.799879	0	0	0	0	1	0
AAAGCATCTGGCCTA,mature-mt_tRNA-Val-TAC	-0.889136	0.827507	0	0	1	0	0	0
AAAGCATCTGGCCTAC,mature-mt_tRNA-Val-TAC	-1.58613	0.645006	3	0	0	0	0	1
AAAGCATCTGGCCTACA,mature-mt_tRNA-Val-TAC	-0.889136	0.827507	1	0	0	0	0	0
AAAGCATCTGGCCTACAC,mature-mt_tRNA-Val-TAC	1.72354	0.620848	0	0	1	0	3	0
AAAGCATCTGGCCTACACC,mature-mt_tRNA-Val-TAC	2.57903	0.505223	0	0	0	1	0	2
AAAGCATCTGGCCTACACCCA,mature-mt_tRNA-Val-TAC	-0.922161	0.768644	2	0	1	2	0	0
AAAGCATCTGGCCTACACCCAGAAGATT,mature-mt_tRNA-Val-TAC	3.42901	0.313839	0	0	0	0	5	0
AAAGCATCTGGCCTACACCCAGAAGATTT,mature-mt_tRNA-Val-TAC	-0.146556	0.859547	11	17	13	20	6	11
AAAGCATCTGGCCTACACCCAGAAGATTTC,mature-mt_tRNA-Val-TAC	3.94344	0.191535	0	0	0	11	0	0
AAAGCATCTGGCCTACACCCAGAAGATTTCAT,mature-mt_tRNA-Val-TAC	2.71795	0.465622	0	0	0	0	2	1
AAAGCATCTGGCCTACACCCAGAAGATTTCATG,mature-mt_tRNA-Val-TAC	1.38065	0.116748	5	7	7	25	9	15
AAAGCATCTGGCCTACACCCAGAAGATTTCATGA,mature-mt_tRNA-Val-TAC	0.741831	0.541777	9	3	2	14	1	10
AAAGCATCTGGCCTACACCCAGAAGATTTCATGAC,mature-mt_tRNA-Val-TAC	0.145844	0.8891	8	3	10	13	4	7
AAAGCATCTGGCCTACACCCAGAAGATTTCATGACC,mature-mt_tRNA-Val-TAC	0.429522	0.577065	10	18	17	36	18	8
AAAGCATCTGGCCTACACCCAGAAGATTTCATGACCA,mature-mt_tRNA-Val-TAC	1.39533	0.683076	0	0	1	2	0	1
AAAGCATCTGGCCTACACCCAGAAGATTTCATGACCAAT,mature-mt_tRNA-Val-TAC	-0.85037	0.824731	1	1	0	1	0	0
AAAGCATCTGGCCTACACCCAGAAGATTTCATGACCAATGAAC,mature-mt_tRNA-Val-TAC	-0.889136	0.827507	0	0	1	0	0	0
AAAGCATCTGGCCTACACCCAGAAGATTTCATGACCAATGAACA,mature-mt_tRNA-Val-TAC	-0.889136	0.827507	0	1	0	0	0	0
AAAGCCCTAAGAAAACAC,mature-mt_tRNA-Trp-TCA	2.09872	0.602152	0	0	0	0	2	0
AAAGCCCTAAGAAAACACAC,mature-mt_tRNA-Trp-TCA	2.69004	0.499796	0	0	0	0	3	0
AAAGCCCTAAGAAAACACACAAGTTTA,mature-mt_tRNA-Trp-TCA	1.03442	0.799879	0	0	0	1	0	0
AAAGCCCTAAGAAAACACACAAGTTTAACTTCTGC,mature-mt_tRNA-Trp-TCA	-0.889136	0.827507	0	0	1	0	0	0
AAAGCCCTAAGAAAACACACAAGTTTAACTTCTGCCA,mature-mt_tRNA-Trp-TCA_CCA_end	-1.36777	0.716888	0	0	3	1	0	0
AAAGGTCCCCGGTTC,mature-tRNA-Val-CAC;mature-tRNA-Val-AAC;mature-tRNA-Gly-ACC	0.521724	0.829964	2	1	0	1	0	3
AAAGGTCCCCGGTTCG,mature-tRNA-Val-CAC;mature-tRNA-Val-AAC;mature-tRNA-Gly-ACC	-1.97121	0.27807	0	15	2	2	2	0
AAAGGTCCCCGGTTCGA,mature-tRNA-Val-CAC;mature-tRNA-Val-AAC;mature-tRNA-Gly-ACC	3.7344	0.190827	0	0	0	0	3	3
AAAGGTCCCCGGTTCGAA,mature-tRNA-Val-CAC;mature-tRNA-Val-AAC;mature-tRNA-Gly-ACC	-0.889136	0.827507	0	1	0	0	0	0
AAAGGTCCCCGGTTCGAAAC,mature-tRNA-Val-CAC;mature-tRNA-Val-AAC;mature-tRNA-Gly-ACC	0.0726449	0.985796	0	1	0	1	0	0
AAAGGTCCCCGGTTCGAAACCGGGCGGA,mature-tRNA-Val-CAC;mature-tRNA-Val-AAC;mature-tRNA-Gly-ACC	1.03442	0.799879	0	0	0	1	0	0
AAAGGTCCCCGGTTCGAAACCGGGCGGAAA,mature-tRNA-Val-CAC;mature-tRNA-Val-AAC;mature-tRNA-Gly-ACC	0.0726449	0.985796	1	0	0	1	0	0
AAAGGTCCCCGGTTCGAAACCGGGCGGAAAC,mature-tRNA-Val-CAC;mature-tRNA-Val-AAC;mature-tRNA-Gly-ACC	1.52997	0.575597	0	1	1	7	0	0
AAAGGTCCCCGGTTCGAAACCGGGCGGAAACA,mature-tRNA-Val-CAC_3_end;mature-tRNA-Val-AAC_3_end;mature-tRNA-Gly-ACC_3_end	0.776788	0.788586	0	3	0	6	0	0
AAAGGTCCCCGGTTCGAAACCGGGCGGAAACACC,mature-tRNA-Val-CAC;mature-tRNA-Val-AAC;mature-tRNA-Gly-ACC	0.206479	0.9478	0	3	0	4	0	0
AAAGGTCCCCGGTTCGAAACCGGGCGGAAACACCA,mature-tRNA-Val-CAC_CCA_end;mature-tRNA-Val-AAC_CCA_end;mature-tRNA-Gly-ACC_CCA_end	0.429573	0.849092	2	1	1	7	0	0
AAAGGTCCCTGGTTC,mature-tRNA-Phe-GAA	-1.58641	0.646833	3	0	0	0	1	0
AAAGGTCCCTGGTTCAATCCCGGGTTTCGG,mature-tRNA-Phe-GAA	-0.889136	0.827507	1	0	0	0	0	0
AAAGGTCCCTGGTTCAATCCCGGGTTTCGGCACC,mature-tRNA-Phe-GAA	2.18517	0.586649	0	0	0	0	0	2
AAAGGTCCCTGGTTCG,mature-tRNA-Phe-GAA	1.2626	0.645374	1	0	1	0	0	4
AAAGGTCCCTGGTTCGA,mature-tRNA-Phe-GAA	-3.22527	0.360597	0	6	0	0	0	0
AAAGGTCCCTGGTTCGAT,mature-tRNA-Phe-GAA	2.18517	0.586649	0	0	0	0	0	2
AAAGGTCCCTGGTTCGATCC,mature-tRNA-Phe-GAA	3.52328	0.207262	0	0	0	5	1	1
AAAGGTCCCTGGTTCGATCCC,mature-tRNA-Phe-GAA	0.0726449	0.985796	0	1	0	0	1	0
AAAGGTCCCTGGTTCGATCCCG,mature-tRNA-Phe-GAA	2.49607	0.532374	0	0	0	4	0	0
AAAGGTCCCTGGTTCGATCCCGGGTTTCG,mature-tRNA-Phe-GAA	2.18517	0.586649	0	0	0	0	0	2
AAAGGTCCCTGGTTCGATCCCGGGTTTCGG,mature-tRNA-Phe-GAA	-0.553973	0.771808	8	0	1	7	0	1
AAAGGTCCCTGGTTCGATCCCGGGTTTCGGC,mature-tRNA-Phe-GAA	1.03442	0.799879	0	0	0	0	1	0
AAAGGTCCCTGGTTCGATCCCGGGTTTCGGCA,mature-tRNA-Phe-GAA_3_end	-0.7807	0.669811	4	3	1	3	2	0
AAAGGTCCCTGGTTCGATCCCGGGTTTCGGCAC,mature-tRNA-Phe-GAA	-2.00492	0.542501	4	0	0	1	0	0
AAAGGTCCCTGGTTCGATCCCGGGTTTCGGCACC,mature-tRNA-Phe-GAA	-1.12093	0.439411	8	6	10	0	0	9
AAAGGTCCCTGGTTCGATCCCGGGTTTCGGCACCA,mature-tRNA-Phe-GAA_CCA_end	-1.84759	0.306355	4	5	4	0	0	3
AAAGGTTCCGGGTTC,mature-tRNA-Arg-TCT	1.18866	0.628671	0	3	0	2	4	0
AAAGGTTCCGGGTTCG,mature-tRNA-Arg-TCT	2.0765	0.182461	0	7	1	0	22	4
AAAGGTTCCGGGTTCGA,mature-tRNA-Arg-TCT	-0.234206	0.899266	4	0	4	6	2	0
AAAGGTTCCGGGTTCGAG,mature-tRNA-Arg-TCT	-0.555686	0.857823	0	4	0	0	0	2
AAAGGTTCCGGGTTCGAGT,mature-tRNA-Arg-TCT	0.0726449	0.985796	0	1	0	1	0	0
AAAGGTTCCGGGTTCGAGTC,mature-tRNA-Arg-TCT	3.42901	0.313839	0	0	0	0	5	0
AAAGGTTCCGGGTTCGAGTCCCGGC,mature-tRNA-Arg-TCT	-1.746	0.665753	0	0	2	0	0	0
AAAGGTTCCGGGTTCGAGTCCCGGCGGA,mature-tRNA-Arg-TCT	3.79644	0.175691	0	0	0	5	0	3
AAAGGTTCCGGGTTCGAGTCCCGGCGGAG,mature-tRNA-Arg-TCT	0.106417	0.973171	2	0	0	0	1	1
AAAGGTTCCGGGTTCGAGTCCCGGCGGAGT,mature-tRNA-Arg-TCT	0.0935686	0.929662	4	12	7	16	2	7
AAAGGTTCCGGGTTCGAGTCCCGGCGGAGTC,mature-tRNA-Arg-TCT	-0.354577	0.877068	3	3	0	6	0	0
AAAGGTTCCGGGTTCGAGTCCCGGCGGAGTCG,mature-tRNA-Arg-TCT_3_end	0.826476	0.578029	5	3	1	15	4	0
AAAGGTTCCGGGTTCGAGTCCCGGCGGAGTCGC,mature-tRNA-Arg-TCT	-0.679901	0.497647	30	3	12	18	3	10
AAAGGTTCCGGGTTCGAGTCCCGGCGGAGTCGCC,mature-tRNA-Arg-TCT	-0.257185	0.694254	31	69	20	49	25	24
AAAGGTTCCGGGTTCGAGTCCCGGCGGAGTCGCCA,mature-tRNA-Arg-TCT_CCA_end	-0.478275	0.54191	9	53	71	14	40	26
AAAGGTTGCGGGTTC,mature-tRNA-Arg-TCT	4.27847	0.127004	0	0	0	0	9	0
AAAGGTTGCGGGTTCGA,mature-tRNA-Arg-TCT	2.69004	0.499796	0	0	0	0	3	0
AAAGGTTGCGGGTTCGAGTCCCGCCAGAGTC,mature-tRNA-Arg-TCT	1.03442	0.799879	0	0	0	1	0	0
AAAGGTTGCGGGTTCGAGTCCCGCCAGAGTCG,mature-tRNA-Arg-TCT_3_end	-0.365825	0.896187	0	5	0	0	3	0
AAAGGTTGCGGGTTCGAGTCCCGCCAGAGTCGCC,mature-tRNA-Arg-TCT	-2.86013	0.41412	2	0	2	0	0	0
AAAGGTTGCGGGTTCGAGTCCCGCCAGAGTCGCCA,mature-tRNA-Arg-TCT_CCA_end	-2.71922	0.457784	0	1	3	0	0	0
AAAGGTTGGTGGTTCAAGCCCACCCAGGGACGCCA,mature-tRNA-Asn-GTT_CCA_end	2.09257	0.603263	0	0	0	3	0	0
AAAGGTTGGTGGTTCGAG,mature-tRNA-Asn-GTT	2.57967	0.332987	1	0	0	5	0	2
AAAGGTTGGTGGTTCGAGC,mature-tRNA-Asn-GTT	1.03442	0.799879	0	0	0	1	0	0
AAAGGTTGGTGGTTCGAGCC,mature-tRNA-Asn-GTT	-0.889136	0.827507	0	0	1	0	0	0
AAAGGTTGGTGGTTCGAGCCCA,mature-tRNA-Asn-GTT	2.18517	0.586649	0	0	0	0	0	2
AAAGGTTGGTGGTTCGAGCCCACCCAGGG,mature-tRNA-Asn-GTT	0.563743	0.833236	0	0	3	1	3	0
AAAGGTTGGTGGTTCGAGCCCACCCAGGGA,mature-tRNA-Asn-GTT	-0.889136	0.827507	1	0	0	0	0	0
AAAGGTTGGTGGTTCGAGCCCACCCAGGGAC,mature-tRNA-Asn-GTT	2.49607	0.532374	0	0	0	4	0	0
AAAGGTTGGTGGTTCGAGCCCACCCAGGGACG,mature-tRNA-Asn-GTT_3_end	-1.78237	0.606166	0	0	4	1	0	0
AAAGGTTGGTGGTTCGAGCCCACCCAGGGACGC,mature-tRNA-Asn-GTT	-2.26375	0.571589	0	2	1	0	0	0
AAAGGTTGGTGGTTCGAGCCCACCCAGGGACGCC,mature-tRNA-Asn-GTT	0.106032	0.975471	0	2	0	1	1	0
AAAGGTTGGTGGTTCGAGCCCACCCAGGGACGCCA,mature-tRNA-Asn-GTT_CCA_end	-4.49751	0.00880905	6	11	9	0	1	0
AAAGGTTGTGGGTTC,mature-tRNA-Arg-TCT	4.5749	0.0612832	0	0	0	0	10	1
AAAGGTTGTGGGTTCG,mature-tRNA-Arg-TCT	-0.890233	0.70734	0	5	2	0	3	0
AAAGGTTGTGGGTTCGA,mature-tRNA-Arg-TCT	0.414411	0.882362	0	3	0	0	1	2
AAAGGTTGTGGGTTCGAATC,mature-tRNA-Arg-TCT	-0.889136	0.827507	0	1	0	0	0	0
AAAGGTTGTGGGTTCGAATCCCACCAGAGTCG,mature-tRNA-Arg-TCT_3_end	0.272726	0.938726	0	0	2	0	2	0
AAAGGTTGTGGGTTCGAATCCCACCAGAGTCGC,mature-tRNA-Arg-TCT	1.03442	0.799879	0	0	0	0	1	0
AAAGGTTGTGGGTTCGAATCCCACCAGAGTCGCC,mature-tRNA-Arg-TCT	0.0726449	0.985796	1	0	0	1	0	0
AAAGGTTGTGGGTTCGAATCCCACCAGAGTCGCCA,mature-tRNA-Arg-TCT_CCA_end	-0.764618	0.69814	1	4	2	2	2	0
AAAGGTTGTGGGTTCGAGTC,mature-tRNA-Arg-TCT	-1.746	0.665753	0	0	2	0	0	0
AAAGGTTGTGGGTTCGAGTCC,mature-tRNA-Arg-TCT	1.03442	0.799879	0	0	0	0	0	1
AAAGGTTGTGGGTTCGAGTCCCACC,mature-tRNA-Arg-TCT	3.42901	0.313839	0	0	0	0	5	0
AAAGGTTGTGGGTTCGAGTCCCACCAGAGTCG,mature-tRNA-Arg-TCT_3_end	-2.64177	0.506839	0	4	0	0	0	0
AAAGGTTGTGGGTTCGAGTCCCACCAGAGTCGC,mature-tRNA-Arg-TCT	-1.76851	0.422056	1	3	3	1	1	0
AAAGGTTGTGGGTTCGAGTCCCACCAGAGTCGCC,mature-tRNA-Arg-TCT	1.13081	0.311714	2	9	2	10	8	8
AAAGGTTGTGGGTTCGAGTCCCACCAGAGTCGCCA,mature-tRNA-Arg-TCT_CCA_end	-1.02436	0.393425	4	9	11	1	5	4
AAAGTTAAATTATAGAT,mature-mt_tRNA-Asp-GTC	2.57903	0.505223	0	0	0	1	0	2
AAAGTTAAATTATAGATC,mature-mt_tRNA-Asp-GTC	1.84318	0.129256	4	0	6	9	21	4
AAAGTTAAATTATAGATCA,mature-mt_tRNA-Asp-GTC	2.39123	0.2063	3	0	0	7	10	0
AAAGTTAAATTATAGATCAA,mature-mt_tRNA-Asp-GTC	1.64312	0.470812	0	1	1	3	2	1
AAAGTTAAATTATAGATCAAT,mature-mt_tRNA-Asp-GTC	1.80514	0.00891427	41	25	11	154	103	30
AAAGTTAAATTATAGATCAATA,mature-mt_tRNA-Asp-GTC	0.979047	0.490615	5	0	4	16	2	3
AAAGTTAAATTATAGATCAATAA,mature-mt_tRNA-Asp-GTC	-1.001	0.76637	3	0	0	2	0	0
AAAGTTAAATTATAGATCAATAAT,mature-mt_tRNA-Asp-GTC	0.232947	0.880687	3	4	2	7	0	4
AAAGTTAAATTATAGATCAATAATC,mature-mt_tRNA-Asp-GTC	0.67639	0.652526	5	0	4	13	1	3
AAAGTTAAATTATAGATCAATAATCT,mature-mt_tRNA-Asp-GTC	1.32302	0.56503	3	0	0	0	6	1
AAAGTTAAATTATAGATCAATAATCTA,mature-mt_tRNA-Asp-GTC	3.07206	0.41318	0	0	0	6	0	0
AAAGTTAAATTATAGATCAATAATCTAT,mature-mt_tRNA-Asp-GTC	0.0726449	0.985796	1	0	0	1	0	0
AAAGTTAAATTATAGATCAATAATCTATA,mature-mt_tRNA-Asp-GTC	0.888981	0.470129	5	4	2	17	3	3
AAAGTTAAATTATAGATCAATAATCTATAT,mature-mt_tRNA-Asp-GTC	0.90275	0.461211	3	4	6	23	4	1
AAAGTTAAATTATAGATCAATAATCTATATA,mature-mt_tRNA-Asp-GTC	0.229198	0.822532	11	6	8	24	2	7
AAAGTTAAATTATAGATCAATAATCTATATAT,mature-mt_tRNA-Asp-GTC	-0.299503	0.863704	2	4	2	5	2	0
AAAGTTAAATTATAGATCAATAATCTATATATC,mature-mt_tRNA-Asp-GTC	-0.293162	0.840626	3	1	11	8	5	0
AAAGTTAAATTATAGATCAATAATCTATATATCT,mature-mt_tRNA-Asp-GTC	-1.5881	0.658081	3	0	0	1	0	0
AAAGTTAAATTATAGATCAATAATCTATATATCTT,mature-mt_tRNA-Asp-GTC	-0.889136	0.827507	0	0	1	0	0	0
AAAGTTAAATTATAGATCAATAATCTATATATCTTA,mature-mt_tRNA-Asp-GTC_3_end	-0.889136	0.827507	1	0	0	0	0	0
AAAGTTAAATTATAGATCAATAATCTATATATCTTACC,mature-mt_tRNA-Asp-GTC	-1.96161	0.625864	2	0	0	0	0	0
AAAGTTAAATTATAGATCAATAATCTATATATCTTACCA,mature-mt_tRNA-Asp-GTC_CCA_end	-0.787129	0.822421	0	0	3	2	0	0
AAAGTTAAATTATAGGTCAATAATCTATATAT,mature-mt_tRNA-Asp-GTC	-0.889136	0.827507	0	1	0	0	0	0
AAAGTTAGAGACCTT,mature-mt_tRNA-Lys-TTT	0.222656	0.723965	49	52	18	56	38	41
AAAGTTAGAGACCTTA,mature-mt_tRNA-Lys-TTT	-0.609925	0.828443	0	0	5	4	0	0
AAAGTTAGAGACCTTAA,mature-mt_tRNA-Lys-TTT	-0.889136	0.827507	1	0	0	0	0	0
AAAGTTAGAGACCTTAAA,mature-mt_tRNA-Lys-TTT	0.874666	0.813267	1	0	0	1	1	0
AAAGTTAGAGACCTTAAAAT,mature-mt_tRNA-Lys-TTT	-0.889136	0.827507	1	0	0	0	0	0
AAAGTTAGAGACCTTAAAATCT,mature-mt_tRNA-Lys-TTT	-1.96161	0.625864	2	0	0	0	0	0
AAAGTTAGAGACCTTAAAATCTCC,mature-mt_tRNA-Lys-TTT	2.53396	0.391764	1	0	0	8	0	0
AAAGTTAGAGACCTTAAAATCTCCATA,mature-mt_tRNA-Lys-TTT	-1.44381	0.67063	1	0	2	1	0	0
AAAGTTAGAGACCTTAAAATCTCCATAG,mature-mt_tRNA-Lys-TTT	1.24007	0.523933	3	1	0	8	0	3
AAAGTTAGAGACCTTAAAATCTCCATAGT,mature-mt_tRNA-Lys-TTT	-0.238572	0.719079	19	41	34	22	29	21
AAAGTTAGAGACCTTAAAATCTCCATAGTG,mature-mt_tRNA-Lys-TTT	-0.00668659	0.996644	2	2	4	1	4	2
AAAGTTAGAGACCTTAAAATCTCCATAGTGA,mature-mt_tRNA-Lys-TTT_3_end	-1.64343	0.32784	3	9	4	6	0	0
AAAGTTAGAGACCTTAAAATCTCCATAGTGAC,mature-mt_tRNA-Lys-TTT	1.16505	0.443153	8	0	1	24	2	1
AAAGTTAGAGACCTTAAAATCTCCATAGTGACC,mature-mt_tRNA-Lys-TTT	-0.172109	0.857369	28	16	8	49	4	4
AAAGTTAGAGACCTTAAAATCTCCATAGTGACCA,mature-mt_tRNA-Lys-TTT_CCA_end	-0.497959	0.367612	109	118	122	172	39	54
AAATAAACCTCCTTA,mature-mt_tRNA-His-GTG	-1.746	0.665753	0	0	2	0	0	0
AAATAAACCTCCTTAT,mature-mt_tRNA-His-GTG	-2.23023	0.577509	0	3	0	0	0	0
AAATAAACCTCCTTATT,mature-mt_tRNA-His-GTG	-0.889136	0.827507	0	1	0	0	0	0
AAATAAACCTCCTTATTC,mature-mt_tRNA-His-GTG	-0.850583	0.758626	2	0	2	0	2	0
AAATAAACCTCCTTATTCA,mature-mt_tRNA-His-GTG	1.3413	0.520257	0	2	1	6	1	1
AAATAAACCTCCTTATTCACC,mature-mt_tRNA-His-GTG_3_end	0.521799	0.785705	4	2	0	10	1	0
AAATAAACCTCCTTATTCACCC,mature-mt_tRNA-His-GTG	0.265576	0.851418	5	2	3	11	1	2
AAATAAACCTCCTTATTCACCCC,mature-mt_tRNA-His-GTG	0.758648	0.345903	13	21	10	10	29	25
AAATAAACCTCCTTATTCACCCCA,mature-mt_tRNA-His-GTG_CCA_end	-0.00694235	0.991399	16	43	36	35	30	23
AAATATGTCTGATAAAAG,mature-mt_tRNA-Ile-GAT	-1.96161	0.625864	2	0	0	0	0	0
AAATATGTCTGATAAAAGA,mature-mt_tRNA-Ile-GAT	2.49607	0.532374	0	0	0	4	0	0
AAATATGTCTGATAAAAGAAT,mature-mt_tRNA-Ile-GAT	1.03442	0.799879	0	0	0	0	0	1
AAATATGTCTGATAAAAGAATT,mature-mt_tRNA-Ile-GAT	1.03442	0.799879	0	0	0	0	1	0
AAATATGTCTGATAAAAGAATTA,mature-mt_tRNA-Ile-GAT	-0.728014	0.743718	1	0	7	6	0	0
AAATATGTCTGATAAAAGAATTAC,mature-mt_tRNA-Ile-GAT	3.24496	0.166171	1	0	0	5	0	5
AAATATGTCTGATAAAAGAATTACT,mature-mt_tRNA-Ile-GAT	-2.00492	0.542501	4	0	0	1	0	0
AAATATGTCTGATAAAAGAATTACTT,mature-mt_tRNA-Ile-GAT	-2.86013	0.41412	2	0	2	0	0	0
AAATATGTCTGATAAAAGAATTACTTT,mature-mt_tRNA-Ile-GAT	1.60709	0.692322	0	0	0	2	0	0
AAATATGTCTGATAAAAGAATTACTTTG,mature-mt_tRNA-Ile-GAT	-0.889136	0.827507	0	1	0	0	0	0
AAATATGTCTGATAAAAGAATTACTTTGA,mature-mt_tRNA-Ile-GAT	1.03442	0.799879	0	0	0	1	0	0
AAATATGTCTGATAAAAGAATTACTTTGAT,mature-mt_tRNA-Ile-GAT	0.0920247	0.966315	2	1	1	4	1	0
AAATATGTCTGATAAAAGAATTACTTTGATA,mature-mt_tRNA-Ile-GAT	0.746273	0.810854	2	0	0	0	0	3
AAATATGTCTGATAAAAGAATTACTTTGATAGAG,mature-mt_tRNA-Ile-GAT	2.09257	0.603263	0	0	0	3	0	0
AAATATGTCTGATAAAAGAATTACTTTGATAGAGT,mature-mt_tRNA-Ile-GAT	-0.209471	0.956756	0	0	2	2	0	0
AAATATGTCTGATAAAAGAATTACTTTGATAGAGTAAA,mature-mt_tRNA-Ile-GAT	1.03442	0.799879	0	0	0	1	0	0
AAATATGTCTGATAAAAGAATTACTTTGATAGAGTAAAT,mature-mt_tRNA-Ile-GAT	1.03442	0.799879	0	0	0	1	0	0
AAATCAATTACATAACTTTG,mature-mt_tRNA-Asp-GTC	0.645315	0.873754	1	0	0	2	0	0
AAATCAATTACATAACTTTGT,mature-mt_tRNA-Asp-GTC	-0.796132	0.732878	1	0	6	5	0	0
AAATCAATTACATAACTTTGTC,mature-mt_tRNA-Asp-GTC	0.817652	0.53661	9	0	5	26	2	3
AAATCAATTACATAACTTTGTCA,mature-mt_tRNA-Asp-GTC	1.59361	0.444692	0	3	0	3	3	2
AAATCAATTACATAACTTTGTCAA,mature-mt_tRNA-Asp-GTC	-0.372372	0.878784	2	0	3	5	0	0
AAATCAATTACATAACTTTGTCAAA,mature-mt_tRNA-Asp-GTC	1.03442	0.799879	0	0	0	1	0	0
AAATCAATTACATAACTTTGTCAAAG,mature-mt_tRNA-Asp-GTC	0.572882	0.835757	3	0	0	0	0	4
AAATCAATTACATAACTTTGTCAAAGT,mature-mt_tRNA-Asp-GTC	0.373379	0.716906	7	8	5	19	5	4
AAATCAATTACATAACTTTGTCAAAGTT,mature-mt_tRNA-Asp-GTC	-0.925292	0.391095	14	6	7	8	5	2
AAATCAATTACATAACTTTGTCAAAGTTA,mature-mt_tRNA-Asp-GTC	0.237359	0.905671	0	2	3	4	1	1
AAATCAATTACATAACTTTGTCAAAGTTAA,mature-mt_tRNA-Asp-GTC	-1.85677	0.645151	1	0	1	0	0	0
AAATCAATTACATAACTTTGTCAAAGTTAAA,mature-mt_tRNA-Asp-GTC	-2.13518	0.393279	5	0	2	2	0	0
AAATCAATTACATAACTTTGTCAAAGTTAAAT,mature-mt_tRNA-Asp-GTC	2.81066	0.480072	0	0	0	5	0	0
AAATCAATTACATAACTTTGTCAAAGTTAAATT,mature-mt_tRNA-Asp-GTC	-1.36332	0.46322	1	6	3	3	0	1
AAATCAATTACATAACTTTGTCAAAGTTAAATTAT,mature-mt_tRNA-Asp-GTC	-0.889136	0.827507	0	1	0	0	0	0
AAATCAATTACATAACTTTGTCAAAGTTAAATTATAGA,mature-mt_tRNA-Asp-GTC	-0.787129	0.822421	0	0	3	2	0	0
AAATCAATTACATAACTTTGTCAAAGTTAAATTATAGAT,mature-mt_tRNA-Asp-GTC	-1.69942	0.674478	0	1	1	0	0	0
AAATCAATTACATAACTTTGTCAAAGTTAAATTATAGATCA,mature-mt_tRNA-Asp-GTC	-0.889136	0.827507	0	0	1	0	0	0
AAATCACGTCGGGGT,mature-tRNA-Trp-CCA	1.35057	0.659433	0	2	0	6	0	0
AAATCACGTCGGGGTCA,mature-tRNA-Trp-CCA_3_end	1.13517	0.769057	1	0	0	3	0	0
AAATCACGTCGGGGTCAC,mature-tRNA-Trp-CCA	-0.3381	0.81986	9	5	0	1	5	4
AAATCACGTCGGGGTCACC,mature-tRNA-Trp-CCA	-0.770893	0.300535	21	81	15	23	20	19
AAATCACGTCGGGGTCACCA,mature-tRNA-Trp-CCA_CCA_end	0.547763	0.468959	5	45	29	29	40	31
AAATCCAAATAAAAG,mature-mt_tRNA-Leu-TAG	1.41342	0.0587882	12	11	8	24	28	25
AAATCCAAATAAAAGT,mature-mt_tRNA-Leu-TAG	-0.000146669	0.999877	20	6	7	24	5	8
AAATCCAAATAAAAGTA,mature-mt_tRNA-Leu-TAG_3_end	0.575743	0.570241	42	19	5	118	3	8
AAATCCAAATAAAAGTAC,mature-mt_tRNA-Leu-TAG	0.288323	0.730044	74	28	14	138	28	9
AAATCCAAATAAAAGTACC,mature-mt_tRNA-Leu-TAG	0.363393	0.515151	237	215	108	502	162	123
AAATCCAAATAAAAGTACCA,mature-mt_tRNA-Leu-TAG_CCA_end	0.81887	0.0620595	789	999	977	1897	1737	1041
AAATCCCGGACGAGC,mature-tRNA-Pro-TGG;mature-tRNA-Pro-CGG;mature-tRNA-Pro-AGG	3.42901	0.313839	0	0	0	0	5	0
AAATCCCGGACGAGCC,mature-tRNA-Pro-TGG;mature-tRNA-Pro-CGG;mature-tRNA-Pro-AGG	2.49607	0.532374	0	0	0	4	0	0
AAATCCCGGACGAGCCC,mature-tRNA-Pro-TGG_3_end;mature-tRNA-Pro-CGG_3_end;mature-tRNA-Pro-AGG_3_end	0.620985	0.781285	1	3	0	0	4	1
AAATCCCGGACGAGCCCC,mature-tRNA-Pro-TGG;mature-tRNA-Pro-CGG;mature-tRNA-Pro-AGG	-0.138776	0.96632	0	3	0	0	0	2
AAATCCCGGACGAGCCCCC,mature-tRNA-Pro-TGG;mature-tRNA-Pro-CGG;mature-tRNA-Pro-AGG	1.03442	0.799879	0	0	0	0	1	0
AAATCCCGGACGAGCCCCCA,mature-tRNA-Pro-TGG_CCA_end;mature-tRNA-Pro-CGG_CCA_end;mature-tRNA-Pro-AGG_CCA_end	2.36787	0.31064	0	2	0	0	6	2
AAATCCGGGTGCCCCCTCC,mature-tRNA-Cys-GCA	0.0726449	0.985796	0	0	1	1	0	0
AAATCCGGGTGCCCCCTCCA,mature-tRNA-Cys-GCA_CCA_end	2.52337	0.268693	0	0	2	0	1	8
AAATCCTCTCCCTAA,mature-mt_tRNA-Leu-TAA	3.51289	0.244193	0	0	0	2	4	0
AAATCCTCTCCCTAAT,mature-mt_tRNA-Leu-TAA	-0.889136	0.827507	0	1	0	0	0	0
AAATCCTCTCCCTAATA,mature-mt_tRNA-Leu-TAA_3_end	-0.631419	0.803732	2	3	0	4	0	0
AAATCCTCTCCCTAATAC,mature-mt_tRNA-Leu-TAA	0.828715	0.515715	11	0	5	21	11	1
AAATCCTCTCCCTAATACC,mature-mt_tRNA-Leu-TAA	-0.12902	0.826889	101	93	43	111	76	35
AAATCCTCTCCCTAATACCA,mature-mt_tRNA-Leu-TAA_CCA_end	0.683174	0.201027	108	119	131	162	260	110
AAATCCTCTTTTTACC,mature-mt_tRNA-Tyr-GTA	1.03442	0.799879	0	0	0	0	1	0
AAATCCTCTTTTTACCA,mature-mt_tRNA-Tyr-GTA_3_end	1.03442	0.799879	0	0	0	1	0	0
AAATCCTCTTTTTACCAC,mature-mt_tRNA-Tyr-GTA	2.01453	0.175846	6	0	0	13	12	2
AAATCCTCTTTTTACCACC,mature-mt_tRNA-Tyr-GTA	2.11821	0.00232324	40	32	13	77	204	59
AAATCCTCTTTTTACCACCA,mature-mt_tRNA-Tyr-GTA_CCA_end	1.35757	0.0144455	170	177	146	391	626	175
AAATCCTTCCCGTACT,mature-mt_tRNA-Met-CAT	0.999391	0.67739	3	0	0	1	5	0
AAATCCTTCCCGTACTA,mature-mt_tRNA-Met-CAT_3_end	0.238237	0.877061	2	4	2	7	1	2
AAATCCTTCCCGTACTAC,mature-mt_tRNA-Met-CAT	2.22403	0.129467	2	3	0	10	12	1
AAATCCTTCCCGTACTACC,mature-mt_tRNA-Met-CAT	1.33353	0.0989855	30	14	5	59	57	13
AAATCCTTCCCGTACTACCA,mature-mt_tRNA-Met-CAT_CCA_end	1.21309	0.025899	69	79	70	138	226	102
AAATCTCCATAGTGACC,mature-mt_tRNA-Lys-TTT	-1.26967	0.741953	0	3	0	1	0	0
AAATCTCCATAGTGACCA,mature-mt_tRNA-Lys-TTT_CCA_end	0.572133	0.487002	34	4	15	44	21	20
AAATCTCGCTGGGGCCTC,mature-tRNA-Thr-TGT	-0.889136	0.827507	1	0	0	0	0	0
AAATCTCGCTGGGGCCTCC,mature-tRNA-Thr-TGT	2.69004	0.499796	0	0	0	0	3	0
AAATCTCGCTGGGGCCTCCA,mature-tRNA-Thr-TGT_CCA_end	2.73592	0.0886683	2	2	0	1	21	1
AAATCTCGGTGGAAC,mature-tRNA-Gln-CTG	4.21179	0.0983684	0	0	0	4	6	0
AAATCTCGGTGGAACC,mature-tRNA-Gln-CTG	2.64242	0.188237	0	0	2	5	6	1
AAATCTCGGTGGAACCT,mature-tRNA-Gln-CTG_3_end	2.49344	0.216378	2	0	0	11	2	1
AAATCTCGGTGGAACCTC,mature-tRNA-Gln-CTG	0.568509	0.459705	8	34	13	29	33	13
AAATCTCGGTGGAACCTCC,mature-tRNA-Gln-CTG	0.580151	0.393949	12	91	70	112	95	36
AAATCTCGGTGGAACCTCCA,mature-tRNA-Gln-CTG_CCA_end	1.20025	0.0487306	90	453	466	706	996	377
AAATCTCGGTGGGACCTC,mature-tRNA-Gln-TTG;mature-tRNA-Gln-CTG	-1.67332	0.576251	0	6	0	2	0	0
AAATCTCGGTGGGACCTCC,mature-tRNA-Gln-TTG;mature-tRNA-Gln-CTG	0.654054	0.579286	2	6	5	7	9	3
AAATCTCGGTGGGACCTCCA,mature-tRNA-Gln-TTG_CCA_end;mature-tRNA-Gln-CTG_CCA_end	0.350205	0.578321	27	68	59	36	74	59
AAATCTCTACTAAGACTTC,mature-mt_tRNA-Cys-GCA	1.03442	0.799879	0	0	0	1	0	0
AAATCTCTACTAAGACTTCC,mature-mt_tRNA-Cys-GCA	0.0726449	0.985796	1	0	0	0	1	0
AAATCTCTACTAAGACTTCCA,mature-mt_tRNA-Cys-GCA_CCA_end	2.53396	0.391764	1	0	0	8	0	0
AAATGAAGATCTTCT,mature-mt_tRNA-Thr-TGT	-0.784298	0.845184	0	0	2	0	1	0
AAATGAAGATCTTCTC,mature-mt_tRNA-Thr-TGT	2.69004	0.499796	0	0	0	0	3	0
AAATGAAGATCTTCTCTT,mature-mt_tRNA-Thr-TGT	-1.27155	0.728213	0	3	0	0	0	1
AAATGAAGATCTTCTCTTCTC,mature-mt_tRNA-Thr-TGT	2.18517	0.586649	0	0	0	0	0	2
AAATGAAGATCTTCTCTTCTCA,mature-mt_tRNA-Thr-TGT	-2.23023	0.577509	0	3	0	0	0	0
AAATGAAGATCTTCTCTTCTCAAG,mature-mt_tRNA-Thr-TGT	2.09063	0.175935	3	1	0	6	8	3
AAATGAAGATCTTCTCTTCTCAAGACA,mature-mt_tRNA-Thr-TGT_3_end	-1.52913	0.42338	8	2	1	5	0	0
AAATGAAGATCTTCTCTTCTCAAGACAC,mature-mt_tRNA-Thr-TGT	3.29378	0.352189	0	0	0	7	0	0
AAATGAAGATCTTCTCTTCTCAAGACACC,mature-mt_tRNA-Thr-TGT	0.728423	0.633661	4	0	4	10	4	1
AAATGAAGATCTTCTCTTCTCAAGACACCA,mature-mt_tRNA-Thr-TGT_CCA_end	0.539027	0.341714	34	41	45	68	38	60
AAATGCTGTGTAGAAAT,mature-mt_tRNA-Glu-TTC	1.03442	0.799879	0	0	0	0	0	1
AAATGCTGTGTAGAAATA,mature-mt_tRNA-Glu-TTC_3_end	1.86141	0.58539	0	0	1	5	0	0
AAATGCTGTGTAGAAATAC,mature-mt_tRNA-Glu-TTC	1.03442	0.799879	0	0	0	1	0	0
AAATGCTGTGTAGAAATACC,mature-mt_tRNA-Glu-TTC	-1.09648	0.445835	8	4	2	4	2	1
AAATGCTGTGTAGAAATACCA,mature-mt_tRNA-Glu-TTC_CCA_end	0.320679	0.830478	5	0	5	9	4	1
AAATGCTTAGATGGATAATTGTATCCCA,mature-mt_tRNA-Phe-GAA	-0.889136	0.827507	0	0	1	0	0	0
AAATGGCTGAGTAAGCATTA,mature-mt_tRNA-Tyr-GTA	1.17335	0.743837	0	1	0	0	1	1
AAATGGCTGAGTAAGCATTAGACTGTA,mature-mt_tRNA-Tyr-GTA	-0.889136	0.827507	0	1	0	0	0	0
AAATGGTAGAGCGCTCGCT,mature-tRNA-Ala-AGC	1.03442	0.799879	0	0	0	0	1	0
AAATTAATGATTTCGAC,mature-mt_tRNA-Arg-TCG	2.09872	0.602152	0	0	0	0	2	0
AAATTAATGATTTCGACT,mature-mt_tRNA-Arg-TCG	1.29493	0.59515	0	1	2	9	0	0
AAATTAATGATTTCGACTC,mature-mt_tRNA-Arg-TCG	-0.0992586	0.971522	3	0	0	1	2	0
AAATTAATGATTTCGACTCA,mature-mt_tRNA-Arg-TCG	0.147351	0.930241	2	1	6	11	0	1
AAATTAATGATTTCGACTCAT,mature-mt_tRNA-Arg-TCG	2.09257	0.603263	0	0	0	3	0	0
AAATTAATGATTTCGACTCATT,mature-mt_tRNA-Arg-TCG	-0.378757	0.855885	3	0	5	8	0	0
AAATTAATGATTTCGACTCATTA,mature-mt_tRNA-Arg-TCG	0.0726449	0.985796	1	0	0	0	0	1
AAATTAATGATTTCGACTCATTAGA,mature-mt_tRNA-Arg-TCG	-0.348888	0.795154	3	6	4	2	3	4
AAATTAATGATTTCGACTCATTAGAT,mature-mt_tRNA-Arg-TCG	0.645315	0.873754	1	0	0	2	0	0
AAATTAATGATTTCGACTCATTAGATT,mature-mt_tRNA-Arg-TCG	0.751238	0.564119	1	7	4	15	1	5
AAATTAATGATTTCGACTCATTAGATTA,mature-mt_tRNA-Arg-TCG	-1.36812	0.561826	3	1	1	1	0	1
AAATTAATGATTTCGACTCATTAGATTAT,mature-mt_tRNA-Arg-TCG	3.0919	0.357462	0	0	0	3	2	0
AAATTAATGATTTCGACTCATTAGATTATG,mature-mt_tRNA-Arg-TCG	-0.562214	0.594882	19	6	10	22	1	5
AAATTAATGATTTCGACTCATTAGATTATGA,mature-mt_tRNA-Arg-TCG	-1.13759	0.579526	7	0	3	0	0	4
AAATTAATGATTTCGACTCATTAGATTATGAT,mature-mt_tRNA-Arg-TCG	1.92282	0.529618	0	0	1	2	0	2
AAATTAATGATTTCGACTCATTAGATTATGATG,mature-mt_tRNA-Arg-TCG	-1.04561	0.467871	16	0	8	8	0	5
AAATTAATGATTTCGACTCATTAGATTATGATGA,mature-mt_tRNA-Arg-TCG	-1.746	0.665753	0	0	2	0	0	0
AAATTAATGATTTCGACTCATTAGATTATGATGAT,mature-mt_tRNA-Arg-TCG	-1.96161	0.625864	2	0	0	0	0	0
AAATTAATGATTTCGACTCATTAGATTATGATGATG,mature-mt_tRNA-Arg-TCG	-2.8935	0.406866	3	1	0	0	0	0
AAATTAATGATTTCGACTCATTAGATTATGATGATGT,mature-mt_tRNA-Arg-TCG	-2.71922	0.457784	0	1	3	0	0	0
AAATTAATGATTTCGACTCATTAGATTATGATGATGTT,mature-mt_tRNA-Arg-TCG	-1.26568	0.642785	2	1	1	2	0	0
AAATTAATGATTTCGACTCATTAGATTATGATGATGTTC,mature-mt_tRNA-Arg-TCG	-0.889136	0.827507	1	0	0	0	0	0
AAATTATAGAGGTTC,mature-mt_tRNA-Ile-GAT	2.64002	0.327772	0	1	0	1	5	0
AAATTATAGAGGTTCAAG,mature-mt_tRNA-Ile-GAT	1.00703	0.751097	0	0	2	5	0	0
AAATTATAGAGGTTCAAGCC,mature-mt_tRNA-Ile-GAT	1.03442	0.799879	0	0	0	1	0	0
AAATTATAGAGGTTCAAGCCCT,mature-mt_tRNA-Ile-GAT	-2.32895	0.560157	0	0	3	0	0	0
AAATTATAGAGGTTCAAGCCCTCTT,mature-mt_tRNA-Ile-GAT	-2.29666	0.565807	0	1	2	0	0	0
AAATTATAGAGGTTCAAGCCCTCTTA,mature-mt_tRNA-Ile-GAT	-0.284011	0.918527	0	5	0	0	0	3
AAATTATAGAGGTTCAAGCCCTCTTATTT,mature-mt_tRNA-Ile-GAT	-0.738417	0.851193	0	1	1	1	0	0
AAATTATAGAGGTTCAAGCCCTCTTATTTCT,mature-mt_tRNA-Ile-GAT	-2.5541	0.521517	3	0	0	0	0	0
AAATTATAGAGGTTCAAGCCCTCTTATTTCTACCA,mature-mt_tRNA-Ile-GAT_CCA_end	-0.889136	0.827507	0	1	0	0	0	0
AAATTATAGATCAAT,mature-mt_tRNA-Asp-GTC	0.684168	0.292845	19	26	21	30	32	35
AAATTATAGATCAATA,mature-mt_tRNA-Asp-GTC	0.922557	0.801353	1	0	0	1	0	1
AAATTATAGATCAATAAT,mature-mt_tRNA-Asp-GTC	-1.67461	0.209304	8	6	5	3	1	2
AAATTATAGATCAATAATC,mature-mt_tRNA-Asp-GTC	-0.889136	0.827507	1	0	0	0	0	0
AAATTATAGATCAATAATCT,mature-mt_tRNA-Asp-GTC	0.302269	0.630321	30	27	27	59	27	21
AAATTATAGATCAATAATCTA,mature-mt_tRNA-Asp-GTC	2.09257	0.603263	0	0	0	3	0	0
AAATTATAGATCAATAATCTATA,mature-mt_tRNA-Asp-GTC	1.88453	0.641254	0	0	0	1	0	1
AAATTATAGATCAATAATCTATAT,mature-mt_tRNA-Asp-GTC	0.486412	0.816984	0	5	0	2	2	2
AAATTATAGATCAATAATCTATATA,mature-mt_tRNA-Asp-GTC	-0.981521	0.639978	6	3	0	6	0	0
AAATTATAGATCAATAATCTATATAT,mature-mt_tRNA-Asp-GTC	0.14452	0.88509	7	12	9	3	8	15
AAATTATAGATCAATAATCTATATATC,mature-mt_tRNA-Asp-GTC	3.24497	0.168934	0	1	0	5	0	5
AAATTATAGATCAATAATCTATATATCT,mature-mt_tRNA-Asp-GTC	0.0333638	0.972236	5	10	16	19	3	10
AAATTATAGATCAATAATCTATATATCTT,mature-mt_tRNA-Asp-GTC	-0.212342	0.876017	2	8	4	10	2	1
AAATTATAGATCAATAATCTATATATCTTA,mature-mt_tRNA-Asp-GTC_3_end	-0.889136	0.827507	1	0	0	0	0	0
AAATTATAGATCAATAATCTATATATCTTAC,mature-mt_tRNA-Asp-GTC	3.29378	0.352189	0	0	0	7	0	0
AAATTATAGATCAATAATCTATATATCTTACC,mature-mt_tRNA-Asp-GTC	-0.889136	0.827507	1	0	0	0	0	0
AAATTATAGATCAATAATCTATATATCTTACCA,mature-mt_tRNA-Asp-GTC_CCA_end	-1.4961	0.426164	5	0	6	2	0	2
AAATTATAGGTCAATAATCTATATAT,mature-mt_tRNA-Asp-GTC	-0.889136	0.827507	0	0	1	0	0	0
AAATTCGAAGGTGTAG,mature-mt_tRNA-Cys-GCA	3.27365	0.306367	0	0	0	2	0	3
AAATTCGAAGGTGTAGAG,mature-mt_tRNA-Cys-GCA	-0.116709	0.976281	0	2	0	2	0	0
AAATTCGAAGGTGTAGAGA,mature-mt_tRNA-Cys-GCA	-0.114269	0.938584	9	0	7	12	0	5
AAATTCGAAGGTGTAGAGAA,mature-mt_tRNA-Cys-GCA	3.47437	0.0345509	1	1	0	8	3	10
AAATTCGAAGGTGTAGAGAAA,mature-mt_tRNA-Cys-GCA	2.96052	0.244442	0	0	1	0	6	1
AAATTCGAAGGTGTAGAGAAAT,mature-mt_tRNA-Cys-GCA	1.54556	0.467227	0	2	1	6	3	0
AAATTCGAAGGTGTAGAGAAATC,mature-mt_tRNA-Cys-GCA	-1.96161	0.625864	2	0	0	0	0	0
AAATTCGAAGGTGTAGAGAAATCTCT,mature-mt_tRNA-Cys-GCA	-2.09448	0.337602	6	0	4	3	0	0
AAATTCGAAGGTGTAGAGAAATCTCTAC,mature-mt_tRNA-Cys-GCA	1.03442	0.799879	0	0	0	0	1	0
AAATTCGAAGGTGTAGAGAAATCTCTACT,mature-mt_tRNA-Cys-GCA	0.115299	0.948764	2	5	2	12	0	0
AAATTCGAAGGTGTAGAGAAATCTCTACTA,mature-mt_tRNA-Cys-GCA	0.0726449	0.985796	1	0	0	1	0	0
AAATTCGAAGGTGTAGAGAAATCTCTACTAAG,mature-mt_tRNA-Cys-GCA	3.07206	0.41318	0	0	0	6	0	0
AAATTCGAAGGTGTAGAGAAATCTCTACTAAGA,mature-mt_tRNA-Cys-GCA	-2.42899	0.34164	2	1	3	1	0	0
AAATTCGAAGGTGTAGAGAAATCTCTACTAAGACT,mature-mt_tRNA-Cys-GCA	1.03442	0.799879	0	0	0	1	0	0
AAATTCGAAGGTGTAGAGAAATCTCTACTAAGACTT,mature-mt_tRNA-Cys-GCA_3_end	2.09257	0.603263	0	0	0	3	0	0
AAATTCGAAGGTGTAGAGAAATCTCTACTAAGACTTCC,mature-mt_tRNA-Cys-GCA	0.429398	0.874074	0	0	3	2	2	0
AAATTCGAAGGTGTAGAGAAATCTCTACTAAGACTTCCA,mature-mt_tRNA-Cys-GCA_CCA_end	-2.39152	0.357696	1	1	4	1	0	0
AAATTGCGTAAGACT,mature-mt_tRNA-Leu-TAA	1.03442	0.799879	0	0	0	0	1	0
AAATTGCGTAAGACTT,mature-mt_tRNA-Leu-TAA	-1.96161	0.625864	2	0	0	0	0	0
AAATTGCGTAAGACTTAAAACCTT,mature-mt_tRNA-Leu-TAA	1.03442	0.799879	0	0	0	1	0	0
AAATTGCGTAAGACTTAAAACCTTGTTCC,mature-mt_tRNA-Leu-TAA	-0.889136	0.827507	0	1	0	0	0	0
AAATTGCGTAAGACTTAAAACCTTGTTCCC,mature-mt_tRNA-Leu-TAA	2.17885	0.449352	1	0	0	0	2	2
AAATTTTCGTAGGTT,mature-mt_tRNA-Asn-GTT	1.36066	0.687833	1	0	0	2	1	0
AAATTTTCGTAGGTTT,mature-mt_tRNA-Asn-GTT	2.41976	0.246558	0	2	0	5	2	3
AAATTTTCGTAGGTTTA,mature-mt_tRNA-Asn-GTT	-2.23023	0.577509	0	3	0	0	0	0
AAATTTTCGTAGGTTTAA,mature-mt_tRNA-Asn-GTT	-0.889136	0.827507	0	0	1	0	0	0
AAATTTTCGTAGGTTTAAT,mature-mt_tRNA-Asn-GTT	2.49607	0.532374	0	0	0	4	0	0
AAATTTTCGTAGGTTTAATTC,mature-mt_tRNA-Asn-GTT	-0.889136	0.827507	0	1	0	0	0	0
AAATTTTCGTAGGTTTAATTCC,mature-mt_tRNA-Asn-GTT	-2.23023	0.577509	0	3	0	0	0	0
AACAAAGCAAAGCACT,mature-mt_tRNA-Phe-GAA	-0.889136	0.827507	1	0	0	0	0	0
AACAAAGCAAAGCACTG,mature-mt_tRNA-Phe-GAA	0.555622	0.502063	11	7	13	17	14	13
AACAAAGCAAAGCACTGA,mature-mt_tRNA-Phe-GAA	3.51887	0.0482173	1	1	0	16	9	0
AACAAAGCAAAGCACTGAA,mature-mt_tRNA-Phe-GAA	-1.01928	0.690855	5	0	0	2	1	0
AACAAAGCAAAGCACTGAAAA,mature-mt_tRNA-Phe-GAA	-0.889136	0.827507	1	0	0	0	0	0
AACAAAGCAAAGCACTGAAAATG,mature-mt_tRNA-Phe-GAA	-2.34488	0.55738	1	2	0	0	0	0
AACAAAGCAAAGCACTGAAAATGCTTAG,mature-mt_tRNA-Phe-GAA	1.60709	0.692322	0	0	0	2	0	0
AACAAAGCAAAGCACTGAAAATGCTTAGA,mature-mt_tRNA-Phe-GAA	-2.97151	0.428746	4	0	0	0	0	0
AACAAAGCAAAGCACTGAAAATGCTTAGATGG,mature-mt_tRNA-Phe-GAA	-0.614996	0.829809	0	3	1	3	0	0
AACAAAGCAAAGCACTGAAAATGCTTAGATGGAT,mature-mt_tRNA-Phe-GAA	-1.6517	0.683455	0	2	0	0	0	0
AACAAAGCAAAGCACTGAAAATGCTTAGATGGATA,mature-mt_tRNA-Phe-GAA	-1.5881	0.658081	3	0	0	1	0	0
AACAAAGCAAAGCACTGAAAATGCTTAGATGGATAATT,mature-mt_tRNA-Phe-GAA	-1.85677	0.645151	1	0	1	0	0	0
AACACACAAGTTTAACT,mature-mt_tRNA-Trp-TCA	-0.889136	0.827507	0	0	1	0	0	0
AACACACAAGTTTAACTTCT,mature-mt_tRNA-Trp-TCA	-0.889136	0.827507	0	1	0	0	0	0
AACACACAAGTTTAACTTCTG,mature-mt_tRNA-Trp-TCA_3_end	1.13517	0.769057	1	0	0	3	0	0
AACACACAAGTTTAACTTCTGC,mature-mt_tRNA-Trp-TCA	-0.511609	0.728257	28	1	1	29	1	0
AACACACAAGTTTAACTTCTGCC,mature-mt_tRNA-Trp-TCA	1.60287	0.1084	12	11	1	71	8	8
AACACACAAGTTTAACTTCTGCCA,mature-mt_tRNA-Trp-TCA_CCA_end	0.692302	0.192795	61	52	95	186	80	78
AACACAGAGGTTTAAA,mature-mt_tRNA-Tyr-GTA	-1.96161	0.625864	2	0	0	0	0	0
AACACAGAGGTTTAAATC,mature-mt_tRNA-Tyr-GTA	-1.96161	0.625864	2	0	0	0	0	0
AACACAGAGGTTTAAATCCTCTTTTTACC,mature-mt_tRNA-Tyr-GTA	-0.889136	0.827507	1	0	0	0	0	0
AACACAGAGGTTTAAATCCTCTTTTTACCAC,mature-mt_tRNA-Tyr-GTA	-0.889136	0.827507	0	0	1	0	0	0
AACACAGAGGTTTAAATCCTCTTTTTACCACC,mature-mt_tRNA-Tyr-GTA	-0.271084	0.920253	1	3	0	4	0	0
AACACAGAGGTTTAAATCCTCTTTTTACCACCA,mature-mt_tRNA-Tyr-GTA_CCA_end	-1.14263	0.570138	2	1	6	5	0	0
AACAGGAAATAAACC,mature-mt_tRNA-His-GTG	-0.365825	0.896187	0	5	0	0	3	0
AACAGGAAATAAACCTCC,mature-mt_tRNA-His-GTG	2.18517	0.586649	0	0	0	0	0	2
AACAGGAAATAAACCTCCTT,mature-mt_tRNA-His-GTG	-0.889136	0.827507	0	1	0	0	0	0
AACAGGAAATAAACCTCCTTA,mature-mt_tRNA-His-GTG	-1.746	0.665753	0	0	2	0	0	0
AACAGGAAATAAACCTCCTTATT,mature-mt_tRNA-His-GTG	1.13287	0.774141	0	0	1	3	0	0
AACAGGAAATAAACCTCCTTATTC,mature-mt_tRNA-His-GTG	0.873982	0.818957	0	1	0	1	1	0
AACAGGAAATAAACCTCCTTATTCA,mature-mt_tRNA-His-GTG	2.9893	0.271752	1	0	0	11	0	0
AACAGGAAATAAACCTCCTTATTCAC,mature-mt_tRNA-His-GTG	-1.96161	0.625864	2	0	0	0	0	0
AACAGGAAATAAACCTCCTTATTCACC,mature-mt_tRNA-His-GTG_3_end	1.02159	0.602632	6	0	0	16	0	1
AACAGGAAATAAACCTCCTTATTCACCC,mature-mt_tRNA-His-GTG	0.238984	0.8704	15	0	1	21	3	1
AACAGGAAATAAACCTCCTTATTCACCCC,mature-mt_tRNA-His-GTG	0.578815	0.381261	33	27	29	99	20	27
AACAGGAAATAAACCTCCTTATTCACCCCA,mature-mt_tRNA-His-GTG_CCA_end	-0.272071	0.652118	70	50	89	118	45	24
AACAGGAGATCCTGG,mature-tRNA-Thr-TGT;mature-tRNA-Thr-CGT;mature-tRNA-Thr-AGT	1.03442	0.799879	0	0	0	0	0	1
AACAGGAGATCCTGGG,mature-tRNA-Thr-TGT;mature-tRNA-Thr-CGT;mature-tRNA-Thr-AGT	-1.6517	0.683455	0	2	0	0	0	0
AACAGGAGATCCTGGGTTC,mature-tRNA-Thr-TGT;mature-tRNA-Thr-CGT;mature-tRNA-Thr-AGT	2.09872	0.602152	0	0	0	0	2	0
AACAGGAGATCCTGGGTTCAAATCCCAGCGGGG,mature-tRNA-Thr-AGT	-3.04588	0.364986	0	1	4	0	0	0
AACAGGAGATCCTGGGTTCGAATCCCAGCGGGG,mature-tRNA-Thr-AGT	-0.957507	0.748294	0	5	0	0	2	0
AACAGGAGATCCTGGGTTCGAATCCCAGCGGGGC,mature-tRNA-Thr-AGT	-2.23023	0.577509	0	3	0	0	0	0
AACAGGAGATCCTGGGTTCGAATCCCAGCGGTGCC,mature-tRNA-Thr-AGT	2.09257	0.603263	0	0	0	3	0	0
AACAGGAGATCCTGGGTTCGAATCCCAGCGGTGCCT,mature-tRNA-Thr-AGT_3_end	1.13564	0.771483	0	0	1	0	2	0
AACAGGAGATCCTGGGTTCGAATCCCAGCGGTGCCTCC,mature-tRNA-Thr-AGT	-0.784298	0.845184	0	0	2	0	1	0
AACAGGAGATCCTGGGTTCGAATCCCAGCGGTGCCTCCA,mature-tRNA-Thr-AGT_CCA_end	-1.87117	0.473824	3	0	3	2	0	0
AACAGGAGATCCTGGGTTCGAATCCCAGTGGGG,mature-tRNA-Thr-TGT;mature-tRNA-Thr-CGT	-1.746	0.665753	0	0	2	0	0	0
AACATGGCTTTCTTA,mature-mt_tRNA-Ser-GCT_3_end	1.03442	0.799879	0	0	0	1	0	0
AACATGGCTTTCTTAC,mature-mt_tRNA-Ser-GCT	1.88453	0.641254	0	0	0	1	0	1
AACATGGCTTTCTTACC,mature-mt_tRNA-Ser-GCT	-2.40713	0.309698	3	0	6	2	0	0
AACATGGCTTTCTTACCA,mature-mt_tRNA-Ser-GCT_CCA_end	-1.71898	0.453074	6	0	1	0	1	1
AACATTACTCTGGTCT,mature-mt_tRNA-Thr-TGT	1.03442	0.799879	0	0	0	0	1	0
AACATTACTCTGGTCTT,mature-mt_tRNA-Thr-TGT	1.03442	0.799879	0	0	0	0	0	1
AACATTACTCTGGTCTTG,mature-mt_tRNA-Thr-TGT	2.97385	0.393598	0	0	0	1	3	0
AACATTACTCTGGTCTTGT,mature-mt_tRNA-Thr-TGT	-1.746	0.665753	0	0	2	0	0	0
AACATTACTCTGGTCTTGTA,mature-mt_tRNA-Thr-TGT	-0.889136	0.827507	1	0	0	0	0	0
AACATTACTCTGGTCTTGTAA,mature-mt_tRNA-Thr-TGT	0.272726	0.938726	0	0	2	0	2	0
AACATTACTCTGGTCTTGTAAA,mature-mt_tRNA-Thr-TGT	3.12636	0.35052	0	0	0	0	3	1
AACATTACTCTGGTCTTGTAAAC,mature-mt_tRNA-Thr-TGT	0.693531	0.808305	0	0	3	0	4	0
AACATTACTCTGGTCTTGTAAACC,mature-mt_tRNA-Thr-TGT	-1.8128	0.653302	1	1	0	0	0	0
AACATTACTCTGGTCTTGTAAACCTG,mature-mt_tRNA-Thr-TGT	2.15792	0.458638	1	0	0	0	3	1
AACATTACTCTGGTCTTGTAAACCTGA,mature-mt_tRNA-Thr-TGT	-0.0894532	0.961129	3	3	1	1	5	0
AACATTACTCTGGTCTTGTAAACCTGAA,mature-mt_tRNA-Thr-TGT	-0.889136	0.827507	0	1	0	0	0	0
AACATTACTCTGGTCTTGTAAACCTGAAA,mature-mt_tRNA-Thr-TGT	2.86598	0.260455	0	0	1	7	2	0
AACATTACTCTGGTCTTGTAAACCTGAAAT,mature-mt_tRNA-Thr-TGT	0.617763	0.779993	0	0	5	2	5	0
AACATTACTCTGGTCTTGTAAACCTGAAATG,mature-mt_tRNA-Thr-TGT	-0.565486	0.814	0	0	6	2	2	0
AACATTACTCTGGTCTTGTAAACCTGAAATGAA,mature-mt_tRNA-Thr-TGT	-1.96161	0.625864	2	0	0	0	0	0
AACATTACTCTGGTCTTGTAAACCTGAAATGAAG,mature-mt_tRNA-Thr-TGT	1.03442	0.799879	0	0	0	1	0	0
AACATTACTCTGGTCTTGTAAACCTGAAATGAAGA,mature-mt_tRNA-Thr-TGT	-2.66912	0.472238	0	3	1	0	0	0
AACATTACTCTGGTCTTGTAAACCTGAAATGAAGAT,mature-mt_tRNA-Thr-TGT	-2.06746	0.47281	0	2	3	0	0	1
AACATTACTCTGGTCTTGTAAACCTGAAATGAAGATCT,mature-mt_tRNA-Thr-TGT	1.17335	0.743837	0	1	0	0	1	1
AACATTACTCTGGTCTTGTAAACCTGAAATGAAGATCTT,mature-mt_tRNA-Thr-TGT	-0.979073	0.587676	2	3	4	4	0	1
AACATTACTCTGGTCTTGTAAACCTGAAATGAAGATCTTC,mature-mt_tRNA-Thr-TGT	-0.853022	0.7882	1	0	2	2	0	0
AACATTACTCTGGTCTTGTAAACCTGAAATGAAGATCTTCT,mature-mt_tRNA-Thr-TGT	1.03442	0.799879	0	0	0	0	0	1
AACATTAGACTGTGA,mature-mt_tRNA-His-GTG	-3.22527	0.360597	0	6	0	0	0	0
AACATTAGACTGTGAA,mature-mt_tRNA-His-GTG	2.09257	0.603263	0	0	0	3	0	0
AACATTAGACTGTGAAT,mature-mt_tRNA-His-GTG	1.03442	0.799879	0	0	0	0	0	1
AACATTAGACTGTGAATC,mature-mt_tRNA-His-GTG	0.0333865	0.983752	2	1	4	3	2	2
AACATTAGACTGTGAATCT,mature-mt_tRNA-His-GTG	0.15813	0.893048	3	5	7	10	3	4
AACATTAGACTGTGAATCTG,mature-mt_tRNA-His-GTG	1.89825	0.509362	0	1	0	2	1	1
AACATTAGACTGTGAATCTGA,mature-mt_tRNA-His-GTG	-0.889136	0.827507	0	1	0	0	0	0
AACATTAGACTGTGAATCTGAC,mature-mt_tRNA-His-GTG	4.81473	0.0180754	0	0	0	9	4	3
AACATTAGACTGTGAATCTGACA,mature-mt_tRNA-His-GTG	-1.7287	0.329657	4	8	2	5	0	0
AACATTAGACTGTGAATCTGACAA,mature-mt_tRNA-His-GTG	0.374946	0.91731	0	2	0	3	0	0
AACATTAGACTGTGAATCTGACAAC,mature-mt_tRNA-His-GTG	-1.38839	0.503332	5	1	1	2	0	1
AACATTAGACTGTGAATCTGACAACA,mature-mt_tRNA-His-GTG	-1.96161	0.625864	2	0	0	0	0	0
AACATTAGACTGTGAATCTGACAACAG,mature-mt_tRNA-His-GTG	0.301926	0.906229	1	2	0	3	0	1
AACATTAGACTGTGAATCTGACAACAGG,mature-mt_tRNA-His-GTG	0.282092	0.728382	14	16	11	29	6	16
AACATTAGACTGTGAATCTGACAACAGGA,mature-mt_tRNA-His-GTG	0.857512	0.18496	27	22	16	51	26	39
AACATTAGACTGTGAATCTGACAACAGGAA,mature-mt_tRNA-His-GTG	0.301153	0.628632	27	32	26	49	21	33
AACATTAGACTGTGAATCTGACAACAGGAAA,mature-mt_tRNA-His-GTG	-0.103709	0.877829	52	38	35	91	15	24
AACATTAGACTGTGAATCTGACAACAGGAAAT,mature-mt_tRNA-His-GTG	0.0395905	0.944722	89	56	63	122	38	63
AACATTAGACTGTGAATCTGACAACAGGAAATA,mature-mt_tRNA-His-GTG	-0.247555	0.673949	81	57	69	118	29	41
AACATTAGACTGTGAATCTGACAACAGGAAATAA,mature-mt_tRNA-His-GTG	-2.97942	0.0928426	2	7	10	0	0	2
AACATTAGACTGTGAATCTGACAACAGGAAATAAA,mature-mt_tRNA-His-GTG	-1.96973	0.274371	5	4	4	4	0	0
AACATTAGACTGTGAATCTGACAACAGGAAATAAAC,mature-mt_tRNA-His-GTG	-1.04327	0.503617	5	2	7	7	0	1
AACATTAGACTGTGAATCTGACAACAGGAAATAAACC,mature-mt_tRNA-His-GTG	-1.77122	0.577079	1	3	0	1	0	0
AACATTAGACTGTGAATCTGACAACAGGAAATAAACCT,mature-mt_tRNA-His-GTG	0.0726449	0.985796	0	1	0	0	0	1
AACATTAGACTGTGAATCTGACAACAGGAAATAAACCTC,mature-mt_tRNA-His-GTG	-1.96161	0.625864	2	0	0	0	0	0
AACATTAGACTGTGAATCTGACAACAGGAAATAAACCTCC,mature-mt_tRNA-His-GTG	-1.8128	0.653302	1	1	0	0	0	0
AACATTAGACTGTGAATCTGACAACAGGAAATAAACCTCCT,mature-mt_tRNA-His-GTG	-0.889136	0.827507	0	1	0	0	0	0
AACCAAAAACCTTGG,mature-mt_tRNA-Leu-TAG	1.2207	0.752369	0	1	0	0	0	2
AACCAAAAACCTTGGT,mature-mt_tRNA-Leu-TAG	1.03442	0.799879	0	0	0	1	0	0
AACCAAAAACCTTGGTG,mature-mt_tRNA-Leu-TAG	1.03442	0.799879	0	0	0	0	0	1
AACCAAAAACCTTGGTGC,mature-mt_tRNA-Leu-TAG	2.69004	0.499796	0	0	0	0	3	0
AACCAAAAACCTTGGTGCA,mature-mt_tRNA-Leu-TAG	-2.32895	0.560157	0	0	3	0	0	0
AACCAAAAACCTTGGTGCAAATCCA,mature-mt_tRNA-Leu-TAG	0.0545773	0.984634	1	0	2	4	0	0
AACCAAAAACCTTGGTGCAAATCCAA,mature-mt_tRNA-Leu-TAG	-0.140538	0.958198	1	0	2	2	1	0
AACCAAAAACCTTGGTGCAAATCCAAA,mature-mt_tRNA-Leu-TAG	-0.495755	0.67198	5	8	6	9	2	3
AACCAAAAACCTTGGTGCAAATCCAAAT,mature-mt_tRNA-Leu-TAG	1.05542	0.485174	5	1	1	15	1	2
AACCAAAAACCTTGGTGCAAATCCAAATA,mature-mt_tRNA-Leu-TAG	1.49473	0.490482	1	2	0	9	0	1
AACCAAAAACCTTGGTGCAAATCCAAATAA,mature-mt_tRNA-Leu-TAG	-1.77167	0.563207	1	3	0	0	0	1
AACCAAAAACCTTGGTGCAAATCCAAATAAA,mature-mt_tRNA-Leu-TAG	-0.889136	0.827507	0	0	1	0	0	0
AACCAAAAACCTTGGTGCAAATCCAAATAAAA,mature-mt_tRNA-Leu-TAG	-1.95161	0.449932	0	2	5	2	0	0
AACCAAAAACCTTGGTGCAAATCCAAATAAAAG,mature-mt_tRNA-Leu-TAG	-1.99087	0.480598	6	0	0	2	0	0
AACCAAAAACCTTGGTGCAAATCCAAATAAAAGT,mature-mt_tRNA-Leu-TAG	0.234851	0.942483	1	1	0	3	0	0
AACCAAAAACCTTGGTGCAAATCCAAATAAAAGTA,mature-mt_tRNA-Leu-TAG_3_end	0.645315	0.873754	0	1	0	2	0	0
AACCAAAAACCTTGGTGCAAATCCAAATAAAAGTAC,mature-mt_tRNA-Leu-TAG	0.0726449	0.985796	0	0	1	1	0	0
AACCAAAAACCTTGGTGCAAATCCAAATAAAAGTACC,mature-mt_tRNA-Leu-TAG	-1.09305	0.619492	6	2	0	5	0	0
AACCAAAAACCTTGGTGCAAATCCAAATAAAAGTACCA,mature-mt_tRNA-Leu-TAG_CCA_end	-2.2885	0.088787	9	3	18	6	0	1
AACCAGGGGTCGCGA,mature-tRNA-Thr-TGT	-1.69942	0.674478	0	1	1	0	0	0
AACCAGGGGTCGCGAG,mature-tRNA-Thr-TGT	-0.889136	0.827507	0	1	0	0	0	0
AACCAGGGGTCGCGAGT,mature-tRNA-Thr-TGT	-3.00612	0.372592	0	3	2	0	0	0
AACCAGGGGTCGCGAGTT,mature-tRNA-Thr-TGT	3.03981	0.261671	0	0	1	0	0	7
AACCAGGGGTCGCGAGTTCAAA,mature-tRNA-Thr-TGT	3.19653	0.37532	0	0	0	0	0	4
AACCAGGGGTCGCGAGTTCAAATC,mature-tRNA-Thr-TGT	2.78009	0.485032	0	0	0	0	0	3
AACCAGGGGTCGCGAGTTCAAATCTCGCTGGGG,mature-tRNA-Thr-TGT	0.178502	0.93581	0	5	0	2	2	1
AACCATCCTCTGCTAC,mature-tRNA-iMet-CAT	-0.889136	0.827507	0	1	0	0	0	0
AACCATCCTCTGCTACC,mature-tRNA-iMet-CAT	0.65583	0.638603	0	7	5	12	6	1
AACCATCCTCTGCTACCA,mature-tRNA-iMet-CAT_CCA_end	0.751236	0.490784	0	10	15	10	8	18
AACCCAGAAGAGAGT,mature-mt_tRNA-Gly-TCC	-0.889136	0.827507	0	0	1	0	0	0
AACCCAGAAGAGAGTA,mature-mt_tRNA-Gly-TCC_3_end	-1.77681	0.492615	6	0	0	1	1	0
AACCCAGAAGAGAGTAC,mature-mt_tRNA-Gly-TCC	0.273885	0.890789	1	0	5	6	0	2
AACCCAGAAGAGAGTACC,mature-mt_tRNA-Gly-TCC	0.247004	0.746297	25	13	12	32	19	11
AACCCAGAAGAGAGTACCA,mature-mt_tRNA-Gly-TCC_CCA_end	0.378469	0.451099	108	97	136	162	165	98
AACCCAGAGGTCGAT,mature-tRNA-iMet-CAT	1.03442	0.799879	0	0	0	1	0	0
AACCCAGAGGTCGATGG,mature-tRNA-iMet-CAT	-0.889136	0.827507	0	0	1	0	0	0
AACCCAGAGGTCGATGGATCGAAACCATCCTCTGCTACCA,mature-tRNA-iMet-CAT_CCA_end	0.645315	0.873754	0	0	1	2	0	0
AACCCCGTCCGTGCCTCCA,mature-tRNA-Thr-CGT_CCA_end	-1.746	0.665753	0	0	2	0	0	0
AACCGAAAGGTTGGTGGTTCGAGC,mature-tRNA-Asn-GTT	-0.889136	0.827507	0	0	1	0	0	0
AACCGAAAGGTTGGTGGTTCGAGCCCACCCAGGGACGCC,mature-tRNA-Asn-GTT	-0.889136	0.827507	0	0	1	0	0	0
AACCGAAAGGTTGGTGGTTCGAGCCCACCCAGGGACGCCA,mature-tRNA-Asn-GTT_CCA_end	-0.889136	0.827507	0	1	0	0	0	0
AACCGAAGATCACGGGTTCG,mature-tRNA-Thr-CGT	3.10662	0.400582	0	0	0	0	4	0
AACCGAAGATCACGGGTTCGAACCCCGTCCGTG,mature-tRNA-Thr-CGT	0.0726449	0.985796	0	0	1	0	0	1
AACCGAAGATCACGGGTTCGAACCCCGTCCGTGCCTCCA,mature-tRNA-Thr-CGT_CCA_end	0.0726449	0.985796	0	1	0	1	0	0
AACCGAAGATCGCGGGTTCGAACCCCGTC,mature-tRNA-Thr-CGT	-0.784298	0.845184	0	0	2	0	1	0
AACCGAAGATCGCGGGTTCGAACCCCGTCCGTGCCTCCA,mature-tRNA-Thr-CGT_CCA_end	-0.689922	0.864759	0	2	0	0	1	0
AACCGGGCGGAAACA,mature-tRNA-Val-CAC_3_end;mature-tRNA-Val-AAC_3_end;mature-tRNA-Gly-ACC_3_end	-0.803974	0.702514	3	3	1	5	0	0
AACCGGGCGGAAACAC,mature-tRNA-Val-CAC;mature-tRNA-Val-AAC;mature-tRNA-Gly-ACC	-3.12116	0.0361676	11	10	4	2	0	1
AACCGGGCGGAAACACC,mature-tRNA-Val-CAC;mature-tRNA-Val-AAC;mature-tRNA-Gly-ACC	-0.534526	0.449216	22	82	27	26	39	16
AACCGGGCGGAAACACCA,mature-tRNA-Val-CAC_CCA_end;mature-tRNA-Val-AAC_CCA_end;mature-tRNA-Gly-ACC_CCA_end	0.182085	0.779863	14	41	43	36	30	35
AACCGGGCGGGAACACC,mature-tRNA-Val-CAC;mature-tRNA-Val-AAC	-0.889136	0.827507	1	0	0	0	0	0
AACCGGGCGGGAACACCA,mature-tRNA-Val-CAC_CCA_end;mature-tRNA-Val-AAC_CCA_end	-0.889136	0.827507	1	0	0	0	0	0
AACCTCAGAGGGGGCACCA,mature-tRNA-Met-CAT_CCA_end	1.03442	0.799879	0	0	0	0	0	1
AACCTCCTTATTCACC,mature-mt_tRNA-His-GTG_3_end	1.80887	0.592055	1	0	0	0	0	3
AACCTCCTTATTCACCC,mature-mt_tRNA-His-GTG	0.987907	0.441912	7	1	2	16	3	4
AACCTCCTTATTCACCCC,mature-mt_tRNA-His-GTG	0.00499678	0.992961	54	40	49	71	38	36
AACCTCCTTATTCACCCCA,mature-mt_tRNA-His-GTG_CCA_end	0.151371	0.761818	99	91	157	175	113	92
AACCTCGGTTCGAATCCGAGTCACG,mature-tRNA-His-GTG	-0.13399	0.959768	1	3	0	0	3	0
AACCTCGGTTCGAATCCGAGTCACGG,mature-tRNA-His-GTG	1.48662	0.593816	2	0	0	8	0	0
AACCTCGGTTCGAATCCGAGTCACGGC,mature-tRNA-His-GTG	-0.784214	0.846156	0	0	2	1	0	0
AACCTCGGTTCGAATCCGAGTCACGGCA,mature-tRNA-His-GTG_3_end	1.53508	0.515474	2	0	0	5	1	1
AACCTCGGTTCGAATCCGAGTCACGGCAC,mature-tRNA-His-GTG	1.03442	0.799879	0	0	0	0	0	1
AACCTCGGTTCGAATCCGAGTCACGGCACC,mature-tRNA-His-GTG	1.65163	0.264873	1	5	1	1	15	2
AACCTCGGTTCGAATCCGAGTCACGGCACCA,mature-tRNA-His-GTG_CCA_end	-1.69942	0.674478	0	1	1	0	0	0
AACCTGAAATGAAGATC,mature-mt_tRNA-Thr-TGT	1.03442	0.799879	0	0	0	1	0	0
AACCTGAAATGAAGATCT,mature-mt_tRNA-Thr-TGT	2.34224	0.449712	0	0	1	7	0	0
AACCTGAAATGAAGATCTT,mature-mt_tRNA-Thr-TGT	-0.253492	0.904645	0	3	3	3	2	0
AACCTGAAATGAAGATCTTC,mature-mt_tRNA-Thr-TGT	-0.436063	0.810594	9	4	0	13	0	0
AACCTGAAATGAAGATCTTCT,mature-mt_tRNA-Thr-TGT	1.0584	0.542106	2	0	3	9	2	1
AACCTGAAATGAAGATCTTCTC,mature-mt_tRNA-Thr-TGT	-1.7603	0.568563	0	1	3	0	1	0
AACCTGAAATGAAGATCTTCTCT,mature-mt_tRNA-Thr-TGT	-1.09112	0.611461	2	2	3	4	0	0
AACCTGAAATGAAGATCTTCTCTT,mature-mt_tRNA-Thr-TGT	4.18343	0.143699	0	0	0	13	0	0
AACCTGAAATGAAGATCTTCTCTTCT,mature-mt_tRNA-Thr-TGT	3.76195	0.185783	0	0	0	2	5	0
AACCTGAAATGAAGATCTTCTCTTCTC,mature-mt_tRNA-Thr-TGT	3.76195	0.185783	0	0	0	2	5	0
AACCTGAAATGAAGATCTTCTCTTCTCAA,mature-mt_tRNA-Thr-TGT	1.03442	0.799879	0	0	0	1	0	0
AACCTGAAATGAAGATCTTCTCTTCTCAAG,mature-mt_tRNA-Thr-TGT	-1.26403	0.589588	2	3	1	3	0	0
AACCTGAAATGAAGATCTTCTCTTCTCAAGA,mature-mt_tRNA-Thr-TGT	0.0726449	0.985796	1	0	0	0	1	0
AACCTGAAATGAAGATCTTCTCTTCTCAAGAC,mature-mt_tRNA-Thr-TGT	1.60709	0.692322	0	0	0	2	0	0
AACCTGAAATGAAGATCTTCTCTTCTCAAGACA,mature-mt_tRNA-Thr-TGT_3_end	-0.112521	0.946362	5	0	4	8	1	1
AACCTGAAATGAAGATCTTCTCTTCTCAAGACACC,mature-mt_tRNA-Thr-TGT	0.63254	0.687624	5	2	2	17	1	0
AACCTGAAATGAAGATCTTCTCTTCTCAAGACACCA,mature-mt_tRNA-Thr-TGT_CCA_end	-0.570599	0.466801	28	15	25	33	6	11
AACCTGTAGCTGTTTAGCGACAGAGTGGTT,mature-tRNA-SeC-TCA	2.18517	0.586649	0	0	0	0	0	2
AACCTTGGTGCAAATCC,mature-mt_tRNA-Leu-TAG	-0.229792	0.923596	3	1	0	3	0	1
AACCTTGGTGCAAATCCAAATAAAAGTA,mature-mt_tRNA-Leu-TAG_3_end	-1.5881	0.658081	3	0	0	1	0	0
AACCTTGGTGCAAATCCAAATAAAAGTAC,mature-mt_tRNA-Leu-TAG	-2.5541	0.521517	3	0	0	0	0	0
AACCTTGGTGCAAATCCAAATAAAAGTACC,mature-mt_tRNA-Leu-TAG	-0.325444	0.845932	8	1	4	14	0	0
AACCTTGGTGCAAATCCAAATAAAAGTACCA,mature-mt_tRNA-Leu-TAG_CCA_end	-0.518106	0.420922	75	55	97	124	18	34
AACCTTGTTCCCAGA,mature-mt_tRNA-Leu-TAA	0.0726449	0.985796	1	0	0	0	1	0
AACCTTGTTCCCAGAGGTTCAAATCCTCT,mature-mt_tRNA-Leu-TAA	-0.889136	0.827507	1	0	0	0	0	0
AACCTTGTTCCCAGAGGTTCAAATCCTCTC,mature-mt_tRNA-Leu-TAA	-3.16881	0.326301	3	2	0	0	0	0
AACCTTGTTCCCAGAGGTTCAAATCCTCTCC,mature-mt_tRNA-Leu-TAA	2.18517	0.586649	0	0	0	0	0	2
AACCTTGTTCCCAGAGGTTCAAATCCTCTCCCTA,mature-mt_tRNA-Leu-TAA	-0.889136	0.827507	0	0	1	0	0	0
AACCTTGTTCCCAGAGGTTCAAATCCTCTCCCTAATA,mature-mt_tRNA-Leu-TAA_3_end	-0.889136	0.827507	1	0	0	0	0	0
AACCTTGTTCCCAGAGGTTCAAATCCTCTCCCTAATAC,mature-mt_tRNA-Leu-TAA	-0.348571	0.906906	1	0	2	3	0	0
AACCTTGTTCCCAGAGGTTCAAATCCTCTCCCTAATACC,mature-mt_tRNA-Leu-TAA	-0.932552	0.676719	3	1	2	4	0	0
AACCTTGTTCCCAGAGGTTCAAATCCTCTCCCTAATACCA,mature-mt_tRNA-Leu-TAA_CCA_end	-0.74392	0.664254	3	2	3	3	1	1
AACCTTTTAAGTTAAAGTT,mature-mt_tRNA-Lys-TTT	1.0942	0.105756	12	43	41	37	80	58
AACCTTTTAAGTTAAAGTTAG,mature-mt_tRNA-Lys-TTT	-1.746	0.665753	0	0	2	0	0	0
AACCTTTTAAGTTAAAGTTAGAGA,mature-mt_tRNA-Lys-TTT	1.03442	0.799879	0	0	0	0	1	0
AACCTTTTAAGTTAAAGTTAGAGACC,mature-mt_tRNA-Lys-TTT	1.60709	0.692322	0	0	0	2	0	0
AACCTTTTAAGTTAAAGTTAGAGACCT,mature-mt_tRNA-Lys-TTT	3.10662	0.400582	0	0	0	0	4	0
AACCTTTTAAGTTAAAGTTAGAGACCTT,mature-mt_tRNA-Lys-TTT	-0.889136	0.827507	1	0	0	0	0	0
AACGATGATTTTTCATG,mature-mt_tRNA-Glu-TTC	-0.889136	0.827507	0	1	0	0	0	0
AACGATGATTTTTCATGTC,mature-mt_tRNA-Glu-TTC	0.136042	0.944693	3	3	0	4	3	0
AACGATGATTTTTCATGTCATTGGTCG,mature-mt_tRNA-Glu-TTC	1.03442	0.799879	0	0	0	0	1	0
AACGATGATTTTTCATGTCATTGGTCGC,mature-mt_tRNA-Glu-TTC	-1.05694	0.431451	8	3	5	4	3	1
AACGATGATTTTTCATGTCATTGGTCGCA,mature-mt_tRNA-Glu-TTC	0.838765	0.759579	1	1	0	3	0	1
AACGATGATTTTTCATGTCATTGGTCGCAG,mature-mt_tRNA-Glu-TTC	-0.575981	0.815111	0	5	1	0	0	3
AACGATGATTTTTCATGTCATTGGTCGCAGT,mature-mt_tRNA-Glu-TTC	0.337974	0.756473	4	10	6	4	14	4
AACGATGATTTTTCATGTCATTGGTCGCAGTT,mature-mt_tRNA-Glu-TTC	-2.1094	0.177699	9	6	2	2	0	2
AACGATGATTTTTCATGTCATTGGTCGCAGTTG,mature-mt_tRNA-Glu-TTC	-0.370128	0.860103	3	2	0	2	1	1
AACGATGATTTTTCATGTCATTGGTCGCAGTTGA,mature-mt_tRNA-Glu-TTC	-3.29396	0.340691	5	0	0	0	0	0
AACGATGATTTTTCATGTCATTGGTCGCAGTTGAATG,mature-mt_tRNA-Glu-TTC	-2.4072	0.5454	1	0	2	0	0	0
AACGCCAAGGTCGCGGGTTCGATCCCCGTA,mature-tRNA-Ile-AAT	1.03442	0.799879	0	0	0	1	0	0
AACGCCAAGGTCGCGGGTTCGATCCCCGTACGGG,mature-tRNA-Ile-AAT	-1.6517	0.683455	0	2	0	0	0	0
AACGCGTCTGACTACGGAT,mature-tRNA-Arg-ACG	1.03442	0.799879	0	0	0	0	0	1
AACGCGTCTGACTACGGATCAGAAGATTCTAGGTTCGACT,mature-tRNA-Arg-ACG	-0.889136	0.827507	0	1	0	0	0	0
AACGTTGGTTTAAATC,mature-mt_tRNA-Met-CAT	1.03442	0.799879	0	0	0	1	0	0
AACGTTGGTTTAAATCCTT,mature-mt_tRNA-Met-CAT	1.03442	0.799879	0	0	0	0	0	1
AACGTTGGTTTAAATCCTTCCCG,mature-mt_tRNA-Met-CAT	1.03442	0.799879	0	0	0	1	0	0
AACGTTGGTTTAAATCCTTCCCGT,mature-mt_tRNA-Met-CAT	0.14787	0.965323	2	0	0	0	0	2
AACGTTGGTTTAAATCCTTCCCGTA,mature-mt_tRNA-Met-CAT	1.54287	0.671613	0	0	1	4	0	0
AACGTTGGTTTAAATCCTTCCCGTACT,mature-mt_tRNA-Met-CAT	0.779574	0.757798	2	0	1	7	0	0
AACGTTGGTTTAAATCCTTCCCGTACTA,mature-mt_tRNA-Met-CAT_3_end	0.0726449	0.985796	1	0	0	1	0	0
AACGTTGGTTTAAATCCTTCCCGTACTAC,mature-mt_tRNA-Met-CAT	2.09257	0.603263	0	0	0	3	0	0
AACGTTGGTTTAAATCCTTCCCGTACTACC,mature-mt_tRNA-Met-CAT	-0.796701	0.61732	10	6	0	9	0	2
AACGTTGGTTTAAATCCTTCCCGTACTACCA,mature-mt_tRNA-Met-CAT_CCA_end	-0.257322	0.757416	17	12	11	14	9	10
AACTAAATTTTCGTA,mature-mt_tRNA-Asn-GTT	3.51926	0.29003	0	0	0	0	0	5
AACTAAATTTTCGTAGG,mature-mt_tRNA-Asn-GTT	1.03442	0.799879	0	0	0	0	0	1
AACTAAATTTTCGTAGGTT,mature-mt_tRNA-Asn-GTT	-0.86071	0.557257	11	0	10	6	0	6
AACTAAATTTTCGTAGGTTT,mature-mt_tRNA-Asn-GTT	-0.0597123	0.954278	14	5	4	8	8	6
AACTAAATTTTCGTAGGTTTA,mature-mt_tRNA-Asn-GTT	-0.889136	0.827507	0	1	0	0	0	0
AACTGACTTCCAATT,mature-mt_tRNA-Gly-TCC	1.03442	0.799879	0	0	0	0	1	0
AACTGACTTCCAATTAGTAG,mature-mt_tRNA-Gly-TCC	-1.33849	0.688307	0	1	2	0	1	0
AACTGACTTCCAATTAGTAGA,mature-mt_tRNA-Gly-TCC	0.428977	0.885517	0	0	3	5	0	0
AACTGACTTCCAATTAGTAGAT,mature-mt_tRNA-Gly-TCC	1.03442	0.799879	0	0	0	1	0	0
AACTGACTTCCAATTAGTAGATT,mature-mt_tRNA-Gly-TCC	2.09257	0.603263	0	0	0	3	0	0
AACTGACTTCCAATTAGTAGATTC,mature-mt_tRNA-Gly-TCC	3.9043	0.153768	0	0	0	3	5	0
AACTGACTTCCAATTAGTAGATTCT,mature-mt_tRNA-Gly-TCC	1.54999	0.639871	0	0	1	1	2	0
AACTGACTTCCAATTAGTAGATTCTG,mature-mt_tRNA-Gly-TCC	0.73603	0.595071	4	7	1	14	0	7
AACTGACTTCCAATTAGTAGATTCTGA,mature-mt_tRNA-Gly-TCC	0.445521	0.628681	9	10	5	14	10	8
AACTGACTTCCAATTAGTAGATTCTGAA,mature-mt_tRNA-Gly-TCC	1.05614	0.323067	3	4	6	11	9	6
AACTGACTTCCAATTAGTAGATTCTGAAT,mature-mt_tRNA-Gly-TCC	0.374662	0.602072	34	13	23	42	37	14
AACTGACTTCCAATTAGTAGATTCTGAATA,mature-mt_tRNA-Gly-TCC	0.415293	0.525176	24	20	30	39	38	19
AACTGACTTCCAATTAGTAGATTCTGAATAA,mature-mt_tRNA-Gly-TCC	-0.947157	0.440935	7	7	5	2	4	3
AACTGACTTCCAATTAGTAGATTCTGAATAAA,mature-mt_tRNA-Gly-TCC	-2.05574	0.258584	3	2	9	4	0	0
AACTGACTTCCAATTAGTAGATTCTGAATAAAC,mature-mt_tRNA-Gly-TCC	0.0815886	0.932538	6	10	9	16	5	6
AACTGACTTCCAATTAGTAGATTCTGAATAAACC,mature-mt_tRNA-Gly-TCC	0.72817	0.626689	3	1	3	6	5	1
AACTGACTTCCAATTAGTAGATTCTGAATAAACCC,mature-mt_tRNA-Gly-TCC	-0.116288	0.907736	9	5	10	7	6	8
AACTGACTTCCAATTAGTAGATTCTGAATAAACCCA,mature-mt_tRNA-Gly-TCC	-2.32895	0.560157	0	0	3	0	0	0
AACTGACTTCCAATTAGTAGATTCTGAATAAACCCAGA,mature-mt_tRNA-Gly-TCC	-1.746	0.665753	0	0	2	0	0	0
AACTGCTAATTCATG,mature-mt_tRNA-Ser-GCT	-2.97151	0.428746	4	0	0	0	0	0
AACTGCTAATTCATGCTTCCATGTT,mature-mt_tRNA-Ser-GCT	0.0726449	0.985796	0	1	0	1	0	0
AACTGCTAATTCATGCTTCCATGTTTAA,mature-mt_tRNA-Ser-GCT	-1.96161	0.625864	2	0	0	0	0	0
AACTTTGTCAAAGTTAAATTATAGAT,mature-mt_tRNA-Asp-GTC	-2.32895	0.560157	0	0	3	0	0	0
AACTTTGTCAAAGTTAAATTATAGATC,mature-mt_tRNA-Asp-GTC	0.229071	0.930966	3	0	0	2	2	0
AACTTTGTCAAAGTTAAATTATAGATCA,mature-mt_tRNA-Asp-GTC	-0.889136	0.827507	1	0	0	0	0	0
AACTTTGTCAAAGTTAAATTATAGATCAAT,mature-mt_tRNA-Asp-GTC	0.270211	0.910554	0	0	6	9	0	0
AACTTTGTCAAAGTTAAATTATAGATCAATA,mature-mt_tRNA-Asp-GTC	-2.32895	0.560157	0	0	3	0	0	0
AACTTTGTCAAAGTTAAATTATAGATCAATAATCTATATA,mature-mt_tRNA-Asp-GTC	1.03442	0.799879	0	0	0	1	0	0
AAGAAAACACACAAG,mature-mt_tRNA-Trp-TCA	-0.889136	0.827507	1	0	0	0	0	0
AAGAAAACACACAAGT,mature-mt_tRNA-Trp-TCA	-0.793552	0.55838	2	5	8	3	2	3
AAGAAAACACACAAGTT,mature-mt_tRNA-Trp-TCA	0.164349	0.873171	1	18	14	6	16	9
AAGAAAACACACAAGTTT,mature-mt_tRNA-Trp-TCA	0.198246	0.83823	1	53	18	11	40	16
AAGAAAACACACAAGTTTA,mature-mt_tRNA-Trp-TCA	0.869134	0.624511	0	4	2	1	7	1
AAGAAAACACACAAGTTTAA,mature-mt_tRNA-Trp-TCA	1.42943	0.551312	0	3	0	8	1	0
AAGAAAACACACAAGTTTAAC,mature-mt_tRNA-Trp-TCA	-0.350446	0.849822	6	0	1	3	1	2
AAGAAAACACACAAGTTTAACT,mature-mt_tRNA-Trp-TCA	-0.304513	0.87823	5	2	0	6	0	1
AAGAAAACACACAAGTTTAACTT,mature-mt_tRNA-Trp-TCA	-0.410134	0.816805	2	4	1	2	2	1
AAGAAAACACACAAGTTTAACTTC,mature-mt_tRNA-Trp-TCA	0.994101	0.722571	0	3	0	7	0	0
AAGAAAACACACAAGTTTAACTTCT,mature-mt_tRNA-Trp-TCA	-1.8128	0.653302	1	1	0	0	0	0
AAGAAAACACACAAGTTTAACTTCTG,mature-mt_tRNA-Trp-TCA_3_end	0.963841	0.553579	6	1	1	20	1	0
AAGAAAACACACAAGTTTAACTTCTGC,mature-mt_tRNA-Trp-TCA	0.984103	0.301697	19	9	8	77	8	4
AAGAAAACACACAAGTTTAACTTCTGCC,mature-mt_tRNA-Trp-TCA	0.845801	0.388602	16	6	6	47	3	10
AAGAAAACACACAAGTTTAACTTCTGCCA,mature-mt_tRNA-Trp-TCA_CCA_end	0.223628	0.671676	72	74	98	170	57	68
AAGAAAGATTGCAAG,mature-mt_tRNA-Ser-GCT_5_end	-0.0188323	0.971521	2125	864	1178	2332	1141	912
AAGAAAGATTGCAAGA,mature-mt_tRNA-Ser-GCT_5_end	0.0574664	0.919923	6319	2136	3034	8195	2760	2419
AAGAAAGATTGCAAGAA,mature-mt_tRNA-Ser-GCT_5_end	0.0727325	0.900557	4059	1350	2037	5679	1662	1533
AAGAAAGATTGCAAGAAC,mature-mt_tRNA-Ser-GCT_5_end	0.16987	0.741433	16789	7634	9604	21961	10851	8003
AAGAAAGATTGCAAGAACT,mature-mt_tRNA-Ser-GCT_5_end	0.127276	0.827176	53105	20712	22663	79148	21142	20065
AAGAAAGATTGCAAGAACTG,mature-mt_tRNA-Ser-GCT_5_end	0.0915365	0.876379	65655	22096	29593	92705	25500	24471
AAGAAAGATTGCAAGAACTGC,mature-mt_tRNA-Ser-GCT_5_end	0.344498	0.53786	51524	23427	27246	96405	26750	23712
AAGAAAGATTGCAAGAACTGCT,mature-mt_tRNA-Ser-GCT_5_end	0.529553	0.387243	91330	32336	40338	195491	41562	40635
AAGAAAGATTGCAAGAACTGCTA,mature-mt_tRNA-Ser-GCT_5_end	0.408371	0.519812	25312	8658	11619	53221	8966	10020
AAGAAAGATTGCAAGAACTGCTAA,mature-mt_tRNA-Ser-GCT_5_end	0.328977	0.626307	5849	1725	2242	11631	1757	1723
AAGAAAGATTGCAAGAACTGCTAAT,mature-mt_tRNA-Ser-GCT_5_end	0.231965	0.699258	11803	4142	6081	20808	4954	4316
AAGAAAGATTGCAAGAACTGCTAATT,mature-mt_tRNA-Ser-GCT_5_end	0.0760213	0.898452	14566	6169	7087	23895	4626	5534
AAGAAAGATTGCAAGAACTGCTAATTC,mature-mt_tRNA-Ser-GCT_5_end	0.0772717	0.874664	21765	12616	13672	29488	13677	10615
AAGAAAGATTGCAAGAACTGCTAATTCA,mature-mt_tRNA-Ser-GCT_5_end	0.146265	0.79648	4975	2585	3330	9677	2104	2044
AAGAAAGATTGCAAGAACTGCTAATTCAT,mature-mt_tRNA-Ser-GCT_5_end	-0.240186	0.715561	318	150	184	511	94	57
AAGAAAGATTGCAAGAACTGCTAATTCATG,mature-mt_tRNA-Ser-GCT_5_end	-0.274828	0.693452	1985	526	1038	2892	335	402
AAGAAAGATTGCAAGAACTGCTAATTCATGC,mature-mt_tRNA-Ser-GCT_5_end	-0.848563	0.105923	651	502	663	727	166	212
AAGAAAGATTGCAAGAACTGCTAATTCATGCT,mature-mt_tRNA-Ser-GCT_5_end	-1.07818	0.0573885	431	258	490	426	88	109
AAGAAAGATTGCAAGAACTGCTAATTCATGCTT,mature-mt_tRNA-Ser-GCT_5_end	-1.04065	0.130665	492	220	500	574	49	87
AAGAAAGATTGCAAGAACTGCTAATTCATGCTTC,mature-mt_tRNA-Ser-GCT_5_end	-0.92756	0.172661	640	238	472	692	78	94
AAGAAAGATTGCAAGAACTGCTAATTCATGCTTCC,mature-mt_tRNA-Ser-GCT_5_end	-0.875324	0.246843	1759	427	1210	2006	143	202
AAGAAAGATTGCAAGAACTGCTAATTCATGCTTCCA,mature-mt_tRNA-Ser-GCT_5_end	-0.66836	0.498365	13	11	25	30	5	1
AAGAAAGATTGCAAGAACTGCTAATTCATGCTTCCAT,mature-mt_tRNA-Ser-GCT_5_end	-0.390021	0.674429	16	11	18	30	2	7
AAGAAAGATTGCAAGAACTGCTAATTCATGCTTCCATA,mature-mt_tRNA-Ser-GCT_5_end	-0.889136	0.827507	0	0	1	0	0	0
AAGAAAGATTGCAAGAACTGCTAATTCATGCTTCCATATTT,mature-mt_tRNA-Ser-GCT_5_end	-0.889136	0.827507	0	1	0	0	0	0
AAGAAAGATTGCAAGAACTGCTAATTCATGCTTCCATG,mature-mt_tRNA-Ser-GCT_5_end	-1.01143	0.172551	93	31	127	111	12	22
AAGAAAGATTGCAAGAACTGCTAATTCATGCTTCCATGT,mature-mt_tRNA-Ser-GCT_5_end	-1.3629	0.0469849	55	36	72	49	10	11
AAGAAAGATTGCAAGAACTGCTAATTCATGCTTCCATGTT,mature-mt_tRNA-Ser-GCT_5_end	-1.25542	0.0438785	273	123	291	220	33	69
AAGAAAGATTGCAAGAACTGCTAATTCATGCTTCCATGTTT,mature-mt_tRNA-Ser-GCT_5_end	-1.30576	0.0441857	1093	345	1096	902	147	158
AAGAAAGATTGCAAGAACTGCTAATTCATGCTTCCATGTTTA,mature-mt_tRNA-Ser-GCT_5_end	-1.43753	0.0515228	213	73	207	181	14	26
AAGAAAGATTGCAAGAACTGCTAATTCATGCTTCCATGTTTAA,mature-mt_tRNA-Ser-GCT_5_end	-1.08948	0.148563	48	20	85	59	10	12
AAGAAAGATTGCAAGAACTGCTAATTCATGCTTCCATGTTTAAA,mature-mt_tRNA-Ser-GCT_5_end	-1.20143	0.404008	4	4	9	6	0	2
AAGAAAGATTGCAAGAACTGCTAATTCATGCTTCCATGTTTAAAA,mature-mt_tRNA-Ser-GCT_5_end	-1.8128	0.653302	1	1	0	0	0	0
AAGAACTGCTAATTC,mature-mt_tRNA-Ser-GCT	4.42325	1.19818e-05	7	2	0	20	127	29
AAGAACTGCTAATTCA,mature-mt_tRNA-Ser-GCT	2.3794	0.291181	0	0	2	7	4	0
AAGAACTGCTAATTCATG,mature-mt_tRNA-Ser-GCT	0.704684	0.398163	55	14	13	128	25	12
AAGAACTGCTAATTCATGC,mature-mt_tRNA-Ser-GCT	-0.185769	0.875077	15	2	7	6	14	1
AAGAACTGCTAATTCATGCT,mature-mt_tRNA-Ser-GCT	-1.69942	0.674478	0	1	1	0	0	0
AAGAACTGCTAATTCATGCTT,mature-mt_tRNA-Ser-GCT	-1.746	0.665753	0	0	2	0	0	0
AAGAACTGCTAATTCATGCTTC,mature-mt_tRNA-Ser-GCT	-0.308561	0.868288	7	2	0	1	6	0
AAGAACTGCTAATTCATGCTTCC,mature-mt_tRNA-Ser-GCT	-0.586631	0.62004	5	7	8	9	4	1
AAGAACTGCTAATTCATGCTTCCA,mature-mt_tRNA-Ser-GCT	-2.97151	0.428746	4	0	0	0	0	0
AAGAACTGCTAATTCATGCTTCCAT,mature-mt_tRNA-Ser-GCT	-3.55747	0.272426	6	0	0	0	0	0
AAGAACTGCTAATTCATGCTTCCATG,mature-mt_tRNA-Ser-GCT	0.320161	0.897032	0	0	4	3	0	2
AAGAACTGCTAATTCATGCTTCCATGT,mature-mt_tRNA-Ser-GCT	-1.45895	0.489155	2	7	0	1	2	0
AAGAACTGCTAATTCATGCTTCCATGTT,mature-mt_tRNA-Ser-GCT	0.283107	0.723404	7	20	13	23	13	11
AAGAACTGCTAATTCATGCTTCCATGTTT,mature-mt_tRNA-Ser-GCT	0.00263706	0.99653	40	38	28	44	35	25
AAGAACTGCTAATTCATGCTTCCATGTTTA,mature-mt_tRNA-Ser-GCT	-0.804733	0.456307	16	8	4	9	6	2
AAGAACTGCTAATTCATGCTTCCATGTTTAA,mature-mt_tRNA-Ser-GCT	-0.394771	0.84318	4	1	1	0	1	3
AAGAACTGCTAATTCATGCTTCCATGTTTAAA,mature-mt_tRNA-Ser-GCT	-1.746	0.665753	0	0	2	0	0	0
AAGAACTGCTAATTCATGCTTCCATGTTTAAAAAC,mature-mt_tRNA-Ser-GCT	-1.79374	0.461867	2	2	2	2	0	0
AAGAACTGCTAATTCATGCTTCCATGTTTAAAAACA,mature-mt_tRNA-Ser-GCT	0.0726449	0.985796	0	1	0	0	0	1
AAGAAGTAGTTTAAT,mature-mt_tRNA-Pro-TGG	3.07206	0.41318	0	0	0	6	0	0
AAGAAGTAGTTTAATT,mature-mt_tRNA-Pro-TGG	4.47672	0.253293	0	0	1	0	20	0
AAGAAGTAGTTTAATTAG,mature-mt_tRNA-Pro-TGG	0.424819	0.679101	4	5	12	8	13	5
AAGAAGTAGTTTAATTAGA,mature-mt_tRNA-Pro-TGG	0.745639	0.431877	4	9	15	22	21	3
AAGAAGTAGTTTAATTAGAA,mature-mt_tRNA-Pro-TGG	0.673767	0.70426	0	4	3	7	0	4
AAGAAGTAGTTTAATTAGAAT,mature-mt_tRNA-Pro-TGG	1.34706	0.305979	4	2	2	10	10	1
AAGAAGTAGTTTAATTAGAATA,mature-mt_tRNA-Pro-TGG	1.26099	0.123326	4	18	14	59	10	20
AAGAAGTAGTTTAATTAGAATAC,mature-mt_tRNA-Pro-TGG	0.990808	0.433086	0	5	7	9	9	4
AAGAAGTAGTTTAATTAGAATACC,mature-mt_tRNA-Pro-TGG	2.17278	0.00372849	7	15	14	42	86	19
AAGAAGTAGTTTAATTAGAATACCA,mature-mt_tRNA-Pro-TGG	3.52301	0.0934821	0	0	1	2	7	2
AAGAAGTAGTTTAATTAGAATACCAG,mature-mt_tRNA-Pro-TGG	0.756775	0.424946	1	17	11	22	15	9
AAGAAGTAGTTTAATTAGAATACCAGC,mature-mt_tRNA-Pro-TGG	0.964075	0.229496	2	34	21	39	36	25
AAGAAGTAGTTTAATTAGAATACCAGCT,mature-mt_tRNA-Pro-TGG	0.297	0.657802	26	188	104	83	169	81
AAGAAGTAGTTTAATTAGAATACCAGCTT,mature-mt_tRNA-Pro-TGG	0.176943	0.845678	1	28	33	20	14	27
AAGAAGTAGTTTAATTAGAATACCAGCTTT,mature-mt_tRNA-Pro-TGG	0.693977	0.417243	3	12	19	21	13	17
AAGAAGTAGTTTAATTAGAATACCAGCTTTG,mature-mt_tRNA-Pro-TGG	0.882032	0.359233	2	18	7	9	20	13
AAGAAGTAGTTTAATTAGAATACCAGCTTTGG,mature-mt_tRNA-Pro-TGG	0.273882	0.869201	1	5	1	4	1	3
AAGAAGTAGTTTAATTAGAATACCAGCTTTGGGTGCTGGT,mature-mt_tRNA-Pro-TGG	-0.889136	0.827507	0	0	1	0	0	0
AAGAAGTAGTTTAATTAGAATACCAGCTTTGGGTGCTGGTGG,mature-mt_tRNA-Pro-TGG	-1.6517	0.683455	0	2	0	0	0	0
AAGAAGTAGTTTAATTAGAATGCCAGCTT,mature-mt_tRNA-Pro-TGG	-1.6517	0.683455	0	2	0	0	0	0
AAGAATTACTTTGAT,mature-mt_tRNA-Ile-GAT	3.47966	0.252571	0	0	0	0	2	3
AAGAATTACTTTGATA,mature-mt_tRNA-Ile-GAT	3.51926	0.29003	0	0	0	0	0	5
AAGAATTACTTTGATAG,mature-mt_tRNA-Ile-GAT	3.41603	0.267843	0	0	0	3	3	0
AAGAATTACTTTGATAGA,mature-mt_tRNA-Ile-GAT	-0.784214	0.846156	0	0	2	1	0	0
AAGAATTACTTTGATAGAG,mature-mt_tRNA-Ile-GAT	2.25052	0.427558	1	0	0	2	3	0
AAGAATTACTTTGATAGAGT,mature-mt_tRNA-Ile-GAT	1.37739	0.446959	6	0	0	16	0	4
AAGAATTACTTTGATAGAGTA,mature-mt_tRNA-Ile-GAT	-0.116709	0.976281	0	2	0	2	0	0
AAGAATTACTTTGATAGAGTAA,mature-mt_tRNA-Ile-GAT	-0.689922	0.864759	0	2	0	1	0	0
AAGAATTACTTTGATAGAGTAAA,mature-mt_tRNA-Ile-GAT	-1.6517	0.683455	0	2	0	0	0	0
AAGAATTACTTTGATAGAGTAAAT,mature-mt_tRNA-Ile-GAT	3.76436	0.190366	0	0	0	0	1	5
AAGAATTACTTTGATAGAGTAAATT,mature-mt_tRNA-Ile-GAT	1.23293	0.545838	0	3	1	8	0	2
AAGAATTACTTTGATAGAGTAAATTA,mature-mt_tRNA-Ile-GAT	2.22697	0.304901	0	0	2	7	1	2
AAGAATTACTTTGATAGAGTAAATTAT,mature-mt_tRNA-Ile-GAT	2.09257	0.603263	0	0	0	3	0	0
AAGAATTACTTTGATAGAGTAAATTATAG,mature-mt_tRNA-Ile-GAT	1.03442	0.799879	0	0	0	0	0	1
AAGAATTACTTTGATAGAGTAAATTATAGA,mature-mt_tRNA-Ile-GAT	2.09872	0.602152	0	0	0	0	2	0
AAGAATTACTTTGATAGAGTAAATTATAGAG,mature-mt_tRNA-Ile-GAT	0.0726449	0.985796	0	0	1	0	0	1
AAGAATTACTTTGATAGAGTAAATTATAGAGG,mature-mt_tRNA-Ile-GAT	-0.259505	0.77184	9	11	16	16	4	10
AAGAATTACTTTGATAGAGTAAATTATAGAGGT,mature-mt_tRNA-Ile-GAT	-0.335901	0.874687	2	1	3	6	0	0
AAGAATTACTTTGATAGAGTAAATTATAGAGGTT,mature-mt_tRNA-Ile-GAT	-0.716611	0.565465	8	3	17	17	0	3
AAGAATTACTTTGATAGAGTAAATTATAGAGGTTC,mature-mt_tRNA-Ile-GAT	-0.899384	0.445548	6	6	13	12	1	2
AAGAATTACTTTGATAGAGTAAATTATAGAGGTTCA,mature-mt_tRNA-Ile-GAT	1.35942	0.695143	0	1	0	2	1	0
AAGAATTACTTTGATAGAGTAAATTATAGAGGTTCAAG,mature-mt_tRNA-Ile-GAT	-1.67747	0.540966	4	0	1	2	0	0
AAGACATATAGGATA,mature-mt_tRNA-Ser-TGA	1.03442	0.799879	0	0	0	0	0	1
AAGACATATAGGATAT,mature-mt_tRNA-Ser-TGA	3.51926	0.29003	0	0	0	0	0	5
AAGACATATAGGATATG,mature-mt_tRNA-Ser-TGA	1.72139	0.586691	1	0	0	3	1	0
AAGACATATAGGATATGA,mature-mt_tRNA-Ser-TGA	2.69004	0.499796	0	0	0	0	3	0
AAGACATATAGGATATGAG,mature-mt_tRNA-Ser-TGA	2.14031	0.504816	0	0	1	0	4	0
AAGACATATAGGATATGAGA,mature-mt_tRNA-Ser-TGA	-2.23175	0.324505	4	3	1	2	0	0
AAGACATATAGGATATGAGATT,mature-mt_tRNA-Ser-TGA	-0.0813188	0.979126	1	0	1	1	1	0
AAGACATATAGGATATGAGATTG,mature-mt_tRNA-Ser-TGA	-3.18771	0.0892568	2	8	7	2	0	0
AAGACATATAGGATATGAGATTGG,mature-mt_tRNA-Ser-TGA	0.635966	0.627815	3	4	3	4	2	8
AAGACATATAGGATATGAGATTGGCT,mature-mt_tRNA-Ser-TGA	1.59362	0.453222	0	2	1	0	3	4
AAGACATATAGGATATGAGATTGGCTT,mature-mt_tRNA-Ser-TGA	0.609009	0.671827	7	1	1	2	7	4
AAGACATATAGGATATGAGATTGGCTTG,mature-mt_tRNA-Ser-TGA	1.11169	0.503705	3	2	0	5	4	2
AAGACATATAGGATATGAGATTGGCTTGA,mature-mt_tRNA-Ser-TGA	0.394941	0.904484	0	2	0	0	1	1
AAGACATATAGGATATGAGATTGGCTTGAAACC,mature-mt_tRNA-Ser-TGA	-0.889136	0.827507	1	0	0	0	0	0
AAGACTTAAAACCTT,mature-mt_tRNA-Leu-TAA	-0.889136	0.827507	0	1	0	0	0	0
AAGACTTAAAACCTTG,mature-mt_tRNA-Leu-TAA	2.83659	0.261934	1	0	0	5	0	3
AAGACTTAAAACCTTGTT,mature-mt_tRNA-Leu-TAA	1.03442	0.799879	0	0	0	1	0	0
AAGACTTAAAACCTTGTTC,mature-mt_tRNA-Leu-TAA	3.0919	0.357462	0	0	0	3	2	0
AAGACTTAAAACCTTGTTCCC,mature-mt_tRNA-Leu-TAA	2.71454	0.0250013	2	5	1	14	33	1
AAGACTTAAAACCTTGTTCCCAG,mature-mt_tRNA-Leu-TAA	0.0726449	0.985796	1	0	0	1	0	0
AAGACTTAAAACCTTGTTCCCAGA,mature-mt_tRNA-Leu-TAA	-0.335174	0.911251	1	2	0	0	2	0
AAGACTTAAAACCTTGTTCCCAGAG,mature-mt_tRNA-Leu-TAA	1.03442	0.799879	0	0	0	1	0	0
AAGACTTAAAACCTTGTTCCCAGAGG,mature-mt_tRNA-Leu-TAA	1.13517	0.769057	1	0	0	3	0	0
AAGACTTAAAACCTTGTTCCCAGAGGT,mature-mt_tRNA-Leu-TAA	-1.96161	0.625864	2	0	0	0	0	0
AAGACTTAAAACCTTGTTCCCAGAGGTT,mature-mt_tRNA-Leu-TAA	-1.26967	0.741953	0	3	0	1	0	0
AAGACTTAAAACCTTGTTCCCAGAGGTTC,mature-mt_tRNA-Leu-TAA	0.0351502	0.989294	1	0	2	1	2	0
AAGACTTAAAACCTTGTTCCCAGAGGTTCA,mature-mt_tRNA-Leu-TAA	-2.5541	0.521517	3	0	0	0	0	0
AAGAGCATTTGACTGC,mature-tRNA-Cys-GCA	1.03442	0.799879	0	0	0	1	0	0
AAGAGCGTTAACCTT,mature-mt_tRNA-Lys-TTT	1.22074	0.581529	0	4	0	0	3	4
AAGAGCGTTAACCTTT,mature-mt_tRNA-Lys-TTT	-3.76794	0.136318	2	3	3	0	0	0
AAGAGCGTTAACCTTTT,mature-mt_tRNA-Lys-TTT	1.74369	0.363523	1	2	0	2	6	1
AAGAGCGTTAACCTTTTAA,mature-mt_tRNA-Lys-TTT	1.03442	0.799879	0	0	0	1	0	0
AAGAGCGTTAACCTTTTAAG,mature-mt_tRNA-Lys-TTT	2.54495	0.47752	0	0	0	1	1	1
AAGAGCGTTAACCTTTTAAGT,mature-mt_tRNA-Lys-TTT	-0.909161	0.759845	4	0	0	3	0	0
AAGAGCGTTAACCTTTTAAGTT,mature-mt_tRNA-Lys-TTT	-1.85677	0.645151	1	0	1	0	0	0
AAGAGCGTTAACCTTTTAAGTTA,mature-mt_tRNA-Lys-TTT	2.18517	0.586649	0	0	0	0	0	2
AAGAGCGTTAACCTTTTAAGTTAAAG,mature-mt_tRNA-Lys-TTT	0.645315	0.873754	0	1	0	2	0	0
AAGAGCGTTAACCTTTTAAGTTAAAGT,mature-mt_tRNA-Lys-TTT	0.646744	0.576703	2	3	9	12	6	4
AAGAGCGTTAACCTTTTAAGTTAAAGTT,mature-mt_tRNA-Lys-TTT	-0.314205	0.878243	8	0	0	0	3	3
AAGAGCGTTAACCTTTTAAGTTAAAGTTAGA,mature-mt_tRNA-Lys-TTT	-0.889136	0.827507	1	0	0	0	0	0
AAGAGCGTTAACCTTTTAAGTTAAAGTTAGAGA,mature-mt_tRNA-Lys-TTT	-0.889136	0.827507	1	0	0	0	0	0
AAGAGCGTTAACCTTTTAAGTTAAAGTTAGAGAC,mature-mt_tRNA-Lys-TTT	3.27365	0.306367	0	0	0	2	0	3
AAGAGCGTTAACCTTTTAAGTTAAAGTTAGAGACC,mature-mt_tRNA-Lys-TTT	-2.83643	0.381781	2	1	1	0	0	0
AAGAGCGTTAACCTTTTAAGTTAAAGTTAGAGACCT,mature-mt_tRNA-Lys-TTT	-0.889136	0.827507	0	0	1	0	0	0
AAGAGCGTTAACCTTTTAAGTTAAAGTTAGAGACCTT,mature-mt_tRNA-Lys-TTT	1.31772	0.467449	2	1	1	7	4	0
AAGAGGTCCCCGGTT,mature-tRNA-Cys-GCA	0.681875	0.782658	0	2	1	1	0	3
AAGAGGTCCCCGGTTC,mature-tRNA-Cys-GCA	0.158433	0.872561	19	15	4	10	27	3
AAGAGGTCCCCGGTTCA,mature-tRNA-Cys-GCA	-2.15131	0.453946	1	0	4	0	1	0
AAGAGGTCCCCGGTTCAA,mature-tRNA-Cys-GCA	1.03442	0.799879	0	0	0	0	0	1
AAGAGGTCCCCGGTTCAAA,mature-tRNA-Cys-GCA	-3.63979	0.253143	0	8	0	0	0	0
AAGAGGTCCCTGGTT,mature-tRNA-Cys-GCA	-1.96161	0.625864	2	0	0	0	0	0
AAGAGGTCCCTGGTTC,mature-tRNA-Cys-GCA	2.27364	0.042143	9	0	4	11	42	7
AAGAGGTCCCTGGTTCA,mature-tRNA-Cys-GCA	1.03442	0.799879	0	0	0	1	0	0
AAGAGGTCCCTGGTTCAA,mature-tRNA-Cys-GCA	2.09872	0.602152	0	0	0	0	2	0
AAGAGGTCCCTGGTTCAAATCCG,mature-tRNA-Cys-GCA	2.81066	0.480072	0	0	0	5	0	0
AAGAGGTCCCTGGTTCAAATCCGGGTGCCCCCTC,mature-tRNA-Cys-GCA	-2.74289	0.490177	0	0	4	0	0	0
AAGATATTAGTAAAA,mature-mt_tRNA-Asp-GTC_5_end	-1.41211	0.566627	0	4	3	3	0	0
AAGATATTAGTAAAAT,mature-mt_tRNA-Asp-GTC_5_end	0.399915	0.692209	4	3	19	12	7	13
AAGATATTAGTAAAATC,mature-mt_tRNA-Asp-GTC_5_end	2.39458	0.00259349	5	52	51	78	327	68
AAGATATTAGTAAAATCA,mature-mt_tRNA-Asp-GTC_5_end	0.666554	0.577982	2	4	7	9	9	2
AAGATATTAGTAAAATCAA,mature-mt_tRNA-Asp-GTC_5_end	-1.11112	0.539845	1	4	5	1	0	3
AAGATATTAGTAAAATCAAT,mature-mt_tRNA-Asp-GTC_5_end	0.502257	0.526754	6	13	21	21	17	15
AAGATATTAGTAAAATCAATT,mature-mt_tRNA-Asp-GTC_5_end	1.63718	0.00719753	12	56	29	138	88	61
AAGATATTAGTAAAATCAATTA,mature-mt_tRNA-Asp-GTC_5_end	0.437596	0.711933	0	6	21	22	13	2
AAGATATTAGTAAAATCAATTAC,mature-mt_tRNA-Asp-GTC_5_end	1.56591	0.0105215	18	47	32	106	122	41
AAGATATTAGTAAAATCAATTACA,mature-mt_tRNA-Asp-GTC_5_end	0.909183	0.218116	7	13	26	40	26	18
AAGATATTAGTAAAATCAATTACAT,mature-mt_tRNA-Asp-GTC_5_end	0.463155	0.785292	1	4	1	4	3	1
AAGATATTAGTAAAATCAATTACATA,mature-mt_tRNA-Asp-GTC_5_end	1.17026	0.0937711	7	41	20	87	34	30
AAGATATTAGTAAAATCAATTACATAA,mature-mt_tRNA-Asp-GTC_5_end	1.82044	0.05576	1	8	7	30	9	16
AAGATATTAGTAAAATCAATTACATAAC,mature-mt_tRNA-Asp-GTC_5_end	1.53503	0.126652	2	5	8	31	9	6
AAGATATTAGTAAAATCAATTACATAACT,mature-mt_tRNA-Asp-GTC_5_end	0.250497	0.727942	12	35	44	78	15	21
AAGATATTAGTAAAATCAATTACATAACTT,mature-mt_tRNA-Asp-GTC_5_end	0.179572	0.895035	0	9	7	9	1	7
AAGATATTAGTAAAATCAATTACATAACTTT,mature-mt_tRNA-Asp-GTC_5_end	1.84243	0.366381	0	1	2	10	0	2
AAGATATTAGTAAAATCAATTACATAACTTTG,mature-mt_tRNA-Asp-GTC_5_end	1.66497	0.0585469	4	3	13	31	18	14
AAGATATTAGTAAAATCAATTACATAACTTTGT,mature-mt_tRNA-Asp-GTC_5_end	0.488443	0.490185	18	64	77	166	19	51
AAGATATTAGTAAAATCAATTACATAACTTTGTC,mature-mt_tRNA-Asp-GTC_5_end	0.658558	0.363239	128	182	400	1114	80	126
AAGATATTAGTAAAATCAATTACATAACTTTGTCA,mature-mt_tRNA-Asp-GTC_5_end	0.258686	0.767812	26	34	95	196	5	21
AAGATATTAGTAAAATCAATTACATAACTTTGTCAA,mature-mt_tRNA-Asp-GTC_5_end	0.415397	0.759602	2	3	6	12	1	3
AAGATATTAGTAAAATCAATTACATAACTTTGTCAAA,mature-mt_tRNA-Asp-GTC_5_end	-0.308469	0.92952	1	0	1	2	0	0
AAGATATTAGTAAAATCAATTACATAACTTTGTCAAAG,mature-mt_tRNA-Asp-GTC_5_end	-1.17616	0.538456	0	2	13	8	0	0
AAGATATTAGTAAAATCAATTACATAACTTTGTCAAAGT,mature-mt_tRNA-Asp-GTC_5_end	-0.156673	0.900007	5	3	11	17	2	1
AAGATATTAGTAAAATCAATTACATAACTTTGTCAAAGTT,mature-mt_tRNA-Asp-GTC_5_end	-0.56644	0.598599	6	10	26	29	1	3
AAGATATTAGTAAAATCAATTACATAACTTTGTCAAAGTTA,mature-mt_tRNA-Asp-GTC_5_end	-0.0344511	0.981876	0	2	10	5	2	4
AAGATATTAGTAAAATCAATTACATAACTTTGTCAAAGTTAA,mature-mt_tRNA-Asp-GTC_5_end	0.41493	0.86672	0	0	4	5	0	1
AAGATATTAGTAAAATCAATTACATAACTTTGTCAAAGTTAAA,mature-mt_tRNA-Asp-GTC_5_end	-2.57607	0.342098	0	1	6	1	0	0
AAGATATTAGTAAAATCAATTACATAACTTTGTCAAAGTTAAAT,mature-mt_tRNA-Asp-GTC_5_end	0.428977	0.885517	0	0	3	5	0	0
AAGATATTAGTAAAATCAATTACATAACTTTGTCAAAGTTAAATT,mature-mt_tRNA-Asp-GTC_5_end	-0.362258	0.867459	0	2	4	4	0	1
AAGATCACGGGTTCGAACC,mature-tRNA-Thr-CGT	-0.889136	0.827507	0	1	0	0	0	0
AAGATCACGGGTTCGAACCCCGTCCGTG,mature-tRNA-Thr-CGT	-0.601502	0.847737	0	4	0	3	0	0
AAGATCACGGGTTCGAACCCCGTCCGTGCCTCC,mature-tRNA-Thr-CGT	-0.889136	0.827507	0	0	1	0	0	0
AAGATCACGGGTTCGAACCCCGTCCGTGCCTCCA,mature-tRNA-Thr-CGT_CCA_end	1.03442	0.799879	0	0	0	1	0	0
AAGATCGCGGGTTCGAACC,mature-tRNA-Thr-CGT	1.21871	0.746427	1	0	0	0	0	2
AAGATCGCGGGTTCGAACCCCGTCCGTG,mature-tRNA-Thr-CGT	2.99658	0.344976	0	0	0	1	2	1
AAGATCTTCTCTTCT,mature-mt_tRNA-Thr-TGT	1.03442	0.799879	0	0	0	1	0	0
AAGATCTTCTCTTCTC,mature-mt_tRNA-Thr-TGT	1.03442	0.799879	0	0	0	0	1	0
AAGATCTTCTCTTCTCAA,mature-mt_tRNA-Thr-TGT	2.18517	0.586649	0	0	0	0	0	2
AAGATCTTCTCTTCTCAAG,mature-mt_tRNA-Thr-TGT	-0.0850786	0.971652	2	3	0	0	4	0
AAGATCTTCTCTTCTCAAGA,mature-mt_tRNA-Thr-TGT	1.60709	0.692322	0	0	0	2	0	0
AAGATCTTCTCTTCTCAAGACA,mature-mt_tRNA-Thr-TGT_3_end	-1.96161	0.625864	2	0	0	0	0	0
AAGATCTTCTCTTCTCAAGACACC,mature-mt_tRNA-Thr-TGT	-0.792653	0.585859	6	3	3	3	3	1
AAGATCTTCTCTTCTCAAGACACCA,mature-mt_tRNA-Thr-TGT_CCA_end	0.154913	0.820534	20	24	27	20	30	22
AAGATTCCAGGTTCGACT,mature-tRNA-Arg-ACG	-1.746	0.665753	0	0	2	0	0	0
AAGATTCCAGGTTCGACTCCTGGCTGGCTCGC,mature-tRNA-Arg-ACG	-0.889136	0.827507	0	0	1	0	0	0
AAGATTCCAGGTTCGACTCCTGGCTGGCTCGCC,mature-tRNA-Arg-ACG	0.59898	0.760435	3	0	2	7	0	2
AAGATTCCAGGTTCGACTCCTGGCTGGCTCGCCA,mature-tRNA-Arg-ACG_CCA_end	2.09872	0.602152	0	0	0	0	2	0
AAGATTCCCATTCTTGCG,mature-tRNA-Gly-CCC	1.1347	0.767264	1	0	0	0	2	0
AAGATTCCCATTCTTGCGACCCG,mature-tRNA-Gly-CCC	-1.69942	0.674478	0	1	1	0	0	0
AAGATTCCCATTCTTGCGACCCGG,mature-tRNA-Gly-CCC	-2.64177	0.506839	0	4	0	0	0	0
AAGATTCTAGGTTCGACTCCTGGCTGGCTCGCC,mature-tRNA-Arg-ACG	-0.889136	0.827507	1	0	0	0	0	0
AAGATTCTAGGTTCGACTCCTGGCTGGCTCGCCA,mature-tRNA-Arg-ACG_CCA_end	1.03442	0.799879	0	0	0	0	1	0
AAGATTGAGGGTTCG,mature-tRNA-Arg-TCG;mature-tRNA-Arg-CCG	0.0726449	0.985796	0	1	0	0	0	1
AAGATTGAGGGTTCGAATCC,mature-tRNA-Arg-TCG	1.03442	0.799879	0	0	0	1	0	0
AAGATTGAGGGTTCGAATCCCTTC,mature-tRNA-Arg-TCG	-1.6517	0.683455	0	2	0	0	0	0
AAGATTGAGGGTTCGAATCCCTTCGTGG,mature-tRNA-Arg-TCG	1.03442	0.799879	0	0	0	0	1	0
AAGATTGAGGGTTCGAATCCCTTCGTGGT,mature-tRNA-Arg-TCG	1.03442	0.799879	0	0	0	1	0	0
AAGATTGAGGGTTCGAATCCCTTCGTGGTTAC,mature-tRNA-Arg-TCG	2.18517	0.586649	0	0	0	0	0	2
AAGATTGAGGGTTCGAATCCCTTCGTGGTTACC,mature-tRNA-Arg-TCG	-2.34488	0.55738	1	2	0	0	0	0
AAGATTGAGGGTTCGAATCCCTTCGTGGTTACCA,mature-tRNA-Arg-TCG_CCA_end	-1.746	0.665753	0	0	2	0	0	0
AAGATTGAGGGTTCGAATCCCTTCGTGGTTG,mature-tRNA-Arg-TCG_3_end	0.521768	0.748735	1	2	3	3	2	3
AAGATTGAGGGTTCGAATCCCTTCGTGGTTGC,mature-tRNA-Arg-TCG	0.968185	0.674741	1	0	2	6	0	1
AAGATTGAGGGTTCGAATCCCTTCGTGGTTGCC,mature-tRNA-Arg-TCG	-1.8128	0.653302	1	1	0	0	0	0
AAGATTGAGGGTTCGAATCCCTTCGTGGTTGCCA,mature-tRNA-Arg-TCG_CCA_end	-1.50155	0.545363	0	4	3	0	2	0
AAGATTGAGGGTTCGAGTCCCTTC,mature-tRNA-Arg-TCG;mature-tRNA-Arg-CCG	-2.32895	0.560157	0	0	3	0	0	0
AAGATTGAGGGTTCGAGTCCCTTCGTG,mature-tRNA-Arg-TCG;mature-tRNA-Arg-CCG	2.09257	0.603263	0	0	0	3	0	0
AAGATTGAGGGTTCGAGTCCCTTCGTGGT,mature-tRNA-Arg-TCG;mature-tRNA-Arg-CCG	2.67335	0.480422	0	0	0	3	1	0
AAGATTGAGGGTTCGAGTCCCTTCGTGGTCG,mature-tRNA-Arg-TCG_3_end;mature-tRNA-Arg-CCG_3_end	-1.746	0.665753	0	0	2	0	0	0
AAGATTGAGGGTTCGAGTCCCTTCGTGGTCGC,mature-tRNA-Arg-TCG;mature-tRNA-Arg-CCG	2.14243	0.594294	0	0	0	0	1	1
AAGATTGAGGGTTCGAGTCCCTTCGTGGTCGCC,mature-tRNA-Arg-TCG;mature-tRNA-Arg-CCG	-0.366415	0.828151	1	7	2	3	0	4
AAGATTGAGGGTTCGAGTCCCTTCGTGGTCGCCA,mature-tRNA-Arg-TCG_CCA_end;mature-tRNA-Arg-CCG_CCA_end	-0.804466	0.635199	0	4	7	3	2	1
AAGATTGCAAGAACT,mature-mt_tRNA-Ser-GCT	1.01776	0.406932	6	3	2	20	3	3
AAGATTGCAAGAACTG,mature-mt_tRNA-Ser-GCT	0.185591	0.861778	10	5	4	13	6	4
AAGATTGCAAGAACTGC,mature-mt_tRNA-Ser-GCT	0.0654644	0.935612	28	11	20	48	16	6
AAGATTGCAAGAACTGCT,mature-mt_tRNA-Ser-GCT	1.03492	0.249578	16	10	3	46	10	11
AAGATTGCAAGAACTGCTA,mature-mt_tRNA-Ser-GCT	4.48624	0.0221262	1	0	0	25	4	0
AAGATTGCAAGAACTGCTAA,mature-mt_tRNA-Ser-GCT	3.79708	0.0553455	1	0	0	2	6	5
AAGATTGCAAGAACTGCTAAT,mature-mt_tRNA-Ser-GCT	0.272404	0.884471	5	0	2	10	0	1
AAGATTGCAAGAACTGCTAATT,mature-mt_tRNA-Ser-GCT	-0.488746	0.817314	7	0	1	8	0	0
AAGATTGCAAGAACTGCTAATTC,mature-mt_tRNA-Ser-GCT	1.26414	0.236686	3	6	4	22	6	5
AAGATTGCAAGAACTGCTAATTCA,mature-mt_tRNA-Ser-GCT	1.46876	0.313752	4	2	0	5	5	6
AAGATTGCAAGAACTGCTAATTCAT,mature-mt_tRNA-Ser-GCT	-0.997532	0.795776	2	0	0	0	1	0
AAGATTGCAAGAACTGCTAATTCATG,mature-mt_tRNA-Ser-GCT	-1.50713	0.371888	10	0	6	6	1	0
AAGATTGCAAGAACTGCTAATTCATGC,mature-mt_tRNA-Ser-GCT	-1.83117	0.429127	4	3	0	1	0	1
AAGATTGCAAGAACTGCTAATTCATGCT,mature-mt_tRNA-Ser-GCT	-1.36649	0.584307	4	2	0	3	0	0
AAGATTGCAAGAACTGCTAATTCATGCTT,mature-mt_tRNA-Ser-GCT	-0.396358	0.806714	6	0	4	4	1	3
AAGATTGCAAGAACTGCTAATTCATGCTTC,mature-mt_tRNA-Ser-GCT	0.45842	0.826675	1	0	3	1	3	1
AAGATTGCAAGAACTGCTAATTCATGCTTCC,mature-mt_tRNA-Ser-GCT	-1.77502	0.476944	1	1	4	2	0	0
AAGATTGCAAGAACTGCTAATTCATGCTTCCA,mature-mt_tRNA-Ser-GCT	-0.889136	0.827507	0	0	1	0	0	0
AAGATTGCAAGAACTGCTAATTCATGCTTCCAT,mature-mt_tRNA-Ser-GCT	-2.5541	0.521517	3	0	0	0	0	0
AAGATTGCAAGAACTGCTAATTCATGCTTCCATAT,mature-mt_tRNA-Ser-GCT	1.03442	0.799879	0	0	0	0	1	0
AAGATTGCAAGAACTGCTAATTCATGCTTCCATGT,mature-mt_tRNA-Ser-GCT	-0.922161	0.768644	2	0	1	2	0	0
AAGATTGCAAGAACTGCTAATTCATGCTTCCATGTT,mature-mt_tRNA-Ser-GCT	0.389685	0.854901	0	0	5	5	1	1
AAGATTGCAAGAACTGCTAATTCATGCTTCCATGTTT,mature-mt_tRNA-Ser-GCT	-1.97168	0.236472	8	4	2	3	0	1
AAGATTGCAAGAACTGCTAATTCATGCTTCCATGTTTA,mature-mt_tRNA-Ser-GCT	-1.51535	0.650253	2	0	1	1	0	0
AAGATTGCAAGAACTGCTAATTCATGCTTCCATGTTTAA,mature-mt_tRNA-Ser-GCT	-2.4072	0.5454	1	0	2	0	0	0
AAGATTGCAGGTTCGAGTCCTGCCGCGG,mature-tRNA-Arg-TCG	2.09872	0.602152	0	0	0	0	2	0
AAGATTGCAGGTTCGAGTCCTGCCGCGGTCGC,mature-tRNA-Arg-TCG	-2.8935	0.406866	3	1	0	0	0	0
AAGATTGCAGGTTCGAGTCCTGCCGCGGTCGCC,mature-tRNA-Arg-TCG	-0.00244691	0.999023	0	5	1	1	3	1
AAGATTGCAGGTTCGAGTCCTGCCGCGGTCGCCA,mature-tRNA-Arg-TCG_CCA_end	-1.62616	0.398452	0	1	12	2	0	2
AAGATTGGGGGTTCGAG,mature-tRNA-Arg-CCG	-0.889136	0.827507	1	0	0	0	0	0
AAGATTGGGGGTTCGAGTC,mature-tRNA-Arg-CCG	2.18517	0.586649	0	0	0	0	0	2
AAGATTGGGGGTTCGAGTCCC,mature-tRNA-Arg-CCG	-1.746	0.665753	0	0	2	0	0	0
AAGATTGGGGGTTCGAGTCCCTT,mature-tRNA-Arg-CCG	-2.4072	0.5454	1	0	2	0	0	0
AAGATTGGGGGTTCGAGTCCCTTCGTGGT,mature-tRNA-Arg-CCG	3.29378	0.352189	0	0	0	7	0	0
AAGATTGGGGGTTCGAGTCCCTTCGTGGTCGC,mature-tRNA-Arg-CCG	2.78009	0.485032	0	0	0	0	0	3
AAGATTGGGGGTTCGAGTCCCTTCGTGGTCGCC,mature-tRNA-Arg-CCG	-0.373436	0.859382	0	9	0	5	2	0
AAGATTGGGGGTTCGAGTCCCTTCGTGGTCGCCA,mature-tRNA-Arg-CCG_CCA_end	-4.14821	0.102353	0	6	5	0	0	0
AAGATTTCATGACCA,mature-mt_tRNA-Val-TAC	-0.889136	0.827507	1	0	0	0	0	0
AAGATTTCATGACCAATG,mature-mt_tRNA-Val-TAC	1.72295	0.616045	1	0	0	0	3	0
AAGATTTCATGACCAATGAAC,mature-mt_tRNA-Val-TAC	-0.122123	0.895891	11	25	7	4	12	17
AAGATTTCATGACCAATGAACA,mature-mt_tRNA-Val-TAC	0.63289	0.647553	3	4	2	10	4	1
AAGATTTCATGACCAATGAACAC,mature-mt_tRNA-Val-TAC	1.03442	0.799879	0	0	0	0	0	1
AAGATTTCATGACCAATGAACACT,mature-mt_tRNA-Val-TAC	1.08656	0.194674	6	36	15	11	35	51
AAGATTTCATGACCAATGAACACTC,mature-mt_tRNA-Val-TAC	-1.47717	0.524809	0	4	3	0	1	1
AAGATTTCATGACCAATGAACACTCT,mature-mt_tRNA-Val-TAC	0.0369027	0.962576	14	21	16	10	15	21
AAGATTTCATGACCAATGAACACTCTG,mature-mt_tRNA-Val-TAC	0.0726449	0.985796	0	0	1	1	0	0
AAGATTTCATGACCAATGAACACTCTGA,mature-mt_tRNA-Val-TAC_3_end	2.96082	0.398907	0	0	0	4	1	0
AAGATTTCATGACCAATGAACACTCTGAC,mature-mt_tRNA-Val-TAC	0.158387	0.865383	8	14	5	13	7	9
AAGATTTCATGACCAATGAACACTCTGACC,mature-mt_tRNA-Val-TAC	-0.0613319	0.950691	8	26	3	25	8	4
AAGATTTCATGACCAATGAACACTCTGACCA,mature-mt_tRNA-Val-TAC_CCA_end	0.126676	0.814959	46	70	84	73	56	73
AAGATTTCATGACCAATGGACACTCTGACCA,mature-mt_tRNA-Val-TAC_CCA_end	0.0726449	0.985796	0	1	0	1	0	0
AAGCAAAGCACTGAA,mature-mt_tRNA-Phe-GAA	1.03442	0.799879	0	0	0	0	0	1
AAGCAAAGCACTGAAAATG,mature-mt_tRNA-Phe-GAA	1.54287	0.671613	0	0	1	4	0	0
AAGCAAAGCACTGAAAATGCTTAGATGG,mature-mt_tRNA-Phe-GAA	-0.28965	0.929726	0	0	3	3	0	0
AAGCAAAGCACTGAAAATGCTTAGATGGA,mature-mt_tRNA-Phe-GAA	0.0726449	0.985796	0	1	0	0	1	0
AAGCAAAGCACTGAAAATGCTTAGATGGAT,mature-mt_tRNA-Phe-GAA	-0.889136	0.827507	0	0	1	0	0	0
AAGCAAAGCACTGAAAATGCTTAGATGGATA,mature-mt_tRNA-Phe-GAA	-2.55395	0.347754	5	0	1	1	0	0
AAGCAAAGCACTGAAAATGCTTAGATGGATAA,mature-mt_tRNA-Phe-GAA	-0.889136	0.827507	0	1	0	0	0	0
AAGCAAAGCACTGAAAATGCTTAGATGGATAATTGTATCCCA,mature-mt_tRNA-Phe-GAA	-0.889136	0.827507	0	1	0	0	0	0
AAGCAATTGATTTGCATTC,mature-mt_tRNA-Ala-TGC	1.03442	0.799879	0	0	0	0	0	1
AAGCAATTGATTTGCATTCA,mature-mt_tRNA-Ala-TGC	-1.8128	0.653302	1	1	0	0	0	0
AAGCAATTGATTTGCATTCAAT,mature-mt_tRNA-Ala-TGC	1.86141	0.58539	0	0	1	5	0	0
AAGCAATTGATTTGCATTCAATAG,mature-mt_tRNA-Ala-TGC	-0.889136	0.827507	1	0	0	0	0	0
AAGCAATTGATTTGCATTCAATAGA,mature-mt_tRNA-Ala-TGC	-1.89033	0.455103	8	0	0	3	0	0
AAGCAATTGATTTGCATTCAATAGATG,mature-mt_tRNA-Ala-TGC	2.49607	0.532374	0	0	0	4	0	0
AAGCAATTGATTTGCATTCAATAGATGT,mature-mt_tRNA-Ala-TGC	2.09257	0.603263	0	0	0	3	0	0
AAGCAATTGATTTGCATTCAATAGATGTA,mature-mt_tRNA-Ala-TGC	0.71189	0.724997	2	1	1	7	1	0
AAGCAATTGATTTGCATTCAATAGATGTAG,mature-mt_tRNA-Ala-TGC	-0.511621	0.772915	1	4	4	6	0	1
AAGCAATTGATTTGCATTCAATAGATGTAGG,mature-mt_tRNA-Ala-TGC	-1.02058	0.305773	16	13	21	25	1	3
AAGCAATTGATTTGCATTCAATAGATGTAGGA,mature-mt_tRNA-Ala-TGC	0.125044	0.897413	9	7	12	25	4	5
AAGCAATTGATTTGCATTCAATAGATGTAGGAT,mature-mt_tRNA-Ala-TGC	-0.0478796	0.949889	20	11	47	50	13	17
AAGCAATTGATTTGCATTCAATAGATGTAGGATG,mature-mt_tRNA-Ala-TGC	-0.583212	0.33352	103	84	103	113	20	67
AAGCAATTGATTTGCATTCAATAGATGTAGGATGA,mature-mt_tRNA-Ala-TGC	-0.44884	0.529947	16	26	39	37	12	12
AAGCAATTGATTTGCATTCAATAGATGTAGGATGAA,mature-mt_tRNA-Ala-TGC	-1.35661	0.287301	7	8	8	5	0	4
AAGCAATTGATTTGCATTCAATAGATGTAGGATGAAG,mature-mt_tRNA-Ala-TGC	-0.0712297	0.948037	7	6	7	3	8	6
AAGCAATTGATTTGCATTCAATAGATGTAGGATGAAGT,mature-mt_tRNA-Ala-TGC	-0.78464	0.292501	37	19	34	32	6	17
AAGCAATTGATTTGCATTCAATAGATGTAGGATGAAGTC,mature-mt_tRNA-Ala-TGC	-1.8128	0.653302	1	1	0	0	0	0
AAGCAATTGATTTGCATTCAATAGATGTAGGATGAAGTCT,mature-mt_tRNA-Ala-TGC	-0.209471	0.956756	0	0	2	2	0	0
AAGCAATTGATTTGCATTCAATAGATGTAGGATGAAGTCTT,mature-mt_tRNA-Ala-TGC	-2.71922	0.457784	0	1	3	0	0	0
AAGCAATTGATTTGCATTCAATAGATGTAGGATGAAGTCTTACAG,mature-mt_tRNA-Ala-TGC	1.03442	0.799879	0	0	0	0	0	1
AAGCAGTTGACCCGG,mature-tRNA-Gly-TCC	-0.735213	0.713189	3	1	4	0	0	4
AAGCAGTTGACCCGGG,mature-tRNA-Gly-TCC	1.11639	0.56472	0	5	0	8	1	2
AAGCAGTTGACCCGGGT,mature-tRNA-Gly-TCC	-0.127255	0.960233	3	0	1	5	0	0
AAGCAGTTGACCCGGGTT,mature-tRNA-Gly-TCC	1.03442	0.799879	0	0	0	0	0	1
AAGCAGTTGACCCGGGTTC,mature-tRNA-Gly-TCC	1.8723	0.539874	1	0	0	2	2	0
AAGCAGTTGACCCGGGTTCG,mature-tRNA-Gly-TCC	-1.6517	0.683455	0	2	0	0	0	0
AAGCAGTTGACCCGGGTTCGA,mature-tRNA-Gly-TCC	1.03442	0.799879	0	0	0	0	1	0
AAGCAGTTGACCCGGGTTCGATTC,mature-tRNA-Gly-TCC	3.69246	0.247607	0	0	0	0	6	0
AAGCAGTTGACCCGGGTTCGATTCCCGGCCAACG,mature-tRNA-Gly-TCC	-0.661581	0.749523	1	3	2	3	0	1
AAGCAGTTGACCCGGGTTCGATTCCCGGCCAACGCA,mature-tRNA-Gly-TCC_3_end	-0.889136	0.827507	1	0	0	0	0	0
AAGCAGTTGACCCGGGTTCGATTCCCGGCCAACGCACC,mature-tRNA-Gly-TCC	-2.73158	0.453927	1	3	0	0	0	0
AAGCAGTTGACCCGGGTTCGATTCCCGGCCAACGCACCA,mature-tRNA-Gly-TCC_CCA_end	-2.8755	0.255842	0	7	2	1	0	0
AAGCATCTGGCCTAC,mature-mt_tRNA-Val-TAC	-2.4072	0.5454	1	0	2	0	0	0
AAGCATCTGGCCTACACC,mature-mt_tRNA-Val-TAC	-0.0574677	0.983936	0	0	4	0	0	3
AAGCATCTGGCCTACACCC,mature-mt_tRNA-Val-TAC	-2.19632	0.446821	2	0	3	1	0	0
AAGCATCTGGCCTACACCCA,mature-mt_tRNA-Val-TAC	1.13287	0.774141	0	0	1	3	0	0
AAGCATCTGGCCTACACCCAGAAGA,mature-mt_tRNA-Val-TAC	-0.889136	0.827507	0	1	0	0	0	0
AAGCATCTGGCCTACACCCAGAAGATTT,mature-mt_tRNA-Val-TAC	-0.673803	0.759735	0	2	6	6	0	0
AAGCATCTGGCCTACACCCAGAAGATTTC,mature-mt_tRNA-Val-TAC	-0.787129	0.822421	0	0	3	2	0	0
AAGCATCTGGCCTACACCCAGAAGATTTCATG,mature-mt_tRNA-Val-TAC	0.133801	0.895696	7	5	9	14	5	5
AAGCATCTGGCCTACACCCAGAAGATTTCATGA,mature-mt_tRNA-Val-TAC	1.97298	0.409907	0	3	0	14	0	0
AAGCATCTGGCCTACACCCAGAAGATTTCATGAC,mature-mt_tRNA-Val-TAC	-0.197319	0.881352	4	4	5	5	1	5
AAGCATCTGGCCTACACCCAGAAGATTTCATGACC,mature-mt_tRNA-Val-TAC	-0.10232	0.913995	11	8	12	12	3	13
AAGCATCTGGCCTACACCCAGAAGATTTCATGACCA,mature-mt_tRNA-Val-TAC	-2.11102	0.305871	2	3	5	0	2	0
AAGCATCTGGCCTACACCCAGAAGATTTCATGACCAA,mature-mt_tRNA-Val-TAC	-0.889136	0.827507	0	0	1	0	0	0
AAGCATCTGGCCTACACCCAGAAGATTTCATGACCAATGAACA,mature-mt_tRNA-Val-TAC	-0.889136	0.827507	0	0	1	0	0	0
AAGCATCTGGCCTACACCCAGAAGATTTCATGACCAATGAACACT,mature-mt_tRNA-Val-TAC	-1.746	0.665753	0	0	2	0	0	0
AAGCATTAGACTGTA,mature-mt_tRNA-Tyr-GTA	-2.79359	0.208568	3	0	9	2	0	0
AAGCATTAGACTGTAA,mature-mt_tRNA-Tyr-GTA	3.47966	0.252571	0	0	0	0	2	3
AAGCATTAGACTGTAAATCT,mature-mt_tRNA-Tyr-GTA	-0.28965	0.929726	0	0	3	3	0	0
AAGCATTAGACTGTAAATCTA,mature-mt_tRNA-Tyr-GTA	1.03442	0.799879	0	0	0	0	1	0
AAGCATTAGACTGTAAATCTAAAC,mature-mt_tRNA-Tyr-GTA	4.11565	0.0843819	0	0	0	6	2	2
AAGCATTAGACTGTAAATCTAAACAC,mature-mt_tRNA-Tyr-GTA	1.74843	0.584789	0	1	0	0	2	1
AAGCATTAGACTGTAAATCTAAACACAGA,mature-mt_tRNA-Tyr-GTA	-0.889136	0.827507	1	0	0	0	0	0
AAGCATTAGACTGTAAATCTAAACACAGAGG,mature-mt_tRNA-Tyr-GTA	-1.41558	0.651923	0	5	0	2	0	0
AAGCATTAGACTGTAAATCTAAACACAGAGGT,mature-mt_tRNA-Tyr-GTA	-2.8935	0.406866	3	1	0	0	0	0
AAGCATTAGACTGTAAATCTAAACACAGAGGTT,mature-mt_tRNA-Tyr-GTA	-0.0159943	0.989888	6	3	6	13	3	1
AAGCATTAGACTGTAAATCTAAACACAGAGGTTT,mature-mt_tRNA-Tyr-GTA	-1.17353	0.1713	20	16	22	4	10	9
AAGCATTAGACTGTAAATCTAAACACAGAGGTTTA,mature-mt_tRNA-Tyr-GTA	-1.05603	0.61208	0	3	4	1	1	1
AAGCATTAGACTGTAAATCTAAACACAGAGGTTTAA,mature-mt_tRNA-Tyr-GTA	-0.889136	0.827507	0	1	0	0	0	0
AAGCATTAGACTGTAAATCTAAACACAGAGGTTTAAA,mature-mt_tRNA-Tyr-GTA	-2.5541	0.521517	3	0	0	0	0	0
AAGCCAGGGATTGTG,mature-tRNA-Arg-CCT	0.0726449	0.985796	0	1	0	0	0	1
AAGCCAGGGATTGTGG,mature-tRNA-Arg-CCT	-3.53092	0.192905	1	4	2	0	0	0
AAGCCAGGGATTGTGGGT,mature-tRNA-Arg-CCT	2.49607	0.532374	0	0	0	4	0	0
AAGCCAGGGATTGTGGGTTC,mature-tRNA-Arg-CCT	1.03442	0.799879	0	0	0	0	1	0
AAGCCAGGGATTGTGGGTTCG,mature-tRNA-Arg-CCT	-2.23023	0.577509	0	3	0	0	0	0
AAGCCAGGGATTGTGGGTTCGA,mature-tRNA-Arg-CCT	0.816949	0.754885	0	3	0	0	2	2
AAGCCAGGGATTGTGGGTTCGAG,mature-tRNA-Arg-CCT	1.03442	0.799879	0	0	0	0	0	1
AAGCCAGGGATTGTGGGTTCGAGTCCCACCCGGGGTACCA,mature-tRNA-Arg-CCT_CCA_end	1.03442	0.799879	0	0	0	0	0	1
AAGCCAGGGATTGTGGGTTCGAGTCCCACCTGGGG,mature-tRNA-Arg-CCT	3.46987	0.253621	0	0	0	3	0	3
AAGCCAGGGATTGTGGGTTCGAGTCCCACCTGGGGTACC,mature-tRNA-Arg-CCT	1.03442	0.799879	0	0	0	1	0	0
AAGCCAGGGATTGTGGGTTCGAGTCCCAT,mature-tRNA-Arg-CCT	1.03442	0.799879	0	0	0	0	1	0
AAGCCAGGGATTGTGGGTTCGAGTCCCATC,mature-tRNA-Arg-CCT	-2.32895	0.560157	0	0	3	0	0	0
AAGCCAGGGATTGTGGGTTCGAGTCCCATCTGGGG,mature-tRNA-Arg-CCT	-2.32895	0.560157	0	0	3	0	0	0
AAGCCAGGGATTGTGGGTTCGAGTCCCATCTGGGGTGC,mature-tRNA-Arg-CCT	2.09257	0.603263	0	0	0	3	0	0
AAGCCAGGGATTGTGGGTTCGAGTCCCATCTGGGGTGCC,mature-tRNA-Arg-CCT	-2.32895	0.560157	0	0	3	0	0	0
AAGCCAGGGATTGTGGGTTCGAGTCCCATCTGGGGTGCCA,mature-tRNA-Arg-CCT_CCA_end	-0.209471	0.956756	0	0	2	2	0	0
AAGCCAGTAATAGGG,mature-mt_tRNA-Asn-GTT	1.03442	0.799879	0	0	0	0	0	1
AAGCCAGTAATAGGGTATTTAGCTGTTAACTAAATT,mature-mt_tRNA-Asn-GTT	-0.889136	0.827507	0	0	1	0	0	0
AAGCCCTAAGAAAACAC,mature-mt_tRNA-Trp-TCA	2.09872	0.602152	0	0	0	0	2	0
AAGCCCTAAGAAAACACA,mature-mt_tRNA-Trp-TCA	2.09257	0.603263	0	0	0	3	0	0
AAGCCCTCTTATTTC,mature-mt_tRNA-Ile-GAT	-2.5541	0.521517	3	0	0	0	0	0
AAGCCCTCTTATTTCT,mature-mt_tRNA-Ile-GAT	1.92428	0.392709	1	0	1	4	4	0
AAGCCCTCTTATTTCTA,mature-mt_tRNA-Ile-GAT_3_end	2.57903	0.505223	0	0	0	1	0	2
AAGCCCTCTTATTTCTAC,mature-mt_tRNA-Ile-GAT	2.19886	0.148143	5	0	0	11	12	2
AAGCCCTCTTATTTCTACC,mature-mt_tRNA-Ile-GAT	1.29953	0.0622287	82	38	28	117	203	39
AAGCCCTCTTATTTCTACCA,mature-mt_tRNA-Ile-GAT_CCA_end	1.764	0.00427209	147	239	185	306	1084	298
AAGCGAAAGGTCCCCGGT,mature-tRNA-Gly-ACC	1.03442	0.799879	0	0	0	1	0	0
AAGCGATGCCGAGGTTGTGAGTTC,pre-tRNA-Ile-TAT	-1.746	0.665753	0	0	2	0	0	0
AAGCGATGCCGAGGTTGTGAGTTCGATCCT,pre-tRNA-Ile-TAT	2.69004	0.499796	0	0	0	0	3	0
AAGCGCCTGTCTAGTAAACAGGAGATCCTGGGTTCGA,mature-tRNA-Thr-AGT	-0.889136	0.827507	0	1	0	0	0	0
AAGCGCCTGTCTCGTAAACAGGAGATCCTGG,mature-tRNA-Thr-CGT	-3.55747	0.272426	6	0	0	0	0	0
AAGCGTGCTGGGCCC,mature-tRNA-iMet-CAT	1.60032	0.576053	0	0	2	0	5	0
AAGCGTGCTGGGCCCATA,mature-tRNA-iMet-CAT	-0.889136	0.827507	0	1	0	0	0	0
AAGCGTGCTGGGCCCATAACCCAGAGG,mature-tRNA-iMet-CAT	-1.746	0.665753	0	0	2	0	0	0
AAGCGTGCTGGGCCCATAACCCAGAGGTCG,mature-tRNA-iMet-CAT	-1.6517	0.683455	0	2	0	0	0	0
AAGCGTGCTGGGCCCATAACCCAGAGGTCGATGG,mature-tRNA-iMet-CAT	-0.889136	0.827507	0	1	0	0	0	0
AAGCGTGCTGGGCCCATAACCCAGAGGTCGATGGAT,mature-tRNA-iMet-CAT	1.03442	0.799879	0	0	0	0	0	1
AAGCGTGCTGGGCCCATAACCCAGAGGTCGATGGATCGA,mature-tRNA-iMet-CAT	-0.889136	0.827507	1	0	0	0	0	0
AAGCTAAGAGCGTTAACC,mature-mt_tRNA-Lys-TTT	2.69004	0.499796	0	0	0	0	3	0
AAGCTAAGAGCGTTAACCT,mature-mt_tRNA-Lys-TTT	3.19653	0.37532	0	0	0	0	0	4
AAGCTAAGAGCGTTAACCTTTTA,mature-mt_tRNA-Lys-TTT	-1.6517	0.683455	0	2	0	0	0	0
AAGCTAAGAGCGTTAACCTTTTAAGTTAAAGTT,mature-mt_tRNA-Lys-TTT	-0.889136	0.827507	0	1	0	0	0	0
AAGCTAAGAGCGTTAACCTTTTAAGTTAAAGTTAG,mature-mt_tRNA-Lys-TTT	1.60709	0.692322	0	0	0	2	0	0
AAGCTATCGGGCCCATACCCCGAA,mature-mt_tRNA-Met-CAT	-0.889136	0.827507	1	0	0	0	0	0
AAGCTATCGGGCCCATACCCCGAAAACGTT,mature-mt_tRNA-Met-CAT	0.217905	0.934218	0	2	1	1	0	2
AAGCTATCGGGCCCATACCCCGAAAACGTTG,mature-mt_tRNA-Met-CAT	1.03442	0.799879	0	0	0	1	0	0
AAGCTATCGGGCCCATACCCCGAAAACGTTGG,mature-mt_tRNA-Met-CAT	-0.77347	0.667801	3	6	0	2	2	1
AAGCTATCGGGCCCATACCCCGAAAACGTTGGT,mature-mt_tRNA-Met-CAT	-1.77758	0.240753	4	4	7	1	1	2
AAGCTATCGGGCCCATACCCCGAAAACGTTGGTT,mature-mt_tRNA-Met-CAT	0.426747	0.835321	2	0	2	4	1	1
AAGCTATCGGGCCCATACCCCGAAAACGTTGGTTT,mature-mt_tRNA-Met-CAT	0.189092	0.885984	7	1	6	15	3	1
AAGCTATCGGGCCCATACCCCGAAAACGTTGGTTTA,mature-mt_tRNA-Met-CAT	-0.248696	0.934562	0	1	2	3	0	0
AAGCTATCGGGCCCATACCCCGAAAACGTTGGTTTAA,mature-mt_tRNA-Met-CAT	-2.86013	0.41412	2	0	2	0	0	0
AAGCTATCGGGCCCATACCCCGAAAACGTTGGTTTAAA,mature-mt_tRNA-Met-CAT	-1.36777	0.716888	0	0	3	1	0	0
AAGCTATCGGGCCCATACCCCGAAAACGTTGGTTTAAAT,mature-mt_tRNA-Met-CAT	1.21871	0.746427	1	0	0	0	0	2
AAGCTATCGGGCCCATACCCCGAAAACGTTGGTTTAAATCCTT,mature-mt_tRNA-Met-CAT	-1.746	0.665753	0	0	2	0	0	0
AAGCTATCGGGCCCATACCCCGAAAACGTTGGTTTAAATCCTTC,mature-mt_tRNA-Met-CAT	-0.889136	0.827507	0	0	1	0	0	0
AAGGCACTGGCCTCCTAAGCCAGGGATTGTGGGTTC,mature-tRNA-Arg-CCT	1.03442	0.799879	0	0	0	0	1	0
AAGGCATTGGCCTCCTAAG,mature-tRNA-Arg-CCT	1.03442	0.799879	0	0	0	0	0	1
AAGGCATTGGCCTCCTAAGCCAGGGATTG,mature-tRNA-Arg-CCT	-2.32895	0.560157	0	0	3	0	0	0
AAGGCGATGGACTAGAAATCCATTGGGG,mature-tRNA-Ser-AGA	-0.889136	0.827507	0	0	1	0	0	0
AAGGCGCCAGACTCAAG,mature-tRNA-Leu-CAA	2.35579	0.396773	1	0	0	4	2	0
AAGGCGCCAGACTCAAGC,pre-tRNA-Leu-CAA	2.09257	0.603263	0	0	0	3	0	0
AAGGCGCCAGACTCAAGCT,pre-tRNA-Leu-CAA	-1.96161	0.625864	2	0	0	0	0	0
AAGGCGCCAGACTCAAGCTT,pre-tRNA-Leu-CAA	1.60709	0.692322	0	0	0	2	0	0
AAGGCGCCAGACTCAAGCTTAGCTTCCCTGTCTGGGG,pre-tRNA-Leu-CAA	1.03442	0.799879	0	0	0	0	0	1
AAGGCGCCAGACTCAAGGTG,pre-tRNA-Leu-CAA	-2.23023	0.577509	0	3	0	0	0	0
AAGGCGCCAGACTCAAGGTGACAAGCCTT,pre-tRNA-Leu-CAA	1.60709	0.692322	0	0	0	2	0	0
AAGGCGCTGGATTAAGGCTCCAGTC,mature-tRNA-Leu-AAG	2.78009	0.485032	0	0	0	0	0	3
AAGGCGTTGGACTTGAAATCCAATGGGGTC,mature-tRNA-Ser-TGA	-2.32895	0.560157	0	0	3	0	0	0
AAGGCTGCGTGTTCG,mature-tRNA-Trp-CCA	1.67875	0.534096	2	0	0	0	6	0
AAGGCTGCGTGTTCGA,mature-tRNA-Trp-CCA	-3.04588	0.364986	0	1	4	0	0	0
AAGGCTGCGTGTTCGAA,mature-tRNA-Trp-CCA	-2.66912	0.472238	0	3	1	0	0	0
AAGGCTGCGTGTTCGAAT,mature-tRNA-Trp-CCA	-3.31203	0.292548	0	1	5	0	0	0
AAGGCTGCGTGTTCGAATCAC,mature-tRNA-Trp-CCA	1.03442	0.799879	0	0	0	0	0	1
AAGGCTGCGTGTTCGAATCACGTC,mature-tRNA-Trp-CCA	1.03442	0.799879	0	0	0	0	1	0
AAGGCTGCGTGTTCGAATCACGTCGG,mature-tRNA-Trp-CCA	-0.889136	0.827507	0	1	0	0	0	0
AAGGCTGCGTGTTCGAATCACGTCGGGG,mature-tRNA-Trp-CCA	-1.18807	0.583505	0	8	2	5	0	0
AAGGCTGCGTGTTCGAATCACGTCGGGGT,mature-tRNA-Trp-CCA	-1.63163	0.344417	1	8	4	2	2	0
AAGGCTGCGTGTTCGAATCACGTCGGGGTC,mature-tRNA-Trp-CCA	-0.889136	0.827507	0	0	1	0	0	0
AAGGCTGCGTGTTCGAATCACGTCGGGGTCAC,mature-tRNA-Trp-CCA	2.49607	0.532374	0	0	0	4	0	0
AAGGCTGCGTGTTCGAATCACGTCGGGGTCACC,mature-tRNA-Trp-CCA	-0.13482	0.947332	0	5	2	0	4	1
AAGGCTGCGTGTTCGAATCACGTCGGGGTCACCA,mature-tRNA-Trp-CCA_CCA_end	-1.03163	0.631605	0	11	0	0	1	3
AAGGTCAGCTAATTA,mature-mt_tRNA-Met-CAT	-0.564494	0.856852	0	0	3	1	1	0
AAGGTCAGCTAATTAAG,mature-mt_tRNA-Met-CAT	0.190601	0.898818	0	5	10	8	0	8
AAGGTCAGCTAATTAAGC,mature-mt_tRNA-Met-CAT	3.25522	0.148835	0	0	1	10	1	1
AAGGTCAGCTAATTAAGCT,mature-mt_tRNA-Met-CAT	1.48039	0.546004	1	1	0	4	0	2
AAGGTCAGCTAATTAAGCTATC,mature-mt_tRNA-Met-CAT	-0.999826	0.803743	2	0	0	1	0	0
AAGGTCAGCTAATTAAGCTATCGGG,mature-mt_tRNA-Met-CAT	3.80649	0.222091	0	0	0	10	0	0
AAGGTCAGCTAATTAAGCTATCGGGC,mature-mt_tRNA-Met-CAT	-3.4474	0.301577	0	7	0	0	0	0
AAGGTCAGCTAATTAAGCTATCGGGCC,mature-mt_tRNA-Met-CAT	1.60709	0.692322	0	0	0	2	0	0
AAGGTCAGCTAATTAAGCTATCGGGCCC,mature-mt_tRNA-Met-CAT	-0.303736	0.866257	7	1	2	11	0	0
AAGGTCAGCTAATTAAGCTATCGGGCCCA,mature-mt_tRNA-Met-CAT	-0.889136	0.827507	0	0	1	0	0	0
AAGGTCAGCTAATTAAGCTATCGGGCCCATA,mature-mt_tRNA-Met-CAT	2.09872	0.602152	0	0	0	0	2	0
AAGGTCAGCTAATTAAGCTATCGGGCCCATACCCCGA,mature-mt_tRNA-Met-CAT	-0.700548	0.80444	2	0	1	1	1	0
AAGGTCAGCTAATTAAGCTATCGGGCCCATACCCCGAA,mature-mt_tRNA-Met-CAT	-0.26949	0.907289	1	2	1	1	0	2
AAGGTCAGCTAATTAAGCTATCGGGCCCATACCCCGAAA,mature-mt_tRNA-Met-CAT	1.03442	0.799879	0	0	0	1	0	0
AAGGTCAGCTAATTAAGCTATCGGGCCCATACCCCGAAAAC,mature-mt_tRNA-Met-CAT	-0.889136	0.827507	0	0	1	0	0	0
AAGGTCAGCTAATTAAGCTATCGGGCCCATACCCCGAAAACGT,mature-mt_tRNA-Met-CAT	-0.889136	0.827507	1	0	0	0	0	0
AAGGTCAGCTAATTAAGCTATCGGGCCCATACCCCGAAAACGTT,mature-mt_tRNA-Met-CAT	-0.784428	0.843683	0	0	2	0	0	1
AAGGTCCCCGGTTCG,mature-tRNA-Val-CAC;mature-tRNA-Val-AAC;mature-tRNA-Gly-ACC	-0.91223	0.568543	5	6	2	1	0	5
AAGGTCCCCGGTTCGA,mature-tRNA-Val-CAC;mature-tRNA-Val-AAC;mature-tRNA-Gly-ACC	-0.518908	0.746532	0	10	5	6	0	4
AAGGTCCCCGGTTCGAA,mature-tRNA-Val-CAC;mature-tRNA-Val-AAC;mature-tRNA-Gly-ACC	0.363185	0.87109	0	6	0	1	0	5
AAGGTCCCCGGTTCGAAAC,mature-tRNA-Val-CAC;mature-tRNA-Val-AAC;mature-tRNA-Gly-ACC	-1.746	0.665753	0	0	2	0	0	0
AAGGTCCCCGGTTCGAAACC,mature-tRNA-Val-CAC;mature-tRNA-Val-AAC;mature-tRNA-Gly-ACC	1.03442	0.799879	0	0	0	0	0	1
AAGGTCCCCGGTTCGAAACCGGGCGG,mature-tRNA-Val-CAC;mature-tRNA-Val-AAC;mature-tRNA-Gly-ACC	0.520089	0.862927	0	3	0	5	0	0
AAGGTCCCCGGTTCGAAACCGGGCGGA,mature-tRNA-Val-CAC;mature-tRNA-Val-AAC;mature-tRNA-Gly-ACC	0.171483	0.919073	1	2	6	11	1	0
AAGGTCCCCGGTTCGAAACCGGGCGGAA,mature-tRNA-Val-CAC;mature-tRNA-Val-AAC;mature-tRNA-Gly-ACC	-1.76149	0.446976	4	0	4	3	0	0
AAGGTCCCCGGTTCGAAACCGGGCGGAAA,mature-tRNA-Val-CAC;mature-tRNA-Val-AAC;mature-tRNA-Gly-ACC	0.358404	0.856136	3	2	1	10	0	0
AAGGTCCCCGGTTCGAAACCGGGCGGAAAC,mature-tRNA-Val-CAC;mature-tRNA-Val-AAC;mature-tRNA-Gly-ACC	-0.271264	0.850652	5	4	2	7	1	2
AAGGTCCCCGGTTCGAAACCGGGCGGAAACA,mature-tRNA-Val-CAC_3_end;mature-tRNA-Val-AAC_3_end;mature-tRNA-Gly-ACC_3_end	-0.220075	0.852279	13	4	9	20	0	6
AAGGTCCCCGGTTCGAAACCGGGCGGAAACAC,mature-tRNA-Val-CAC;mature-tRNA-Val-AAC;mature-tRNA-Gly-ACC	1.13435	0.641644	0	0	4	11	0	0
AAGGTCCCCGGTTCGAAACCGGGCGGAAACACC,mature-tRNA-Val-CAC;mature-tRNA-Val-AAC;mature-tRNA-Gly-ACC	0.672622	0.719024	0	3	3	4	5	0
AAGGTCCCCGGTTCGAAACCGGGCGGAAACACCA,mature-tRNA-Val-CAC_CCA_end;mature-tRNA-Val-AAC_CCA_end;mature-tRNA-Gly-ACC_CCA_end	-0.311394	0.803655	0	9	16	15	3	3
AAGGTCCCTGGTTCAATCCCGGGTTTCGGCAC,mature-tRNA-Phe-GAA	1.03442	0.799879	0	0	0	0	0	1
AAGGTCCCTGGTTCAATCCCGGGTTTCGGCACC,mature-tRNA-Phe-GAA	-2.66912	0.472238	0	3	1	0	0	0
AAGGTCCCTGGTTCAATCCCGGGTTTCGGCACCA,mature-tRNA-Phe-GAA_CCA_end	-0.889136	0.827507	0	1	0	0	0	0
AAGGTCCCTGGTTCG,mature-tRNA-Phe-GAA	-1.6517	0.683455	0	2	0	0	0	0
AAGGTCCCTGGTTCGAT,mature-tRNA-Phe-GAA	2.14243	0.594294	0	0	0	0	1	1
AAGGTCCCTGGTTCGATCCC,mature-tRNA-Phe-GAA	2.14243	0.594294	0	0	0	0	1	1
AAGGTCCCTGGTTCGATCCCGG,mature-tRNA-Phe-GAA	1.03442	0.799879	0	0	0	0	0	1
AAGGTCCCTGGTTCGATCCCGGGT,mature-tRNA-Phe-GAA	-1.746	0.665753	0	0	2	0	0	0
AAGGTCCCTGGTTCGATCCCGGGTTTCG,mature-tRNA-Phe-GAA	-0.889136	0.827507	0	0	1	0	0	0
AAGGTCCCTGGTTCGATCCCGGGTTTCGG,mature-tRNA-Phe-GAA	0.540137	0.790459	2	0	3	8	1	0
AAGGTCCCTGGTTCGATCCCGGGTTTCGGC,mature-tRNA-Phe-GAA	2.77739	0.277777	1	0	0	3	0	4
AAGGTCCCTGGTTCGATCCCGGGTTTCGGCA,mature-tRNA-Phe-GAA_3_end	-0.945644	0.63811	10	1	0	8	0	0
AAGGTCCCTGGTTCGATCCCGGGTTTCGGCAC,mature-tRNA-Phe-GAA	1.52771	0.425017	1	0	2	5	2	2
AAGGTCCCTGGTTCGATCCCGGGTTTCGGCACC,mature-tRNA-Phe-GAA	-1.75543	0.257912	9	6	5	0	0	5
AAGGTCCCTGGTTCGATCCCGGGTTTCGGCACCA,mature-tRNA-Phe-GAA_CCA_end	-0.369409	0.727709	10	7	10	5	2	12
AAGGTCCTGAGTTCGAAC,mature-tRNA-Met-CAT	-2.96253	0.433114	0	5	0	0	0	0
AAGGTCCTGAGTTCGAACC,mature-tRNA-Met-CAT	2.25049	0.432046	0	0	1	2	3	0
AAGGTCCTGAGTTCGAACCT,mature-tRNA-Met-CAT	0.948145	0.659141	0	1	3	0	1	5
AAGGTCCTGAGTTCGAACCTC,mature-tRNA-Met-CAT	-1.30722	0.695038	0	2	1	0	0	1
AAGGTCCTGAGTTCGAACCTCA,mature-tRNA-Met-CAT	2.69004	0.499796	0	0	0	0	3	0
AAGGTCCTGAGTTCGAACCTCAGA,mature-tRNA-Met-CAT	1.03442	0.799879	0	0	0	0	1	0
AAGGTCCTGAGTTCGAACCTCAGAGAG,mature-tRNA-Met-CAT	2.09872	0.602152	0	0	0	0	2	0
AAGGTCCTGAGTTCGAACCTCAGAGAGG,mature-tRNA-Met-CAT	1.03442	0.799879	0	0	0	1	0	0
AAGGTCCTGAGTTCGAACCTCAGAGAGGG,mature-tRNA-Met-CAT	3.91523	0.196778	0	0	0	0	7	0
AAGGTCCTGAGTTCGAACCTCAGAGAGGGCA,mature-tRNA-Met-CAT_3_end	-0.889136	0.827507	1	0	0	0	0	0
AAGGTCCTGAGTTCGAACCTCAGAGGG,mature-tRNA-Met-CAT	-2.64177	0.506839	0	4	0	0	0	0
AAGGTCCTGAGTTCGAACCTCAGAGGGG,mature-tRNA-Met-CAT	0.576164	0.671201	2	7	1	6	5	3
AAGGTCCTGAGTTCGAACCTCAGAGGGGG,mature-tRNA-Met-CAT	-0.956464	0.605529	1	4	4	1	0	3
AAGGTCCTGAGTTCGAACCTCAGAGGGGGC,mature-tRNA-Met-CAT	-2.32895	0.560157	0	0	3	0	0	0
AAGGTCCTGAGTTCGAACCTCAGAGGGGGCAC,mature-tRNA-Met-CAT	1.03442	0.799879	0	0	0	0	1	0
AAGGTCCTGAGTTCGAACCTCAGAGGGGGCACC,mature-tRNA-Met-CAT	-1.68448	0.62164	0	4	0	0	1	0
AAGGTCCTGAGTTCGAACCTCAGAGGGGGCACCA,mature-tRNA-Met-CAT_CCA_end	-0.858038	0.701427	0	6	1	0	2	1
AAGGTCCTGGGTTCG,mature-tRNA-Val-TAC	0.699767	0.75141	0	2	2	0	1	4
AAGGTCCTGGGTTCGAG,mature-tRNA-Val-TAC	-2.09658	0.435269	1	3	1	0	1	0
AAGGTCCTGGGTTCGAGC,mature-tRNA-Val-TAC	-1.6517	0.683455	0	2	0	0	0	0
AAGGTCCTGGGTTCGAGCC,mature-tRNA-Val-TAC	-0.889136	0.827507	0	1	0	0	0	0
AAGGTCCTGGGTTCGAGCCCC,mature-tRNA-Val-TAC	0.0726449	0.985796	0	1	0	0	0	1
AAGGTCCTGGGTTCGAGCCCCAGTGG,mature-tRNA-Val-TAC	-1.84049	0.544865	1	0	3	0	1	0
AAGGTCCTGGGTTCGAGCCCCAGTGGAA,mature-tRNA-Val-TAC	-0.544638	0.774858	0	2	7	3	3	0
AAGGTCCTGGGTTCGAGCCCCAGTGGAAC,mature-tRNA-Val-TAC	-1.68333	0.633769	0	4	0	1	0	0
AAGGTCCTGGGTTCGAGCCCCAGTGGAACC,mature-tRNA-Val-TAC	0.517522	0.604526	2	8	12	11	10	8
AAGGTCCTGGGTTCGAGCCCCAGTGGAACCA,mature-tRNA-Val-TAC_3_end	0.344133	0.867646	2	3	0	5	2	0
AAGGTCCTGGGTTCGAGCCCCAGTGGAACCAC,mature-tRNA-Val-TAC	2.49607	0.532374	0	0	0	4	0	0
AAGGTCCTGGGTTCGAGCCCCAGTGGAACCACC,mature-tRNA-Val-TAC	-1.26493	0.165237	15	24	11	15	3	4
AAGGTCCTGGGTTCGAGCCCCAGTGGAACCACCA,mature-tRNA-Val-TAC_CCA_end	-1.5677	0.194461	7	4	15	5	3	1
AAGGTCGCGGGTTCG,mature-tRNA-Ile-AAT	0.509462	0.674051	1	10	5	3	11	5
AAGGTCGCGGGTTCGA,mature-tRNA-Ile-AAT	-1.48466	0.351593	0	16	5	4	0	3
AAGGTCGCGGGTTCGAT,mature-tRNA-Ile-AAT	1.22496	0.440202	2	4	1	0	3	10
AAGGTCGCGGGTTCGATC,mature-tRNA-Ile-AAT	1.60709	0.692322	0	0	0	2	0	0
AAGGTCGCGGGTTCGATCC,mature-tRNA-Ile-AAT	1.21648	0.584332	0	0	4	1	7	0
AAGGTCGCGGGTTCGATCCC,mature-tRNA-Ile-AAT	0.203947	0.920685	1	5	0	2	0	4
AAGGTCGCGGGTTCGATCCCC,mature-tRNA-Ile-AAT	3.22126	0.326106	0	0	0	5	0	1
AAGGTCGCGGGTTCGATCCCCG,mature-tRNA-Ile-AAT	-3.49541	0.12826	0	13	1	0	0	1
AAGGTCGCGGGTTCGATCCCCGT,mature-tRNA-Ile-AAT	0.666343	0.639036	2	2	5	1	4	7
AAGGTCGCGGGTTCGATCCCCGTA,mature-tRNA-Ile-AAT	0.366309	0.553635	47	318	130	186	226	148
AAGGTCGCGGGTTCGATCCCCGTAC,mature-tRNA-Ile-AAT	2.37788	0.304751	0	2	0	0	5	3
AAGGTCGCGGGTTCGATCCCCGTACG,mature-tRNA-Ile-AAT	0.470131	0.812168	0	5	1	5	0	3
AAGGTCGCGGGTTCGATCCCCGTACGG,mature-tRNA-Ile-AAT	-1.94905	0.300282	2	13	0	3	1	0
AAGGTCGCGGGTTCGATCCCCGTACGGG,mature-tRNA-Ile-AAT	0.846967	0.221067	16	22	12	34	33	19
AAGGTCGCGGGTTCGATCCCCGTACGGGC,mature-tRNA-Ile-AAT	-1.36826	0.705187	0	0	3	0	1	0
AAGGTCGCGGGTTCGATCCCCGTACGGGCC,mature-tRNA-Ile-AAT	0.804484	0.66316	1	2	2	0	2	5
AAGGTCGCGGGTTCGATCCCCGTACGGGCCAC,mature-tRNA-Ile-AAT	-1.88317	0.396182	1	7	1	0	2	0
AAGGTCGCGGGTTCGATCCCCGTACGGGCCACC,mature-tRNA-Ile-AAT	-0.920704	0.588742	1	12	1	7	0	1
AAGGTCGCGGGTTCGATCCCCGTACGGGCCACCA,mature-tRNA-Ile-AAT_CCA_end	-1.36505	0.266901	2	17	7	3	4	2
AAGGTCGTGAGTTCG,mature-tRNA-Met-CAT	-1.6517	0.683455	0	2	0	0	0	0
AAGGTCGTGAGTTCGAT,mature-tRNA-Met-CAT	-0.889136	0.827507	0	1	0	0	0	0
AAGGTCGTGAGTTCGATCCTCACA,mature-tRNA-Met-CAT	1.77607	0.57464	0	0	1	0	1	2
AAGGTCGTGAGTTCGATCCTCACACGG,mature-tRNA-Met-CAT	-2.86013	0.41412	2	0	2	0	0	0
AAGGTCGTGAGTTCGATCCTCACACGGG,mature-tRNA-Met-CAT	-0.98678	0.488102	2	11	9	0	8	1
AAGGTCGTGAGTTCGATCCTCACACGGGG,mature-tRNA-Met-CAT	0.265799	0.81226	2	12	5	12	3	7
AAGGTCGTGAGTTCGATCCTCACACGGGGC,mature-tRNA-Met-CAT	2.31491	0.563707	0	0	0	2	1	0
AAGGTCGTGAGTTCGATCCTCACACGGGGCA,mature-tRNA-Met-CAT_3_end	-0.889136	0.827507	0	1	0	0	0	0
AAGGTCGTGAGTTCGATCCTCACACGGGGCACC,mature-tRNA-Met-CAT	1.21871	0.746427	1	0	0	0	0	2
AAGGTCGTGAGTTCGATCCTCACACGGGGCACCA,mature-tRNA-Met-CAT_CCA_end	-1.27155	0.728213	0	3	0	0	0	1
AAGGTGATATTCATGTC,mature-mt_tRNA-Cys-GCA	-0.889136	0.827507	1	0	0	0	0	0
AAGGTGATATTCATGTCG,mature-mt_tRNA-Cys-GCA	1.03442	0.799879	0	0	0	0	1	0
AAGGTGATATTCATGTCGA,mature-mt_tRNA-Cys-GCA	0.86106	0.790148	0	0	2	0	3	0
AAGGTGATATTCATGTCGAA,mature-mt_tRNA-Cys-GCA	-1.8128	0.653302	1	1	0	0	0	0
AAGGTGATATTCATGTCGAATT,mature-mt_tRNA-Cys-GCA	-2.26727	0.458528	0	6	0	0	1	0
AAGGTGATATTCATGTCGAATTG,mature-mt_tRNA-Cys-GCA	1.57771	0.328194	0	5	2	0	8	8
AAGGTGATATTCATGTCGAATTGC,mature-mt_tRNA-Cys-GCA	-0.689922	0.864759	0	2	0	0	1	0
AAGGTGATATTCATGTCGAATTGCA,mature-mt_tRNA-Cys-GCA	-0.889136	0.827507	0	0	1	0	0	0
AAGGTGATATTCATGTCGAATTGCAA,mature-mt_tRNA-Cys-GCA	-1.69942	0.674478	0	1	1	0	0	0
AAGGTGATATTCATGTCGAATTGCAAATTCGAAGG,mature-mt_tRNA-Cys-GCA	-2.0863	0.473161	0	1	4	0	1	0
AAGGTGATATTCATGTCGAATTGCAAATTCGAAGGTG,mature-mt_tRNA-Cys-GCA	1.03442	0.799879	0	0	0	1	0	0
AAGGTGTAGAGAAAT,mature-mt_tRNA-Cys-GCA	-1.6517	0.683455	0	2	0	0	0	0
AAGGTGTAGAGAAATCT,mature-mt_tRNA-Cys-GCA	-0.999826	0.803743	2	0	0	1	0	0
AAGGTGTAGAGAAATCTCTACTAAGACT,mature-mt_tRNA-Cys-GCA	2.78009	0.485032	0	0	0	0	0	3
AAGGTGTAGAGAAATCTCTACTAAGACTT,mature-mt_tRNA-Cys-GCA_3_end	-0.418285	0.91051	2	0	0	2	0	0
AAGGTGTAGAGAAATCTCTACTAAGACTTCC,mature-mt_tRNA-Cys-GCA	-1.4127	0.651802	4	0	0	2	0	0
AAGGTGTAGAGAAATCTCTACTAAGACTTCCA,mature-mt_tRNA-Cys-GCA_CCA_end	-0.718802	0.560522	3	3	17	8	1	5
AAGGTGTTTAGGTAGCACGGA,mature-mt_tRNA-Gln-TTG	1.03442	0.799879	0	0	0	0	0	1
AAGGTGTTTAGGTAGCACGGAG,mature-mt_tRNA-Gln-TTG	1.84802	0.465255	0	2	0	4	3	0
AAGGTGTTTAGGTAGCACGGAGA,mature-mt_tRNA-Gln-TTG	-1.8128	0.653302	1	1	0	0	0	0
AAGGTGTTTAGGTAGCACGGAGAA,mature-mt_tRNA-Gln-TTG	-1.69942	0.674478	0	1	1	0	0	0
AAGGTGTTTAGGTAGCACGGAGAATT,mature-mt_tRNA-Gln-TTG	1.60709	0.692322	0	0	0	2	0	0
AAGGTGTTTAGGTAGCACGGAGAATTTTGAATTCTTA,mature-mt_tRNA-Gln-TTG	1.03442	0.799879	0	0	0	1	0	0
AAGGTTCCGGGTTCG,mature-tRNA-Arg-TCT	1.24757	0.580145	0	4	0	0	1	6
AAGGTTCCGGGTTCGA,mature-tRNA-Arg-TCT	3.462	0.257124	0	0	0	0	3	2
AAGGTTCCGGGTTCGAG,mature-tRNA-Arg-TCT	0.886934	0.706504	0	1	2	2	0	3
AAGGTTCCGGGTTCGAGT,mature-tRNA-Arg-TCT	-0.889136	0.827507	0	1	0	0	0	0
AAGGTTCCGGGTTCGAGTCCC,mature-tRNA-Arg-TCT	-1.746	0.665753	0	0	2	0	0	0
AAGGTTCCGGGTTCGAGTCCCGGCGGA,mature-tRNA-Arg-TCT	0.310238	0.885783	1	2	1	0	1	3
AAGGTTCCGGGTTCGAGTCCCGGCGGAG,mature-tRNA-Arg-TCT	1.13564	0.771483	0	0	1	0	2	0
AAGGTTCCGGGTTCGAGTCCCGGCGGAGT,mature-tRNA-Arg-TCT	0.839578	0.382279	2	10	10	22	10	7
AAGGTTCCGGGTTCGAGTCCCGGCGGAGTC,mature-tRNA-Arg-TCT	-1.05865	0.580424	1	7	1	2	0	2
AAGGTTCCGGGTTCGAGTCCCGGCGGAGTCG,mature-tRNA-Arg-TCT_3_end	-0.0165269	0.990218	1	4	9	6	1	6
AAGGTTCCGGGTTCGAGTCCCGGCGGAGTCGC,mature-tRNA-Arg-TCT	-0.906613	0.324348	7	25	12	10	4	8
AAGGTTCCGGGTTCGAGTCCCGGCGGAGTCGCC,mature-tRNA-Arg-TCT	0.129464	0.838298	21	44	26	51	21	26
AAGGTTCCGGGTTCGAGTCCCGGCGGAGTCGCCA,mature-tRNA-Arg-TCT_CCA_end	-0.369545	0.590561	23	46	45	15	28	33
AAGGTTGCGGGTTCGAGTCCCGCCAGAGTCGC,mature-tRNA-Arg-TCT	1.60709	0.692322	0	0	0	2	0	0
AAGGTTGCGGGTTCGAGTCCCGCCAGAGTCGCC,mature-tRNA-Arg-TCT	-0.889136	0.827507	1	0	0	0	0	0
AAGGTTGCGTGTTCA,mature-tRNA-Trp-CCA	0.0726449	0.985796	0	1	0	1	0	0
AAGGTTGCGTGTTCAA,mature-tRNA-Trp-CCA	1.60709	0.692322	0	0	0	2	0	0
AAGGTTGCGTGTTCAAATC,mature-tRNA-Trp-CCA	1.03442	0.799879	0	0	0	0	0	1
AAGGTTGCGTGTTCAAATCACGTC,mature-tRNA-Trp-CCA	-0.361507	0.895936	1	0	2	0	1	1
AAGGTTGCGTGTTCAAATCACGTCG,mature-tRNA-Trp-CCA	1.03442	0.799879	0	0	0	1	0	0
AAGGTTGCGTGTTCAAATCACGTCGGG,mature-tRNA-Trp-CCA	1.43633	0.499318	0	0	3	4	3	1
AAGGTTGCGTGTTCAAATCACGTCGGGG,mature-tRNA-Trp-CCA	0.142278	0.889063	6	11	6	9	12	3
AAGGTTGCGTGTTCAAATCACGTCGGGGT,mature-tRNA-Trp-CCA	-0.00464863	0.997312	0	10	5	4	6	3
AAGGTTGCGTGTTCAAATCACGTCGGGGTC,mature-tRNA-Trp-CCA	-1.63448	0.550364	3	0	2	2	0	0
AAGGTTGCGTGTTCAAATCACGTCGGGGTCA,mature-tRNA-Trp-CCA_3_end	-0.158617	0.9465	3	0	2	6	0	0
AAGGTTGCGTGTTCAAATCACGTCGGGGTCAC,mature-tRNA-Trp-CCA	-2.34488	0.55738	1	2	0	0	0	0
AAGGTTGCGTGTTCAAATCACGTCGGGGTCACC,mature-tRNA-Trp-CCA	-1.2467	0.172293	10	23	12	8	4	6
AAGGTTGCGTGTTCAAATCACGTCGGGGTCACCA,mature-tRNA-Trp-CCA_CCA_end	-0.0748818	0.948054	2	6	13	3	6	8
AAGGTTGCGTGTTCAAG,mature-tRNA-Trp-CCA	0.114411	0.970693	0	0	3	4	0	0
AAGGTTGCGTGTTCAAGTC,mature-tRNA-Trp-CCA	1.03442	0.799879	0	0	0	1	0	0
AAGGTTGCGTGTTCAAGTCA,mature-tRNA-Trp-CCA	1.03442	0.799879	0	0	0	0	1	0
AAGGTTGCGTGTTCAAGTCACGT,mature-tRNA-Trp-CCA	1.60709	0.692322	0	0	0	2	0	0
AAGGTTGCGTGTTCAAGTCACGTC,mature-tRNA-Trp-CCA	-2.5541	0.521517	3	0	0	0	0	0
AAGGTTGCGTGTTCAAGTCACGTCGGG,mature-tRNA-Trp-CCA	-0.0895566	0.957223	4	7	0	4	6	0
AAGGTTGCGTGTTCAAGTCACGTCGGGG,mature-tRNA-Trp-CCA	1.11202	0.306958	3	7	7	35	4	3
AAGGTTGCGTGTTCAAGTCACGTCGGGGT,mature-tRNA-Trp-CCA	-2.24391	0.0883111	8	17	5	6	1	0
AAGGTTGCGTGTTCAAGTCACGTCGGGGTC,mature-tRNA-Trp-CCA	3.43498	0.223546	0	0	0	3	2	1
AAGGTTGCGTGTTCAAGTCACGTCGGGGTCA,mature-tRNA-Trp-CCA_3_end	0.630598	0.823479	1	1	0	1	2	0
AAGGTTGCGTGTTCAAGTCACGTCGGGGTCAC,mature-tRNA-Trp-CCA	-2.64177	0.506839	0	4	0	0	0	0
AAGGTTGCGTGTTCAAGTCACGTCGGGGTCACC,mature-tRNA-Trp-CCA	-1.84051	0.178425	5	15	4	5	2	0
AAGGTTGCGTGTTCAAGTCACGTCGGGGTCACCA,mature-tRNA-Trp-CCA_CCA_end	0.933539	0.470902	1	7	2	6	4	7
AAGGTTGGTGGTTCGAG,mature-tRNA-Asn-GTT	2.08517	0.400772	0	2	0	1	6	0
AAGGTTGGTGGTTCGAGC,mature-tRNA-Asn-GTT	1.72376	0.622707	0	1	0	0	3	0
AAGGTTGGTGGTTCGAGCC,mature-tRNA-Asn-GTT	-1.6517	0.683455	0	2	0	0	0	0
AAGGTTGGTGGTTCGAGCCCACC,mature-tRNA-Asn-GTT	1.03442	0.799879	0	0	0	0	0	1
AAGGTTGGTGGTTCGAGCCCACCCAGG,mature-tRNA-Asn-GTT	1.03442	0.799879	0	0	0	1	0	0
AAGGTTGGTGGTTCGAGCCCACCCAGGG,mature-tRNA-Asn-GTT	-1.23661	0.464649	5	0	10	2	0	4
AAGGTTGGTGGTTCGAGCCCACCCAGGGA,mature-tRNA-Asn-GTT	-0.0727068	0.969318	0	4	4	0	4	2
AAGGTTGGTGGTTCGAGCCCACCCAGGGACG,mature-tRNA-Asn-GTT_3_end	1.03442	0.799879	0	0	0	1	0	0
AAGGTTGGTGGTTCGAGCCCACCCAGGGACGCC,mature-tRNA-Asn-GTT	-2.79493	0.227547	2	4	2	0	0	1
AAGGTTGGTGGTTCGAGCCCACCCAGGGACGCCA,mature-tRNA-Asn-GTT_CCA_end	-1.019	0.454102	7	7	4	5	0	4
AAGGTTGTGGGTTCG,mature-tRNA-Ile-AAT;mature-tRNA-Arg-TCT	-2.72197	0.284458	0	5	3	0	0	1
AAGGTTGTGGGTTCGAATCCCACCAGAGTCGC,mature-tRNA-Arg-TCT	-1.746	0.665753	0	0	2	0	0	0
AAGGTTGTGGGTTCGAATCCCACCAGAGTCGCC,mature-tRNA-Arg-TCT	-2.96253	0.433114	0	5	0	0	0	0
AAGGTTGTGGGTTCGAATCCCACCAGAGTCGCCA,mature-tRNA-Arg-TCT_CCA_end	0.0726449	0.985796	0	1	0	0	0	1
AAGGTTGTGGGTTCGAG,mature-tRNA-Arg-TCT	-0.889136	0.827507	0	1	0	0	0	0
AAGGTTGTGGGTTCGAGTCCCACCAGAG,mature-tRNA-Arg-TCT	3.10662	0.400582	0	0	0	0	4	0
AAGGTTGTGGGTTCGAGTCCCACCAGAGTCG,mature-tRNA-Arg-TCT_3_end	-3.57188	0.189092	1	1	5	0	0	0
AAGGTTGTGGGTTCGAGTCCCACCAGAGTCGC,mature-tRNA-Arg-TCT	-2.64177	0.506839	0	4	0	0	0	0
AAGGTTGTGGGTTCGAGTCCCACCAGAGTCGCC,mature-tRNA-Arg-TCT	-2.98559	0.382116	0	4	1	0	0	0
AAGGTTGTGGGTTCGAGTCCCACCAGAGTCGCCA,mature-tRNA-Arg-TCT_CCA_end	-2.74289	0.490177	0	0	4	0	0	0
AAGTAGTTTAATTAGAATA,mature-mt_tRNA-Pro-TGG	2.14243	0.594294	0	0	0	0	1	1
AAGTAGTTTAATTAGAATACC,mature-mt_tRNA-Pro-TGG	0.645315	0.873754	0	0	1	2	0	0
AAGTAGTTTAATTAGAATACCAGC,mature-mt_tRNA-Pro-TGG	1.03442	0.799879	0	0	0	0	0	1
AAGTAGTTTAATTAGAATACCAGCT,mature-mt_tRNA-Pro-TGG	0.875037	0.640844	1	2	1	6	1	1
AAGTAGTTTAATTAGAATACCAGCTT,mature-mt_tRNA-Pro-TGG	3.0919	0.357462	0	0	0	3	2	0
AAGTAGTTTAATTAGAATACCAGCTTT,mature-mt_tRNA-Pro-TGG	-2.32734	0.41299	1	5	0	1	0	0
AAGTAGTTTAATTAGAATACCAGCTTTG,mature-mt_tRNA-Pro-TGG	0.293613	0.865519	0	5	2	4	2	2
AAGTAGTTTAATTAGAATACCAGCTTTGG,mature-mt_tRNA-Pro-TGG	0.370493	0.886077	0	2	1	3	0	1
AAGTCACGTCGGGGT,mature-tRNA-Trp-CCA	0.675878	0.797494	1	2	0	0	4	0
AAGTCACGTCGGGGTCA,mature-tRNA-Trp-CCA_3_end	-2.32895	0.560157	0	0	3	0	0	0
AAGTCACGTCGGGGTCAC,mature-tRNA-Trp-CCA	-1.0884	0.519224	5	7	0	4	1	1
AAGTCACGTCGGGGTCACC,mature-tRNA-Trp-CCA	-0.519838	0.517208	7	38	19	20	11	11
AAGTCACGTCGGGGTCACCA,mature-tRNA-Trp-CCA_CCA_end	1.22039	0.176192	3	35	9	11	48	29
AAGTCCCTGTTCGGGCGCC,mature-tRNA-Lys-TTT	-0.889136	0.827507	1	0	0	0	0	0
AAGTCCCTGTTCGGGCGCCA,mature-tRNA-Lys-TTT_CCA_end	3.51289	0.244193	0	0	0	2	4	0
AAGTCTTACAGTCCTTA,mature-mt_tRNA-Ala-TGC_3_end	-0.889136	0.827507	1	0	0	0	0	0
AAGTCTTACAGTCCTTACC,mature-mt_tRNA-Ala-TGC	2.49607	0.532374	0	0	0	4	0	0
AAGTCTTACAGTCCTTACCA,mature-mt_tRNA-Ala-TGC_CCA_end	-2.48859	0.351658	4	2	0	0	1	0
AAGTGTAGGTTCAAT,mature-mt_tRNA-Gln-TTG	-0.219089	0.947472	0	3	0	0	2	0
AAGTGTAGGTTCAATTCCTATTGTCCTAGC,mature-mt_tRNA-Gln-TTG	-2.23023	0.577509	0	3	0	0	0	0
AAGTTAAAGTTAGAG,mature-mt_tRNA-Lys-TTT	-0.386878	0.894634	2	0	1	0	0	2
AAGTTAAAGTTAGAGA,mature-mt_tRNA-Lys-TTT	1.03442	0.799879	0	0	0	0	0	1
AAGTTAAAGTTAGAGAC,mature-mt_tRNA-Lys-TTT	-1.85677	0.645151	1	0	1	0	0	0
AAGTTAAAGTTAGAGACC,mature-mt_tRNA-Lys-TTT	0.366367	0.799492	4	1	7	14	4	0
AAGTTAAAGTTAGAGACCT,mature-mt_tRNA-Lys-TTT	0.94526	0.449897	6	0	6	12	4	8
AAGTTAAAGTTAGAGACCTT,mature-mt_tRNA-Lys-TTT	1.12696	0.232888	22	8	3	69	11	8
AAGTTAAAGTTAGAGACCTTA,mature-mt_tRNA-Lys-TTT	0.151889	0.872495	13	11	9	29	10	2
AAGTTAAAGTTAGAGACCTTAA,mature-mt_tRNA-Lys-TTT	-1.746	0.665753	0	0	2	0	0	0
AAGTTAAAGTTAGAGACCTTAAA,mature-mt_tRNA-Lys-TTT	-0.889136	0.827507	0	0	1	0	0	0
AAGTTAAAGTTAGAGACCTTAAAA,mature-mt_tRNA-Lys-TTT	3.29378	0.352189	0	0	0	7	0	0
AAGTTAAAGTTAGAGACCTTAAAAT,mature-mt_tRNA-Lys-TTT	0.645315	0.873754	1	0	0	2	0	0
AAGTTAAAGTTAGAGACCTTAAAATC,mature-mt_tRNA-Lys-TTT	1.03442	0.799879	0	0	0	0	1	0
AAGTTAAAGTTAGAGACCTTAAAATCTC,mature-mt_tRNA-Lys-TTT	1.03442	0.799879	0	0	0	1	0	0
AAGTTAAAGTTAGAGACCTTAAAATCTCC,mature-mt_tRNA-Lys-TTT	0.10325	0.931659	6	1	9	10	4	4
AAGTTAAAGTTAGAGACCTTAAAATCTCCA,mature-mt_tRNA-Lys-TTT	1.03442	0.799879	0	0	0	1	0	0
AAGTTAAAGTTAGAGACCTTAAAATCTCCATA,mature-mt_tRNA-Lys-TTT	-1.01294	0.563325	6	1	3	5	1	0
AAGTTAAAGTTAGAGACCTTAAAATCTCCATAG,mature-mt_tRNA-Lys-TTT	-0.0084041	0.995634	3	4	9	20	0	0
AAGTTAAAGTTAGAGACCTTAAAATCTCCATAGT,mature-mt_tRNA-Lys-TTT	-0.980019	0.468853	8	3	6	8	1	1
AAGTTAAAGTTAGAGACCTTAAAATCTCCATAGTG,mature-mt_tRNA-Lys-TTT	-0.213077	0.897696	3	1	5	4	4	0
AAGTTAAAGTTAGAGACCTTAAAATCTCCATAGTGA,mature-mt_tRNA-Lys-TTT_3_end	1.33368	0.531713	3	0	1	14	0	0
AAGTTAAAGTTAGAGACCTTAAAATCTCCATAGTGAC,mature-mt_tRNA-Lys-TTT	0.642491	0.796512	4	0	0	9	0	0
AAGTTAAAGTTAGAGACCTTAAAATCTCCATAGTGACC,mature-mt_tRNA-Lys-TTT	0.250252	0.872364	3	8	1	16	0	1
AAGTTAAAGTTAGAGACCTTAAAATCTCCATAGTGACCA,mature-mt_tRNA-Lys-TTT_CCA_end	-0.744634	0.574183	7	3	17	19	1	0
AAGTTAAATTATAGAT,mature-mt_tRNA-Asp-GTC	2.09257	0.603263	0	0	0	3	0	0
AAGTTAAATTATAGATC,mature-mt_tRNA-Asp-GTC	1.35057	0.659433	0	2	0	6	0	0
AAGTTAAATTATAGATCA,mature-mt_tRNA-Asp-GTC	3.13682	0.344436	0	0	0	3	0	2
AAGTTAAATTATAGATCAA,mature-mt_tRNA-Asp-GTC	-0.138776	0.96632	0	3	0	0	0	2
AAGTTAAATTATAGATCAAT,mature-mt_tRNA-Asp-GTC	0.707026	0.500883	25	2	2	30	17	7
AAGTTAAATTATAGATCAATA,mature-mt_tRNA-Asp-GTC	-0.971496	0.567405	5	2	3	2	0	3
AAGTTAAATTATAGATCAATAATC,mature-mt_tRNA-Asp-GTC	4.58145	0.0554549	0	0	0	14	2	0
AAGTTAAATTATAGATCAATAATCT,mature-mt_tRNA-Asp-GTC	1.03442	0.799879	0	0	0	1	0	0
AAGTTAAATTATAGATCAATAATCTA,mature-mt_tRNA-Asp-GTC	1.60709	0.692322	0	0	0	2	0	0
AAGTTAAATTATAGATCAATAATCTAT,mature-mt_tRNA-Asp-GTC	-2.68194	0.29651	4	3	0	0	1	0
AAGTTAAATTATAGATCAATAATCTATA,mature-mt_tRNA-Asp-GTC	-0.286388	0.877423	2	5	2	9	0	0
AAGTTAAATTATAGATCAATAATCTATAT,mature-mt_tRNA-Asp-GTC	0.615155	0.749363	3	2	1	12	0	0
AAGTTAAATTATAGATCAATAATCTATATA,mature-mt_tRNA-Asp-GTC	-1.01076	0.448671	13	7	4	14	1	0
AAGTTAAATTATAGATCAATAATCTATATAT,mature-mt_tRNA-Asp-GTC	3.3342	0.253503	0	0	0	4	1	1
AAGTTAAATTATAGATCAATAATCTATATATC,mature-mt_tRNA-Asp-GTC	-0.123094	0.914406	6	9	3	10	4	3
AAGTTAAATTATAGATCAATAATCTATATATCT,mature-mt_tRNA-Asp-GTC	-0.229928	0.913888	4	0	3	8	0	0
AAGTTAAATTATAGATCAATAATCTATATATCTTAC,mature-mt_tRNA-Asp-GTC	-0.999826	0.803743	2	0	0	1	0	0
AAGTTAAATTATAGATCAATAATCTATATATCTTACC,mature-mt_tRNA-Asp-GTC	1.60709	0.692322	0	0	0	2	0	0
AAGTTAAATTATAGATCAATAATCTATATATCTTACCA,mature-mt_tRNA-Asp-GTC_CCA_end	-1.59206	0.563812	2	0	3	2	0	0
AAGTTAGAGACCTTA,mature-mt_tRNA-Lys-TTT	-1.6517	0.683455	0	2	0	0	0	0
AAGTTAGAGACCTTAAAATCTC,mature-mt_tRNA-Lys-TTT	3.07206	0.41318	0	0	0	6	0	0
AAGTTAGAGACCTTAAAATCTCC,mature-mt_tRNA-Lys-TTT	0.334233	0.864766	1	3	1	3	0	3
AAGTTAGAGACCTTAAAATCTCCATA,mature-mt_tRNA-Lys-TTT	2.34189	0.451557	0	1	0	7	0	0
AAGTTAGAGACCTTAAAATCTCCATAG,mature-mt_tRNA-Lys-TTT	2.14243	0.594294	0	0	0	0	1	1
AAGTTAGAGACCTTAAAATCTCCATAGT,mature-mt_tRNA-Lys-TTT	1.75224	0.327839	1	1	1	5	1	4
AAGTTAGAGACCTTAAAATCTCCATAGTG,mature-mt_tRNA-Lys-TTT	0.871697	0.658649	2	3	0	10	0	1
AAGTTAGAGACCTTAAAATCTCCATAGTGA,mature-mt_tRNA-Lys-TTT_3_end	0.254979	0.900639	4	3	0	11	0	0
AAGTTAGAGACCTTAAAATCTCCATAGTGAC,mature-mt_tRNA-Lys-TTT	3.18106	0.194757	0	1	0	11	1	0
AAGTTAGAGACCTTAAAATCTCCATAGTGACC,mature-mt_tRNA-Lys-TTT	-0.734223	0.476461	19	10	10	23	4	1
AAGTTAGAGACCTTAAAATCTCCATAGTGACCA,mature-mt_tRNA-Lys-TTT_CCA_end	-0.255274	0.660682	84	69	77	138	34	38
AAGTTTAACTTCTGC,mature-mt_tRNA-Trp-TCA	-0.232583	0.835929	12	4	5	13	5	2
AAGTTTAACTTCTGCC,mature-mt_tRNA-Trp-TCA	1.3307	0.170726	25	4	4	50	39	4
AAGTTTAACTTCTGCCA,mature-mt_tRNA-Trp-TCA_CCA_end	1.76066	0.00920744	114	51	91	254	510	73
AAGTTTAGGATATAC,mature-mt_tRNA-Trp-TCA	1.03442	0.799879	0	0	0	0	1	0
AAGTTTAGGATATACT,mature-mt_tRNA-Trp-TCA	2.14243	0.594294	0	0	0	0	1	1
AAGTTTAGGATATACTAG,mature-mt_tRNA-Trp-TCA	-1.746	0.665753	0	0	2	0	0	0
AAGTTTAGGATATACTAGT,mature-mt_tRNA-Trp-TCA	2.49607	0.532374	0	0	0	4	0	0
AAGTTTAGGATATACTAGTC,mature-mt_tRNA-Trp-TCA	3.43498	0.223546	0	0	0	3	2	1
AAGTTTAGGATATACTAGTCCG,mature-mt_tRNA-Trp-TCA	-1.6517	0.683455	0	2	0	0	0	0
AAGTTTAGGATATACTAGTCCGCGAGCCTTC,mature-mt_tRNA-Trp-TCA	2.09257	0.603263	0	0	0	3	0	0
AATAAACCCAGAAGAG,mature-mt_tRNA-Gly-TCC	-1.96161	0.625864	2	0	0	0	0	0
AATAAACCCAGAAGAGA,mature-mt_tRNA-Gly-TCC	0.406796	0.872961	1	1	1	5	0	0
AATAAACCCAGAAGAGAG,mature-mt_tRNA-Gly-TCC	3.68549	0.069077	0	1	0	2	4	6
AATAAACCCAGAAGAGAGT,mature-mt_tRNA-Gly-TCC	2.17795	0.319342	0	2	0	3	2	3
AATAAACCCAGAAGAGAGTA,mature-mt_tRNA-Gly-TCC_3_end	-0.691612	0.783564	3	2	0	4	0	0
AATAAACCCAGAAGAGAGTAC,mature-mt_tRNA-Gly-TCC	1.37397	0.427106	2	0	2	6	3	2
AATAAACCCAGAAGAGAGTACC,mature-mt_tRNA-Gly-TCC	0.618976	0.361444	26	22	16	58	29	16
AATAAACCCAGAAGAGAGTACCA,mature-mt_tRNA-Gly-TCC_CCA_end	0.640387	0.275169	38	123	90	84	137	117
AATAAACCTCCTTATT,mature-mt_tRNA-His-GTG	0.0726449	0.985796	1	0	0	1	0	0
AATAAACCTCCTTATTC,mature-mt_tRNA-His-GTG	1.11375	0.633246	3	0	0	0	4	2
AATAAACCTCCTTATTCA,mature-mt_tRNA-His-GTG	2.33584	0.202015	2	1	0	5	10	0
AATAAACCTCCTTATTCACC,mature-mt_tRNA-His-GTG_3_end	1.45208	0.410312	1	5	0	17	2	0
AATAAACCTCCTTATTCACCC,mature-mt_tRNA-His-GTG	-0.469642	0.68657	28	0	7	14	9	5
AATAAACCTCCTTATTCACCCC,mature-mt_tRNA-His-GTG	0.268356	0.635959	56	39	50	60	53	54
AATAAACCTCCTTATTCACCCCA,mature-mt_tRNA-His-GTG_CCA_end	-0.0261994	0.960492	78	89	120	89	110	64
AATAACAAAGCAAAG,mature-mt_tRNA-Phe-GAA	0.0170604	0.995999	0	0	2	1	1	0
AATAACAAAGCAAAGC,mature-mt_tRNA-Phe-GAA	1.92282	0.529618	0	0	1	2	0	2
AATAACAAAGCAAAGCACT,mature-mt_tRNA-Phe-GAA	1.24751	0.424996	2	0	5	1	3	10
AATAACAAAGCAAAGCACTG,mature-mt_tRNA-Phe-GAA	0.977474	0.216563	6	10	21	42	20	12
AATAACAAAGCAAAGCACTGA,mature-mt_tRNA-Phe-GAA	0.980765	0.490466	4	2	1	6	6	2
AATAACAAAGCAAAGCACTGAA,mature-mt_tRNA-Phe-GAA	1.43999	0.263861	2	3	2	7	6	5
AATAACAAAGCAAAGCACTGAAAATG,mature-mt_tRNA-Phe-GAA	-0.889136	0.827507	0	1	0	0	0	0
AATAACAAAGCAAAGCACTGAAAATGCTTAGATGG,mature-mt_tRNA-Phe-GAA	-0.889136	0.827507	1	0	0	0	0	0
AATAACAAAGCAAAGCACTGAAAATGCTTAGATGGAT,mature-mt_tRNA-Phe-GAA	0.0726449	0.985796	0	0	1	0	0	1
AATAACAAAGCAAAGCACTGAAAATGCTTAGATGGATA,mature-mt_tRNA-Phe-GAA	-0.889136	0.827507	1	0	0	0	0	0
AATAACAAAGCAAAGCACTGAAAATGCTTAGATGGATAATTG,mature-mt_tRNA-Phe-GAA	-0.889136	0.827507	0	0	1	0	0	0
AATAACGCCAAGGTCGCGGG,mature-tRNA-Ile-AAT	-0.889136	0.827507	0	1	0	0	0	0
AATAATCTATATATC,mature-mt_tRNA-Asp-GTC	-0.889136	0.827507	0	0	1	0	0	0
AATAATCTATATATCTTA,mature-mt_tRNA-Asp-GTC_3_end	1.03442	0.799879	0	0	0	0	0	1
AATAATCTATATATCTTAC,mature-mt_tRNA-Asp-GTC	-2.14194	0.463103	2	3	0	1	0	0
AATAATCTATATATCTTACC,mature-mt_tRNA-Asp-GTC	1.51164	0.0669985	26	15	3	76	47	13
AATAATCTATATATCTTACCA,mature-mt_tRNA-Asp-GTC_CCA_end	2.04542	0.00135995	182	116	124	662	936	129
AATACCAGCTTTGGGTGCTGGTGGTGG,mature-mt_tRNA-Pro-TGG	3.14829	0.341453	0	0	0	0	2	2
AATACCAGCTTTGGGTGCTGGTGGTGGG,mature-mt_tRNA-Pro-TGG	2.09257	0.603263	0	0	0	3	0	0
AATACCAGCTTTGGGTGCTGGTGGTGGGG,mature-mt_tRNA-Pro-TGG	2.78009	0.485032	0	0	0	0	0	3
AATACCAGCTTTGGGTGCTGGTGGTGGGGAGTAG,mature-mt_tRNA-Pro-TGG	1.22014	0.750661	0	0	1	0	0	2
AATAGATGTAGGATG,mature-mt_tRNA-Ala-TGC	0.491891	0.651577	17	3	2	9	16	6
AATAGATGTAGGATGA,mature-mt_tRNA-Ala-TGC	0.988651	0.486711	3	1	4	4	10	1
AATAGATGTAGGATGAA,mature-mt_tRNA-Ala-TGC	1.06225	0.447245	2	0	7	4	7	6
AATAGATGTAGGATGAAG,mature-mt_tRNA-Ala-TGC	-0.487136	0.578802	18	8	15	18	6	7
AATAGATGTAGGATGAAGT,mature-mt_tRNA-Ala-TGC	0.717036	0.181888	82	55	53	116	104	84
AATAGATGTAGGATGAAGTC,mature-mt_tRNA-Ala-TGC	0.254837	0.658593	46	40	35	53	47	39
AATAGATGTAGGATGAAGTCT,mature-mt_tRNA-Ala-TGC	0.0764893	0.910643	44	17	31	50	34	17
AATAGATGTAGGATGAAGTCTT,mature-mt_tRNA-Ala-TGC	1.09482	0.121573	18	17	15	28	50	21
AATAGATGTAGGATGAAGTCTTA,mature-mt_tRNA-Ala-TGC	-0.566863	0.677668	2	3	10	5	4	1
AATAGATGTAGGATGAAGTCTTAC,mature-mt_tRNA-Ala-TGC	1.74065	0.472105	2	0	0	3	0	4
AATAGATGTAGGATGAAGTCTTACA,mature-mt_tRNA-Ala-TGC	-0.399803	0.851469	3	2	1	0	4	0
AATAGATGTAGGATGAAGTCTTACAGT,mature-mt_tRNA-Ala-TGC	0.157435	0.878238	7	8	6	10	10	3
AATAGATGTAGGATGAAGTCTTACAGTCC,mature-mt_tRNA-Ala-TGC	3.29378	0.352189	0	0	0	7	0	0
AATAGATGTAGGATGAAGTCTTACAGTCCT,mature-mt_tRNA-Ala-TGC	-0.719823	0.824924	0	2	1	2	0	0
AATAGATGTAGGATGAAGTCTTACAGTCCTT,mature-mt_tRNA-Ala-TGC	1.60709	0.692322	0	0	0	2	0	0
AATAGATGTAGGATGAAGTCTTACAGTCCTTAC,mature-mt_tRNA-Ala-TGC	-0.889136	0.827507	0	0	1	0	0	0
AATAGATGTAGGATGAAGTCTTACAGTCCTTACC,mature-mt_tRNA-Ala-TGC	-0.124708	0.940069	3	0	6	6	1	2
AATAGATGTAGGATGAAGTCTTACAGTCCTTACCA,mature-mt_tRNA-Ala-TGC_CCA_end	0.573003	0.42131	18	16	17	48	18	14
AATAGGGTATTTAGC,mature-mt_tRNA-Asn-GTT	1.99174	0.354922	0	1	1	5	1	2
AATAGGGTATTTAGCT,mature-mt_tRNA-Asn-GTT	-1.2915	0.556719	6	1	0	1	2	0
AATAGGGTATTTAGCTG,mature-mt_tRNA-Asn-GTT	-1.6643	0.164886	15	10	3	4	4	1
AATAGGGTATTTAGCTGT,mature-mt_tRNA-Asn-GTT	-0.12232	0.881145	11	15	15	21	7	10
AATAGGGTATTTAGCTGTT,mature-mt_tRNA-Asn-GTT	0.0189888	0.979395	24	34	10	36	13	20
AATAGGGTATTTAGCTGTTA,mature-mt_tRNA-Asn-GTT	1.03442	0.799879	0	0	0	0	0	1
AATAGGGTATTTAGCTGTTAA,mature-mt_tRNA-Asn-GTT	-1.746	0.665753	0	0	2	0	0	0
AATAGGGTATTTAGCTGTTAAC,mature-mt_tRNA-Asn-GTT	-2.32895	0.560157	0	0	3	0	0	0
AATAGGGTATTTAGCTGTTAACT,mature-mt_tRNA-Asn-GTT	-2.27522	0.183689	4	9	4	0	3	0
AATAGGGTATTTAGCTGTTAACTA,mature-mt_tRNA-Asn-GTT	0.16073	0.931707	0	3	3	2	3	1
AATAGGGTATTTAGCTGTTAACTAA,mature-mt_tRNA-Asn-GTT	-2.23928	0.422101	3	0	2	0	0	1
AATAGGGTATTTAGCTGTTAACTAAA,mature-mt_tRNA-Asn-GTT	-1.39372	0.419044	6	5	1	0	3	1
AATAGGGTATTTAGCTGTTAACTAAAT,mature-mt_tRNA-Asn-GTT	0.193849	0.730961	29	54	48	62	44	37
AATAGGGTATTTAGCTGTTAACTAAATT,mature-mt_tRNA-Asn-GTT	0.34805	0.615503	25	22	15	41	15	24
AATAGGGTATTTAGCTGTTAACTAAATTT,mature-mt_tRNA-Asn-GTT	0.882907	0.509899	3	1	5	12	2	4
AATAGGGTATTTAGCTGTTAACTAAATTTT,mature-mt_tRNA-Asn-GTT	0.998214	0.339616	3	6	6	13	12	4
AATAGGGTATTTAGCTGTTAACTAAATTTTC,mature-mt_tRNA-Asn-GTT	2.89254	0.11229	2	0	0	5	7	3
AATAGGGTATTTAGCTGTTAACTAAATTTTCG,mature-mt_tRNA-Asn-GTT	-1.57266	0.52075	0	7	1	3	0	0
AATAGGGTATTTAGCTGTTAACTAAATTTTCGT,mature-mt_tRNA-Asn-GTT	-1.09887	0.285647	10	11	11	5	2	7
AATAGGGTATTTAGCTGTTAACTAAATTTTCGTA,mature-mt_tRNA-Asn-GTT	-0.29367	0.852202	0	6	5	3	2	3
AATAGGGTATTTAGCTGTTAACTAAATTTTCGTAG,mature-mt_tRNA-Asn-GTT	1.72374	0.508094	0	2	0	0	2	3
AATAGGGTATTTAGCTGTTAACTAAATTTTCGTAGG,mature-mt_tRNA-Asn-GTT	0.471633	0.81069	0	1	5	7	0	2
AATAGGGTATTTAGCTGTTAACTAAATTTTCGTAGGT,mature-mt_tRNA-Asn-GTT	-1.746	0.665753	0	0	2	0	0	0
AATAGGGTATTTAGCTGTTAACTAAATTTTCGTAGGTT,mature-mt_tRNA-Asn-GTT	-3.31203	0.292548	0	1	5	0	0	0
AATAGGGTATTTAGCTGTTAACTAAATTTTCGTAGGTTT,mature-mt_tRNA-Asn-GTT	2.09257	0.603263	0	0	0	3	0	0
AATAGGGTATTTAGCTGTTAACTAAATTTTCGTAGGTTTAA,mature-mt_tRNA-Asn-GTT	-1.6517	0.683455	0	2	0	0	0	0
AATAGTAATCCATTGG,mature-mt_tRNA-Leu-TAG	-1.27155	0.728213	0	3	0	0	0	1
AATAGTAATCCATTGGT,mature-mt_tRNA-Leu-TAG	0.243452	0.906074	2	0	3	3	0	3
AATAGTAATCCATTGGTC,mature-mt_tRNA-Leu-TAG	-0.0932917	0.96027	1	2	6	0	7	0
AATAGTAATCCATTGGTCT,mature-mt_tRNA-Leu-TAG	-0.422333	0.505645	60	30	36	39	32	23
AATAGTAATCCATTGGTCTT,mature-mt_tRNA-Leu-TAG	0.331918	0.572446	62	30	54	100	46	45
AATAGTAATCCATTGGTCTTA,mature-mt_tRNA-Leu-TAG	0.572434	0.474515	21	7	12	22	23	14
AATAGTAATCCATTGGTCTTAG,mature-mt_tRNA-Leu-TAG	-0.261512	0.691608	32	31	27	38	26	12
AATAGTAATCCATTGGTCTTAGG,mature-mt_tRNA-Leu-TAG	0.290964	0.749013	5	13	20	7	23	10
AATAGTAATCCATTGGTCTTAGGA,mature-mt_tRNA-Leu-TAG	-3.50845	0.235495	0	3	4	0	0	0
AATAGTAATCCATTGGTCTTAGGAA,mature-mt_tRNA-Leu-TAG	1.20587	0.482481	0	3	2	6	1	4
AATAGTAATCCATTGGTCTTAGGAAC,mature-mt_tRNA-Leu-TAG	-0.276928	0.835993	0	10	8	4	6	3
AATAGTAATCCATTGGTCTTAGGAACC,mature-mt_tRNA-Leu-TAG	-0.889136	0.827507	1	0	0	0	0	0
AATAGTAATCCATTGGTCTTAGGAACCA,mature-mt_tRNA-Leu-TAG	-0.354764	0.887419	0	2	3	0	0	3
AATAGTAATCCATTGGTCTTAGGAACCAAAA,mature-mt_tRNA-Leu-TAG	1.03442	0.799879	0	0	0	0	1	0
AATAGTAATCCATTGGTCTTAGGAACCAAAAAC,mature-mt_tRNA-Leu-TAG	0.0726449	0.985796	0	0	1	0	0	1
AATAGTAATCCATTGGTCTTAGGAACCAAAAACC,mature-mt_tRNA-Leu-TAG	-1.746	0.665753	0	0	2	0	0	0
AATAGTAATCCATTGGTCTTAGGAACCAAAAACCT,mature-mt_tRNA-Leu-TAG	-0.889136	0.827507	0	0	1	0	0	0
AATATAACTGACTTC,mature-mt_tRNA-Gly-TCC	0.0726449	0.985796	0	0	1	1	0	0
AATATAACTGACTTCC,mature-mt_tRNA-Gly-TCC	0.614732	0.758425	6	0	1	0	10	0
AATATAACTGACTTCCA,mature-mt_tRNA-Gly-TCC	1.03442	0.799879	0	0	0	0	1	0
AATATAACTGACTTCCAAT,mature-mt_tRNA-Gly-TCC	1.60709	0.692322	0	0	0	2	0	0
AATATAACTGACTTCCAATT,mature-mt_tRNA-Gly-TCC	-0.760342	0.727844	3	5	0	0	4	0
AATATAACTGACTTCCAATTA,mature-mt_tRNA-Gly-TCC	0.455739	0.841659	0	3	1	2	3	0
AATATAACTGACTTCCAATTAG,mature-mt_tRNA-Gly-TCC	0.0726449	0.985796	0	0	1	0	0	1
AATATAACTGACTTCCAATTAGT,mature-mt_tRNA-Gly-TCC	1.23714	0.4243	2	1	2	3	5	3
AATATAACTGACTTCCAATTAGTA,mature-mt_tRNA-Gly-TCC	1.03442	0.799879	0	0	0	1	0	0
AATATAACTGACTTCCAATTAGTAG,mature-mt_tRNA-Gly-TCC	-2.28499	0.311142	1	6	2	2	0	0
AATATAACTGACTTCCAATTAGTAGA,mature-mt_tRNA-Gly-TCC	1.37434	0.197351	3	6	3	8	10	10
AATATAACTGACTTCCAATTAGTAGAT,mature-mt_tRNA-Gly-TCC	0.893214	0.735827	3	0	0	8	0	0
AATATAACTGACTTCCAATTAGTAGATT,mature-mt_tRNA-Gly-TCC	-0.000209204	0.999765	14	95	64	34	41	70
AATATAACTGACTTCCAATTAGTAGATTC,mature-mt_tRNA-Gly-TCC	1.27293	0.643886	0	0	2	3	2	0
AATATAACTGACTTCCAATTAGTAGATTCT,mature-mt_tRNA-Gly-TCC	0.302052	0.819496	1	9	7	11	0	9
AATATAACTGACTTCCAATTAGTAGATTCTG,mature-mt_tRNA-Gly-TCC	-1.04875	0.512003	3	5	4	4	0	2
AATATAACTGACTTCCAATTAGTAGATTCTGA,mature-mt_tRNA-Gly-TCC	-0.337864	0.723819	10	10	10	13	3	8
AATATAACTGACTTCCAATTAGTAGATTCTGAA,mature-mt_tRNA-Gly-TCC	-0.318794	0.700389	14	10	19	18	10	7
AATATAACTGACTTCCAATTAGTAGATTCTGAAT,mature-mt_tRNA-Gly-TCC	-0.11407	0.89402	22	20	29	66	8	4
AATATAACTGACTTCCAATTAGTAGATTCTGAATA,mature-mt_tRNA-Gly-TCC	-0.693555	0.426728	13	10	45	33	7	6
AATATAACTGACTTCCAATTAGTAGATTCTGAATAA,mature-mt_tRNA-Gly-TCC	-3.54988	0.275128	0	0	7	0	0	0
[truncated: 41,317 more rows]
