# Supplementary material for: Curcumin improves atrial fibrillation susceptibility by regulating tsRNA expression in aging mouse atrium
Source: PeerJ. 2024 Jul 26;12:e17495. doi: 10.7717/peerj.17495 (PMC11285363; doi:10.7717/peerj.17495)
Supplement: Supplemental Information 4 — Rapid atrial pacing was performed through the electrophysiological characteristics of mice [file peerj-12-17495-s004.xlsx]

## Sheet: Sheet1
	The Raw Data for Electrophysiology（Table 2）
	N	BW（g）	HR(BPM)	PWD（ms）	PR interval(ms)	QRS duration(ms)	QT inerval(ms)	SNRT（ms）	CSNRT（ms）
	5mo	26.2	454.545	18	44	14	32	141	34.8
	5mo	27	432.588	14	47	16	25	141	26.6
	5mo	29.1	530.973	15	45	14	31	145	28.1
	5mo	27.1	284.36	18	42	14	28	126	20.8
	5mo	24.6	441.176	14	46	13	26	119	23.8
	5mo	24	495.868	16	45	13	28	135	20.8
	18mo	37.3	384.615	20	59	12	26	277	125.2
	18mo	30.9	342.857	22	46	20	35	249	75.2
	18mo	31.2	304.569	22	54	12	28	299	103.6
	18mo	31.2	566.038	20	48	13	29	158	51
	18mo	30.3	491.803	18	57	15	27	217	66
	18mo	37.8	390.117	19	57	19	37	187	57
	18mo+Cur	32.4	445.104	16	39	11	25	158	23.4
	18mo+Cur	33.2	430.416	16	42	13	25	176	46.6
	18mo+Cur	32.5	350.877	15	43	18	31	213	35.8
	18mo+Cur	34.3	317.965	17	43	13	32	198	9.6
	18mo+Cur	37.9	350.058	17	44	11	27	198	28
	18mo+Cur	33.5	480	18	45	17	31	170	54.7
