# Supplementary material for: Curcumin improves atrial fibrillation susceptibility by regulating tsRNA expression in aging mouse atrium
Source: PeerJ. 2024 Jul 26;12:e17495. doi: 10.7717/peerj.17495 (PMC11285363; doi:10.7717/peerj.17495)
Supplement: Supplemental Information 5 [file peerj-12-17495-s005.xlsx]

## Sheet: Sheet1
Figure 1D Ct values of inflammatory index in qPCR
	5mo						18mo						18mo+Cur
	Replicate 1	Replicate 2	Replicate 3	Replicate 4	Replicate 5	Replicate 6	Replicate 1	Replicate 2	Replicate 3	Replicate 4	Replicate 5	Replicate 6	Replicate 1	Replicate 2	Replicate 3	Replicate 4	Replicate 5	Replicate 6
GAPDH	20.32	13.92	16.63	No Ct	15.25	19.16	13.17	14.17	14.33	16.69	14.53	14.91	14.07	16.84	14.9	25.24	14.38	15.03
	20.01	13.66	16.5	26.52	15.09	18.93	13.2	14.01	14.27	16.33	14.32	14.93	14.11	17.01	14.75	25.51	14.24	14.32
IL-6	34.07	26.29	28.92	26.82	27.7	30.37	25.53	25.55	24.39	21.66	24.47	24.5	29.3	31.29	27.44	31.32	26.16	26.1
	No Ct	26.29	29.02	32.6	27.56	No Ct	25.23	25.99	24.15	21.66	24.33	24.62	27.69	28.56	26.68	No Ct	26.59	26.66
GAPDH	14.76	14.15	17.77	13.29	14.26	18.22	15.4	14.28	20.79	14.16	20.84	16.72	18.46	15.55	16	14.34	14.26	14.38
	14.95	14.07	17.65	13.51	14.19	18.2	15.28	14.61	20.82	14.08	20.53	16.9	18.49	15.32	16.08	14.29	14.19	14.67
TNF-α	28.96	27.96	31.25	28.07	26.97	31.09	27.58	26.34	32.93	26.07	33.46	28.11	34.73	28.42	28.47	27.86	26.97	26.32
	29.62	27.65	31	27.31	26.39	29.94	27.73	26.74	30.95	26.22	30.71	28.18	29.85	29.57	28.57	28.97	26.39	26.89
