# Supplementary material for: Curcumin improves atrial fibrillation susceptibility by regulating tsRNA expression in aging mouse atrium
Source: PeerJ. 2024 Jul 26;12:e17495. doi: 10.7717/peerj.17495 (PMC11285363; doi:10.7717/peerj.17495)
Supplement: Supplemental Information 6 [file peerj-12-17495-s006.xlsx]

## Sheet: Sheet1
			Figure 5A-H Ct values of tsRNAs and core target genes in RT-qPCR
				5mo						18mo						18mo+curcumins
				Replicate 1	Replicate 2	Replicate 3	Replicate 4	Replicate 5	Replicate 6	Replicate 1	Replicate 2	Replicate 3	Replicate 4	Replicate 5	Replicate 6	Replicate 1	Replicate 2	Replicate 3	Replicate 4	Replicate 5	Replicate 6
			U6	13.23	12.34	12.43	13.36	13.06	12.87	12.9	13.28	14.12	13.02	13.53	14.78	13.22	13.11	13.26	12.68	13.33	13.23
				13.38	12.44	12.76	13.19	13.11	12.79	12.57	13.31	14.03	13.02	13.69	13.89	13.42	13.08	13.25	12.66	13.4	13.21
			mature-mt_tRNA-Val-TAC_CCA_end	9.6	8.6	8.32	8.16	9.34	8.12	8.15	8.34	7.55	9.27	7.38	7.38	9.75	9.24	8.32	9	9.35	9.1
				9.48	8.29	8.27	8.1	9.14	7.96	8.11	8.4	7.54	9.16	7.33	7.4	10.48	9.24	8.29	8.97	9.26	9.07
			U6	13.57	12.49	12.21	12.79	12.34	12.23	14.11	12.01	12.41	11.83	12.47	13.1	14.24	11.82	15.04	14.86	12.46	13.1
				13.59	12.73	12.26	12.59	12.14	12.24	14.18	12.08	12.38	12.07	12.21	13.03	13.24	11.81	15.02	15.09	12.59	12.6
			mature-mt_tRNA-Glu-TTC_CCA_end	8.15	8.71	8.1	8.73	8.07	8.18	7.48	7.36	7.57	7.67	7.74	8.12	8.38	8.09	11.01	11.65	8.52	8.38
				8.22	8.79	8.09	8.97	8.15	7.97	7.61	7.42	7.53	7.49	7.81	7.91	8.47	8.05	11.1	11.42	8.66	8.32
			U6	12.7	14.84	15.98	12.43	12.34	13.23	13.39	14.69	15.09	13.28	12.9	14.12	12.62	15.95	18.78	13.26	13.22	13.26
				12.88	14.96	16.01	12.76	12.44	13.38	13.22	14.69	15.22	13.31	12.57	14.03	12.53	16	18.65	13.25	13.42	13.25
			mature-tRNA-Asp-GTC_CCA_end	9.84	13.41	13.9	10.2	9.22	9.78	8.17	10.88	11.56	8.88	8.12	8.4	10.33	13.58	14.48	10.57	10.8	10.57
				10.31	12.48	13.9	9.81	9.09	9.67	8.1	11.35	11.67	8.69	8.14	8.49	10.3	13.26	14.34	10.47	10.88	10.47
			U6	12.66	13.33	12.21	12.79	12.75	12.73	12.56	12.79	13.31	11.64	11.83	12.12	13.33	14.14	11.82	14.86	13.14	12.82
				12.57	13.57	12.26	12.59	12.02	12.55	12.51	12.86	13.35	11.65	12.07	12.23	13.57	14.16	11.81	15.09	12.8	12.89
			mature-mt_tRNA-Thr-TGT_5_end	22.56	21.55	22.01	21.42	21.13	20.75	23.32	22.86	22.18	21.47	20.82	21.73	24.2	23.13	21.71	24.3	20.97	21.64
				22.26	21.53	21.97	21.4	20.62	20.24	23.18	23.11	22.24	21.89	21.1	21.29	23.6	22.3	22.03	24.23	21.17	21.26
			GAPDH	16.35	16.67	17.26	17.31	19.88	19.35	16.27	16.24	17.17	17.38	15.24	16.25	15.52	15.32	15.91	15.29	16.34	16.14
				16.35	16.41	17.22	17.39	19.31	19.78	16.21	16.17	17.32	17.37	15.24	16.25	15.23	16.14	15.29	15.99	16.23	16.22
			Smad3	27.15	27.06	26.95	26.89	29.03	29	26.41	26.03	26.95	26.63	24.44	24.43	25.99	25.75	25.22	25.1	25.68	25.31
				27.06	27.11	26.98	26.92	29.11	28.77	26.18	26.01	26.59	26.49	24.26	24.58	25.82	25.57	25.03	25.05	25.65	25.46
			GAPDH	15.48	19.1	16.36	18.76	18.77	16.29	14.29	18.09	15.17	14.92	15.29	14.37	21.04	18.21	18.34	16.01	14.48	15.1
				15.35	19.07	16.25	18.77	18.62	16.41	14.24	No Ct	15.05	15.06	15.37	14.39	20.94	18.18	18.27	16.12	14.6	15.21
			Mkl1	26.15	29.16	25.73	28.18	28.05	25.55	24.07	27.8	24.33	24.04	24.3	23.37	32.13	28.31	28.04	25.69	24.08	24.59
				26.17	28.9	26.01	28.38	27.85	25.26	24.08	No Ct	24.03	23.97	24.29	23.22	30.91	28.34	28.09	25.96	24.05	24.77
			GAPDH	19.11	16.58	19.15	16.53	19.76	20.21	16.68	16.63	19.05	18.77	18.4	18.41	15.13	15.09	18.22	18.27	14.27	14.5
				18.94	16.85	18.96	16.91	19.6	19.78	16.28	16.25	18.82	18.88	18.46	19.41	15.18	15.17	18.4	18.23	14.42	14.61
			Ndufs6	22.77	20.35	22.79	20.07	22.64	22.64	20.95	19.98	22.03	21.52	21.1	21.17	19.02	18.89	21.95	21.99	17.22	17.33
				22.56	20.29	22.51	20.16	22.18	22.19	20.61	20.53	21.69	21.57	21.12	20.9	19.19	19.04	21.99	21.65	17.37	17.47
			GAPDH	20	19.92	19.14	19.05	19.19	19.52	15.65	14.98	15.22	15.58	19.12	19.15	15.14	15.63	15.33	15.47	18.7	18.74
				19.63	19.79	19.23	19.54	19.04	19.22	15.62	15.13	14.91	15.49	19.03	18.95	15.35	15.34	15.38	15.65	18.72	18.59
			Mrpl27	27.04	26.62	25.52	25.77	25.2	25.8	24.05	23.16	23.31	23.52	26.47	26.17	23.08	23.07	22.9	22.93	25.9	25.85
				26.52	26.8	25.64	25.61	25.63	24.83	24.16	23.37	23.13	23.81	26.25	26.38	23.62	23.18	23.04	23.05	No Ct	No Ct
