# Supplementary material for: Curcumin improves atrial fibrillation susceptibility by regulating tsRNA expression in aging mouse atrium
Source: PeerJ. 2024 Jul 26;12:e17495. doi: 10.7717/peerj.17495 (PMC11285363; doi:10.7717/peerj.17495)
Supplement: Supplemental Information 7 [file peerj-12-17495-s007.xlsx]

## Sheet: Sheet1
Figure 6C Ct values of tsRNA and target genes in RT-qPCR
	NC			mimics
	Replicate 1	Replicate 2	Replicate 3	Replicate 1	Replicate 2	Replicate 3
U6	13.99	13.71	13.83	16.77	14.07	16.58
	14.02	13.78	13.68	16.61	14.08	16.68
mature-mt_tRNA-Val-TAC_CCA_end	28.29	29.17	29.09	29.89	28.26	30.29
	28.19	29.39	29.2	30.24	28.43	30.22
GAPDH	24.57	24.96	24.84	24.79	25.02	25.07
	24.42	24.76	24.49	25.05	25.08	24.94
TNF-α	22.73	24.07	23.98	22.57	23.71	23.97
	22.64	24.08	24.13	22.73	23.54	23.73
GAPDH	24.57	24.55	24.96	24.79	26.26	25.02
	24.42	23.79	24.76	25.05	26.02	25.08
IL-6	21.54	21.85	22.82	21.5	23.18	22.74
	21.89	21.78	22.92	21.6	23.04	22.55
GAPDH	25.16	23.28	25.18	23.24	23.34	24.88
	25.3	23.1	25.15	23.99	24.42	26.73
Smad3	21.33	19.01	19.65	19.03	19	19.8
	21.22	18.92	19.78	19.03	18.67	19.97
GAPDH	25.16	23.28	25.18	23.24	23.34	24.88
	25.3	23.1	25.15	23.99	24.42	26.73
Ndufs6	18.27	16.59	17.15	16.14	15.83	16.66
	18.57	16.29	16.77	16.14	15.96	16.93
GAPDH	25.16	23.28	25.18	23.24	23.34	24.88
	25.3	23.1	25.15	23.99	24.42	26.73
Mrpl27	18.15	15.4	16.63	15.61	15.5	16.49
	17.91	15.88	16.45	15.69	15.52	16.22
GAPDH	25.16	23.28	26.36	23.24	23.34	24.42
	25.3	23.1	26.91	23.99	24.42	24.97
Mkl1	20.32	17.66	21.52	17.62	17.83	18.96
	20.5	17.8	21.51	17.72	17.89	18.79
