# Supplementary material for: Curcumin improves atrial fibrillation susceptibility by regulating tsRNA expression in aging mouse atrium
Source: PeerJ. 2024 Jul 26;12:e17495. doi: 10.7717/peerj.17495 (PMC11285363; doi:10.7717/peerj.17495)
Supplement: Supplemental Information 8 [file peerj-12-17495-s008.xlsx]

## Sheet: Sheet1
Figure 7C Ct values of tsRNA and target genes in RT-qPCR
	Control+NC			TBHP+NC			TBHP+inhibitor
	Replicate 1	Replicate 2	Replicate 3	Replicate 1	Replicate 2	Replicate 3	Replicate 1	Replicate 2	Replicate 3
U6	11.26	14.36	14.95	12.36	14.87	14.51	11.32	15.63	15.51
	11.17	14.16	14.32	12.26	14.42	14.48	11.51	15.34	15.29
mature-mt_tRNA-Val-TAC_CCA_end	25.98	29.07	29.27	26.44	28.6	28.36	26.39	30.17	29.55
	26.1	28.83	29.19	26.76	28.8	28.6	25.96	29.76	30.07
GAPDH	25.15	24.85	26.26	16.92	19.84	25.48	17.18	17.66	20.27
	25.03	24.75	26.14	16.8	19.31	25.88	17.31	17.39	20.12
TNF-α	27.22	27.56	36.7	26.09	28.08	34.24	27.24	28.23	32.46
	28.36	27.41	No Ct	26.1	27.7	No Ct	28.24	28.29	29.81
GAPDH	25.12	25.5	18.49	26.03	25.65	No Ct	25.04	25.28	25.33
	24.41	25.17	16.24	25.45	25.99	16.08	25.45	25.54	24.11
IL-6	22.85	23.49	23.15	21.96	21.69	16.4	22.72	22.15	25.4
	23.2	23.42	16.23	21.94	22.03	16.67	22.64	22.14	26.28
GAPDH	24.4	26.35	24.82	24.68	24.5	26.01	24.38	24.56	25.27
	24.09	26.58	24.6	25.06	24.18	25.51	24.25	24.68	25.08
Smad3	19.25	22.5	20.48	19.27	19.43	20.37	19.19	20.05	20.41
	20.17	22.46	20.24	19.24	19.47	20.47	19.24	19.99	20.23
GAPDH	24.4	26.35	27.15	24.68	24.5	25.33	24.38	24.56	25.45
	24.09	26.58	26.78	25.06	24.18	25.22	24.25	24.68	25.43
Ndufs6	16.46	19.25	19.87	16.31	16.29	17.35	16.25	17.09	18.22
	16.49	19.27	20.17	16.34	16.45	17.42	16.45	17.07	18.08
GAPDH	24.85	25.14	24.87	25.05	No Ct	25.98	25.1	16.28	No Ct
	24.75	24.41	25.06	24.77	22.42	23.72	24.12	16.69	16.08
Mrpl27	16.73	24.76	25.24	16.92	22.12	25.24	17.14	16.86	16.81
	17.63	24.52	24.56	16.8	21.6	26.98	17.07	17.07	16.41
GAPDH	24.4	26.35	27.15	24.68	24.5	25.33	24.38	24.56	25.45
	24.09	26.58	26.78	25.06	24.18	25.22	24.25	24.68	25.43
Mkl1	17.75	20.6	21.41	17.63	17.62	19.19	17.85	18.46	19.62
	17.85	20.71	21.74	17.54	17.66	19.09	17.43	18.18	19.68
